# Supplementary material for: Silicon dioxide nanoparticles induce insulin resistance through endoplasmic reticulum stress and generation of reactive oxygen species
Source: PubMed Central journal article supplement (PMC6836410; doi:10.1186/s12989-019-0327-z), 2019-11-07
Supplement: 12989_2019_327_MOESM1_ESM.pdf [file 12989_2019_327_MOESM1_ESM.pdf]

Figure S1

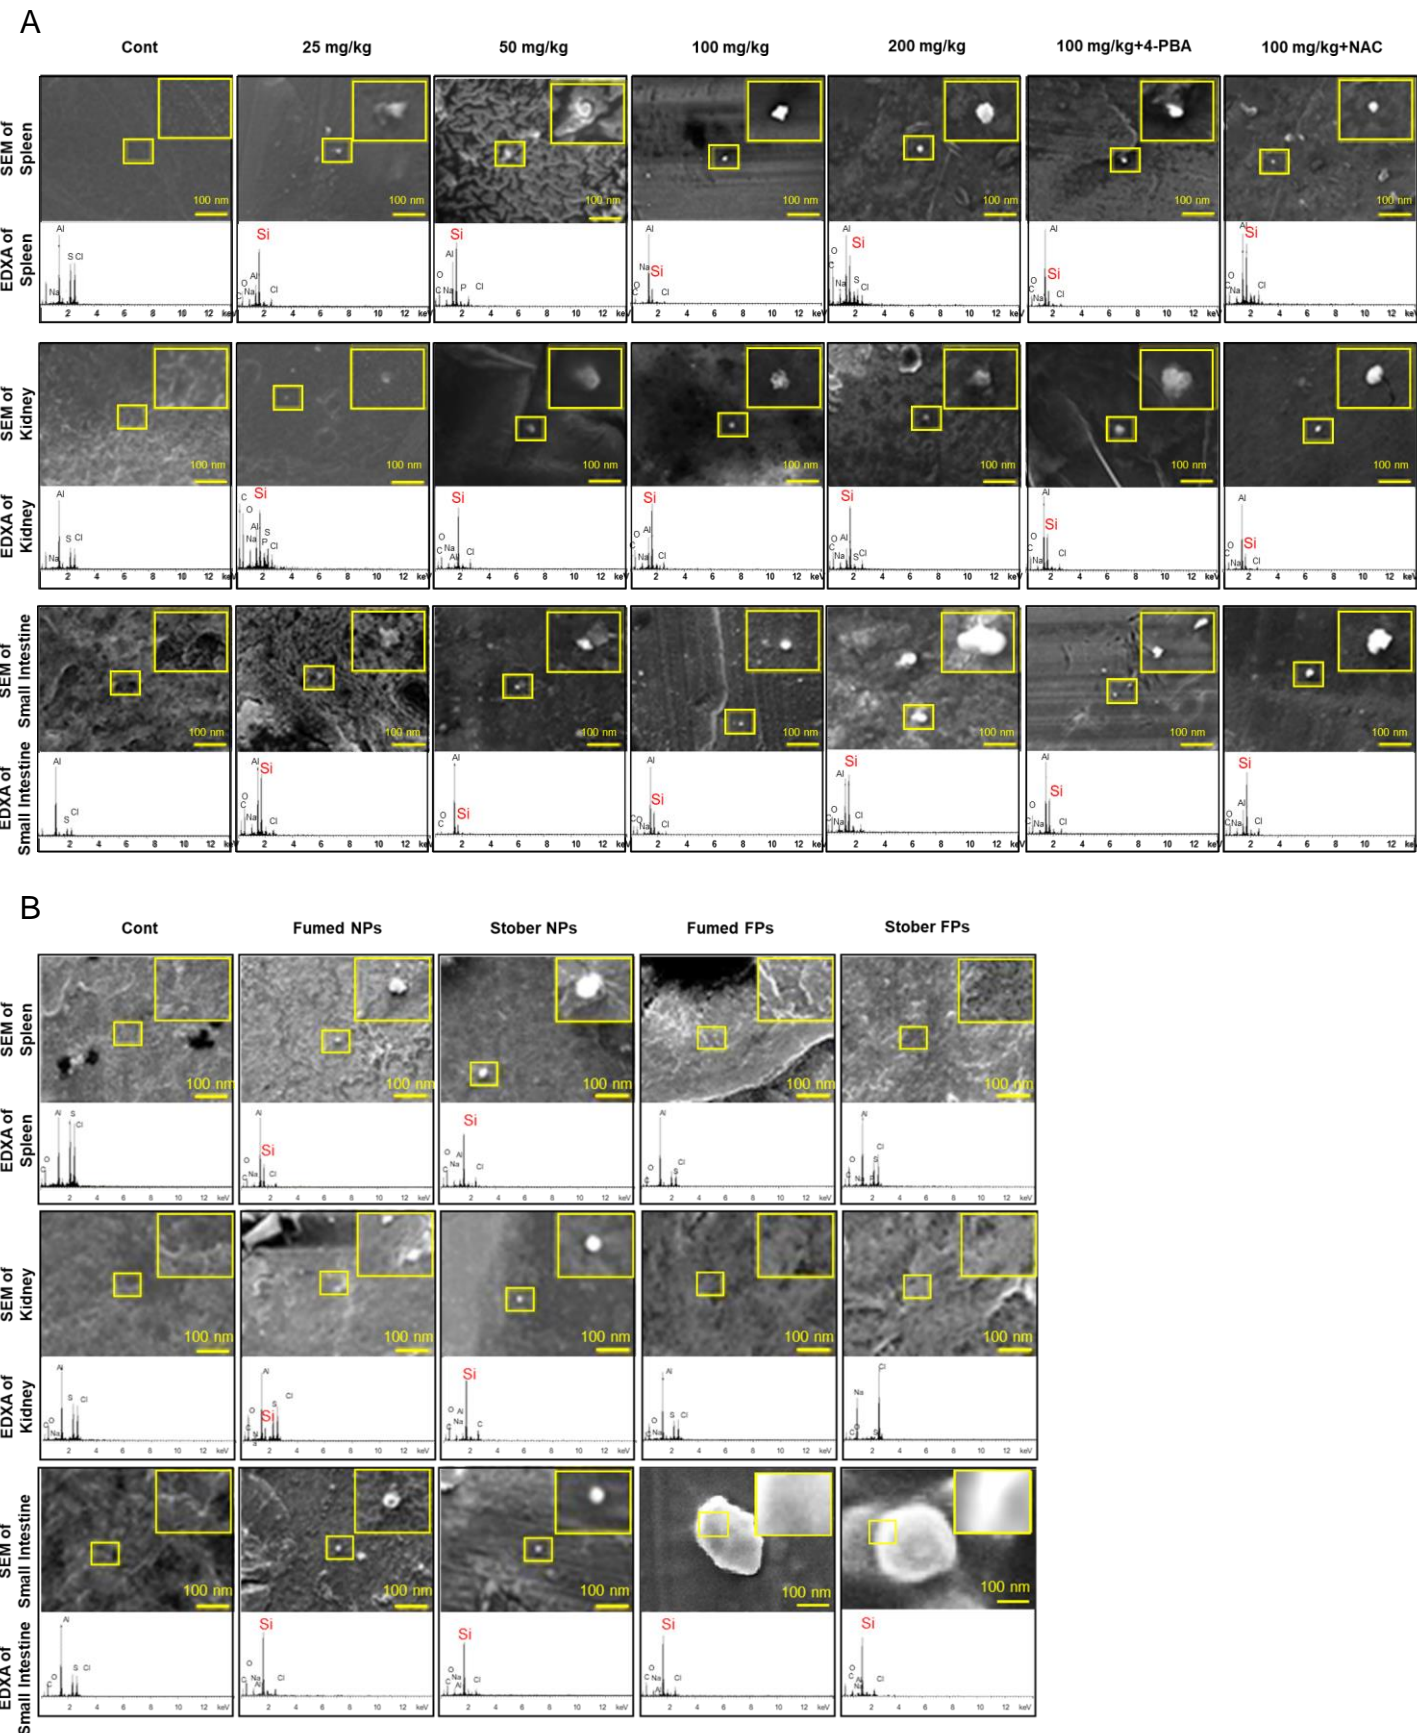

**Figure S1.** SEM (nanosized and finesized spherical white objects are SiO<sub>2</sub> NPs and FPs) and EDXA (arrows indicate silicon) of tissue homogenates. (A) SEM and EDXA of mice orally administrated with different dose of fumed SiO<sub>2</sub> NPs. (B) SEM and EDXA of mice orally administrated with fumed SiO<sub>2</sub> NPs, stober SiO<sub>2</sub> NPs, fumed SiO<sub>2</sub> FPs, stober SiO<sub>2</sub> FPs.

Figure S2

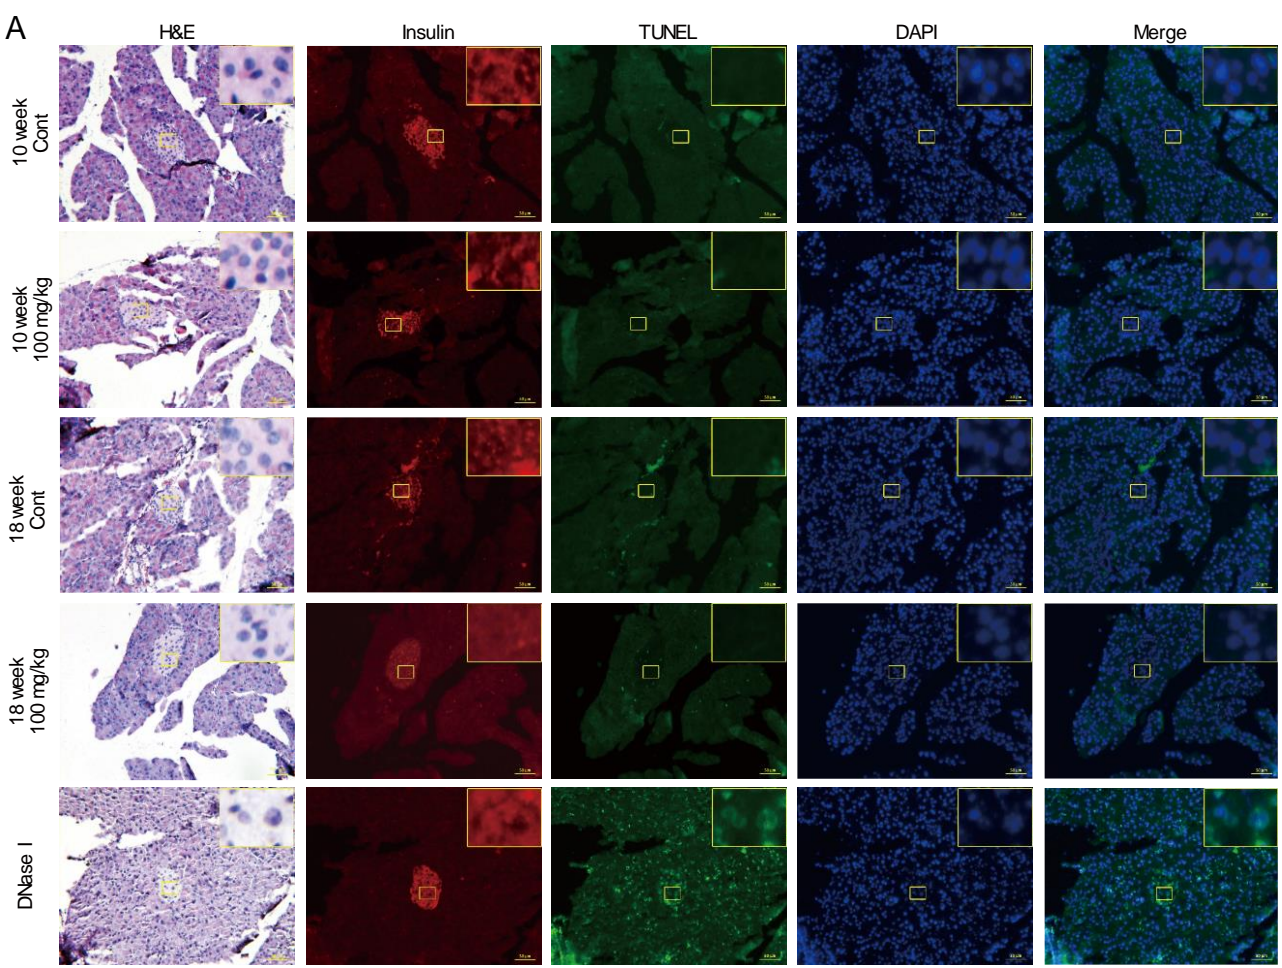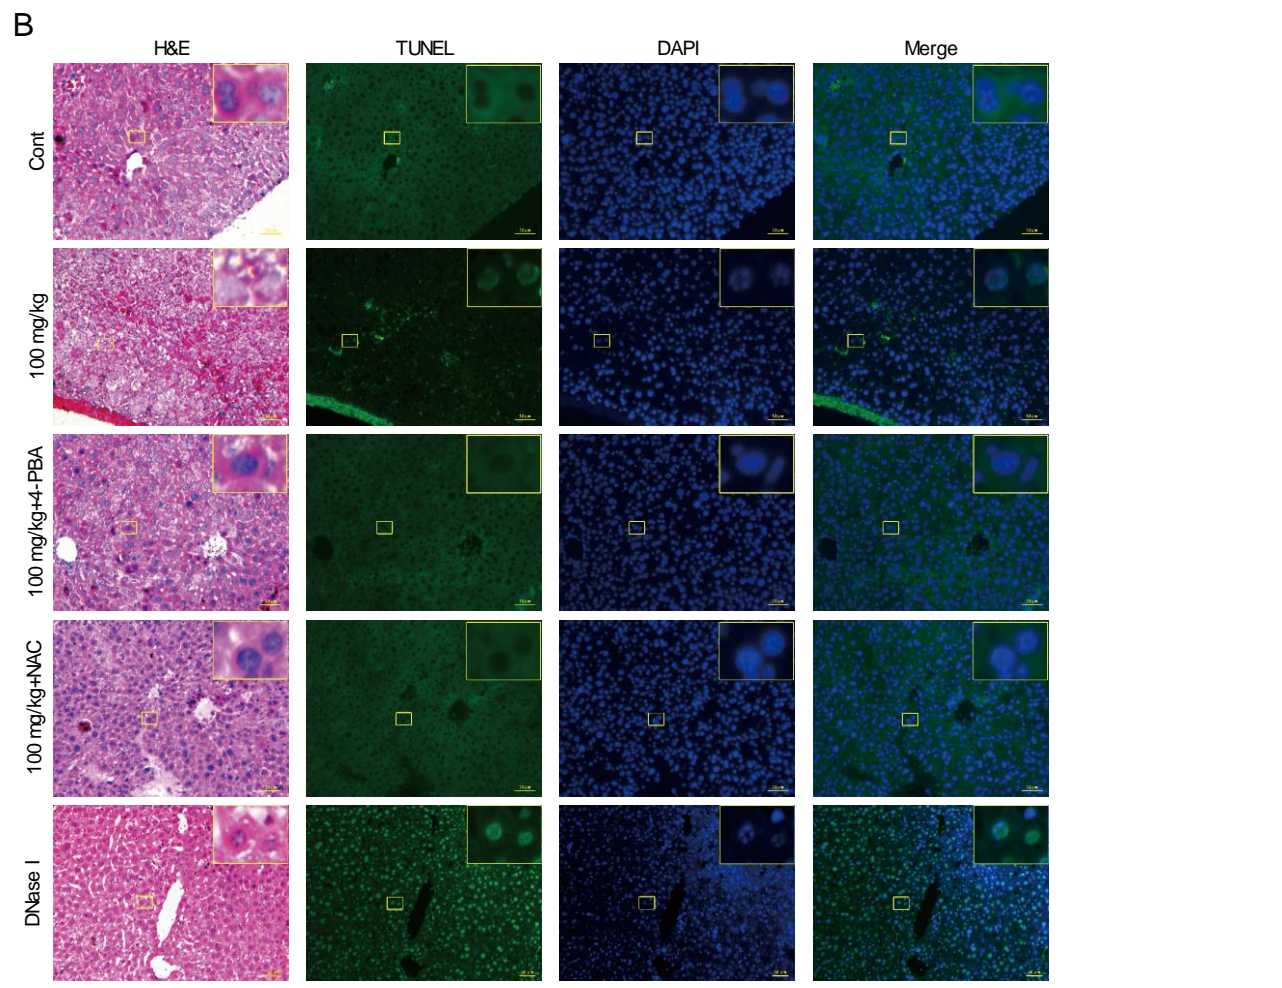

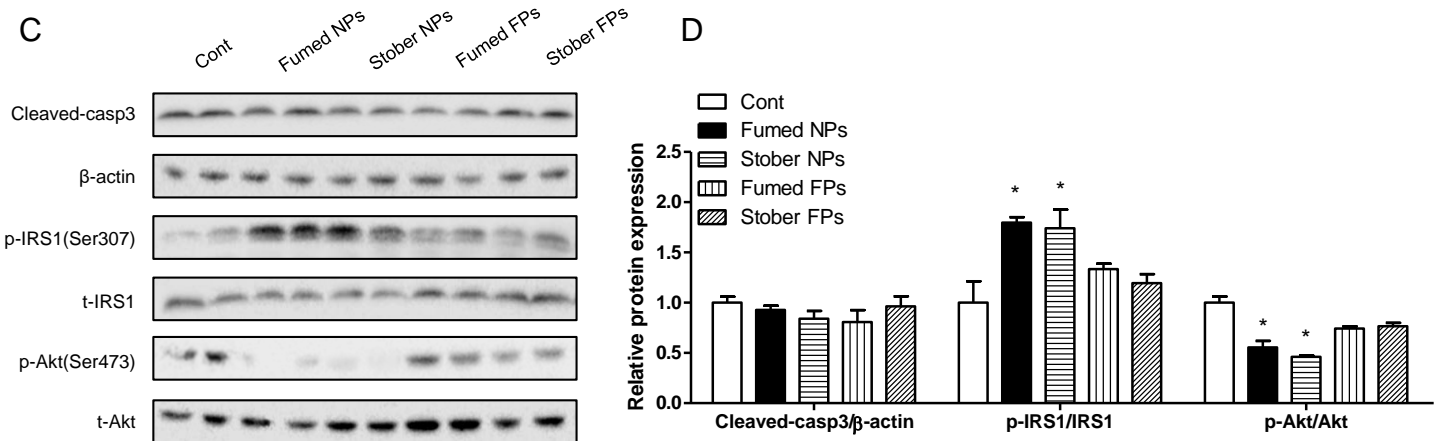

**Figure S2.** Effects of fumed SiO<sub>2</sub> NPs, stober SiO<sub>2</sub> NPs, fumed SiO<sub>2</sub> FPs and stober SiO<sub>2</sub> FPs on apoptosis and protein expression and protein phosphorylation. (A) Apoptosis of mouse pancreas cells (Insulin (red), TUNEL (green), and Nucleus (blue) co-staining). (B) Apoptosis of mouse liver cells (TUNEL (green) and nucleus (blue) co-staining). (C) Protein expression of Cleaved-caspase 3, and protein phosphorylation of IRS1 and Akt. (D) Ratios of Cleaved-caspase 3/β-actin, p-IRS1/IRS1 and p-Akt/Akt. \*  $P < 0.05$  vs. the control group. Results are the mean  $\pm$  SE (n = 10).

Figure S3

A

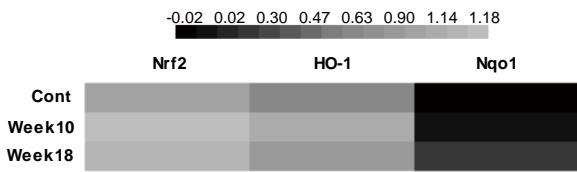

B

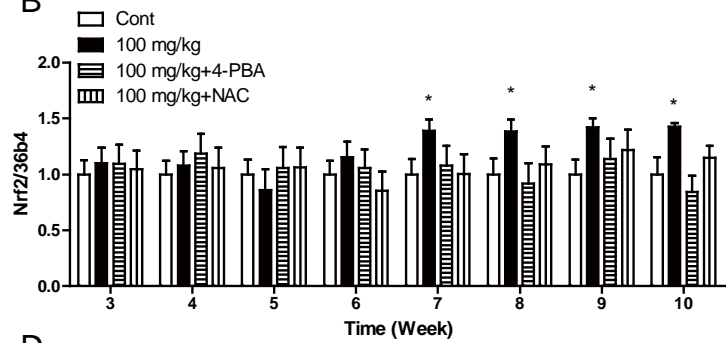

C

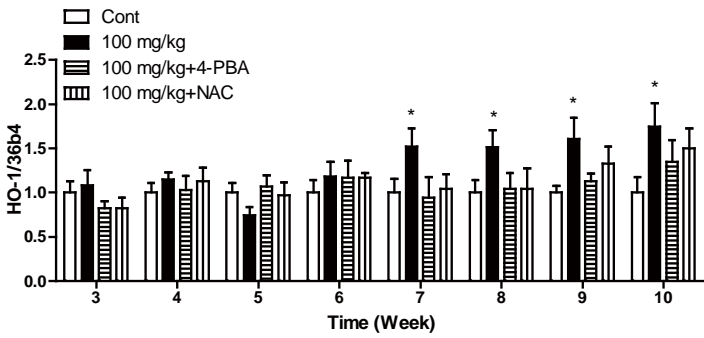

D

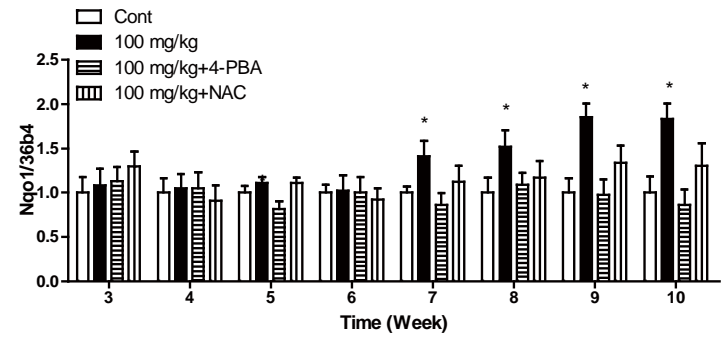

E

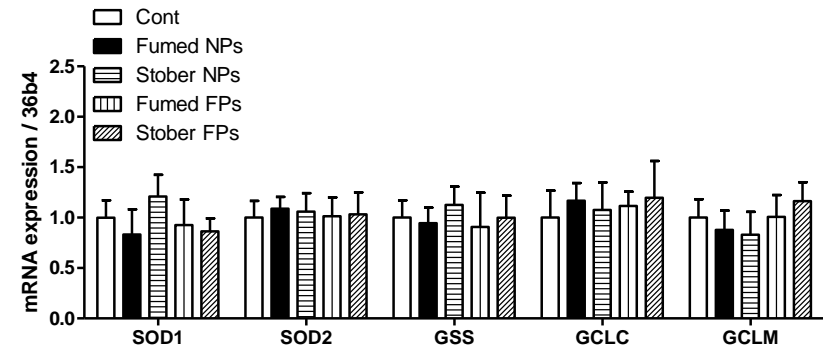

F

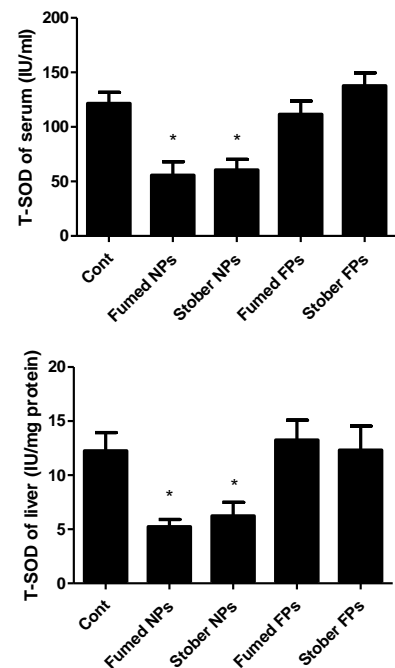

G

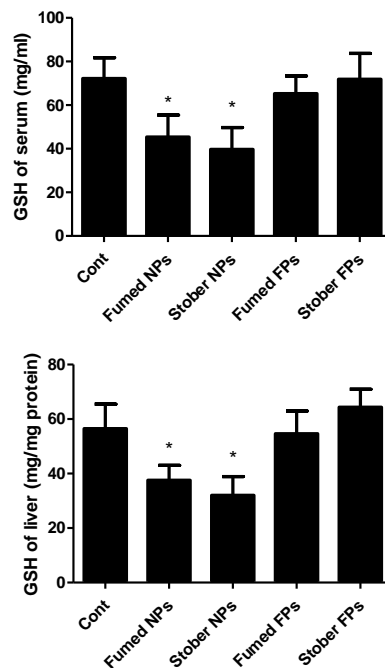

H

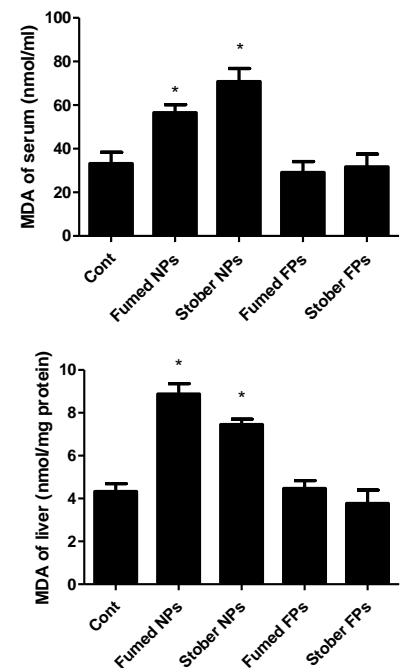

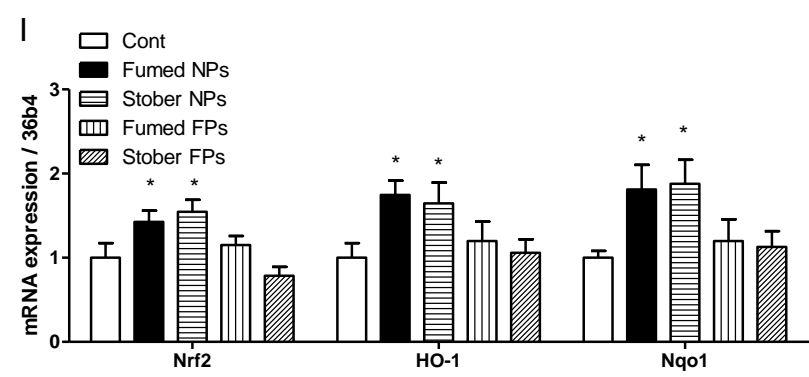

**Figure S3.** Oral administration of 100 mg/kg SiO<sub>2</sub> NPs increased plasma ROS levels, but oral administration of the same dose of SiO<sub>2</sub> FPs did not. (A) Fold changes of genes in the Nrf2 pathway, based on RNA-seq results. (B) Messenger RNA expression of Nrf2. (C) Messenger RNA expression of HO-1. (D) Messenger RNA expression of Nqo-1. (E) RT-qPCR results for ROS-related genes. (F) Levels of T-SOD in sera and livers. (G) Levels of GSH in sera and livers. (H) Levels of MDA in sera and livers. (I) RT-qPCR results for Nrf2 pathway genes. \*  $P < 0.05$  vs. the control group. Results are the mean  $\pm$  SE (n = 10).

Figure S4

A

| Gene       | Cont | Fumed NPs | Stober NPs | Fumed FPs | Stober FPs |
|------------|------|-----------|------------|-----------|------------|
| GRP78/36b4 | 1.0  | ~2.1*     | ~1.9*      | ~0.8      | ~1.1       |
| CHOP/36b4  | 1.0  | ~2.6*     | ~2.8*      | ~1.3      | ~0.9       |
| XBP1-s/t   | 1.0  | ~1.8*     | ~1.7*      | ~1.1      | ~0.8       |
| Cyp2b/36b4 | 1.0  | ~1.5*     | ~1.7*      | ~1.0      | ~1.1       |

B

C

| Marker          | Cont | Fumed NPs | Stober NPs | Fumed FPs | Stober FPs |
|-----------------|------|-----------|------------|-----------|------------|
| p-Eif2α/β-actin | 1.0  | ~1.9*     | ~1.8*      | ~1.1      | ~0.9       |
| GRP78/β-actin   | 1.0  | ~1.7*     | ~1.8*      | ~1.1      | ~1.1       |
| CHOP/β-actin    | 1.0  | ~1.8*     | ~1.8*      | ~1.2      | ~0.9       |
| ATF6/β-actin    | 1.0  | ~1.7*     | ~1.6*      | ~1.0      | ~0.8       |
| XBP1-s/t        | 1.0  | ~1.8*     | ~2.1*      | ~1.1      | ~1.0       |

**Figure S4.** Oral administration of 100 mg/kg SiO<sub>2</sub> NPs induced ER stress, but oral administration of the same dose of SiO<sub>2</sub> FPs did not. (A) RT-qPCR results for ER stress-related genes. (B) Protein expression of ER stress markers. (C) Ratios of ER stress markers. \* *P* < 0.05 vs. the control group. Results are the mean ± SE (n = 10).

Figure S5

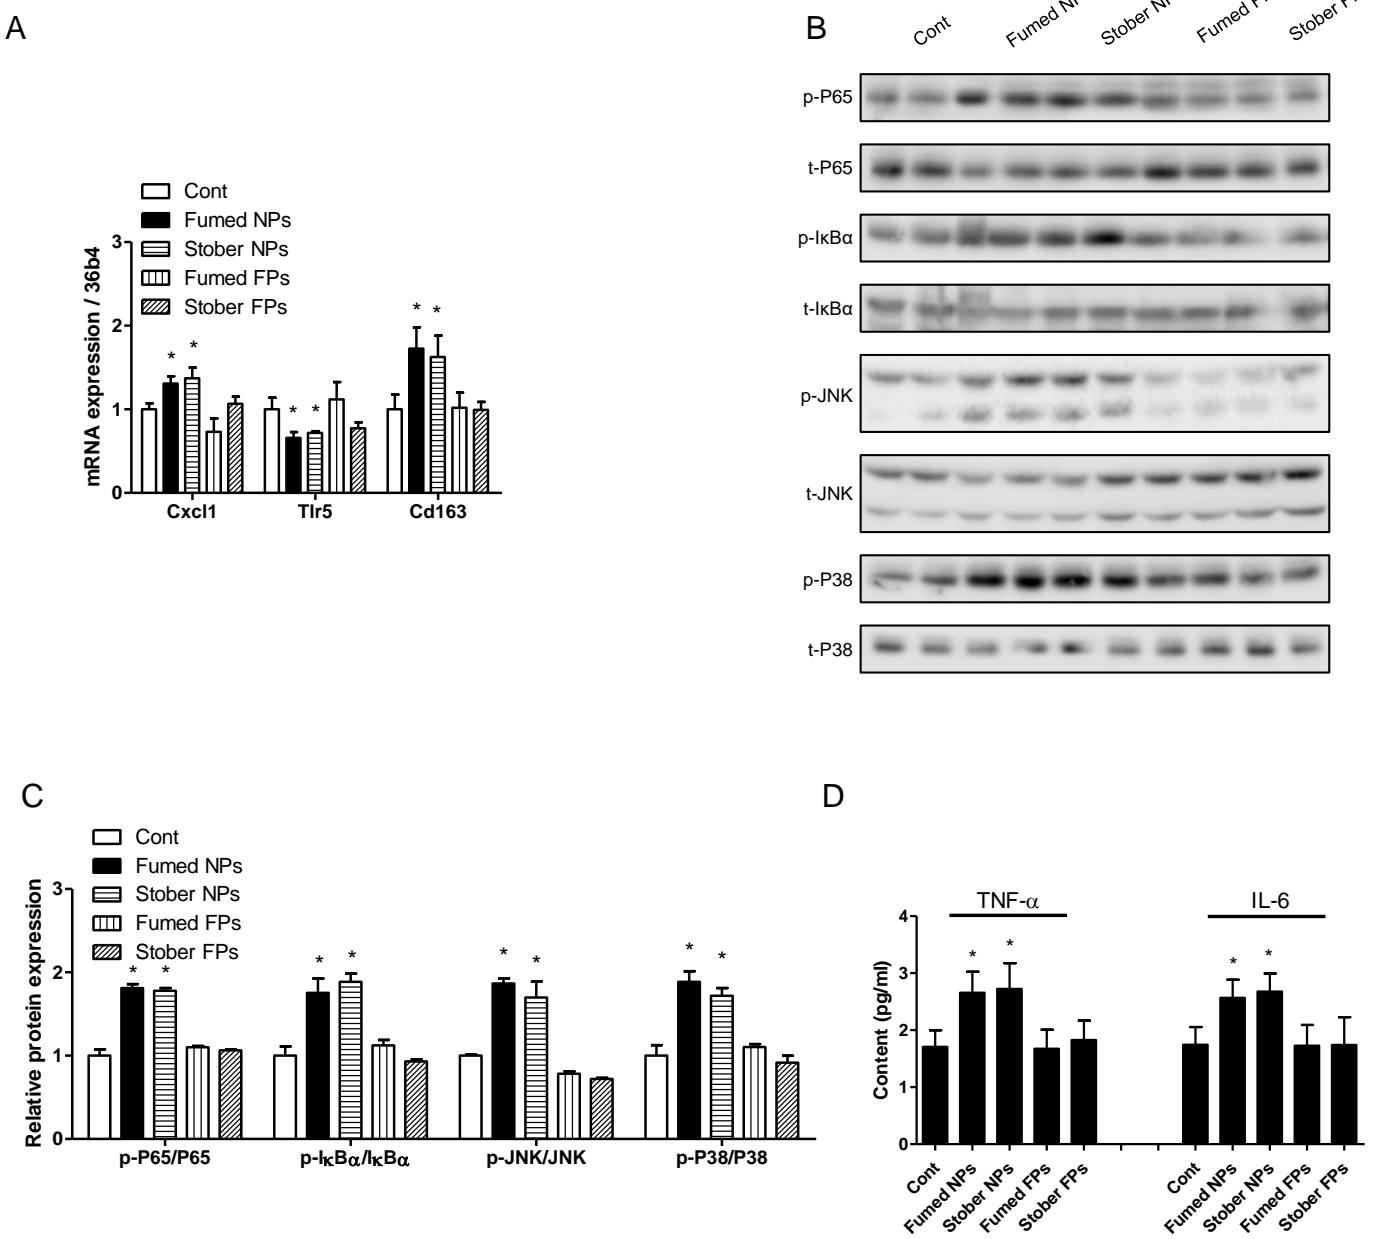

**Figure S5.** Oral administration of 100 mg/kg SiO<sub>2</sub> NPs activated the NF-κB and MAPK pathways and induced inflammation response in livers of mice, but oral administration of the same dose of SiO<sub>2</sub> FPs did not. (A) RT-qPCR results for inflammation response-related genes. (B) Protein phosphorylation of NF-κB-p65, IκBα, JNK, and p38-MAPK. (C) Ratios of p-P65/P65, p-IκBα/IκBα, p-JNK/JNK, and p-P38/P38. \*  $P < 0.05$  vs. the control group. Results are the mean  $\pm$  SE (n = 10).
