# Supplementary material for: Silicon dioxide nanoparticles induce insulin resistance through endoplasmic reticulum stress and generation of reactive oxygen species
Source: Part Fibre Toxicol. 2019 Nov 7;16:41. doi: 10.1186/s12989-019-0327-z (PMC6836410; doi:10.1186/s12989-019-0327-z)
Supplement: Supplementary file 2 — Additional file 2: Table S1. Significant differently expressed genes of RNA-seq (XLS 599 kb) [file 12989_2019_327_MOESM2_ESM.xls]

## Sheet: Sheet1
Table S1: Significant differently expressed genes of RNA-seq
Geneid	Chr	Start	End	Strand	Length	cont	week 10	week 18
Nfe2l2	2;2;2;2;2;2;2	75675513;75677545;75678488;75679163;75691052;75704364;75704364	75677184;75677712;75678577;75679429;75692372;75704489;75704641	-;-;-;-;-;-;-	3796	2.89215	6.93185	8.65293
SYVN1	19;19;19;19;19;19;19;19;19;19;19;19;19;19;19;19;19;19;19;19;19;19;19;19;19;19;19;19;19;19;19;19;19;19;19;19;19;19;19;19;19;19;19;19;19;19;19;19;19;19;19;19;19;19;19;19;19;19;19;19;19;19;19;19;19;19;19;19;19;19;19;19;19;19;19;19;19;19;19;19;19;19;19	6046576;6046638;6046662;6047065;6047080;6047085;6047104;6047917;6047917;6047917;6047917;6047917;6047917;6047917;6048275;6048275;6048275;6048275;6048275;6048275;6048275;6048455;6048455;6048455;6048455;6048455;6048455;6048455;6048695;6048695;6048695;6048695;6049150;6049150;6049150;6049150;6049150;6049150;6049771;6049771;6049771;6049771;6049992;6049992;6049992;6049992;6050170;6050170;6050170;6050170…	6047128;6046981;6047128;6047128;6047330;6047128;6047128;6048065;6048065;6048065;6048065;6048065;6048065;6048065;6048367;6048367;6048367;6048367;6048367;6048367;6048367;6048607;6048743;6048607;6048743;6048607;6048607;6048607;6048743;6048743;6048743;6048743;6049651;6049253;6050091;6049253;6049203;6049253;6049897;6049897;6049897;6049897;6050091;6050091;6050091;6050091;6050235;6050235;6050235;6050235…	+;+;+;+;+;+;+;+;+;+;+;+;+;+;+;+;+;+;+;+;+;+;+;+;+;+;+;+;+;+;+;+;+;+;+;+;+;+;+;+;+;+;+;+;+;+;+;+;+;+;+;+;+;+;+;+;+;+;+;+;+;+;+;+;+;+;+;+;+;+;+;+;+;+;+;+;+;+;+;+;+;+;+	4772	0.640256	1.94967	1.76448
HERPUD1	8;8;8;8;8;8;8;8;8;8;8;8;8;8;8;8;8;8;8;8;8;8;8;8;8;8;8;8;8;8;8;8;8;8	94386438;94386495;94387553;94387599;94389356;94389356;94389356;94389356;94389521;94389521;94389521;94389524;94390718;94390718;94390718;94390718;94390790;94391732;94391732;94391732;94391732;94391732;94392174;94392174;94392174;94392174;94392174;94393531;94393796;94393796;94394591;94394591;94394591;94395046	94386738;94386738;94387580;94387686;94389433;94389433;94389433;94389433;94389595;94389595;94389595;94389595;94390848;94390848;94390848;94390848;94390848;94391854;94391854;94391854;94391854;94391854;94392309;94392495;94392469;94392524;94392524;94393901;94393901;94393901;94394909;94395358;94395377;94395364	+;+;+;+;+;+;+;+;+;+;+;+;+;+;+;+;+;+;+;+;+;+;+;+;+;+;+;+;+;+;+;+;+;+	2333	0.236625	0.834577	0.644402
Nqo1	8;8;8;8;8;8	107388225;107391045;107392122;107392641;107392848;107403066	107389124;107391146;107392235;107392771;107393012;107403206	-;-;-;-;-;-	1553	0.182243	0.741907	0.911729
Eif2ak3	6;6;6;6;6;6;6;6;6;6;6;6;6;6;6;6;6;6;6;6;6;6;6;6;6;6;6;6;6;6;6;6;6;6	70844515;70844553;70844556;70858387;70858387;70864498;70876678;70878561;70878835;70878835;70881484;70881484;70882265;70882265;70883595;70883595;70884770;70884770;70885161;70885161;70887800;70887800;70889475;70889475;70890065;70890065;70892355;70892355;70896764;70896916;70900232;70900232;70901405;70904088	70845021;70845021;70845619;70858516;70858516;70864825;70876872;70878700;70878968;70878968;70881718;70881718;70882427;70882427;70883735;70883735;70884892;70884892;70885381;70885381;70887912;70887912;70889597;70889597;70890214;70890214;70893436;70893141;70897083;70897083;70900258;70900333;70901467;70905245	+;+;+;+;+;+;+;+;+;+;+;+;+;+;+;+;+;+;+;+;+;+;+;+;+;+;+;+;+;+;+;+;+;+	6026	3.16013	5.33876	5.83093
Hmox1	8;8;8;8;8;8;8	75093621;75095856;75096844;75096850;75098766;75098766;75099886	75093772;75095976;75097341;75097341;75098865;75099041;75100589	+;+;+;+;+;+;+	1751	0.278029	0.571664	0.570095
Hspa5	2;2;2;2;2;2;2;2;2;2;2;2;2;2;2;2;2;2;2;2;2;2;2;2;2;2;2;2	34771970;34772095;34772099;34772229;34772229;34772559;34772559;34772581;34772725;34773170;34773170;34773170;34773170;34773666;34773821;34773821;34773821;34774028;34774028;34774028;34774535;34774535;34774847;34775066;34775066;34775551;34775551;34775551	34772146;34772446;34772146;34772453;34772446;34772790;34772790;34772790;34772790;34773307;34773307;34773307;34773307;34773933;34774192;34773933;34773933;34774333;34774418;34774418;34774772;34774772;34775233;34775233;34775233;34775615;34776531;34777547	+;+;+;+;+;+;+;+;+;+;+;+;+;+;+;+;+;+;+;+;+;+;+;+;+;+;+;+	4229	2.0406	14.444	7.59957
Ddit3	10;10;10;10;10;10;10;10;10	127290774;127290793;127290794;127293712;127293712;127295321;127295321;127295723;127295723	127290891;127290891;127290891;127294582;127293759;127295478;127295478;127296065;127296288	+;+;+;+;+;+;+;+;+	1713	5.2692	7.95609	8.72458
STT3B	9;9;9;9;9;9;9;9;9;9;9;9;9;9;9;9	115242581;115246045;115248505;115250779;115251678;115252499;115253833;115254789;115256133;115257436;115258462;115266094;115267310;115276704;115280411;115309752	115244045;115246257;115248618;115250952;115251849;115252686;115254044;115254943;115256181;115257582;115258560;115266193;115267375;115276991;115280519;115310421	-;-;-;-;-;-;-;-;-;-;-;-;-;-;-;-	4221	4.21911	11.9139	8.94989
9930111J21Rik2	11;11;11;11;11;11;11;11;11	49015874;49037660;49038584;49039421;49050883;49050883;49050883;49051144;49051148	49020392;49039818;49039818;49039818;49051031;49051122;49051031;49051225;49051242	-;-;-;-;-;-;-;-;-	7017	0.664078	2.23443	1.52734
A930005N03Rik	1	34269882	34271128	-	1247	1.64774	4.01483	5.18532
A930033H14Rik	10;10	69209762;69212753	69212384;69213098	-;-	2969	1.94024	9.30563	6.09086
Aacs	5;5;5;5;5;5;5;5;5;5;5;5;5;5;5;5;5;5;5;5;5;5;5;5;5;5;5;5;5;5;5;5	125475814;125482830;125484537;125489783;125494907;125503183;125503549;125506149;125506149;125508677;125508677;125509493;125509779;125509779;125511640;125511640;125511640;125511846;125511846;125512625;125512625;125512699;125513084;125513102;125513919;125514169;125514197;125514863;125514928;125515243;125516216;125516216	125476109;125482933;125484657;125489896;125495004;125503297;125503630;125506296;125506296;125508757;125508757;125509903;125509903;125509903;125511968;125511704;125511704;125511896;125511968;125512737;125512738;125512738;125513201;125513227;125513988;125514227;125514227;125514994;125515130;125515347;125516355;125517410	+;+;+;+;+;+;+;+;+;+;+;+;+;+;+;+;+;+;+;+;+;+;+;+;+;+;+;+;+;+;+;+	3854	2.43722	9.12534	8.40725
Abcb1a	5;5;5;5;5;5;5;5;5;5;5;5;5;5;5;5;5;5;5;5;5;5;5;5;5;5;5;5;5;5;5;5;5;5;5;5;5;5;5;5;5;5;5	8660077;8660662;8664546;8674683;8683384;8685221;8686127;8694066;8698486;8701609;8701867;8702153;8702369;8702793;8713187;8714887;8715742;8718979;8719819;8719849;8719991;8719991;8723159;8723159;8723159;8726773;8726773;8732292;8732292;8733288;8733599;8733599;8737615;8737615;8737615;8738695;8738695;8740409;8740409;8746509;8746509;8747355;8747355	8660222;8660732;8664594;8674842;8683435;8685412;8686298;8694190;8698657;8701722;8701977;8702278;8702572;8702963;8713348;8715063;8715888;8719086;8720068;8719883;8720068;8720068;8723174;8723242;8723242;8726976;8726976;8732392;8732392;8733739;8733739;8733739;8737656;8737771;8737771;8738892;8738892;8740615;8740615;8746655;8746655;8748570;8748575	+;+;+;+;+;+;+;+;+;+;+;+;+;+;+;+;+;+;+;+;+;+;+;+;+;+;+;+;+;+;+;+;+;+;+;+;+;+;+;+;+;+;+	5480	0.287909	2.06968	1.32906
Abcc4	14;14;14;14;14;14;14;14;14;14;14;14;14;14;14;14;14;14;14;14;14;14;14;14;14;14;14;14;14;14;14;14;14;14;14;14;14;14;14;14;14;14;14;14;14;14;14;14;14;14;14;14;14;14;14;14;14;14;14;14;14	118482692;118482692;118490499;118490499;118499966;118499966;118500708;118500708;118507593;118507593;118516433;118516433;118526212;118526212;118527951;118527951;118528967;118528967;118529858;118529858;118533992;118533992;118553284;118553284;118594762;118594762;118596680;118596680;118597139;118597139;118597494;118597494;118599314;118599314;118604157;118604157;118611437;118611437;118611718;118611718…	118484440;118484440;118490633;118490633;118500071;118500071;118500880;118500880;118507682;118507682;118516588;118516588;118526403;118526403;118528051;118528051;118529077;118529077;118529977;118529977;118534142;118534142;118553363;118553363;118594908;118594908;118596774;118596774;118597176;118597176;118597634;118597634;118599523;118599523;118604253;118604253;118611523;118611523;118611812;118611812…	-;-;-;-;-;-;-;-;-;-;-;-;-;-;-;-;-;-;-;-;-;-;-;-;-;-;-;-;-;-;-;-;-;-;-;-;-;-;-;-;-;-;-;-;-;-;-;-;-;-;-;-;-;-;-;-;-;-;-;-;-	5729	0.333036	0.776788	0.818589
Abcd2	15;15;15;15;15;15;15;15;15;15	91145884;91151655;91159104;91163054;91174591;91178231;91179076;91182681;91188835;91190670	91149205;91151780;91159188;91163199;91174736;91178325;91179241;91182802;91189015;91191807	-;-;-;-;-;-;-;-;-;-	5527	2.0978	8.18597	6.3638
Abcg3	5;5;5;5;5;5;5;5;5;5;5;5;5;5;5;5;5;5;5;5;5;5;5;5;5;5;5;5;5;5	104935057;104935679;104938183;104938183;104939142;104939142;104948322;104948322;104951517;104951517;104953084;104961177;104961177;104963430;104963430;104966728;104966728;104968147;104968147;104969395;104969395;104973979;104973979;104974648;104974648;104975363;104975363;104977613;104977613;104982549	104936103;104936618;104938268;104938268;104939231;104939231;104948476;104948476;104951641;104951641;104953173;104961259;104961259;104963677;104963677;104966829;104966829;104968298;104968298;104969531;104969531;104974131;104974131;104974762;104974762;104975422;104975422;104977834;104977834;104982718	-;-;-;-;-;-;-;-;-;-;-;-;-;-;-;-;-;-;-;-;-;-;-;-;-;-;-;-;-;-	3550	0.516783	2.48105	1.04082
Acaca	11;11;11;11;11;11;11;11;11;11;11;11;11;11;11;11;11;11;11;11;11;11;11;11;11;11;11;11;11;11;11;11;11;11;11;11;11;11;11;11;11;11;11;11;11;11;11;11;11;11;11;11;11;11;11;11;11;11;11;11;11;11;11;11;11;11;11;11;11;11;11;11;11;11;11;11;11;11;11;11;11;11;11;11;11;11;11;11;11;11;11;11;11;11;11;11;11;11;11;11;11;11;11;11;11;11;11;11;11;11;11;11;11;11;11;11;11;11;11;11;11;11;11;11;11;11;11;11;11;11;11;11;11;…	84129672;84129700;84173122;84173354;84179831;84179831;84179858;84180538;84193079;84193079;84193079;84193079;84195438;84195438;84195438;84195438;84195438;84195438;84195438;84214158;84214158;84214158;84214158;84214158;84214158;84214158;84215834;84215834;84215834;84215834;84223142;84223142;84223142;84223142;84224444;84224444;84224444;84224444;84226134;84226134;84226134;84226134;84228920;84228920;842…	84130130;84133111;84173555;84173555;84179926;84179926;84179926;84180596;84193125;84193125;84193125;84193125;84195687;84195687;84195687;84195687;84195687;84195687;84195687;84214184;84214290;84214195;84214290;84214290;84214290;84214290;84215972;84215972;84215972;84215972;84223251;84223251;84223251;84223251;84224525;84224525;84224525;84224525;84226232;84226232;84226232;84226232;84229026;84229026;842…	+;+;+;+;+;+;+;+;+;+;+;+;+;+;+;+;+;+;+;+;+;+;+;+;+;+;+;+;+;+;+;+;+;+;+;+;+;+;+;+;+;+;+;+;+;+;+;+;+;+;+;+;+;+;+;+;+;+;+;+;+;+;+;+;+;+;+;+;+;+;+;+;+;+;+;+;+;+;+;+;+;+;+;+;+;+;+;+;+;+;+;+;+;+;+;+;+;+;+;+;+;+;+;+;+;+;+;+;+;+;+;+;+;+;+;+;+;+;+;+;+;+;+;+;+;+;+;+;+;+;+;+;+;+;+;+;+;+;+;+;+;+;+;+;+;+;+;+;+;+	17074	1.5795	5.1688	6.38189
Acmsd	1;1;1;1;1;1;1;1;1;1;1;1;1;1	127729413;127738551;127739943;127745776;127748989;127753788;127756757;127758004;127759659;127759659;127765880;127765880;127766283;127766283	127729542;127738595;127740039;127745825;127749225;127753881;127756870;127758099;127759831;127759831;127765978;127765978;127767978;127767978	+;+;+;+;+;+;+;+;+;+;+;+;+;+	2831	2.15147	5.6001	5.65988
Acsl4	X;X;X;X;X;X;X;X;X;X;X;X;X;X;X;X;X;X;X;X;X;X;X;X;X;X;X;X;X;X;X;X;X;X;X;X;X;X;X;X;X;X;X;X;X;X;X;X;X;X;X;X;X;X;X;X;X;X;X;X;X;X;X;X;X;X;X	142317993;142317993;142317993;142317993;142320671;142321780;142327976;142327976;142327976;142327976;142327976;142328848;142328848;142328848;142328848;142332192;142332192;142332192;142332192;142333670;142333670;142333670;142333670;142338884;142338884;142338884;142338884;142339950;142339950;142339950;142339950;142341335;142341335;142341335;142341335;142343074;142343074;142343074;142343074;142343307…	142320834;142320834;142320834;142320834;142320834;142321856;142328025;142328133;142328133;142328133;142328133;142328962;142328962;142328962;142328962;142332383;142332383;142332383;142332383;142333744;142333744;142333744;142333744;142339056;142339056;142339056;142339056;142340089;142340089;142340089;142340089;142341406;142341406;142341406;142341406;142343197;142343197;142343197;142343197;142343457…	-;-;-;-;-;-;-;-;-;-;-;-;-;-;-;-;-;-;-;-;-;-;-;-;-;-;-;-;-;-;-;-;-;-;-;-;-;-;-;-;-;-;-;-;-;-;-;-;-;-;-;-;-;-;-;-;-;-;-;-;-;-;-;-;-;-;-	5405	8.26834	21.5558	19.943
Acvrl1	15;15;15;15;15;15;15;15;15;15;15;15;15;15;15;15;15;15;15;15;15;15;15;15;15;15;15;15;15;15;15;15;15;15;15;15;15;15;15;15;15;15;15;15;15;15;15;15;15;15;15;15;15;15;15;15;15;15;15;15;15;15;15;15;15;15;15;15;15;15;15;15;15;15;15;15;15;15;15;15;15;15;15;15	101128522;101128537;101128551;101128551;101128574;101128922;101128924;101128927;101128927;101128927;101128927;101128927;101129965;101129965;101131343;101133415;101134133;101134137;101134607;101134607;101134645;101134645;101134645;101134676;101134676;101134676;101134676;101135298;101135298;101135298;101135298;101135298;101135298;101135298;101135298;101135657;101135749;101135749;101135749;101135749…	101128583;101128583;101128583;101128583;101128583;101129063;101129063;101129063;101129063;101129063;101129063;101129063;101130051;101130051;101131471;101133493;101134197;101134197;101134743;101134743;101134743;101134743;101134743;101134743;101134743;101134743;101134694;101135543;101135462;101135543;101135543;101135543;101135543;101135311;101135543;101135960;101135960;101135960;101135960;101135960…	+;+;+;+;+;+;+;+;+;+;+;+;+;+;+;+;+;+;+;+;+;+;+;+;+;+;+;+;+;+;+;+;+;+;+;+;+;+;+;+;+;+;+;+;+;+;+;+;+;+;+;+;+;+;+;+;+;+;+;+;+;+;+;+;+;+;+;+;+;+;+;+;+;+;+;+;+;+;+;+;+;+;+;+	4265	0.206471	0.56519	0.583109
Adamdec1	14;14;14;14;14;14;14;14;14;14;14;14;14;14	68563388;68565518;68568711;68570071;68570892;68571332;68571753;68572826;68573079;68577087;68577851;68579154;68580537;68581959	68564375;68565600;68568885;68570201;68570973;68571498;68571824;68572885;68573265;68577163;68577929;68579230;68580655;68582086	-;-;-;-;-;-;-;-;-;-;-;-;-;-	2425	0.211828	0.968547	0.732536
Adgre1	17;17;17;17;17;17;17;17;17;17;17;17;17;17;17;17;17;17;17;17;17;17;17;17;17;17;17;17;17;17;17;17;17;17;17;17;17;17;17;17;17;17;17;17;17	57358686;57358714;57361672;57361672;57401905;57401905;57402501;57402501;57402742;57402742;57406834;57406834;57408346;57408346;57410718;57410718;57410945;57410945;57413673;57413673;57419322;57419322;57420347;57420347;57441255;57441255;57443898;57443898;57445009;57445009;57447830;57447830;57449866;57449866;57460693;57460693;57475829;57475829;57478772;57478772;57480920;57480920;57483115;57483115;574…	57358756;57358756;57361734;57361734;57402051;57402051;57402656;57402656;57402861;57402861;57406980;57406980;57408495;57408495;57410858;57410858;57411091;57411091;57413761;57413761;57419405;57419405;57420524;57420524;57441371;57441371;57444082;57444082;57445179;57445179;57448024;57448024;57450101;57450101;57460759;57460759;57475920;57475920;57478940;57478940;57481024;57481024;57483167;57483529;574…	+;+;+;+;+;+;+;+;+;+;+;+;+;+;+;+;+;+;+;+;+;+;+;+;+;+;+;+;+;+;+;+;+;+;+;+;+;+;+;+;+;+;+;+;+	3245	0.90457	5.6761	2.14591
Adgre4	17;17;17;17;17;17;17;17;17;17;17;17;17;17;17;17;17	55749984;55760512;55777996;55778809;55784971;55791474;55791919;55794641;55797597;55799609;55802009;55814154;55817056;55818667;55820575;55843205;55852207	55750092;55760602;55778046;55778931;55785123;55791514;55792054;55794742;55797781;55799776;55802212;55814389;55817122;55818758;55820755;55843300;55853662	+;+;+;+;+;+;+;+;+;+;+;+;+;+;+;+;+	3491	0.336331	3.40823	1.36372
Adrb2	18	62177817	62179959	-	2143	0.273946	2.61973	0.72946
Aif1	17;17;17;17;17;17;17;17;17;17;17;17;17;17;17;17;17;17;17;17;17;17;17;17;17;17;17;17;17;17;17;17;17;17;17;17;17;17	35170991;35170991;35170992;35170994;35170996;35171414;35171414;35171414;35171414;35171414;35171523;35171763;35171763;35171763;35171763;35171763;35171763;35172128;35172128;35172128;35172128;35172128;35172285;35172285;35172285;35172285;35172285;35172515;35172515;35172515;35172515;35172530;35173141;35173141;35173141;35175973;35175973;35175973	35171193;35171193;35171193;35171193;35171193;35171576;35171576;35171576;35171576;35171576;35171576;35171939;35171804;35171804;35171804;35171804;35171858;35172194;35172194;35172194;35172194;35172194;35172346;35172346;35172346;35172346;35172346;35172631;35172689;35172689;35172819;35173275;35173275;35173278;35173275;35176001;35176068;35176001	-;-;-;-;-;-;-;-;-;-;-;-;-;-;-;-;-;-;-;-;-;-;-;-;-;-;-;-;-;-;-;-;-;-;-;-;-;-	1532	0.862205	5.32554	2.73649
Ak7	12;12;12;12;12;12;12;12;12;12;12;12;12;12;12;12;12;12	105705982;105710145;105713503;105715985;105726187;105733433;105734890;105738574;105741009;105742236;105745204;105747186;105761468;105763953;105766554;105768530;105780850;105781671	105706266;105710336;105713611;105716079;105726297;105733513;105734978;105738664;105741086;105742385;105745332;105747315;105761596;105764021;105766751;105768750;105781008;105782447	+;+;+;+;+;+;+;+;+;+;+;+;+;+;+;+;+;+	3093	0.0949023	0.619484	0.459463
Akap13	7;7;7;7;7;7;7;7;7;7;7;7;7;7;7;7;7;7;7;7;7;7;7;7;7;7;7;7;7;7;7;7;7;7;7;7;7;7;7;7;7;7;7;7;7;7;7;7;7;7;7;7;7;7;7;7;7;7;7;7;7;7;7;7;7;7;7;7;7;7;7;7;7;7;7;7;7;7;7;7;7;7;7;7;7;7;7;7;7;7;7;7;7;7;7;7;7;7;7;7;7;7;7;7;7;7;7;7;7;7;7;7;7;7;7;7;7;7;7;7;7;7;7;7;7;7;7;7;7;7;7;7;7;7;7;7;7;7;7;7;7;7;7;7;7;7;7;7;7;7	75455534;75455534;75455557;75455868;75534808;75534808;75534808;75534808;75569884;75569884;75569884;75569884;75579502;75579502;75579502;75579502;75586157;75586157;75586157;75602786;75602786;75602786;75608485;75608485;75610039;75611103;75611833;75611840;75612284;75614688;75614921;75614921;75614921;75614921;75614921;75614921;75643319;75644185;75663412;75663412;75663412;75663412;75663412;75663412;756…	75455748;75455748;75455748;75456095;75534851;75534851;75534851;75534851;75570031;75570031;75570031;75570031;75579798;75580376;75579798;75579798;75586340;75586340;75586340;75603301;75602978;75602978;75611548;75611560;75611548;75611548;75612440;75613294;75612440;75615048;75615048;75615048;75615048;75615048;75615048;75615048;75643464;75644216;75663487;75663487;75663487;75663487;75663487;75663487;756…	+;+;+;+;+;+;+;+;+;+;+;+;+;+;+;+;+;+;+;+;+;+;+;+;+;+;+;+;+;+;+;+;+;+;+;+;+;+;+;+;+;+;+;+;+;+;+;+;+;+;+;+;+;+;+;+;+;+;+;+;+;+;+;+;+;+;+;+;+;+;+;+;+;+;+;+;+;+;+;+;+;+;+;+;+;+;+;+;+;+;+;+;+;+;+;+;+;+;+;+;+;+;+;+;+;+;+;+;+;+;+;+;+;+;+;+;+;+;+;+;+;+;+;+;+;+;+;+;+;+;+;+;+;+;+;+;+;+;+;+;+;+;+;+;+;+;+;+;+;+	20914	2.94038	6.2639	6.42586
Akr1d1	6;6;6;6;6;6;6;6;6;6;6;6;6	37530173;37532482;37536029;37539681;37550206;37550206;37554482;37554482;37557489;37557489;37558369;37564422;37567124	37530337;37532646;37536145;37539874;37550283;37550283;37554604;37554604;37557508;37557598;37558534;37564504;37568815	+;+;+;+;+;+;+;+;+;+;+;+;+	2893	15.2575	73.3776	48.4104
Alas1	9;9;9;9;9;9;9;9;9;9;9;9;9;9;9;9;9;9;9;9;9;9;9;9;9;9;9;9;9;9;9;9;9;9;9;9;9;9;9;9;9;9;9;9;9;9;9;9;9;9;9;9;9;9;9;9;9;9;9;9;9;9;9;9;9;9;9;9;9;9;9;9;9;9;9;9;9;9	106233455;106233458;106233927;106233927;106233942;106234195;106235388;106235388;106235388;106235388;106235388;106235388;106235389;106235438;106236440;106236440;106236440;106236440;106236440;106236440;106236440;106236440;106236678;106237969;106238075;106238075;106238075;106238075;106238075;106238075;106238119;106238643;106238643;106238643;106238643;106238643;106238643;106238643;106238643;106238643…	106234197;106234197;106234197;106234197;106234197;106234197;106235550;106235550;106235550;106235550;106235550;106235550;106235550;106235550;106236708;106236708;106237084;106236708;106236708;106236708;106236708;106236708;106236708;106238239;106238239;106238239;106238236;106238239;106238239;106238239;106238239;106238822;106238760;106238822;106238730;106238822;106238822;106238822;106238822;106238822…	-;-;-;-;-;-;-;-;-;-;-;-;-;-;-;-;-;-;-;-;-;-;-;-;-;-;-;-;-;-;-;-;-;-;-;-;-;-;-;-;-;-;-;-;-;-;-;-;-;-;-;-;-;-;-;-;-;-;-;-;-;-;-;-;-;-;-;-;-;-;-;-;-;-;-;-;-;-	5135	30.3394	87.3766	68.9054
Aldh1a7	19;19;19;19;19;19;19;19;19;19;19;19;19	20692953;20696336;20699898;20702211;20708150;20709398;20714681;20715921;20717696;20719186;20722278;20726958;20727447	20693535;20696410;20700055;20702375;20708334;20709500;20714794;20716049;20717757;20719315;20722418;20727062;20727562	-;-;-;-;-;-;-;-;-;-;-;-;-	2066	20.5835	74.9421	52.9653
Aldh1b1	4;4;4;4	45799022;45799121;45802455;45802463	45799169;45799169;45804604;45802858	+;+;+;+	2298	3.44882	12.3994	8.90519
Aldh3b1	19;19;19;19;19;19;19;19;19;19	3913493;3915294;3918042;3918603;3920797;3921183;3921473;3921697;3923739;3929696	3914084;3915393;3918208;3918989;3920878;3921268;3921593;3921807;3923901;3929761	-;-;-;-;-;-;-;-;-;-	1875	0.313102	0.988937	0.87162
Alpk1	3;3;3;3;3;3;3;3;3;3;3;3;3;3;3;3;3;3;3;3;3;3;3;3;3;3;3;3;3;3;3;3;3;3;3;3;3;3;3;3;3;3;3;3;3;3;3;3;3;3;3	127670310;127670310;127670399;127672360;127672360;127672360;127673320;127673320;127673320;127677686;127677686;127677686;127679361;127679361;127679361;127679520;127681321;127683508;127683508;127683508;127683508;127684342;127684342;127684342;127684342;127685238;127685238;127685238;127686257;127686257;127686257;127687582;127687582;127687582;127695554;127695554;127695554;127724285;127724375;127724375…	127671131;127671131;127671131;127672546;127672546;127672546;127673482;127673482;127673482;127677839;127677839;127677839;127681452;127681452;127681452;127679575;127681452;127683612;127683612;127683612;127683612;127684437;127686343;127684437;127684437;127685314;127685314;127685314;127686340;127686343;127686343;127687641;127687641;127687641;127695752;127695752;127695752;127724529;127724529;127724529…	-;-;-;-;-;-;-;-;-;-;-;-;-;-;-;-;-;-;-;-;-;-;-;-;-;-;-;-;-;-;-;-;-;-;-;-;-;-;-;-;-;-;-;-;-;-;-;-;-;-;-	6868	0.0961632	0.611966	0.237957
Angptl7	4;4;4;4;4	148495183;148496493;148497283;148497988;148499941	148496324;148496691;148497477;148498088;148500460	-;-;-;-;-	2157	0.170105	0.573097	0.922378
Ank2	3;3;3;3;3;3;3;3;3;3;3;3;3;3;3;3;3;3;3;3;3;3;3;3;3;3;3;3;3;3;3;3;3;3;3;3;3;3;3;3;3;3;3;3;3;3;3;3;3;3;3;3;3;3;3;3;3;3;3;3;3;3;3;3;3;3;3;3;3;3;3;3;3;3;3;3;3;3;3;3;3;3;3;3;3;3;3;3;3;3;3;3;3;3;3;3;3;3;3;3;3;3;3;3;3;3;3;3;3;3;3;3;3;3;3;3;3;3;3;3;3;3;3;3;3;3;3;3;3;3;3;3;3;3;3;3;3;3;3;3;3;3;3;3;3;3;3;3;3;3;3;3;3;3;3;3;3;3;3;3;3;3;3;3;3;3;3;3;3;3;3;3;3;3;3;3;3;3;3;3;3;3;3;3;3;3;3;3;3;3;3;3;3;3;3;3;3;3;3;3…	126921612;126921614;126921614;126923325;126923912;126923913;126925587;126926803;126926803;126928665;126928665;126928665;126929722;126929722;126929722;126929722;126929722;126929998;126929998;126929998;126932938;126932938;126932938;126933196;126934526;126934526;126934526;126934526;126936620;126936620;126936620;126937738;126937738;126937738;126937767;126940072;126940072;126940072;126940072;126940112…	126923971;126923971;126923972;126923971;126923971;126923971;126928367;126926894;126926894;126928847;126928847;126928847;126929812;126929812;126929886;126929886;126929886;126930081;126930081;126930081;126933226;126933226;126933226;126933226;126935117;126934778;126934778;126934778;126936763;126936763;126936763;126937869;126937869;126937869;126937869;126940146;126940146;126940146;126940146;126940146…	-;-;-;-;-;-;-;-;-;-;-;-;-;-;-;-;-;-;-;-;-;-;-;-;-;-;-;-;-;-;-;-;-;-;-;-;-;-;-;-;-;-;-;-;-;-;-;-;-;-;-;-;-;-;-;-;-;-;-;-;-;-;-;-;-;-;-;-;-;-;-;-;-;-;-;-;-;-;-;-;-;-;-;-;-;-;-;-;-;-;-;-;-;-;-;-;-;-;-;-;-;-;-;-;-;-;-;-;-;-;-;-;-;-;-;-;-;-;-;-;-;-;-;-;-;-;-;-;-;-;-;-;-;-;-;-;-;-;-;-;-;-;-;-;-;-;-;-;-;-;-;-;-;-;-;-;-;-;-;-;-;-;-;-;-;-;-;-;-;-;-;-;-;-;-;-;-;-;-;-;-;-;-;-;-;-;-;-;-;-;-;-;-;-;-;-;-;-;-;-…	35004	0.0188678	0.0688645	0.0487186
Ap3s1-ps2	8	94405211	94405789	+	579	1.77438	15.9774	11.3923
Apcs	1;1	172893961;172894821	172894710;172895041	-;-	971	37.7874	116.933	77.4957
Apobec1	6;6;6;6;6;6;6;6;6;6;6;6;6;6;6;6;6;6;6;6;6;6;6;6;6;6;6;6;6;6;6;6;6;6;6;6;6;6;6;6;6;6;6;6;6;6;6;6;6;6	122577792;122577799;122577801;122580688;122580688;122580688;122581353;122581353;122581353;122581430;122581456;122581638;122587322;122588053;122588145;122588145;122588145;122588145;122588145;122588145;122591087;122591087;122591087;122591087;122591087;122591087;122591087;122591087;122596632;122596632;122596632;122596632;122596632;122596639;122600058;122600058;122600058;122600058;122600058;122600058…	122578935;122578935;122578935;122580806;122580806;122580806;122581750;122581750;122581750;122581750;122581750;122581750;122587353;122588172;122588172;122588172;122588172;122588172;122588172;122588172;122591204;122591204;122591204;122591204;122591204;122591204;122591260;122591260;122596777;122596777;122596777;122596777;122596777;122596777;122600438;122600125;122600125;122600125;122600125;122600125…	-;-;-;-;-;-;-;-;-;-;-;-;-;-;-;-;-;-;-;-;-;-;-;-;-;-;-;-;-;-;-;-;-;-;-;-;-;-;-;-;-;-;-;-;-;-;-;-;-;-	2702	4.77996	13.0503	11.1239
Aqp8	7;7;7;7;7;7;7;7;7;7;7;7;7;7;7;7;7	123462291;123462312;123462571;123462574;123463751;123464189;123464189;123464189;123465109;123465109;123465109;123466586;123466586;123466586;123467408;123467408;123467408	123462458;123462458;123462818;123462818;123463841;123464315;123464315;123464315;123465323;123465323;123465323;123466720;123466720;123466720;123467998;123467986;123468004	+;+;+;+;+;+;+;+;+;+;+;+;+;+;+;+;+	1581	5.0129	18.8045	13.0337
Arhgap10	8;8;8;8;8;8;8;8;8;8;8;8;8;8;8;8;8;8;8;8;8;8;8;8;8;8;8;8;8;8;8;8;8;8;8;8;8;8;8;8;8;8;8;8;8;8;8;8;8;8;8;8;8;8;8;8;8;8;8;8;8;8;8;8;8;8;8	77250366;77250919;77250919;77257326;77257326;77257326;77259057;77259057;77277148;77277148;77277148;77310731;77310731;77310731;77344640;77344640;77344640;77346272;77346272;77346272;77351614;77351614;77351614;77358547;77358547;77358547;77365086;77365086;77365086;77382725;77382725;77384751;77384751;77384751;77388654;77388654;77388654;77409548;77409548;77409548;77411022;77411022;77411022;77413498;774…	77251007;77251007;77251007;77257417;77257417;77257417;77259209;77259209;77277307;77277307;77277307;77310881;77310881;77310881;77344799;77344799;77344799;77346377;77346377;77346377;77351672;77351672;77351672;77358634;77358634;77358634;77365160;77365160;77365160;77382790;77382790;77384796;77384796;77384796;77388735;77388735;77388735;77409642;77409642;77409642;77411128;77411128;77411128;77413627;774…	-;-;-;-;-;-;-;-;-;-;-;-;-;-;-;-;-;-;-;-;-;-;-;-;-;-;-;-;-;-;-;-;-;-;-;-;-;-;-;-;-;-;-;-;-;-;-;-;-;-;-;-;-;-;-;-;-;-;-;-;-;-;-;-;-;-;-	3084	0.166564	0.941959	0.529925
Arhgap26	18;18;18;18;18;18;18;18;18;18;18;18;18;18;18;18;18;18;18;18;18;18;18;18;18;18;18;18;18;18;18;18;18;18;18;18;18;18;18;18;18;18;18;18;18;18;18;18;18;18;18;18;18;18;18;18;18;18;18;18;18;18;18;18;18;18;18;18;18;18;18;18;18;18;18;18;18;18;18;18;18;18;18;18;18;18;18;18;18;18;18;18;18;18;18;18;18;18;18;18;18;18;18;18;18;18;18;18;18;18;18;18;18;18;18;18;18;18;18;18	38601534;38601603;38617610;38617610;38627287;38628961;38642385;38642385;38676718;38676718;38676718;38707986;38775498;38788626;38892458;38892685;38892717;38899809;38899809;38933793;38933793;38933793;38955709;38969547;38970484;38993145;38993145;38993476;39097630;39097630;39097630;39097630;39099311;39099572;39099572;39099572;39099572;39099572;39102169;39102169;39102169;39102169;39110455;39110455;391…	38601697;38601697;38617774;38617774;38627375;38629062;38642930;38645922;38676805;38676805;38676805;38708094;38775996;38789045;38892570;38892765;38892765;38899899;38899899;38933964;38933964;38933964;38955959;38971272;38970935;38993629;38993629;38993629;39097725;39097725;39097725;39097725;39099402;39099633;39099633;39100149;39099633;39099633;39102240;39102240;39102240;39102240;39110556;39110556;391…	+;+;+;+;+;+;+;+;+;+;+;+;+;+;+;+;+;+;+;+;+;+;+;+;+;+;+;+;+;+;+;+;+;+;+;+;+;+;+;+;+;+;+;+;+;+;+;+;+;+;+;+;+;+;+;+;+;+;+;+;+;+;+;+;+;+;+;+;+;+;+;+;+;+;+;+;+;+;+;+;+;+;+;+;+;+;+;+;+;+;+;+;+;+;+;+;+;+;+;+;+;+;+;+;+;+;+;+;+;+;+;+;+;+;+;+;+;+;+;+	17331	0.755808	2.16121	1.78962
Arhgap30	1;1;1;1;1;1;1;1;1;1;1;1;1;1;1;1;1;1;1;1;1;1;1;1;1;1;1;1;1;1;1;1;1;1	171388954;171388954;171388954;171388999;171397475;171397475;171397475;171400556;171400556;171400556;171401925;171401925;171401925;171402157;171402157;171402157;171403213;171403213;171403213;171403781;171403781;171404034;171404034;171404034;171404221;171404221;171404810;171404810;171404810;171407358;171407358;171407358;171407728;171407728	171389363;171389363;171389363;171392787;171397577;171397577;171397577;171400700;171400700;171400700;171402007;171402007;171402007;171402264;171402264;171402264;171403340;171403955;171403340;171403955;171403955;171404137;171404298;171404137;171404298;171404298;171405178;171405178;171405178;171410298;171407635;171407635;171410240;171410240	+;+;+;+;+;+;+;+;+;+;+;+;+;+;+;+;+;+;+;+;+;+;+;+;+;+;+;+;+;+;+;+;+;+	8591	0.815749	3.13503	2.03466
Arhgef26	3;3;3;3;3;3;3;3;3;3;3;3;3;3;3;3;3;3;3;3;3;3;3;3;3;3;3;3;3;3;3;3;3;3;3;3	62338344;62338999;62340390;62341101;62341344;62341344;62341344;62345146;62345146;62345146;62345146;62377588;62377588;62377588;62377588;62378701;62380831;62380831;62419549;62419668;62423501;62423501;62426589;62426589;62427180;62428881;62428881;62432488;62432488;62448093;62448093;62458373;62458373;62459610;62460204;62460204	62340573;62340573;62340573;62341383;62341383;62341383;62341383;62345291;62345291;62345291;62345291;62377644;62377644;62378118;62377644;62379719;62380991;62380991;62419701;62419701;62423630;62423630;62426663;62426663;62430011;62428970;62428970;62432642;62432642;62448302;62448302;62458440;62458440;62459714;62460212;62462221	+;+;+;+;+;+;+;+;+;+;+;+;+;+;+;+;+;+;+;+;+;+;+;+;+;+;+;+;+;+;+;+;+;+;+;+	10116	5.29555	16.0937	11.7514
Arid5b	10;10;10;10;10;10;10;10;10;10	68095593;68101895;68118251;68126699;68128789;68134994;68186026;68243004;68277930;68278690	68098669;68102093;68118348;68126751;68128993;68135106;68186256;68243229;68278184;68278726	-;-;-;-;-;-;-;-;-;-	4494	6.87457	14.9226	14.9101
Arl4c	1;1;1;1;1;1;1	88673125;88673127;88674566;88674566;88698225;88700630;88700630	88674468;88674468;88674716;88674716;88702221;88701876;88701876	-;-;-;-;-;-;-	5492	0.160342	0.742783	0.575745
Arpin	7;7;7;7;7;7	79925361;79927626;79928172;79929573;79931803;79935153	79926850;79927789;79928378;79929705;79931878;79935359	-;-;-;-;-;-	2277	1.38581	2.95878	3.1518
Atp2a1	7;7;7;7;7;7;7;7;7;7;7;7;7;7;7;7;7;7;7;7;7;7;7;7;7;7;7;7	126445858;126445860;126446545;126446871;126446871;126447137;126447137;126447383;126447383;126447602;126447602;126447861;126448162;126448537;126450105;126450425;126452655;126453023;126453362;126456377;126456720;126457114;126457908;126459579;126460697;126462105;126462500;126462805	126446126;126446126;126446586;126446988;126446988;126447254;126447254;126447516;126447516;126447645;126447687;126448063;126448382;126448872;126450323;126450550;126452786;126453125;126453450;126456543;126457017;126457199;126457988;126459717;126460801;126462187;126462517;126463108	-;-;-;-;-;-;-;-;-;-;-;-;-;-;-;-;-;-;-;-;-;-;-;-;-;-;-;-	3477	0.126632	0.497739	3.31063
Atp6v0d2	4;4;4;4;4;4;4;4;4;4;4	19876841;19880005;19881276;19887308;19888744;19890678;19890832;19910587;19910587;19916764;19922368	19878380;19880079;19881452;19887385;19888823;19890856;19890856;19910758;19910758;19916940;19922605	-;-;-;-;-;-;-;-;-;-;-	2716	0.0810566	1.16062	0.994156
Atp8b2	3;3;3;3;3;3;3;3;3;3;3;3;3;3;3;3;3;3;3;3;3;3;3;3;3;3;3;3;3;3;3;3;3;3;3;3;3;3;3;3;3;3;3;3;3;3;3;3;3;3;3;3;3;3;3;3;3;3;3;3;3;3;3;3;3;3;3;3;3;3;3;3;3;3;3;3;3;3;3;3;3;3;3;3;3;3;3;3;3;3;3;3;3;3;3;3;3;3;3;3;3;3;3;3;3;3;3;3;3;3;3;3;3;3;3;3;3;3;3;3;3;3;3;3;3;3;3;3;3;3;3;3;3;3;3;3;3;3;3;3;3;3;3;3;3;3;3;3;3;3;3;3;3;3;3;3;3;3;3;3;3;3;3;3;3;3;3;3;3;3;3;3;3;3;3;3;3	89939481;89939481;89939489;89940156;89940849;89941197;89941675;89941675;89941675;89941675;89941675;89943330;89943330;89943330;89943330;89943330;89943330;89943614;89943614;89943614;89943614;89943614;89943614;89943714;89944109;89944109;89944109;89944109;89944109;89944109;89944997;89944997;89944997;89944997;89944997;89944997;89945188;89945482;89945482;89945482;89945482;89945482;89945482;89945482;899…	89941431;89941431;89941431;89941431;89941431;89941431;89941805;89941805;89941805;89941805;89941805;89943468;89943468;89943468;89943468;89943468;89943468;89943757;89943859;89943859;89943859;89943859;89943859;89943859;89944192;89944192;89944192;89944192;89944192;89944192;89945220;89945220;89945220;89945220;89945220;89945220;89945220;89945763;89945665;89945665;89945665;89945665;89945665;89945665;899…	-;-;-;-;-;-;-;-;-;-;-;-;-;-;-;-;-;-;-;-;-;-;-;-;-;-;-;-;-;-;-;-;-;-;-;-;-;-;-;-;-;-;-;-;-;-;-;-;-;-;-;-;-;-;-;-;-;-;-;-;-;-;-;-;-;-;-;-;-;-;-;-;-;-;-;-;-;-;-;-;-;-;-;-;-;-;-;-;-;-;-;-;-;-;-;-;-;-;-;-;-;-;-;-;-;-;-;-;-;-;-;-;-;-;-;-;-;-;-;-;-;-;-;-;-;-;-;-;-;-;-;-;-;-;-;-;-;-;-;-;-;-;-;-;-;-;-;-;-;-;-;-;-;-;-;-;-;-;-;-;-;-;-;-;-;-;-;-;-;-;-;-;-;-;-;-;-	8561	0.0771462	0.252692	0.315399
Axl	7;7;7;7;7;7;7;7;7;7;7;7;7;7;7;7;7;7;7;7;7;7;7;7;7;7;7;7;7;7;7;7;7;7;7;7;7;7;7;7;7;7;7;7;7;7;7;7;7;7;7;7;7;7;7;7;7;7;7;7;7;7;7;7;7;7;7;7;7;7;7	25757273;25757630;25760678;25760751;25760751;25761369;25761405;25761405;25761405;25763284;25763284;25763284;25763284;25763794;25763943;25763943;25763943;25763943;25764422;25764422;25766518;25766518;25766518;25766518;25766793;25766793;25766793;25766793;25770218;25770218;25770218;25770218;25770633;25770633;25770633;25770633;25773099;25773343;25773343;25773343;25774084;25774084;25774084;25774515;257…	25759013;25759013;25760887;25760887;25760887;25761564;25761564;25761564;25761564;25763393;25763393;25763393;25763393;25764514;25764413;25764064;25764064;25764064;25764514;25764514;25766595;25766595;25766595;25766595;25766888;25766888;25766888;25766888;25770309;25770309;25770309;25770309;25770765;25770765;25770765;25770765;25773125;25773493;25773493;25773493;25774223;25774223;25774223;25774678;257…	-;-;-;-;-;-;-;-;-;-;-;-;-;-;-;-;-;-;-;-;-;-;-;-;-;-;-;-;-;-;-;-;-;-;-;-;-;-;-;-;-;-;-;-;-;-;-;-;-;-;-;-;-;-;-;-;-;-;-;-;-;-;-;-;-;-;-;-;-;-;-	5033	1.29766	7.29471	3.65657
B3galt1	2;2;2;2;2;2;2;2;2;2;2	67565871;67748160;67748212;67810719;67877828;67981743;68073449;68104671;68117713;68117713;68117713	67566034;67748263;67748304;67810894;67877892;67981790;68073573;68104723;68118150;68120514;68122689	+;+;+;+;+;+;+;+;+;+;+	5753	2.59577	6.31193	5.47155
B430306N03Rik	17;17;17;17;17;17;17;17;17;17;17;17;17;17;17;17;17;17;17;17;17;17	48316141;48316165;48316409;48316424;48316731;48316731;48316731;48316731;48318378;48319151;48319151;48319151;48319590;48320978;48320978;48322411;48322411;48322411;48323937;48323937;48323937;48325468	48316485;48316485;48316485;48316485;48318211;48317042;48317042;48317042;48318468;48319214;48319507;48319214;48321105;48321105;48321105;48322469;48322469;48322469;48324199;48325301;48327024;48325525	+;+;+;+;+;+;+;+;+;+;+;+;+;+;+;+;+;+;+;+;+;+	6937	0.0423141	0.494504	0.686284
B4galt5	2;2;2;2;2;2;2;2;2;2;2;2;2;2;2;2;2;2;2;2	167298444;167301200;167302010;167302010;167304996;167305660;167305660;167306591;167307544;167307610;167307610;167309223;167309223;167309223;167313087;167313087;167313087;167313803;167313848;167348918	167301483;167301483;167302111;167302111;167305118;167305698;167305847;167306707;167307668;167307668;167307668;167309336;167309336;167309336;167313221;167313221;167313221;167313855;167313900;167349183	-;-;-;-;-;-;-;-;-;-;-;-;-;-;-;-;-;-;-;-	4308	6.24302	19.3091	16.0788
BC089597	10;10;10;10	127866474;127874829;127876251;127876874	127866868;127875090;127876414;127877317	+;+;+;+	1265	10.5869	89.6019	46.6122
BE692007	19;19;19;19;19;19;19	11470166;11476785;11480087;11480205;11480279;11484447;11484447	11470943;11476829;11480125;11484535;11480469;11484578;11484577	-;-;-;-;-;-;-	5236	0.0560605	1.02404	0.481759
Bag3	7;7;7;7	128523616;128539973;128541807;128545590	128524044;128540311;128542208;128546981	+;+;+;+	2562	14.4933	42.8703	30.3
Banp	8;8;8;8;8;8;8;8;8;8;8;8;8;8;8;8;8;8;8;8;8;8;8;8;8;8;8;8;8;8;8;8;8;8;8;8;8;8;8;8;8;8;8;8;8;8;8;8;8;8;8;8;8;8;8;8;8;8;8;8;8;8;8;8;8;8;8;8;8;8;8;8;8;8;8;8;8;8;8;8;8;8;8;8;8;8;8;8;8;8;8;8;8;8;8;8;8;8;8;8;8;8;8;8;8;8;8;8;8;8;8;8;8	121949750;121950492;121950544;121950575;121950580;121950585;121950596;121950605;121969784;121973843;121974427;121974427;121974427;121974427;121974427;121974427;121974427;121974427;121974448;121974496;121975900;121975900;121975900;121975900;121975900;121975900;121975900;121975900;121975900;121975900;121978322;121978555;121978555;121978555;121978555;121978555;121978555;121978579;121978602;121978602…	121949847;121950648;121950648;121950648;121950648;121950648;121950648;121950648;121969788;121973885;121974565;121974565;121974565;121974565;121974565;121974565;121974565;121974565;121974565;121974565;121975991;121975991;121976487;121975991;121975991;121975991;121975991;121975991;121975991;121975991;121978754;121978754;121978754;121978754;121978754;121978754;121978754;121978754;121978754;121978754…	+;+;+;+;+;+;+;+;+;+;+;+;+;+;+;+;+;+;+;+;+;+;+;+;+;+;+;+;+;+;+;+;+;+;+;+;+;+;+;+;+;+;+;+;+;+;+;+;+;+;+;+;+;+;+;+;+;+;+;+;+;+;+;+;+;+;+;+;+;+;+;+;+;+;+;+;+;+;+;+;+;+;+;+;+;+;+;+;+;+;+;+;+;+;+;+;+;+;+;+;+;+;+;+;+;+;+;+;+;+;+;+;+	6632	1.3278	3.54616	2.79638
Basp1	15;15	25363285;25413552	25364918;25413764	-;-	1847	0.715159	2.44289	1.4619
Bcl2	1;1;1	106538178;106710339;106712305	106543398;106713179;106714274	-;-;-	9157	0.14425	0.388118	0.349189
Bmf	2;2;2;2;2;2;2;2;2;2;2;2;2;2;2;2;2;2;2;2;2;2;2;2	118528757;118530232;118531974;118532055;118532422;118544369;118545082;118545082;118545082;118545184;118545236;118546716;118546716;118546716;118546716;118546909;118547294;118547371;118547496;118549041;118549041;118549540;118549540;118549540	118532659;118532659;118532659;118532659;118532659;118544587;118545316;118545245;118545245;118545245;118545245;118547027;118547012;118547012;118547012;118547012;118547370;118547559;118547599;118549170;118549170;118549675;118549662;118549687	-;-;-;-;-;-;-;-;-;-;-;-;-;-;-;-;-;-;-;-;-;-;-;-	5253	0.61467	1.35313	1.60968
Brca1	11;11;11;11;11;11;11;11;11;11;11;11;11;11;11;11;11;11;11;11;11;11;11;11;11;11;11;11;11;11;11;11;11;11;11;11;11;11;11;11;11;11;11;11;11;11;11;11;11	101488764;101491859;101492181;101493552;101496315;101497934;101501992;101501992;101502481;101502481;101505317;101505317;101507950;101507950;101509921;101512511;101512720;101517271;101517271;101522432;101522432;101523325;101524193;101524207;101524546;101524546;101525507;101528001;101528001;101529791;101529791;101530992;101530992;101532020;101532020;101532083;101533939;101533939;101535528;101535528…	101489912;101491919;101492254;101493606;101498014;101498014;101502032;101502032;101502558;101502558;101505404;101505404;101508178;101508230;101510099;101512849;101512849;101517442;101517442;101522459;101522502;101526639;101524410;101524397;101524858;101525206;101526639;101528077;101528077;101529836;101529836;101531094;101531094;101532159;101532159;101532159;101534027;101534027;101535605;101535605…	-;-;-;-;-;-;-;-;-;-;-;-;-;-;-;-;-;-;-;-;-;-;-;-;-;-;-;-;-;-;-;-;-;-;-;-;-;-;-;-;-;-;-;-;-;-;-;-;-	8533	0.146199	0.318713	0.41636
C1qa	4;4;4	136895917;136897675;136898746	136896728;136897844;136898803	-;-;-	1040	12.6304	54.974	28.8665
C1qb	4;4;4	136880129;136882127;136886043	136880869;136882328;136886187	-;-;-	1088	2.56302	18.5198	9.33916
C1qc	4;4;4;4;4	136889804;136891651;136892379;136892844;136892844	136890599;136892563;136892563;136893065;136892876	-;-;-;-;-	1931	2.62219	17.3647	8.46343
C3ar1	6;6	122847138;122855984	122851264;122856161	-;-	4305	0.153414	0.588653	0.54468
C730036E19Rik	1;1;1;1;1	151138034;151138904;151139702;151141527;151142202	151138634;151139029;151139753;151141705;151142345	+;+;+;+;+	1102	0.199773	8.69358	1.16062
Camk2b	11;11;11;11;11;11;11;11;11;11;11;11;11;11;11;11;11;11;11;11;11;11;11;11;11;11;11;11;11;11;11;11;11;11;11;11;11;11;11;11;11;11;11;11;11;11;11;11;11;11;11;11;11;11;11;11;11;11;11;11;11;11;11;11;11;11;11;11;11;11;11;11;11;11;11;11;11;11;11;11;11;11;11;11;11;11;11;11;11;11;11;11;11;11;11;11;11;11;11;11;11;11;11;11;11;11;11;11;11;11;11;11;11;11;11;11;11;11;11;11;11;11;11;11;11;11;11;11;11;11;11;11;11;…	5969644;5969668;5969672;5969672;5970162;5971568;5971669;5971672;5971672;5971680;5971735;5972217;5972217;5972217;5972217;5972217;5972217;5972217;5972217;5972217;5972217;5972217;5972632;5972632;5972632;5972632;5972632;5972632;5972632;5972632;5972632;5972632;5972632;5972813;5972813;5972813;5972813;5972813;5972813;5972813;5972813;5972813;5972813;5976765;5976765;5976765;5977812;5977812;5978399;5979673…	5971826;5971826;5971826;5970131;5971826;5971826;5971826;5971826;5971826;5971826;5971826;5972450;5972450;5972450;5972450;5972450;5972450;5972450;5972450;5972450;5972450;5972450;5972726;5972726;5972726;5972726;5972726;5972726;5972726;5972726;5972726;5972888;5972726;5972888;5972888;5972888;5972888;5972888;5972888;5972888;5972888;5972888;5972888;5976893;5976893;5976893;5977940;5977940;5978512;5979721…	-;-;-;-;-;-;-;-;-;-;-;-;-;-;-;-;-;-;-;-;-;-;-;-;-;-;-;-;-;-;-;-;-;-;-;-;-;-;-;-;-;-;-;-;-;-;-;-;-;-;-;-;-;-;-;-;-;-;-;-;-;-;-;-;-;-;-;-;-;-;-;-;-;-;-;-;-;-;-;-;-;-;-;-;-;-;-;-;-;-;-;-;-;-;-;-;-;-;-;-;-;-;-;-;-;-;-;-;-;-;-;-;-;-;-;-;-;-;-;-;-;-;-;-;-;-;-;-;-;-;-;-;-;-;-;-;-;-;-;-;-;-;-;-;-;-;-;-;-;-;-;-;-;-;-;-;-;-;-;-;-;-;-;-;-;-;-;-;-;-;-;-;-;-;-;-;-;-;-;-;-;-;-;-;-;-;-;-;-;-;-;-;-;-;-;-;-;-;-;-…	9125	0.008042	0.304809	0.147952
Camk4	18;18;18;18;18;18;18;18;18;18;18	32939041;33077993;33107880;33109765;33129761;33156749;33158827;33176159;33179498;33182238;33184761	32939544;33078071;33107942;33109847;33129833;33156839;33158901;33176234;33179624;33182390;33195767	+;+;+;+;+;+;+;+;+;+;+	12331	0.0833156	0.210523	0.311169
Ccdc148	2;2;2;2;2;2;2;2;2;2;2;2;2;2;2;2;2;2;2;2;2	58821697;58823430;58827553;58829750;58829750;58906355;58906355;58921046;58934369;58980370;58982869;59001814;59002073;59003323;59003982;59009082;59017544;59018543;59158825;59160347;59160347	58823700;58827693;58827693;58829867;58829867;58906473;58906473;58921092;58934509;58980576;58983007;59001995;59002168;59003471;59004064;59009185;59017637;59018605;59160222;59160534;59160683	-;-;-;-;-;-;-;-;-;-;-;-;-;-;-;-;-;-;-;-;-	9274	0.181994	0.493189	0.421402
Ccdc151	9;9;9;9;9;9;9;9;9;9;9;9;9;9;9;9;9;9;9;9;9;9;9;9;9;9;9;9;9	21989871;21989871;21990397;21990397;21990802;21990802;21991608;21991608;21991848;21991848;21992872;21992872;21993538;21993538;21994813;21994813;21995027;21995027;21995208;21995208;21997572;21997886;21997886;21998045;21998045;21998045;22002246;22002246;22002246	21990244;21990244;21990481;21990481;21990957;21990957;21991764;21991764;21992008;21992008;21993024;21993027;21993660;21993660;21994938;21994938;21995128;21995128;21995378;21995378;21997963;21997963;21997963;21998166;21998166;21998166;22002634;22002634;22002537	-;-;-;-;-;-;-;-;-;-;-;-;-;-;-;-;-;-;-;-;-;-;-;-;-;-;-;-;-	2514	0.145949	0.712987	0.537018
Ccdc88b	19;19;19;19;19;19;19;19;19;19;19;19;19;19;19;19;19;19;19;19;19;19;19;19;19;19;19	6844623;6846347;6846563;6847277;6847636;6847934;6848182;6848541;6848975;6849684;6849902;6850256;6850445;6852942;6854188;6854479;6854742;6855356;6855652;6855842;6856109;6856927;6857099;6857237;6857384;6857634;6858080	6845119;6846415;6846769;6847443;6847734;6848079;6848368;6848684;6849231;6849824;6849997;6850373;6850572;6854102;6854324;6854587;6854888;6855514;6855733;6855990;6856252;6857010;6857157;6857306;6857495;6857791;6858211	-;-;-;-;-;-;-;-;-;-;-;-;-;-;-;-;-;-;-;-;-;-;-;-;-;-;-	4959	0.133182	0.535948	0.401204
Ccdc88c	12;12;12;12;12;12;12;12;12;12;12;12;12;12;12;12;12;12;12;12;12;12;12;12;12;12;12;12;12;12;12;12;12;12;12;12;12;12;12;12;12;12;12;12;12;12;12;12;12;12;12;12;12;12;12;12;12;12;12;12	100912700;100912700;100916578;100916578;100918329;100918329;100921527;100921527;100923180;100923180;100928827;100928827;100930515;100930515;100931768;100931768;100933159;100933159;100935626;100935626;100937830;100937830;100938997;100938997;100940085;100940085;100941109;100941109;100941997;100941997;100944847;100944847;100947100;100947100;100948447;100948447;100953287;100953287;100954164;100954164…	100913805;100913805;100916870;100916870;100918397;100918397;100921595;100921595;100923368;100923368;100929065;100929065;100930604;100930604;100931913;100931913;100933345;100933345;100935769;100935769;100938107;100938107;100939158;100939158;100940270;100940270;100941235;100941235;100942124;100942124;100945908;100945908;100947237;100947258;100948631;100948631;100953431;100953431;100954310;100954310…	-;-;-;-;-;-;-;-;-;-;-;-;-;-;-;-;-;-;-;-;-;-;-;-;-;-;-;-;-;-;-;-;-;-;-;-;-;-;-;-;-;-;-;-;-;-;-;-;-;-;-;-;-;-;-;-;-;-;-;-	6313	0.267355	0.597231	0.562775
Ccl6	11;11;11;11;11;11;11;11;11	83587882;83588395;83589303;83589303;83589473;83589757;83589757;83592866;83592866	83588939;83588939;83589414;83589414;83589804;83589875;83589804;83593087;83592975	-;-;-;-;-;-;-;-;-	1795	1.2469	5.02733	3.04809
Ccr3	9;9	124021972;124028619	124022172;124031689	+;+	3272	0.291559	0.982288	0.792648
Cd14	18;18	36725074;36726489	36726397;36726736	-;-	1572	0.513496	1.69069	1.71764
Cd163	6;6;6;6;6;6;6;6;6;6;6;6;6;6;6;6;6;6;6;6;6;6;6;6;6;6;6;6;6;6;6;6;6;6;6;6;6;6;6;6	124304656;124304700;124305797;124305797;124307001;124307001;124308944;124308944;124311387;124311387;124312421;124312421;124317302;124317302;124317711;124317711;124318654;124318654;124318842;124318842;124320355;124320355;124320487;124325261;124325261;124325261;124326116;124326116;124326116;124326501;124326501;124326501;124327898;124327898;124327898;124328962;124329045;124329583;124329583;124329583	124304785;124304785;124305880;124305880;124307321;124307321;124309267;124309267;124311707;124311707;124312741;124312741;124317616;124317616;124318025;124318025;124318749;124318749;124319156;124319156;124320678;124320678;124320678;124325572;124325572;124325572;124326145;124326145;124326145;124326608;124326608;124326608;124329097;124327987;124327987;124329097;124329097;124330527;124330519;124330527	+;+;+;+;+;+;+;+;+;+;+;+;+;+;+;+;+;+;+;+;+;+;+;+;+;+;+;+;+;+;+;+;+;+;+;+;+;+;+;+	5461	1.54533	5.92507	5.57544
Cd274	19;19;19;19;19;19;19	29367455;29372454;29373558;29380304;29382476;29384084;29385390	29367506;29372519;29373899;29380588;29382586;29384143;29388095	+;+;+;+;+;+;+	3622	0.628073	1.53583	1.82446
Cd300a	11;11;11;11;11;11;11;11;11;11;11;11;11;11;11;11;11	114890041;114890041;114890294;114891742;114893238;114893238;114893238;114894658;114894670;114897722;114897722;114899345;114899345;114899753;114899753;114901129;114901129	114890434;114890434;114890434;114891834;114893470;114893594;114893594;114894778;114894778;114897819;114897819;114899382;114899382;114899863;114899863;114904654;114904654	+;+;+;+;+;+;+;+;+;+;+;+;+;+;+;+;+	4738	0.201347	0.717491	0.464909
Cd300e	11;11;11;11	115051917;115054476;115055246;115061985	115053360;115054578;115055593;115062177	-;-;-;-	2088	0.246017	2.48655	1.6675
Cd300ld	11;11;11;11	114982274;114986095;114987303;114989771	114984297;114986221;114987644;114989922	-;-;-;-	2645	1.74233	9.52272	4.14113
Cd33	7;7;7;7;7;7;7;7;7;7;7;7;7;7;7;7;7;7;7;7;7;7;7;7;7;7;7;7;7;7	43524216;43527995;43528374;43528526;43529473;43529866;43529866;43529866;43530212;43530212;43530212;43530212;43530352;43532038;43532038;43532038;43532038;43532039;43532602;43532602;43532602;43532602;43532602;43532831;43533058;43533058;43533058;43533058;43533365;43544300	43529008;43529008;43529008;43529008;43529555;43529932;43529932;43529932;43530305;43530305;43530305;43530305;43532316;43532316;43532316;43532316;43532316;43532316;43532982;43532678;43532982;43532982;43532982;43532954;43533087;43533118;43533101;43533171;43533509;43544428	-;-;-;-;-;-;-;-;-;-;-;-;-;-;-;-;-;-;-;-;-;-;-;-;-;-;-;-;-;-	7771	0.141648	0.373826	0.402325
Cd34	1;1;1;1;1;1;1;1;1;1;1;1;1;1;1;1;1;1;1;1;1;1;1;1	194938819;194938875;194938905;194938951;194938995;194947839;194947839;194947839;194947839;194949305;194949305;194949382;194950939;194950939;194950939;194958417;194958417;194958417;194958810;194958810;194959066;194959066;194959780;194959936	194939044;194939044;194939044;194941229;194939044;194948006;194950761;194948006;194948006;194949564;194949564;194949564;194951019;194951019;194951019;194958550;194958573;194958573;194958862;194958862;194959230;194959230;194961279;194961279	+;+;+;+;+;+;+;+;+;+;+;+;+;+;+;+;+;+;+;+;+;+;+;+	7290	0.110729	0.262835	0.243676
Cd36	5;5;5;5;5;5;5;5;5;5;5;5;5;5;5;5;5;5;5;5;5;5;5;5;5;5;5;5;5;5;5;5;5;5;5;5;5;5;5;5;5;5;5;5;5;5;5;5;5;5;5;5;5;5;5;5;5;5;5;5;5;5;5;5;5;5;5;5;5;5;5;5;5;5;5;5;5;5;5;5;5;5	17781690;17782016;17782367;17782369;17782486;17785722;17785722;17785722;17785722;17785722;17787686;17787686;17787686;17787686;17787686;17788252;17788252;17788252;17788252;17788252;17795579;17795579;17795579;17795579;17795579;17796996;17796996;17796996;17796996;17796996;17798229;17798229;17798229;17798229;17798229;17811181;17811181;17811181;17811181;17811181;17813013;17813013;17813013;17813013;178…	17783349;17783349;17783349;17783349;17783349;17785886;17785886;17785886;17785886;17785886;17787740;17787740;17787740;17787740;17787740;17788325;17788325;17788325;17788325;17788325;17795697;17795697;17795697;17795697;17795697;17797183;17797183;17797183;17797183;17797183;17798298;17798298;17798298;17798298;17798298;17811227;17811227;17811227;17811227;17811227;17813104;17813104;17813104;17813104;178…	-;-;-;-;-;-;-;-;-;-;-;-;-;-;-;-;-;-;-;-;-;-;-;-;-;-;-;-;-;-;-;-;-;-;-;-;-;-;-;-;-;-;-;-;-;-;-;-;-;-;-;-;-;-;-;-;-;-;-;-;-;-;-;-;-;-;-;-;-;-;-;-;-;-;-;-;-;-;-;-;-;-	3590	3.15303	34.2616	11.7371
Cd44	2;2;2;2;2;2;2;2;2;2;2;2;2;2;2;2;2;2;2;2;2;2;2;2;2;2;2;2;2;2;2;2;2;2;2;2;2;2;2;2;2;2;2;2;2;2;2;2;2;2;2;2;2;2;2;2;2;2;2;2;2;2;2;2;2;2;2;2;2;2;2;2;2;2;2;2;2;2;2;2;2;2;2;2;2;2;2;2;2;2;2;2;2;2;2;2;2;2;2;2;2;2;2;2;2;2;2;2;2;2	102811141;102811141;102812530;102812547;102814120;102814120;102814130;102814133;102822208;102822208;102822208;102822208;102822208;102822208;102822208;102822208;102824261;102824261;102824261;102824261;102824261;102824261;102824261;102824261;102828542;102828542;102828542;102828542;102828542;102828542;102828542;102828542;102831330;102831330;102831330;102831330;102831330;102831330;102831330;102832483…	102814337;102814337;102814337;102814337;102814337;102814337;102814337;102814337;102822286;102822286;102822286;102822286;102822286;102822286;102822286;102822286;102824332;102824332;102824332;102824332;102824332;102824332;102824332;102824332;102828610;102828610;102828610;102828610;102828610;102828610;102828610;102828610;102831536;102831536;102831536;102831536;102831536;102831536;102831536;102832572…	-;-;-;-;-;-;-;-;-;-;-;-;-;-;-;-;-;-;-;-;-;-;-;-;-;-;-;-;-;-;-;-;-;-;-;-;-;-;-;-;-;-;-;-;-;-;-;-;-;-;-;-;-;-;-;-;-;-;-;-;-;-;-;-;-;-;-;-;-;-;-;-;-;-;-;-;-;-;-;-;-;-;-;-;-;-;-;-;-;-;-;-;-;-;-;-;-;-;-;-;-;-;-;-;-;-;-;-;-;-	6776	0.314066	1.35913	0.760266
Cd5l	3;3;3;3;3;3	87357881;87360876;87365790;87367541;87368449;87370204	87358029;87360911;87366110;87367879;87368769;87371073	+;+;+;+;+;+	2036	7.28065	66.4685	26.995
Cd68	11;11;11;11;11;11;11;11;11;11;11;11;11;11;11;11;11	69664213;69664306;69664371;69664751;69664751;69664751;69665035;69665035;69665035;69665247;69665247;69665247;69665476;69665503;69666020;69666020;69666020	69664504;69664504;69664504;69664921;69664921;69664921;69665113;69665113;69665113;69665366;69665366;69665366;69665936;69665936;69666062;69666062;69666153	-;-;-;-;-;-;-;-;-;-;-;-;-;-;-;-;-	1257	1.80977	10.8177	5.93547
Cep152	2;2;2;2;2;2;2;2;2;2;2;2;2;2;2;2;2;2;2;2;2;2;2;2;2;2;2;2	125563088;125566209;125566533;125568824;125569555;125571669;125576714;125579374;125581696;125583792;125586331;125587601;125587893;125589456;125590110;125594873;125601149;125602842;125605336;125611008;125612937;125614288;125618373;125619666;125619997;125620287;125621173;125624876	125564397;125566321;125566689;125568927;125569651;125571833;125576855;125580024;125581827;125584064;125586474;125587727;125588021;125589565;125590232;125595071;125601312;125602933;125605483;125611208;125613076;125614431;125618541;125619890;125620069;125620390;125621266;125625113	-;-;-;-;-;-;-;-;-;-;-;-;-;-;-;-;-;-;-;-;-;-;-;-;-;-;-;-	5768	1.66664	3.36475	3.50476
Cerk	15;15;15;15;15;15;15;15;15;15;15;15;15;15;15;15;15;15;15;15;15;15;15;15;15;15;15;15;15;15;15	86139128;86139129;86140321;86142682;86142682;86142682;86144522;86144522;86144522;86145488;86145488;86145488;86146285;86146285;86146285;86149278;86149278;86149278;86151535;86151535;86151535;86152405;86154974;86154974;86156588;86156588;86159094;86159094;86164968;86165822;86185507	86141612;86141612;86141612;86142890;86142890;86142890;86144727;86144727;86144727;86145564;86145564;86145564;86146390;86146390;86146390;86149430;86149430;86149430;86151609;86151609;86151609;86152448;86155119;86155119;86156651;86156651;86159219;86159468;86165090;86165935;86186141	-;-;-;-;-;-;-;-;-;-;-;-;-;-;-;-;-;-;-;-;-;-;-;-;-;-;-;-;-;-;-	4812	0.213501	0.49452	0.605423
Ces2c	8;8;8;8;8;8;8;8;8;8;8;8;8	104847068;104847989;104849644;104850440;104850650;104851652;104852013;104852283;104852581;104853086;104853579;104853750;104854078	104847208;104848199;104849785;104850573;104850908;104851750;104852153;104852363;104852725;104853223;104853651;104854457;104854483	+;+;+;+;+;+;+;+;+;+;+;+;+	2298	0.686571	2.10251	2.12828
Ces2e	8;8;8;8;8;8;8;8;8;8;8;8;8;8;8;8;8;8;8;8;8;8;8;8;8	104926260;104926264;104927008;104927008;104928728;104928728;104929482;104929482;104929697;104929697;104930666;104930666;104931066;104931066;104931328;104931328;104931842;104931842;104932400;104932400;104932924;104932924;104933528;104933528;104934447	104926396;104926396;104927212;104927212;104928869;104928869;104929615;104929615;104929955;104929955;104930764;104930764;104931206;104931206;104931408;104931408;104931986;104931986;104932537;104932537;104932996;104932996;104933754;104934672;104934668	+;+;+;+;+;+;+;+;+;+;+;+;+;+;+;+;+;+;+;+;+;+;+;+;+	2699	9.924	24.3891	20.0347
Cfp	X;X;X;X;X;X;X;X;X;X;X;X	20925454;20925651;20927181;20927281;20927535;20927535;20927953;20928328;20928643;20929596;20931152;20931391	20925759;20925759;20927392;20927392;20927614;20927723;20928126;20928519;20928813;20929771;20931302;20931555	-;-;-;-;-;-;-;-;-;-;-;-	1736	1.81767	7.9575	4.54333
Chac1	2;2;2	119351229;119352357;119353189	119351636;119352392;119354381	+;+;+	1637	0.493107	1.47253	2.25712
Chp2	7;7;7;7;7;7;7;7;7;7	122219496;122220477;122220659;122220850;122221102;122221573;122221832;122221832;122222122;122222122	122219778;122220549;122220739;122220980;122221163;122221719;122221954;122221954;122222183;122222824	+;+;+;+;+;+;+;+;+;+	1603	0.732459	2.3906	1.95038
Chrna4	2;2;2;2;2;2;2;2;2;2;2;2;2;2;2;2;2;2;2;2;2;2;2;2;2	181018380;181018381;181022311;181024765;181024765;181028198;181028198;181028198;181029425;181033897;181033920;181033920;181034024;181034109;181034109;181034109;181034109;181037419;181037419;181037419;181037419;181038992;181038992;181038992;181043387	181018569;181018653;181024879;181024879;181024879;181028328;181029572;181029572;181029572;181034029;181034029;181034029;181034029;181034153;181034153;181034153;181034153;181037570;181037570;181037570;181037570;181039305;181039225;181039075;181043546	-;-;-;-;-;-;-;-;-;-;-;-;-;-;-;-;-;-;-;-;-;-;-;-;-	5022	0.043837	1.64921	1.69787
Ciart	3;3;3;3;3;3;3;3;3;3;3;3;3;3;3;3;3;3;3;3;3;3;3;3;3;3;3;3;3;3	95878503;95878505;95878804;95879510;95880409;95880409;95880409;95880409;95880452;95880635;95880635;95880635;95880635;95880635;95880673;95880983;95880983;95880983;95880983;95880983;95880983;95881181;95881181;95881181;95881181;95881181;95881955;95882155;95882155;95882155	95879149;95879149;95879149;95879785;95880520;95880520;95880520;95880520;95880520;95880713;95880713;95880713;95880713;95880713;95880713;95881058;95881058;95881058;95881058;95881058;95881058;95881246;95881279;95881589;95882205;95881589;95882074;95882203;95882251;95882231	-;-;-;-;-;-;-;-;-;-;-;-;-;-;-;-;-;-;-;-;-;-;-;-;-;-;-;-;-;-	2261	3.53771	16.9032	14.0321
Cish	9;9;9;9;9;9;9;9;9;9;9;9;9;9	107296026;107296710;107296907;107296912;107299155;107299896;107299924;107299924;107299924;107300368;107300368;107300368;107300368;107300421	107297034;107297034;107299778;107297034;107299213;107300144;107300080;107300144;107300144;107300458;107301943;107302784;107301987;107300551	+;+;+;+;+;+;+;+;+;+;+;+;+;+	6419	0.171483	1.05919	1.38924
Clec12a	6;6;6;6;6;6;6;6;6;6;6;6;6;6;6;6;6;6	129342691;129349713;129349742;129349964;129350387;129350387;129353352;129353352;129353352;129353647;129353647;129354477;129354477;129356802;129359408;129359408;129363894;129363894	129342790;129349858;129349858;129350511;129350511;129350511;129353450;129353624;129353450;129353835;129353835;129354628;129354628;129359511;129359511;129359415;129365303;129364416	+;+;+;+;+;+;+;+;+;+;+;+;+;+;+;+;+;+	5528	0.132748	0.665269	0.443457
Clec4a1	6;6;6;6;6;6	122921848;122924717;122927964;122930677;122932149;122933778	122922079;122924830;122928065;122930828;122932264;122934619	+;+;+;+;+;+	1558	0.376807	1.98359	1.18579
Clec4a3	6;6;6;6;6;6;6;6;6;6;6;6;6;6;6;6	122952515;122952644;122952778;122952806;122954036;122954036;122954036;122964247;122964247;122966422;122966422;122966422;122967453;122967453;122969368;122969368	122952540;122952949;122952949;122952949;122954152;122954152;122954152;122964348;122964348;122966576;122966549;122966576;122967565;122967565;122969874;122969875	+;+;+;+;+;+;+;+;+;+;+;+;+;+;+;+	1327	0.331801	3.28373	1.12447
Clec4f	6;6;6;6;6;6;6;6;6;6;6;6	83644542;83645217;83645896;83645896;83646788;83646788;83652359;83652359;83654683;83655058;83655957;83656068	83645370;83645370;83646014;83646014;83646939;83646939;83653300;83652487;83654763;83655174;83656187;83656121	-;-;-;-;-;-;-;-;-;-;-;-	2471	9.77057	46.8004	26.8293
Clec4n	6;6;6;6;6;6;6;6;6;6;6;6;6;6;6;6;6;6;6;6;6;6;6;6;6;6;6;6;6;6	123229843;123229854;123229857;123229857;123229857;123230018;123230504;123230504;123230504;123230504;123230504;123230693;123230745;123232093;123232093;123232093;123232093;123235444;123235444;123235444;123235444;123244478;123244478;123244478;123244478;123246441;123246441;123246441;123246441;123246441	123230043;123230043;123230043;123230043;123230043;123230043;123230593;123230593;123230593;123230593;123230593;123230870;123230829;123232194;123232194;123232194;123232194;123235595;123235595;123235595;123235595;123244593;123244593;123244593;123244593;123246585;123247019;123247019;123247019;123247021	+;+;+;+;+;+;+;+;+;+;+;+;+;+;+;+;+;+;+;+;+;+;+;+;+;+;+;+;+;+	1420	0.206713	2.00225	0.850671
Clec7a	6;6;6;6;6;6;6;6;6;6;6;6;6;6;6;6;6;6;6	129461591;129461591;129463026;129465455;129465455;129465455;129467517;129467517;129467517;129468869;129468869;129470540;129470889;129470899;129470899;129472583;129472583;129472583;129472583	129463167;129463167;129463167;129465573;129465573;129465573;129467668;129467668;129467668;129469003;129468993;129470997;129470997;129470997;129470997;129472777;129472779;129472772;129472777	-;-;-;-;-;-;-;-;-;-;-;-;-;-;-;-;-;-;-	2638	0.361631	1.87441	1.02355
Cmklr1	5;5;5;5;5;5;5;5;5;5;5;5;5;5	113612354;113614036;113614927;113616528;113616528;113616528;113627529;113631306;113639154;113643112;113643568;113649387;113650221;113650221	113614940;113614940;113614940;113616616;113616616;113616616;113627615;113631380;113639305;113643211;113643603;113649462;113650396;113650426	-;-;-;-;-;-;-;-;-;-;-;-;-;-	3408	0.129196	1.36929	0.583794
Cnn2	10;10;10;10;10;10;10;10;10;10;10;10;10	79988584;79988623;79991360;79991360;79992273;79992273;79992443;79992443;79993214;79993428;79993428;79994351;79994351	79988740;79988740;79991481;79991481;79992339;79992339;79992580;79992580;79993330;79993574;79993574;79994684;79996062	+;+;+;+;+;+;+;+;+;+;+;+;+	2460	0.596612	1.43215	1.53088
Cobl	11;11;11;11;11;11;11;11;11;11;11;11;11;11;11;11;11;11;11;11;11;11;11;11;11;11;11;11;11;11;11;11;11;11;11;11;11;11;11;11;11;11;11;11;11;11;11;11;11;11;11;11;11;11;11;11;11;11;11;11;11;11;11;11;11;11;11;11;11;11;11;11;11;11;11;11;11;11;11;11;11;11;11;11;11;11;11;11;11;11;11;11;11;11;11;11;11;11;11;11;11;11	12236608;12236676;12236676;12236678;12236678;12237111;12249650;12249650;12249650;12249650;12249650;12251023;12251023;12251023;12251023;12251023;12253089;12253089;12253089;12253089;12253089;12256145;12256145;12256145;12256145;12256145;12266856;12266856;12266856;12266856;12267007;12296363;12304867;12306958;12306958;12306958;12309614;12309614;12309614;12309614;12309614;12309614;12309614;12309614;123…	12238059;12238059;12238059;12238059;12238059;12238059;12249913;12249913;12249913;12249913;12249913;12251142;12251142;12251142;12251142;12251142;12254971;12254971;12254971;12254971;12254971;12256242;12256242;12256242;12256242;12256242;12267144;12267144;12267144;12267144;12267144;12296567;12307128;12307128;12307128;12307128;12309752;12309752;12309752;12309752;12309752;12309752;12309752;12309752;123…	-;-;-;-;-;-;-;-;-;-;-;-;-;-;-;-;-;-;-;-;-;-;-;-;-;-;-;-;-;-;-;-;-;-;-;-;-;-;-;-;-;-;-;-;-;-;-;-;-;-;-;-;-;-;-;-;-;-;-;-;-;-;-;-;-;-;-;-;-;-;-;-;-;-;-;-;-;-;-;-;-;-;-;-;-;-;-;-;-;-;-;-;-;-;-;-;-;-;-;-;-;-	8142	0.775111	1.67768	2.05959
Coq10b	1;1;1;1;1;1;1;1;1;1;1	55052770;55052770;55052869;55059639;55061275;55064181;55064181;55067497;55067497;55071636;55071636	55052990;55052990;55054093;55061757;55061424;55064373;55064373;55067598;55067598;55072702;55071953	+;+;+;+;+;+;+;+;+;+;+	4805	4.15406	18.6583	13.1243
Creb3l2	6;6;6;6;6;6;6;6;6;6;6;6;6;6;6;6	37327255;37334292;37334363;37335828;37335828;37336215;37336215;37336406;37353557;37354751;37355643;37358463;37362358;37363968;37379812;37441699	37332500;37334582;37334582;37335954;37335954;37336314;37336314;37336535;37353625;37354809;37355789;37358647;37362445;37364143;37380028;37442146	-;-;-;-;-;-;-;-;-;-;-;-;-;-;-;-	7283	2.56937	5.65214	7.37585
Crybg3	16;16;16;16;16;16;16;16;16;16;16;16;16;16;16;16;16;16;16;16;16;16;16;16;16;16;16;16;16;16;16;16;16;16;16;16;16;16;16;16;16	59490775;59492088;59494667;59494667;59495610;59495610;59503125;59503125;59506181;59506181;59522084;59522084;59524861;59524861;59526505;59529223;59529223;59530104;59530104;59530331;59530331;59536698;59536698;59539805;59539805;59542060;59543176;59544029;59544071;59550402;59550402;59552172;59552172;59552530;59552530;59553705;59554107;59558013;59565213;59577798;59600745	59493685;59493685;59494826;59494826;59495768;59495768;59503248;59503248;59506320;59506320;59522213;59522213;59525614;59524970;59526538;59529255;59529255;59530230;59530230;59530476;59530476;59536824;59536824;59539880;59539938;59542095;59543290;59544165;59544165;59550549;59550549;59552287;59552287;59552574;59552574;59553970;59555752;59560242;59565643;59577864;59600886	-;-;-;-;-;-;-;-;-;-;-;-;-;-;-;-;-;-;-;-;-;-;-;-;-;-;-;-;-;-;-;-;-;-;-;-;-;-;-;-;-	10358	0.874959	1.9125	1.79732
Csf2rb2	15;15;15;15;15;15;15;15;15;15;15;15;15;15	78282517;78285980;78286712;78286973;78287888;78288825;78291556;78291836;78292461;78292708;78294342;78296976;78298142;78305578	78285379;78286083;78286769;78287063;78288047;78288961;78291713;78291971;78292629;78292865;78294529;78297102;78298378;78305603	-;-;-;-;-;-;-;-;-;-;-;-;-;-	4612	0.151158	0.690187	0.639381
Ctss	3;3;3;3;3;3;3;3;3;3;3;3;3;3;3;3	95526786;95526786;95529434;95529437;95538721;95538721;95543013;95543013;95545333;95545333;95546796;95546796;95550053;95550053;95556086;95556086	95526925;95526925;95529560;95529560;95538843;95538843;95543162;95543162;95545563;95545563;95546961;95546961;95550155;95550155;95556403;95556400	+;+;+;+;+;+;+;+;+;+;+;+;+;+;+;+	1358	9.07834	53.616	27.3131
Cux2	5;5;5;5;5;5;5;5;5;5;5;5;5;5;5;5;5;5;5;5;5;5;5;5;5;5;5;5;5;5;5;5;5;5;5;5;5;5;5;5;5;5;5;5;5;5;5;5;5;5;5;5;5;5;5;5;5;5;5;5;5;5;5;5;5;5;5;5;5;5;5;5;5;5;5;5;5;5;5;5;5;5;5;5;5;5;5;5;5;5;5;5;5;5;5;5;5;5;5;5;5;5;5	121856366;121860216;121860308;121860308;121864647;121864647;121864647;121864647;121865852;121865852;121865852;121865852;121867091;121867091;121867091;121868445;121868445;121868445;121869008;121869008;121869008;121873050;121873050;121873050;121873089;121873657;121873657;121873657;121873657;121875079;121875079;121875079;121875287;121875287;121875287;121876830;121876830;121876830;121876968;121876968…	121861381;121861381;121861381;121861381;121864920;121864920;121864920;121864920;121866063;121866040;121866040;121866040;121867360;121867360;121867360;121868616;121868616;121868616;121869780;121869780;121869780;121873151;121873151;121873151;121873241;121874324;121874301;121874301;121874301;121875178;121875178;121875178;121875335;121875335;121875335;121876888;121876888;121876888;121877159;121877159…	-;-;-;-;-;-;-;-;-;-;-;-;-;-;-;-;-;-;-;-;-;-;-;-;-;-;-;-;-;-;-;-;-;-;-;-;-;-;-;-;-;-;-;-;-;-;-;-;-;-;-;-;-;-;-;-;-;-;-;-;-;-;-;-;-;-;-;-;-;-;-;-;-;-;-;-;-;-;-;-;-;-;-;-;-;-;-;-;-;-;-;-;-;-;-;-;-;-;-;-;-;-;-	10082	0.0655077	0.288138	0.65897
Cxcl1	5;5;5;5;5	90891241;90891243;90891470;90891709;90892508	90891380;90893113;90891593;90891789;90893115	+;+;+;+;+	1875	9.39305	22.0533	22.8137
Cxcl10	5;5;5;5;5;5;5;5;5;5	92346638;92346638;92346805;92347805;92348001;92348089;92348089;92348754;92348754;92348754	92348867;92347385;92347894;92347894;92348215;92348215;92348215;92348889;92348882;92348882	-;-;-;-;-;-;-;-;-;-	2252	0.130343	0.837105	0.836139
Cxcl9	5;5;5;5;5;5	92321347;92325064;92326623;92326750;92327963;92327963	92323906;92325148;92326876;92326876;92328079;92328078	-;-;-;-;-;-	3016	0.632614	3.11502	3.22768
Cyb5r3	15;15;15;15;15;15;15;15;15;15;15;15;15;15;15;15;15;15;15;15;15;15;15	83153494;83157064;83158826;83160104;83160104;83160338;83160338;83160385;83160821;83160821;83160821;83161850;83161850;83161850;83162232;83162232;83162232;83166075;83166075;83166075;83170137;83170434;83172112	83154722;83158925;83158925;83160189;83160189;83160421;83160421;83160421;83160950;83160950;83160950;83161956;83161956;83161956;83162304;83162304;83162304;83166206;83166206;83166206;83170177;83170506;83172592	-;-;-;-;-;-;-;-;-;-;-;-;-;-;-;-;-;-;-;-;-;-;-	4298	41.1422	89.8511	87.8198
Cybb	X;X;X;X;X;X;X;X;X;X;X;X;X;X;X;X;X;X;X;X;X;X;X;X;X;X;X;X;X;X;X;X	9435252;9439895;9442533;9444548;9446693;9446925;9449381;9449641;9449641;9450682;9450682;9450682;9451451;9453586;9453586;9455134;9456960;9456960;9457018;9464988;9465644;9465644;9465644;9467083;9467083;9467083;9467083;9469206;9469206;9469206;9469206;9487715	9438343;9440019;9442679;9444710;9446946;9446946;9449733;9449733;9449733;9450811;9450811;9450811;9451533;9453776;9453776;9455279;9457044;9457044;9457044;9465754;9465754;9465754;9465754;9467178;9467178;9467178;9467178;9469270;9469304;9469269;9469324;9487771	-;-;-;-;-;-;-;-;-;-;-;-;-;-;-;-;-;-;-;-;-;-;-;-;-;-;-;-;-;-;-;-	5808	0.536981	3.81515	1.90241
Cyp21a1	17;17;17;17;17;17;17;17;17;17;17;17;17;17;17;17;17;17	34801348;34802133;34802164;34802305;34802671;34802671;34802985;34802985;34803160;34803160;34803348;34803348;34803549;34803573;34804044;34804044;34804198;34804198	34802048;34802236;34802474;34802474;34802871;34802871;34803071;34803071;34803256;34803261;34803402;34803443;34803691;34803691;34804147;34804133;34804407;34804561	-;-;-;-;-;-;-;-;-;-;-;-;-;-;-;-;-;-	2140	0.0342912	1.53077	1.17873
Cyp2a22	7;7;7;7;7;7;7;7;7;7;7;7;7;7;7;7;7	26931631;26932055;26933479;26933479;26934129;26934129;26934761;26934761;26936309;26936309;26937707;26938079;26938079;26938740;26938740;26939183;26939183	26932532;26932532;26933620;26933620;26934316;26934316;26934899;26934899;26936485;26937867;26937867;26938228;26938228;26938902;26938902;26939380;26939384	-;-;-;-;-;-;-;-;-;-;-;-;-;-;-;-;-	3445	0.511233	4.8173	1.54694
Cyp2a4	7;7;7;7;7;7;7;7;7	26307169;26307650;26308513;26308928;26310706;26312187;26312767;26313555;26314703	26307397;26307812;26308662;26309088;26310882;26312328;26312954;26313696;26315088	+;+;+;+;+;+;+;+;+	1738	0.232225	35.1157	21.0347
Cyp2a5	7;7;7;7;7;7;7;7;7;7;7;7;7;7;7;7;7;7;7;7;7;7;7;7;7;7;7	26835305;26835364;26835795;26836203;26836675;26836675;26836675;26837091;26837091;26837091;26838868;26838868;26838868;26840360;26840360;26840360;26840468;26840937;26840937;26840937;26840937;26840944;26841728;26841728;26842878;26842982;26843336	26835543;26835543;26835957;26836242;26836824;26836824;26836824;26837251;26837251;26837251;26839044;26839044;26839044;26840501;26840501;26840501;26840501;26841063;26841124;26841124;26841124;26841099;26841831;26841869;26843528;26843267;26843548	+;+;+;+;+;+;+;+;+;+;+;+;+;+;+;+;+;+;+;+;+;+;+;+;+;+;+	2073	40.3732	427.47	134.691
Cyp2b13	7;7;7;7;7;7;7;7;7	26061497;26080598;26080890;26081649;26085853;26086482;26088245;26088601;26095640	26061690;26080760;26081039;26081809;26086029;26086623;26088432;26088742;26096197	+;+;+;+;+;+;+;+;+	1875	0.0782754	10.0212	0.5495
Cyp2b9	7;7;7;7;7;7;7;7;7	26173411;26186581;26186886;26187652;26198418;26199044;26200733;26201091;26210103	26173604;26186743;26187035;26187812;26198594;26199185;26200920;26201232;26210661	+;+;+;+;+;+;+;+;+	1876	0.547636	104.517	57.3383
Cyp2c38	19;19;19;19;19;19;19;19;19	39389556;39392149;39401606;39404661;39436054;39438214;39460263;39460577;39462887	39391112;39392290;39401793;39404802;39436230;39438374;39460412;39460739;39463075	-;-;-;-;-;-;-;-;-	2869	24.0689	130.858	77.7822
Cyp2c39	19;19;19;19;19;19;19;19;19	39510862;39513173;39513500;39536736;39538854;39560859;39563826;39566887;39568013	39511038;39513335;39513649;39536896;39539030;39561000;39564013;39567028;39568529	+;+;+;+;+;+;+;+;+	1817	118.815	519.005	345.73
Cyp2c55	19;19;19;19;19;19;19;19;19	39007019;39011020;39011690;39018643;39031262;39034239;39035445;39038100;39042017	39007213;39011182;39011839;39018803;39031438;39034380;39035632;39038241;39042693	+;+;+;+;+;+;+;+;+	1995	0.183918	0.929452	0.96166
Cyp2c70	19;19;19;19;19;19;19;19;19;19;19;19;19;19;19;19;19;19;19;19	40153353;40156723;40160555;40164352;40164393;40165328;40165328;40165468;40167463;40167463;40167463;40180144;40180361;40180361;40183866;40183866;40187095;40187095;40187095;40187095	40153757;40156864;40160742;40164493;40164493;40165501;40165501;40165501;40167623;40167623;40167623;40180510;40180510;40180510;40184028;40184028;40187333;40187286;40187286;40187286	-;-;-;-;-;-;-;-;-;-;-;-;-;-;-;-;-;-;-;-	1981	19.8924	90.872	118.367
Cyp2g1	7;7;7;7;7;7;7;7;7;7;7	26808892;26809683;26811399;26814131;26814625;26816295;26816544;26819035;26819035;26819342;26820648	26809106;26809845;26811548;26814291;26814801;26816685;26816685;26819115;26819222;26819483;26821205	+;+;+;+;+;+;+;+;+;+;+	2145	0.136845	3.57308	0.596274
Cyp39a1	17;17;17;17;17;17;17;17;17;17;17;17	43667425;43676831;43680124;43682948;43685186;43691634;43701477;43725515;43730972;43731925;43746525;43749904	43667794;43676966;43680298;43683097;43685276;43691738;43701567;43725648;43731067;43732013;43746612;43751431	+;+;+;+;+;+;+;+;+;+;+;+	3053	3.60546	11.5094	10.9738
Cyth4	15;15;15;15;15;15;15;15;15;15;15;15;15	78597047;78602693;78604636;78605847;78606957;78608126;78609762;78611449;78615717;78618376;78619262;78619789;78620495	78597219;78602775;78604700;78605913;78607075;78608206;78609874;78611597;78615828;78618452;78619333;78619943;78622019	+;+;+;+;+;+;+;+;+;+;+;+;+	2791	0.289221	1.04085	0.814687
Dact1	12;12;12;12;12;12;12;12	71309884;71309984;71312686;71312686;71313785;71313785;71317060;71317171	71310307;71310307;71312818;71312818;71313940;71313940;71318894;71320107	+;+;+;+;+;+;+;+	3761	0.312186	0.723099	0.982428
Dbf4	5;5;5;5;5;5;5;5;5;5;5;5;5;5;5;5;5;5;5;5;5;5;5;5;5;5;5;5;5;5;5;5;5;5;5;5;5;5;5;5;5;5;5;5;5;5;5;5;5;5;5;5;5;5;5;5	8396973;8397011;8397154;8397852;8398325;8399688;8399688;8399688;8399688;8401661;8403080;8403080;8403080;8403080;8403143;8403612;8403612;8403612;8403612;8403612;8404871;8404871;8404871;8404871;8405802;8405802;8405802;8405802;8408234;8408234;8408234;8408234;8408494;8408494;8408494;8408494;8410010;8410010;8410010;8410010;8412121;8412121;8412121;8412121;8418427;8421221;8421221;8421221;8421221;8421221…	8398162;8398162;8398162;8398162;8398669;8400305;8399812;8399812;8399812;8403191;8403191;8403191;8403191;8403191;8405240;8403612;8403740;8403740;8403740;8403740;8404916;8404916;8404916;8404913;8405838;8405838;8405838;8405838;8408310;8408310;8408310;8408310;8408563;8408563;8408563;8408563;8410060;8410060;8410060;8410060;8412300;8412300;8412300;8412300;8420300;8421393;8421393;8421393;8421393;8421393…	-;-;-;-;-;-;-;-;-;-;-;-;-;-;-;-;-;-;-;-;-;-;-;-;-;-;-;-;-;-;-;-;-;-;-;-;-;-;-;-;-;-;-;-;-;-;-;-;-;-;-;-;-;-;-;-	8728	0.126117	0.456766	0.293082
Dbp	7;7;7;7;7;7;7;7;7;7;7;7;7;7;7	45705088;45705269;45705284;45706606;45706606;45707104;45707889;45708260;45708260;45708260;45709665;45709665;45709665;45709665;45709665	45705762;45705762;45705762;45706716;45707016;45708471;45708471;45708471;45708471;45708471;45709896;45710114;45710028;45710114;45710203	+;+;+;+;+;+;+;+;+;+;+;+;+;+;+	2993	19.7372	46.1034	49.1196
Ddit4	10;10;10	59949675;59951317;59951697	59951029;59951572;59951770	-;-;-	1685	0.653263	4.29175	1.85547
Dntt	19;19;19;19;19;19;19;19;19;19;19;19;19;19;19;19;19;19;19;19;19;19;19	41029275;41029275;41037148;41037148;41038874;41038874;41039774;41039774;41041281;41041281;41042863;41042863;41046188;41046188;41047529;41047529;41052995;41052995;41055760;41055760;41058567;41059066;41059066	41029641;41029641;41037322;41037322;41039002;41039002;41039944;41039944;41041352;41041352;41042986;41042986;41046320;41046320;41047637;41047637;41053240;41053240;41055843;41055843;41058626;41059523;41059523	+;+;+;+;+;+;+;+;+;+;+;+;+;+;+;+;+;+;+;+;+;+;+	2128	0.310361	0.958497	0.834775
Dock2	11;11;11;11;11;11;11;11;11;11;11;11;11;11;11;11;11;11;11;11;11;11;11;11;11;11;11;11;11;11;11;11;11;11;11;11;11;11;11;11;11;11;11;11;11;11;11;11;11;11;11;11;11;11;11;11;11;11;11;11;11;11;11;11;11;11;11;11;11;11;11;11;11;11;11;11;11;11;11;11;11;11;11;11;11;11;11;11;11;11;11;11;11;11;11;11;11;11;11;11;11;11;11;11;11;11;11;11;11;11;11;11;11;11;11;11;11;11;11;11;11;11;11;11;11;11;11;11;11;11;11;11;11;…	34226815;34228602;34229474;34230559;34230656;34231571;34231571;34232769;34238150;34239529;34247775;34248574;34249757;34254331;34256527;34258084;34261433;34262387;34266241;34267948;34273045;34273669;34273669;34282621;34282621;34294110;34294110;34294259;34294259;34300487;34300487;34307651;34310350;34310350;34312459;34312459;34312459;34361959;34363863;34437312;34437312;34438275;34438275;34438275;344…	34227730;34228744;34229594;34230824;34230824;34231670;34231698;34232906;34238233;34239705;34247861;34248658;34249838;34254472;34256631;34258173;34261552;34262477;34266281;34268104;34273296;34273754;34273754;34282769;34282769;34294168;34294168;34294359;34294359;34300565;34300565;34310444;34310444;34310444;34312637;34312557;34312557;34362828;34363917;34438370;34438370;34438370;34438370;34438370;344…	-;-;-;-;-;-;-;-;-;-;-;-;-;-;-;-;-;-;-;-;-;-;-;-;-;-;-;-;-;-;-;-;-;-;-;-;-;-;-;-;-;-;-;-;-;-;-;-;-;-;-;-;-;-;-;-;-;-;-;-;-;-;-;-;-;-;-;-;-;-;-;-;-;-;-;-;-;-;-;-;-;-;-;-;-;-;-;-;-;-;-;-;-;-;-;-;-;-;-;-;-;-;-;-;-;-;-;-;-;-;-;-;-;-;-;-;-;-;-;-;-;-;-;-;-;-;-;-;-;-;-;-;-;-;-;-;-;-;-;-;-;-;-;-;-;-;-;-;-;-;-;-;-	11425	0.0449613	0.308367	0.152374
Dok3	13;13;13;13;13	55523235;55524219;55524481;55527332;55528449	55524111;55524391;55524580;55527637;55528538	-;-;-;-;-	1546	0.664531	2.1589	1.79249
Dsg1c	18;18;18;18;18;18;18;18;18;18;18;18;18;18;18	20247340;20264285;20264829;20266057;20267814;20270303;20271925;20272351;20274604;20275170;20276891;20279213;20279652;20281849;20283054	20247487;20264320;20264960;20266212;20267958;20270469;20272059;20272536;20274872;20275309;20277076;20279340;20279724;20282057;20285031	+;+;+;+;+;+;+;+;+;+;+;+;+;+;+	4088	2.57003	8.15698	5.97927
Dst	1;1;1;1;1;1;1;1;1;1;1;1;1;1;1;1;1;1;1;1;1;1;1;1;1;1;1;1;1;1;1;1;1;1;1;1;1;1;1;1;1;1;1;1;1;1;1;1;1;1;1;1;1;1;1;1;1;1;1;1;1;1;1;1;1;1;1;1;1;1;1;1;1;1;1;1;1;1;1;1;1;1;1;1;1;1;1;1;1;1;1;1;1;1;1;1;1;1;1;1;1;1;1;1;1;1;1;1;1;1;1;1;1;1;1;1;1;1;1;1;1;1;1;1;1;1;1;1;1;1;1;1;1;1;1;1;1;1;1;1;1;1;1;1;1;1;1;1;1;1;1;1;1;1;1;1;1;1;1;1;1;1;1;1;1;1;1;1;1;1;1;1;1;1;1;1;1;1;1;1;1;1;1;1;1;1;1;1;1;1;1;1;1;1;1;1;1;1;1;1…	33908225;33908999;33968703;34005880;34005882;34006126;34006180;34006191;34006191;34006191;34011813;34011825;34011825;34086242;34086242;34086242;34086242;34086242;34086242;34086242;34086242;34089292;34113933;34113933;34113933;34113933;34113933;34113933;34113933;34113933;34113933;34116118;34116118;34116118;34116118;34116118;34116118;34116118;34116118;34116118;34117432;34117432;34117432;34117432;341…	33908452;33909033;33968903;34006008;34006008;34006398;34006398;34006398;34006398;34006398;34011915;34011915;34011915;34086303;34086303;34086303;34086303;34086303;34086303;34086303;34086303;34089428;34114022;34114022;34114022;34114022;34114022;34114022;34114022;34114022;34114022;34116195;34116195;34116195;34116195;34116195;34116195;34116195;34116195;34116195;34119153;34117524;34117524;34117524;341…	+;+;+;+;+;+;+;+;+;+;+;+;+;+;+;+;+;+;+;+;+;+;+;+;+;+;+;+;+;+;+;+;+;+;+;+;+;+;+;+;+;+;+;+;+;+;+;+;+;+;+;+;+;+;+;+;+;+;+;+;+;+;+;+;+;+;+;+;+;+;+;+;+;+;+;+;+;+;+;+;+;+;+;+;+;+;+;+;+;+;+;+;+;+;+;+;+;+;+;+;+;+;+;+;+;+;+;+;+;+;+;+;+;+;+;+;+;+;+;+;+;+;+;+;+;+;+;+;+;+;+;+;+;+;+;+;+;+;+;+;+;+;+;+;+;+;+;+;+;+;+;+;+;+;+;+;+;+;+;+;+;+;+;+;+;+;+;+;+;+;+;+;+;+;+;+;+;+;+;+;+;+;+;+;+;+;+;+;+;+;+;+;+;+;+;+;+;+;+;+…	41155	2.8057	6.24844	6.61872
Dync2h1	9;9;9;9;9;9;9;9;9;9;9;9;9;9;9;9;9;9;9;9;9;9;9;9;9;9;9;9;9;9;9;9;9;9;9;9;9;9;9;9;9;9;9;9;9;9;9;9;9;9;9;9;9;9;9;9;9;9;9;9;9;9;9;9;9;9;9;9;9;9;9;9;9;9;9;9;9;9;9;9;9;9;9;9;9;9;9;9;9;9;9;9;9;9;9;9;9;9;9;9;9;9;9;9;9;9;9;9;9;9;9;9;9;9;9;9;9;9;9;9;9;9;9;9;9;9;9;9;9;9;9;9;9;9;9;9;9;9;9;9;9;9;9;9;9;9;9;9;9;9;9;9;9;9;9;9;9;9;9;9;9;9;9;9;9;9;9;9;9;9;9;9;9;9;9;9;9;9;9;9;9;9;9;9;9;9;9;9;9;9;9;9;9;9;9;9;9;9;9;9…	6928503;6928503;6929304;6935239;6935239;6935239;6940543;6940543;6940543;6940585;6941595;6941595;6941595;6941595;6955907;6955907;6955907;6955907;6967080;6967080;6967080;6983390;6983390;6983390;6992524;6992524;6992524;6993938;6993938;6993938;6996864;6996864;6996864;7001341;7001341;7001341;7002556;7002556;7002556;7005490;7005490;7005490;7006716;7006716;7006716;7009971;7009971;7009971;7011173;7011173…	6929623;6929623;6929623;6935355;6935355;6935355;6940624;6940624;6940624;6940624;6941704;6941704;6941704;6941704;6956689;6955996;6955996;6955996;6967289;6967289;6967289;6983506;6983506;6983506;6992628;6992628;6992628;6994146;6994146;6994146;6996939;6996939;6996939;7001496;7001496;7001496;7002666;7002666;7002666;7005615;7005615;7005615;7006876;7006876;7006876;7010043;7010043;7010043;7011304;7011304…	-;-;-;-;-;-;-;-;-;-;-;-;-;-;-;-;-;-;-;-;-;-;-;-;-;-;-;-;-;-;-;-;-;-;-;-;-;-;-;-;-;-;-;-;-;-;-;-;-;-;-;-;-;-;-;-;-;-;-;-;-;-;-;-;-;-;-;-;-;-;-;-;-;-;-;-;-;-;-;-;-;-;-;-;-;-;-;-;-;-;-;-;-;-;-;-;-;-;-;-;-;-;-;-;-;-;-;-;-;-;-;-;-;-;-;-;-;-;-;-;-;-;-;-;-;-;-;-;-;-;-;-;-;-;-;-;-;-;-;-;-;-;-;-;-;-;-;-;-;-;-;-;-;-;-;-;-;-;-;-;-;-;-;-;-;-;-;-;-;-;-;-;-;-;-;-;-;-;-;-;-;-;-;-;-;-;-;-;-;-;-;-;-;-;-;-;-;-;-;-…	16348	0.210975	0.446135	0.486804
E230013L22Rik	8;8	11477929;11479141	11478683;11480241	+;+	1856	0.751229	1.5985	1.68452
E330011M16Rik	1	55051319	55053112	-	1794	2.78153	11.6795	8.91171
Egfr	11;11;11;11;11;11;11;11;11;11;11;11;11;11;11;11;11;11;11;11;11;11;11;11;11;11;11;11;11;11;11;11;11;11;11;11;11;11;11;11;11;11;11;11;11;11;11;11;11;11;11;11;11;11;11;11	16752203;16752211;16752230;16793640;16858896;16858896;16860068;16860068;16862946;16862946;16867231;16867231;16868108;16868108;16869219;16869219;16870976;16870976;16871583;16871583;16871802;16871802;16872846;16872846;16874960;16874960;16878127;16878127;16878150;16881464;16881464;16881464;16883456;16883456;16883456;16884254;16887141;16887141;16889913;16891178;16893008;16896894;16904305;16905185;169…	16752570;16752570;16752570;16793744;16859047;16859047;16860251;16860251;16863080;16863080;16867299;16867299;16868226;16868226;16869360;16869360;16871092;16871092;16871709;16871709;16871875;16871875;16872936;16872936;16875159;16875159;16878259;16878259;16878259;16881554;16881554;16881554;16883613;16883613;16883613;16884357;16887185;16887923;16890054;16891300;16893106;16897079;16904460;16905423;169…	+;+;+;+;+;+;+;+;+;+;+;+;+;+;+;+;+;+;+;+;+;+;+;+;+;+;+;+;+;+;+;+;+;+;+;+;+;+;+;+;+;+;+;+;+;+;+;+;+;+;+;+;+;+;+;+	11326	38.1179	81.9166	92.4865
Ell3	2;2;2;2;2;2;2;2;2;2;2;2;2;2;2;2;2;2;2;2;2;2;2;2;2;2	121439010;121439027;121439627;121439627;121439848;121439848;121439980;121440116;121440116;121440116;121440234;121440234;121441096;121441096;121441096;121441262;121441262;121441427;121441427;121441711;121441711;121442146;121442146;121442396;121442396;121444115	121439549;121439549;121439671;121439671;121440019;121440019;121440019;121440426;121440158;121440158;121440426;121440426;121441151;121441171;121441171;121441341;121441341;121441613;121441613;121441823;121441823;121442181;121442181;121442601;121442861;121444278	-;-;-;-;-;-;-;-;-;-;-;-;-;-;-;-;-;-;-;-;-;-;-;-;-;-	2190	0.150787	0.790246	0.713805
Elovl6	3;3;3;3;3;3;3;3;3;3;3;3;3;3;3;3;3;3;3;3;3	129532355;129532367;129532386;129532648;129532648;129532727;129548828;129552380;129605041;129605041;129605041;129605041;129605041;129628283;129628283;129628283;129628283;129633060;129633060;129633060;129633060	129532768;129532495;129532495;129532768;129532768;129532768;129548920;129552583;129605172;129605172;129605172;129605172;129605172;129628319;129628434;129628434;129628434;129633437;129638495;129634952;129634971	+;+;+;+;+;+;+;+;+;+;+;+;+;+;+;+;+;+;+;+;+	6431	3.77129	21.8779	20.4793
Emcn	3;3;3;3;3;3;3;3;3;3;3;3;3;3;3;3;3;3;3;3;3;3;3;3;3;3;3;3;3;3;3;3;3;3;3;3;3;3;3;3	137341067;137341090;137341143;137341174;137372728;137372728;137372728;137372728;137379839;137379839;137379839;137379839;137391593;137391593;137403984;137403984;137403984;137416721;137416721;137416721;137416721;137417046;137417046;137417046;137417046;137418996;137418996;137418996;137418996;137422258;137422258;137422258;137423424;137423424;137423424;137427305;137427305;137427305;137430596;137430596	137341312;137341312;137341312;137341312;137372850;137372850;137372850;137372850;137379913;137379913;137379913;137379913;137391706;137391706;137404022;137404022;137404022;137416810;137416810;137416810;137416810;137417099;137417099;137417099;137417099;137419091;137419091;137421912;137419091;137422282;137422282;137422282;137423485;137423485;137423485;137427324;137427378;137427378;137431069;137432185	+;+;+;+;+;+;+;+;+;+;+;+;+;+;+;+;+;+;+;+;+;+;+;+;+;+;+;+;+;+;+;+;+;+;+;+;+;+;+;+	5409	0.569809	1.27982	1.15602
Emilin2	17;17;17;17;17;17;17;17	71252176;71255119;71255980;71256324;71273374;71280674;71310149;71310718	71253093;71255247;71256012;71256692;71275287;71280849;71310271;71310965	-;-;-;-;-;-;-;-	3910	0.168913	0.584889	0.508841
Eml1	12;12;12;12;12;12;12;12;12;12;12;12;12;12;12;12;12;12;12;12;12;12;12;12;12;12;12;12;12;12;12;12;12;12;12;12;12;12;12;12;12;12;12;12;12;12;12;12;12;12;12;12;12;12;12;12;12;12;12;12;12;12;12;12;12;12;12;12;12;12;12;12;12;12;12;12;12;12;12;12;12;12;12;12;12;12;12;12;12;12;12;12;12;12;12;12;12;12;12;12;12;12;12;12;12;12;12;12;12;12;12;12;12;12;12;12;12;12;12;12	108370957;108410542;108410662;108422816;108423078;108463527;108463527;108463527;108463527;108463527;108471853;108471853;108471853;108471853;108471853;108471853;108488289;108488289;108488289;108488289;108488289;108488289;108502390;108502390;108502390;108502390;108502390;108502390;108503183;108503183;108506479;108506479;108506479;108506479;108506479;108506479;108509086;108509086;108509086;108509086…	108371352;108410695;108410695;108423261;108423261;108463709;108463709;108463709;108463709;108463709;108471985;108471985;108471985;108471985;108471985;108471985;108488420;108488420;108488420;108488420;108488420;108488420;108502418;108502418;108502418;108502418;108502418;108502418;108503233;108503233;108506608;108506608;108506608;108506608;108508538;108506608;108509235;108509235;108509235;108509235…	+;+;+;+;+;+;+;+;+;+;+;+;+;+;+;+;+;+;+;+;+;+;+;+;+;+;+;+;+;+;+;+;+;+;+;+;+;+;+;+;+;+;+;+;+;+;+;+;+;+;+;+;+;+;+;+;+;+;+;+;+;+;+;+;+;+;+;+;+;+;+;+;+;+;+;+;+;+;+;+;+;+;+;+;+;+;+;+;+;+;+;+;+;+;+;+;+;+;+;+;+;+;+;+;+;+;+;+;+;+;+;+;+;+;+;+;+;+;+;+	7436	0.108555	0.328327	0.363116
Entpd1	19;19;19;19;19;19;19;19;19;19;19;19;19;19;19;19;19;19;19;19;19;19;19;19;19;19;19;19;19;19;19;19;19;19;19;19;19;19;19;19;19;19;19;19;19;19;19;19;19;19;19;19;19	40612366;40612389;40612397;40613985;40615474;40659770;40659799;40659844;40660199;40660493;40681667;40711163;40711163;40711163;40711163;40711163;40720457;40720457;40720457;40720457;40720457;40720457;40723087;40723087;40723087;40723087;40723087;40723087;40724925;40724925;40724925;40724925;40726022;40726022;40726022;40726050;40727288;40727288;40727288;40727414;40733667;40733667;40733667;40733667;407…	40612523;40612523;40612523;40614145;40615718;40659900;40659900;40659900;40660327;40660863;40681828;40711237;40711290;40711290;40711290;40711290;40720574;40720574;40720574;40720574;40720574;40720574;40723193;40723097;40723237;40723237;40723237;40723237;40725026;40725084;40725084;40725084;40726262;40726258;40726258;40726258;40727548;40727548;40727548;40727548;40733786;40733786;40733786;40733786;407…	+;+;+;+;+;+;+;+;+;+;+;+;+;+;+;+;+;+;+;+;+;+;+;+;+;+;+;+;+;+;+;+;+;+;+;+;+;+;+;+;+;+;+;+;+;+;+;+;+;+;+;+;+	5580	0.381382	1.69475	1.27341
Epsti1	14;14;14;14;14;14;14;14;14;14;14;14;14;14;14;14;14;14;14;14	77904239;77904407;77927170;77927170;77928747;77928747;77931247;77931247;77932148;77932148;77939862;77939862;77963632;77963632;77963727;77972578;77974517;77986692;77994532;78001971	77904664;77904664;77927228;77927228;77928830;77928830;77931320;77931320;77932231;77932231;77939935;77939935;77963725;77963725;77964174;77972610;77974597;77986765;77994631;78002656	+;+;+;+;+;+;+;+;+;+;+;+;+;+;+;+;+;+;+;+	2317	0.19003	1.52054	0.659346
Etv1	12;12;12;12;12;12;12;12;12;12;12;12;12;12;12;12;12;12;12;12;12;12;12;12;12;12;12;12;12;12;12;12;12;12;12;12;12;12;12;12;12;12;12;12;12;12;12;12;12;12;12;12;12;12;12;12;12;12;12;12;12;12;12;12;12;12;12;12;12;12;12;12;12;12;12;12;12;12;12;12;12;12;12;12;12;12;12;12;12;12;12;12;12;12;12;12;12;12;12;12;12;12;12;12;12;12;12;12;12;12;12;12;12;12;12	38779380;38780082;38780284;38780319;38780349;38780520;38780848;38780848;38780848;38780848;38780848;38780848;38781113;38781129;38781799;38781799;38781799;38781799;38781799;38781799;38781799;38783238;38783238;38783238;38783238;38783238;38783238;38783238;38783470;38783481;38783509;38793171;38793171;38793171;38793171;38793171;38793171;38793171;38824681;38827778;38827778;38827778;38827778;38827778;388…	38779479;38780421;38780421;38780715;38780421;38780715;38780979;38780979;38780979;38780979;38780979;38780979;38781886;38781302;38781886;38781886;38781813;38781886;38781886;38781886;38781886;38783285;38783285;38783285;38783285;38783285;38783285;38783285;38783802;38783802;38783802;38793224;38793224;38793224;38793224;38793224;38793224;38793224;38824758;38827907;38827907;38827907;38827907;38827907;388…	+;+;+;+;+;+;+;+;+;+;+;+;+;+;+;+;+;+;+;+;+;+;+;+;+;+;+;+;+;+;+;+;+;+;+;+;+;+;+;+;+;+;+;+;+;+;+;+;+;+;+;+;+;+;+;+;+;+;+;+;+;+;+;+;+;+;+;+;+;+;+;+;+;+;+;+;+;+;+;+;+;+;+;+;+;+;+;+;+;+;+;+;+;+;+;+;+;+;+;+;+;+;+;+;+;+;+;+;+;+;+;+;+;+;+	5889	0.0685359	0.236151	0.253384
Fabp5	3;3;3;3;3;3	10012548;10012605;10014971;10015472;10016067;10016067	10012718;10015573;10015143;10015573;10016607;10016335	+;+;+;+;+;+	3567	6.89189	30.4278	18.7451
Fam126a	5;5;5;5;5;5;5;5;5;5;5;5;5;5;5;5;5;5;5;5;5;5;5;5;5;5;5;5;5;5;5;5;5;5;5;5;5;5;5;5;5;5;5;5;5;5;5;5;5;5;5;5;5	23915276;23915277;23915812;23922796;23960931;23964479;23964481;23966134;23966134;23979488;23979488;23979488;23979488;23980487;23980487;23980487;23980487;23981903;23983150;23983150;23983150;23983150;23985745;23985745;23985745;23985745;23986138;23986138;23986138;23986138;23986734;23986734;23986734;23986734;23987885;23987885;23987885;23987885;23988850;23991736;23991736;23991736;23991736;23991736;239…	23915537;23915537;23915941;23922904;23965358;23965358;23965358;23966431;23966431;23979647;23979647;23979647;23979647;23980574;23980574;23980574;23980574;23985029;23983266;23983266;23983266;23983266;23985840;23985840;23985840;23985840;23986253;23986253;23986253;23986253;23986814;23986814;23986814;23986814;23988064;23988064;23988064;23988064;23988995;23991837;23991837;23991837;23991837;23991837;240…	-;-;-;-;-;-;-;-;-;-;-;-;-;-;-;-;-;-;-;-;-;-;-;-;-;-;-;-;-;-;-;-;-;-;-;-;-;-;-;-;-;-;-;-;-;-;-;-;-;-;-;-;-	10117	0.536756	1.25242	1.23612
Fam187b	7;7;7;7;7;7;7	30973790;30973804;30977043;30981870;30988980;30988980;30988980	30976310;30974275;30977780;30982630;30989726;30989462;30989720	+;+;+;+;+;+;+	4767	0.554184	1.20583	1.24464
Fam46a	9;9;9;9;9;9	85320439;85320439;85326259;85326259;85326988;85327043	85325233;85325233;85326805;85326805;85327124;85327348	-;-;-;-;-;-	5703	2.38692	8.86356	4.84671
Fam46c	3;3;3;3;3;3;3;3;3	100451628;100451631;100451943;100451943;100466274;100468057;100489094;100489094;100489094	100451848;100451848;100452076;100452076;100466375;100473465;100489194;100489198;100489324	-;-;-;-;-;-;-;-;-	6097	1.40616	2.99564	3.13301
Fam47e	5;5;5;5;5;5;5;5;5;5;5;5;5;5;5;5;5;5;5;5;5;5;5;5;5;5;5;5;5;5;5;5;5;5;5;5;5	92555069;92555102;92562221;92565928;92565928;92571477;92571536;92571537;92571543;92571556;92574569;92574569;92574569;92574569;92574569;92574569;92578472;92578472;92579604;92579604;92579604;92579604;92585256;92585256;92585256;92585256;92585256;92587516;92587516;92587516;92587516;92590516;92590516;92590516;92590516;92590516;92590516	92555147;92555147;92562557;92566061;92566061;92571710;92571710;92571710;92571710;92571710;92574713;92574713;92574713;92574713;92574713;92574713;92578573;92578573;92579684;92579684;92579684;92579684;92585411;92585384;92585411;92585411;92585411;92587593;92587593;92587593;92587593;92590731;92591279;92591278;92590660;92590882;92590760	+;+;+;+;+;+;+;+;+;+;+;+;+;+;+;+;+;+;+;+;+;+;+;+;+;+;+;+;+;+;+;+;+;+;+;+;+	2110	1.6346	3.77882	3.40126
Fasn	11;11;11;11;11;11;11;11;11;11;11;11;11;11;11;11;11;11;11;11;11;11;11;11;11;11;11;11;11;11;11;11;11;11;11;11;11;11;11;11;11;11;11;11;11;11;11;11;11;11;11;11;11;11;11;11;11;11;11;11;11;11;11;11;11;11;11;11;11;11;11;11;11;11;11;11;11;11;11;11;11;11;11;11;11;11;11;11;11;11;11;11;11;11;11;11	120805846;120807105;120807547;120808075;120808075;120808075;120808502;120808502;120808564;120808719;120808719;120808719;120809025;120809025;120809025;120809426;120809426;120809426;120809804;120809804;120810130;120810130;120810437;120810437;120810641;120810641;120810912;120810912;120811291;120811291;120811600;120811600;120811838;120811838;120812039;120812039;120812300;120812300;120812658;120812658…	120807991;120807991;120807991;120808605;120808326;120808326;120808600;120808600;120808600;120808939;120808939;120808939;120809252;120809252;120809252;120809701;120809614;120809614;120810049;120810049;120810281;120810281;120810528;120810528;120810792;120810792;120811113;120811113;120811514;120811514;120811722;120811722;120811957;120811957;120812217;120812217;120812450;120812450;120812861;120812861…	-;-;-;-;-;-;-;-;-;-;-;-;-;-;-;-;-;-;-;-;-;-;-;-;-;-;-;-;-;-;-;-;-;-;-;-;-;-;-;-;-;-;-;-;-;-;-;-;-;-;-;-;-;-;-;-;-;-;-;-;-;-;-;-;-;-;-;-;-;-;-;-;-;-;-;-;-;-;-;-;-;-;-;-;-;-;-;-;-;-;-;-;-;-;-;-	10947	2.99982	7.67596	7.45806
Fcer1g	1;1;1;1;1;1;1;1;1;1;1;1	171229572;171229579;171230067;171230067;171230922;171230996;171231051;171231177;171231177;171234197;171234197;171234197	171229927;171229927;171230087;171230087;171231031;171231031;171231268;171231268;171231268;171234307;171234339;171234365	-;-;-;-;-;-;-;-;-;-;-;-	874	1.00755	4.63211	2.68289
Fcgr1	3;3;3;3;3;3;3;3;3;3;3	96282909;96285809;96285834;96286984;96286984;96292253;96292470;96293519;96293519;96293905;96293905	96284619;96286093;96286093;96287232;96287232;96292510;96292510;96293539;96293539;96293933;96293969	-;-;-;-;-;-;-;-;-;-;-	2589	0.0708606	1.61146	0.439126
Fcgr3	1;1;1;1;1;1;1;1;1;1;1;1;1;1;1;1;1;1	171051174;171051175;171051195;171053939;171053939;171053939;171057691;171057691;171057691;171057828;171058586;171058586;171058586;171059269;171059269;171059269;171059627;171064754	171051852;171051852;171051852;171054193;171054193;171054193;171057945;171058054;171057948;171057945;171058606;171058606;171058606;171059403;171059394;171059403;171059726;171064935	-;-;-;-;-;-;-;-;-;-;-;-;-;-;-;-;-;-	1736	1.09568	4.18347	3.42796
Fcgr4	1;1;1;1;1	171018920;171019528;171019896;171025544;171029137	171019019;171019548;171020150;171025798;171029761	+;+;+;+;+	1256	0.233705	2.95264	1.92349
Fcna	2;2;2;2;2;2;2;2;2;2;2;2;2;2;2;2;2;2	25624666;25624965;25625213;25625213;25625434;25625434;25626012;25626088;25626256;25626256;25626641;25626641;25626967;25626967;25627278;25627278;25627436;25627749	25625088;25625088;25625347;25625347;25625563;25625563;25626139;25626139;25626291;25626291;25626676;25626676;25627002;25627002;25627288;25627331;25627549;25628030	-;-;-;-;-;-;-;-;-;-;-;-;-;-;-;-;-;-	1374	5.60789	25.5062	13.8595
Fcnaos	2;2;2;2;2;2;2;2;2;2;2;2;2;2;2;2;2;2;2;2;2;2;2;2;2;2	25607892;25609318;25616007;25616584;25625270;25625270;25627293;25627293;25627656;25627656;25627670;25629019;25629019;25629019;25630673;25630673;25630673;25630673;25631195;25631195;25631195;25631195;25631639;25631639;25631639;25631639	25607964;25609469;25616179;25617188;25625320;25625320;25627369;25627369;25627709;25627709;25627709;25629111;25629111;25629111;25630782;25630782;25630782;25630782;25631300;25631262;25631262;25631262;25631761;25631759;25631758;25631758	+;+;+;+;+;+;+;+;+;+;+;+;+;+;+;+;+;+;+;+;+;+;+;+;+;+	1617	2.35988	8.71512	4.81177
Fdps	3;3;3;3;3;3;3;3;3;3;3;3;3;3;3;3;3;3;3;3;3;3;3;3;3;3;3;3;3;3;3;3;3;3;3;3;3;3;3;3;3	89093588;89093588;89093749;89094231;89094231;89094231;89094452;89094452;89094452;89094860;89094860;89094860;89095014;89095014;89095014;89095056;89095354;89095354;89095354;89095354;89095364;89095599;89095599;89095599;89095599;89095599;89095599;89098939;89099300;89099300;89099300;89099300;89100669;89100669;89100669;89100669;89100921;89100921;89101756;89101862;89101862	89093843;89093843;89093843;89094365;89094365;89094365;89094577;89094529;89094529;89094932;89094932;89094932;89095102;89095102;89095102;89095102;89095476;89095476;89095476;89095476;89095476;89095983;89095679;89095679;89095679;89095679;89095679;89101891;89099440;89099440;89099440;89099440;89100831;89100831;89100831;89100831;89101315;89101136;89101852;89101959;89101888	-;-;-;-;-;-;-;-;-;-;-;-;-;-;-;-;-;-;-;-;-;-;-;-;-;-;-;-;-;-;-;-;-;-;-;-;-;-;-;-;-	4208	1.6567	4.33673	4.13705
Fes	7;7;7;7;7;7;7;7;7;7;7;7;7;7;7;7;7;7;7;7;7;7;7;7;7;7;7;7;7;7;7;7;7;7;7;7;7;7;7;7;7;7;7;7;7;7;7;7;7;7;7;7;7;7;7;7;7;7;7;7;7;7;7;7;7;7;7;7;7;7;7;7;7;7;7;7;7;7;7;7;7;7;7;7;7;7;7;7;7;7;7;7;7;7;7;7;7;7;7;7;7;7	80377756;80377758;80377758;80377758;80377763;80377764;80377773;80378542;80378542;80378542;80378542;80378629;80378778;80378778;80378778;80378778;80378778;80378778;80379611;80379611;80379611;80379611;80379611;80379611;80379611;80379818;80379818;80379818;80379818;80379818;80379818;80380209;80380209;80380209;80380209;80380839;80380839;80380839;80381165;80381165;80381165;80381165;80381165;80381601;803…	80378074;80378935;80378074;80378015;80378074;80378664;80378074;80378664;80378664;80378664;80378664;80378664;80378935;80378935;80378935;80378935;80378935;80378935;80379734;80379734;80379734;80379734;80379734;80379630;80379704;80379912;80380892;80379912;80379912;80380436;80379912;80380327;80380327;80380327;80380892;80380892;80380892;80380892;80381287;80381810;80381287;80381287;80381287;80381810;803…	-;-;-;-;-;-;-;-;-;-;-;-;-;-;-;-;-;-;-;-;-;-;-;-;-;-;-;-;-;-;-;-;-;-;-;-;-;-;-;-;-;-;-;-;-;-;-;-;-;-;-;-;-;-;-;-;-;-;-;-;-;-;-;-;-;-;-;-;-;-;-;-;-;-;-;-;-;-;-;-;-;-;-;-;-;-;-;-;-;-;-;-;-;-;-;-;-;-;-;-;-;-	5074	0.578504	1.38868	1.30237
Fgl2	5;5	21372642;21375254	21373308;21378374	+;+	3788	0.329333	1.36246	0.82536
Filip1l	16;16;16;16;16;16;16;16;16;16;16;16	57353093;57353277;57506599;57506599;57507549;57507549;57513266;57513266;57514906;57549242;57569650;57569650	57353458;57353458;57506854;57506854;57507722;57507722;57513444;57513444;57515690;57549339;57572804;57573126	+;+;+;+;+;+;+;+;+;+;+;+	5335	1.05914	4.98176	2.9368
Fmo2	1;1;1;1;1;1;1;1;1;1;1;1;1;1;1;1;1;1;1;1;1;1;1;1;1;1;1;1;1;1;1;1;1	162874317;162874322;162876436;162878013;162878013;162878013;162878039;162880382;162880382;162880382;162880576;162881990;162881990;162881990;162886309;162886309;162886309;162887568;162887568;162887568;162888078;162888696;162888696;162888696;162897681;162898174;162898174;162898174;162898174;162898394;162898672;162898672;162898672	162877079;162877079;162877079;162878085;162878085;162878085;162878085;162880737;162880737;162880737;162880731;162882189;162882189;162882189;162886451;162886515;162886451;162887730;162887730;162887730;162888884;162888884;162888884;162888884;162898311;162898311;162898311;162898665;162898311;162898484;162898726;162898720;162898712	-;-;-;-;-;-;-;-;-;-;-;-;-;-;-;-;-;-;-;-;-;-;-;-;-;-;-;-;-;-;-;-;-	5609	1.25598	8.02222	6.42278
Folr2	7;7;7;7;7;7;7;7;7;7;7;7;7;7;7;7;7;7;7;7;7;7;7	101839988;101839990;101840248;101840398;101840591;101840591;101840591;101840591;101840812;101840812;101840812;101840812;101840915;101843386;101843668;101843668;101843668;101843668;101845204;101845204;101845204;101856845;101857104	101840461;101840461;101840461;101840461;101840726;101840726;101840726;101840726;101841176;101840997;101840997;101840997;101840997;101843418;101843824;101843820;101843824;101843824;101845304;101845331;101845317;101857006;101857194	-;-;-;-;-;-;-;-;-;-;-;-;-;-;-;-;-;-;-;-;-;-;-	1546	0.901864	2.83856	1.88441
Fpr1	17;17	17876471;17883883	17877736;17883940	-;-	1324	0.277127	1.6806	1.01969
Fut11	14;14;14	20694968;20695788;20698211	20695698;20696413;20700197	+;+;+	3344	1.4703	3.2346	3.05983
Fyb	15;15;15;15;15;15;15;15;15;15;15;15;15;15;15;15;15;15;15;15;15;15;15;15;15;15;15;15;15;15;15;15;15;15;15;15;15;15;15;15;15;15;15;15;15	6579871;6579892;6585002;6619594;6619594;6619594;6619594;6630072;6630072;6630072;6632265;6632265;6632265;6632777;6632777;6634796;6634796;6638807;6640441;6642557;6643686;6643694;6644762;6646059;6646637;6646637;6648854;6648854;6648854;6651804;6651804;6651804;6652382;6652382;6654511;6658532;6658532;6658532;6660405;6660683;6660683;6660683;6663150;6663150;6663150	6581046;6581046;6585178;6619750;6620608;6619750;6619750;6630118;6630118;6630118;6632392;6632284;6632284;6632811;6632811;6634806;6634916;6638966;6640585;6642579;6643763;6643763;6644899;6646662;6646662;6646662;6648920;6648920;6648920;6651868;6651903;6651903;6652544;6652544;6654849;6658565;6658565;6658565;6660714;6660714;6660876;6660714;6663251;6663313;6663304	+;+;+;+;+;+;+;+;+;+;+;+;+;+;+;+;+;+;+;+;+;+;+;+;+;+;+;+;+;+;+;+;+;+;+;+;+;+;+;+;+;+;+;+;+	5186	1.06834	4.99522	3.00063
Gab2	7;7;7;7;7;7;7;7;7;7;7;7;7;7;7;7;7;7;7;7	97081586;97081776;97223473;97223473;97271802;97271802;97298828;97298828;97300299;97300299;97301371;97301371;97302369;97302369;97303024;97303027;97304150;97304150;97304876;97304876	97081906;97081906;97223773;97223773;97272042;97272042;97299402;97299402;97300369;97300369;97301635;97301635;97302459;97302459;97303129;97303129;97304275;97304275;97305036;97308946	+;+;+;+;+;+;+;+;+;+;+;+;+;+;+;+;+;+;+;+	6168	0.214153	0.561167	0.495365
Gamt	10;10;10;10;10;10;10;10;10;10;10;10;10;10;10;10;10;10;10	80258151;80258164;80258577;80258793;80258940;80258940;80259177;80259177;80259177;80259177;80259601;80259601;80259601;80259768;80259768;80259768;80260721;80260721;80260721	80258457;80258457;80259050;80259050;80259098;80259050;80259244;80259289;80259244;80259244;80259664;80259664;80259664;80259913;80259913;80259913;80260918;80261012;80260968	-;-;-;-;-;-;-;-;-;-;-;-;-;-;-;-;-;-;-	1444	16.313	47.6833	32.8708
Gbe1	16;16;16;16;16;16;16;16;16;16;16;16;16;16;16;16;16;16;16;16;16;16;16;16;16;16;16;16;16;16;16;16;16;16;16;16;16;16;16;16;16;16;16;16;16;16;16;16;16;16;16;16;16;16;16;16;16;16;16;16;16;16;16;16;16;16;16;16;16;16;16;16;16;16;16;16;16;16;16;16;16;16;16	70313949;70314063;70314064;70314064;70314087;70314134;70360858;70360858;70360858;70360858;70360858;70360858;70401734;70401734;70401734;70401734;70401734;70433545;70433545;70433545;70433549;70433549;70434514;70434514;70434514;70434514;70434514;70436928;70436928;70436928;70436928;70436928;70441110;70441110;70441110;70441110;70441110;70478306;70478306;70478306;70478306;70478306;70483821;70483821;704…	70314295;70314295;70314295;70314295;70314295;70314295;70361027;70361027;70361027;70361650;70361027;70361027;70401849;70401849;70401853;70401849;70401853;70433670;70433670;70433670;70433670;70433670;70434649;70434649;70434649;70434649;70434649;70437018;70437018;70437018;70437018;70437018;70441319;70441319;70441319;70441319;70441319;70478421;70478421;70478421;70478421;70478421;70483948;70483948;704…	+;+;+;+;+;+;+;+;+;+;+;+;+;+;+;+;+;+;+;+;+;+;+;+;+;+;+;+;+;+;+;+;+;+;+;+;+;+;+;+;+;+;+;+;+;+;+;+;+;+;+;+;+;+;+;+;+;+;+;+;+;+;+;+;+;+;+;+;+;+;+;+;+;+;+;+;+;+;+;+;+;+;+	5352	9.99558	22.1157	20.8043
Gbp11	5;5;5;5;5;5;5;5;5;5;5;5;5;5;5;5;5;5	105323042;105324907;105325430;105326456;105326480;105327335;105327335;105328377;105328377;105330952;105330952;105331334;105331334;105341999;105341999;105343746;105343746;105346414	105324000;105325100;105325532;105326662;105326662;105327615;105327615;105328622;105328622;105331148;105331148;105331443;105331443;105342126;105342126;105343929;105343953;105346472	-;-;-;-;-;-;-;-;-;-;-;-;-;-;-;-;-;-	2692	1.47203	11.9776	4.90952
Gbp2	3;3;3;3;3;3;3;3;3;3;3;3;3;3;3;3;3	142620602;142620635;142623670;142623670;142624575;142624575;142625513;142625553;142629969;142629969;142630516;142630516;142631993;142633338;142635222;142635783;142637383	142620808;142620808;142623883;142623883;142624702;142624702;142625622;142625622;142630165;142630165;142630585;142630758;142632273;142633550;142635324;142635976;142638008	+;+;+;+;+;+;+;+;+;+;+;+;+;+;+;+;+	2516	1.25416	3.02164	3.40312
Gbp2b	3;3;3;3;3;3;3;3;3;3;3	142594847;142598132;142598995;142600486;142603558;142604076;142606726;142608110;142610952;142611350;142618095	142594911;142598335;142599122;142600595;142603754;142604318;142607006;142608322;142611054;142611543;142619179	+;+;+;+;+;+;+;+;+;+;+	2823	1.02679	6.25092	2.78133
Gbp3	3;3;3;3;3;3;3;3;3;3;3;3;3;3;3;3;3;3;3;3;3;3;3;3;3;3;3;3;3;3;3;3;3;3;3;3;3;3;3;3;3;3;3;3;3;3;3;3;3;3;3	142560026;142560052;142560143;142560145;142560175;142560411;142560496;142560721;142560721;142560721;142561234;142561740;142561740;142561740;142561740;142561740;142561740;142561740;142564106;142564106;142564106;142564106;142564106;142564106;142564948;142564948;142564948;142564948;142564948;142565247;142565247;142565247;142565247;142566346;142566346;142566346;142567547;142567547;142567547;142569048…	142560283;142560283;142560283;142560283;142560283;142560690;142560690;142560858;142560932;142560858;142561279;142561935;142561935;142561935;142561935;142561935;142561935;142561935;142564233;142564233;142564233;142564183;142564233;142564233;142565054;142565057;142565057;142565057;142565057;142565508;142565443;142565443;142565443;142566591;142566591;142566591;142567827;142567827;142567827;142569260…	+;+;+;+;+;+;+;+;+;+;+;+;+;+;+;+;+;+;+;+;+;+;+;+;+;+;+;+;+;+;+;+;+;+;+;+;+;+;+;+;+;+;+;+;+;+;+;+;+;+;+	3265	0.584369	3.74827	1.71927
Gbp5	3;3;3;3;3;3;3;3;3;3;3;3;3;3;3;3;3;3;3;3;3;3;3;3;3;3;3;3;3;3;3;3;3;3;3;3;3;3;3;3;3;3;3;3;3;3	142493978;142496900;142496934;142496942;142500553;142500553;142500553;142500553;142501262;142501262;142501262;142502796;142503016;142503016;142503016;142503723;142503723;142503723;142503821;142504252;142504252;142504252;142504252;142505382;142505382;142505382;142505382;142506705;142506705;142506705;142506705;142506705;142507690;142507690;142507690;142507690;142507915;142507915;142507915;142507915…	142494125;142496995;142496995;142496995;142500746;142500746;142500746;142500746;142501389;142501389;142501389;142505662;142503125;142503125;142503125;142503922;142503922;142503922;142503922;142504494;142504494;142504494;142504494;142505662;142505662;142505662;142505662;142507344;142506917;142506917;142506917;142506917;142507792;142507792;142507792;142507792;142508096;142508096;142508096;142508096…	+;+;+;+;+;+;+;+;+;+;+;+;+;+;+;+;+;+;+;+;+;+;+;+;+;+;+;+;+;+;+;+;+;+;+;+;+;+;+;+;+;+;+;+;+;+	6637	0.243247	0.577389	0.685187
Gbp7	3;3;3;3;3;3;3;3;3;3;3;3;3;3;3;3;3;3;3;3;3;3	142530342;142530342;142534499;142534517;142536297;142536297;142538012;142538012;142538722;142538722;142541356;142541356;142542849;142542849;142543922;142543922;142545450;142545450;142545862;142545862;142546320;142546320	142530439;142530439;142534712;142534712;142536424;142536424;142538121;142538121;142538918;142538918;142541601;142541601;142543129;142543129;142544134;142544134;142545552;142545552;142546055;142546055;142550149;142547050	+;+;+;+;+;+;+;+;+;+;+;+;+;+;+;+;+;+;+;+;+;+	5614	1.32675	5.39476	3.69582
Gdap10	12;12	32821872;32826018	32825987;32826904	+;+	5003	0.535376	2.7581	1.65461
Gfra2	14;14;14;14;14;14;14;14;14	70890130;70895772;70901489;70925718;70966207;70966997;70968244;70977256;70978374	70890894;70896086;70901572;70926072;70966316;70967137;70968416;70977309;70979838	+;+;+;+;+;+;+;+;+	3462	0.0423935	2.59767	0.389967
Ggt7	2;2;2;2;2;2;2;2;2;2;2;2;2;2;2;2;2;2;2;2;2;2;2;2;2;2;2;2;2;2;2;2;2;2;2;2;2;2;2	155490379;155493609;155494846;155494884;155495642;155495642;155495874;155495874;155495953;155498763;155498763;155498763;155499014;155499014;155499014;155500703;155500703;155500765;155502636;155502636;155502636;155503128;155503128;155503412;155503412;155504704;155504704;155504773;155505955;155505955;155505955;155506326;155506326;155506326;155506939;155514629;155514629;155517277;155518041	155491116;155493708;155494983;155494983;155495759;155495759;155496023;155496023;155496023;155498851;155498851;155498851;155499159;155499141;155499141;155500790;155500790;155500790;155503133;155502832;155502832;155503201;155503201;155503479;155503479;155504821;155504821;155504821;155506106;155506106;155506106;155506561;155506561;155506561;155506954;155514826;155514848;155517400;155518237	-;-;-;-;-;-;-;-;-;-;-;-;-;-;-;-;-;-;-;-;-;-;-;-;-;-;-;-;-;-;-;-;-;-;-;-;-;-;-	3264	9.53262	22.5533	19.375
Glb1	9;9;9;9;9;9;9;9;9;9;9;9;9;9;9;9;9;9;9;9;9;9;9;9;9;9;9;9;9;9;9	114401076;114401108;114416961;114420353;114420353;114421689;114421689;114423945;114423945;114430313;114430313;114434401;114434401;114437739;114437739;114437941;114437941;114443009;114443009;114450597;114450597;114454188;114454188;114456431;114456431;114459594;114459594;114464044;114464044;114473838;114473838	114401269;114401269;114417130;114420503;114420503;114421749;114421749;114424039;114424039;114430493;114430493;114434459;114434459;114437860;114437860;114437981;114437981;114443212;114443121;114450671;114450671;114454277;114454277;114456547;114456547;114459725;114459725;114464298;114464298;114474898;114474377	+;+;+;+;+;+;+;+;+;+;+;+;+;+;+;+;+;+;+;+;+;+;+;+;+;+;+;+;+;+;+	3008	0.927049	2.21919	2.40948
Gm10642	9	70656251	70657860	+	1610	0.911593	2.18825	2.14051
Gm10717	9;9;9;9;9;9;9;9;9;9;9;9;9;9;9;9;9;9;9;9;9;9;9;9;9;9;9;9;9;9;9;9;9;9;9;9;9;9	3025417;3026049;3026151;3026188;3026263;3027523;3027523;3027593;3027593;3027638;3027922;3028378;3028448;3028604;3028808;3029195;3029232;3029307;3029312;3030337;3030404;3030498;3030568;3030638;3030947;3030947;3030952;3030952;3031996;3032085;3032085;3032155;3032155;3032464;3032469;3032700;3032951;3033165	3025968;3026055;3026183;3026469;3026387;3027588;3027588;3027874;3028075;3027841;3027930;3028494;3028454;3028728;3029011;3029227;3029559;3029309;3029431;3030399;3030886;3030652;3030633;3030946;3030949;3030949;3031071;3031071;3032169;3032150;3032150;3032637;3032634;3032466;3032588;3032822;3032957;3033289	+;+;+;+;+;+;+;+;+;+;+;+;+;+;+;+;+;+;+;+;+;+;+;+;+;+;+;+;+;+;+;+;+;+;+;+;+;+	3856	0.0213146	0.280351	1.1847
Gm10718	9;9;9;9;9	3023547;3023617;3024412;3024880;3025094	3023612;3023944;3024566;3024886;3025218	+;+;+;+;+	681	0.0851288	3.08771	11.2208
Gm10800	2;2;2;2;2	98666547;98666735;98667066;98667079;98667233	98666669;98667040;98667077;98667228;98667301	-;-;-;-;-	660	6.16975	63.7424	298.078
Gm10801	2;2;2;2	98662237;98663120;98663806;98663961	98662522;98663124;98663895;98664083	+;+;+;+	504	0.436805	6.12199	24.3155
Gm11168	9;9;9;9;9;9;9;9;9;9;9;9;9;9;9;9;9;9;9;9	3003346;3003416;3003580;3003650;3003959;3004457;3004527;3004572;3004572;3004856;3004856;3005070;3005070;3005070;3005075;3005159;3005229;3006181;3006541;3006843	3003411;3003697;3003645;3003782;3004107;3004522;3005009;3004775;3004775;3004862;3004862;3005194;3005072;3005194;3005194;3005224;3005361;3006536;3006551;3006948	+;+;+;+;+;+;+;+;+;+;+;+;+;+;+;+;+;+;+;+	1892	0.13769	0.737979	5.04302
Gm11695	11;11;11	115462045;115462704;115463349	115462233;115462815;115463454	-;-;-	407	1.08182	3.94846	3.14253
Gm12250	11	58187739	58189012	+	1274	0.403204	1.55249	1.2828
Gm12798	4;4;4	101403081;101406988;101407629	101403457;101407048;101407856	+;+;+	666	1.54259	3.52661	3.20072
Gm12999	4;4	132532687;132533338	132532907;132533601	+;+	485	4.38786	10.5775	9.66948
Gm13449	2;2;2	34993973;35011809;35012450	34994093;35011921;35013446	+;+;+	1231	10.0149	23.8498	20.78
Gm14221	2;2;2;2;2	160568379;160574684;160605996;160619832;160619862	160568442;160574819;160607322;160619971;160619971	-;-;-;-;-	1667	0.880423	3.41115	1.79025
Gm14295	2;2;2;2;2;2;2;2;2;2	176798612;176802181;176802233;176807362;176807362;176807362;176807695;176807695;176807695;176808910	176798718;176802235;176802235;176807488;176807488;176807488;176807755;176808618;176807759;176811223	+;+;+;+;+;+;+;+;+;+	3527	0.279842	0.773177	0.678528
Gm14387	2;2;2	175086501;175086839;175088053	175086628;175086899;175089918	+;+;+	2055	0.720263	2.26361	1.53142
Gm14391	2;2;2;2;2;2;2;2;2;2;2;2;2;2;2;2;2;2;2;2;2;2;2;2;2;2	175191065;175194914;175194914;175194914;175196942;175197545;175197545;175197545;175197545;175197674;175197807;175197807;175197807;175197807;175197807;175201653;175203059;175203059;175203059;175203059;175203059;175206781;175206781;175206781;175206781;175206781	175191171;175196387;175196387;175196387;175197605;175197605;175197605;175197605;175197605;175203113;175197933;175197933;175197933;175197933;175197933;175201754;175203113;175203113;175203113;175203061;175203113;175206899;175206917;175206876;175206917;175206903	-;-;-;-;-;-;-;-;-;-;-;-;-;-;-;-;-;-;-;-;-;-;-;-;-;-	7822	0.135189	0.889041	0.393797
Gm14400	2;2;2	177225473;177228574;177228837	177227419;177228634;177228963	-;-;-	2135	0.83351	9.22033	3.58642
Gm14419	2;2;2;2;2;2;2;2;2;2;2;2;2;2;2	177000956;177000977;177004501;177004501;177004553;177009681;177009681;177009681;177009681;177010014;177010014;177010014;177010014;177010636;177011230	177001046;177001046;177004555;177004555;177004555;177009807;177009807;177009807;177009807;177010074;177010078;177010074;177010513;177010984;177012787	+;+;+;+;+;+;+;+;+;+;+;+;+;+;+	2680	0.143481	1.11763	0.728324
Gm14421	2;2;2	177053516;177056450;177056724	177055297;177056510;177056838	-;-;-	1958	0.604156	5.40967	2.69309
Gm15337	18;18;18;18	39367038;39370995;39383081;39389299	39370316;39371275;39383281;39389425	-;-;-;-	3888	0.188743	0.619993	0.529996
Gm15922	7;7;7;7;7;7;7;7;7;7	3731630;3735470;3735752;3736316;3736840;3737275;3738719;3739172;3739638;3739828	3733157;3735520;3736054;3736612;3737148;3737559;3739024;3739456;3739673;3739889	-;-;-;-;-;-;-;-;-;-	3462	0.296755	1.39007	0.882351
Gm15962	19;19;19;19;19;19;19;19	12706055;12715790;12718123;12718123;12718472;12718472;12721097;12721097	12706183;12716163;12718302;12718302;12718516;12718516;12721203;12721247	-;-;-;-;-;-;-;-	879	17.4692	48.8702	44.7435
Gm16675	8;8;8;8;8;8;8;8	46668808;46674924;46678707;46730970;46736272;46736272;46739162;46739162	46670714;46675028;46678861;46731862;46736343;46736343;46739508;46739515	-;-;-;-;-;-;-;-	3486	0.357864	1.0727	0.93763
Gm16793	8;8;8	35582503;35584328;35588838	35583762;35584612;35588972	-;-;-	1680	0.393124	1.14052	0.930495
Gm16907	13;13;13	63289601;63292692;63296834	63291459;63292835;63297147	-;-;-	2317	0.316717	1.04037	0.88935
Gm17971	1	55066264	55067069	+	806	0.182092	1.80211	2.33621
Gm19619	5;5;5;5;5;5	91257571;91264633;91273737;91279724;91281420;91282996	91258625;91264709;91274001;91280902;91281618;91283421	-;-;-;-;-;-	3201	0.298026	0.772366	0.821329
Gm20481	17;17	34969912;34971950	34970288;34972136	+;+	564	7.88219	69.7078	35.5381
Gm20496	17;17;17;17;17	34199316;34200019;34200027;34203928;34205310	34199574;34200257;34200257;34203952;34205449	-;-;-;-;-	663	8.52264	27.9052	18.7554
Gm20649	9;9;9	74848463;74849132;74889306	74848951;74849211;74891476	+;+;+	2740	1.52659	8.56071	6.92407
Gm20760	4	146932742	146933389	+	648	1.2457	5.18219	4.00238
Gm21738	14;14;14;14;14;14	19415857;19416131;19416861;19417133;19418767;19418865	19415981;19416137;19417015;19417366;19418860;19418930	-;-;-;-;-;-	681	0.457972	6.18993	21.1697
Gm24233	12	59134072	59134193	+	122	3.00751	11.1458	12.231
Gm25994	11	106783171	106783271	-	101	47.7717	104.695	102.363
Gm26716	4;4	130824394;130826092	130824586;130826313	-;-	415	1.06096	8.34043	4.96536
Gm26749	17;17;17;17	74575381;74608047;74611433;74616822	74575580;74609380;74611533;74617119	-;-;-;-	1933	1.1389	3.29347	3.56567
Gm26789	10;10	63292286;63293688	63292681;63295793	-;-	2502	0.703916	1.6675	1.59038
Gm26870	9;9;9;9;9;9;9;9;9	3000282;3004606;3013990;3017867;3017875;3024048;3034864;3037728;3037728	3000630;3004840;3014357;3018084;3018082;3024631;3035215;3038313;3038310	-;-;-;-;-;-;-;-;-	2692	0.213444	2.21106	12.0386
Gm28513	1;1	153743552;153749030	153743869;153749324	-;-	613	9.21779	33.5763	52.8573
Gm28836	1;1	21250359;21271415	21250812;21271593	-;-	633	2.20266	10.155	4.49011
Gm29438	6	72104201	72106813	+	2613	0.0842517	1.14723	0.516672
Gm30238	12	112690986	112693588	-	2603	0.140959	0.522393	0.518657
Gm37755	1	66812315	66814493	+	2179	0.437807	1.36155	0.92937
Gm38372	1	7148110	7152137	+	4028	0.127528	1.15085	0.441013
Gm4070	7;7;7;7;7;7;7;7;7;7;7	105895139;105895139;105903519;105913614;105914494;105914494;105927032;105953855;105953855;105953855;105953855	105903847;105903847;105903847;105913753;105914547;105914547;105927290;105953967;105953953;105953940;105953958	-;-;-;-;-;-;-;-;-;-;-	9275	0.16085	0.82247	0.741817
Gm42547	6	28211008	28214805	-	3798	1.06268	2.24581	2.16087
Gm42585	5	25369020	25373039	+	4020	0.182545	0.461258	0.512593
Gm42796	5	87355835	87356921	+	1087	1.14767	5.34499	5.16414
Gm43305	14	54292443	54297343	-	4901	0.0672293	0.229654	0.335345
Gm43621	2	36248709	36250730	-	2022	0.362924	1.34499	0.948819
Gm43738	3;3;3;3;3;3;3;3;3;3;3;3;3;3;3;3;3;3;3	89081939;89084509;89086773;89087719;89088800;89089000;89089177;89089485;89089669;89092032;89093647;89094452;89094860;89095014;89095354;89095599;89099300;89100669;89100921	89082005;89084650;89086895;89088268;89088846;89089105;89089351;89089561;89089767;89092156;89093843;89094529;89094932;89095102;89095476;89095679;89099440;89100831;89101099	-;-;-;-;-;-;-;-;-;-;-;-;-;-;-;-;-;-;-	2635	2.95204	6.82005	7.01122
Gm44335	9	44334965	44335105	-	141	6.24538	16.6576	15.6222
Gm44649	7;7;7;7;7	80751822;80751845;80752937;80756639;80758249	80752003;80752003;80753141;80756727;80758612	+;+;+;+;+	840	0.349444	1.39805	1.60722
Gm44669	7	67679335	67681303	-	1969	1.86346	6.65486	6.18898
Gm44787	11;11;11;11	79258586;79259315;79273662;79273777	79259422;79259422;79273893;79273844	-;-;-;-	1069	0.41188	1.27202	1.12998
Gm44851	7	80404269	80406577	+	2309	0.286032	0.776288	1.26171
Gm44963	7;7;7	26304421;26306506;26307226	26304826;26306783;26307286	-;-;-	745	0.098501	5.29562	3.43358
Gm44992	7;7;7;7;7;7;7;7;7;7;7;7;7;7;7;7;7;7;7;7;7;7;7;7;7;7;7;7;7;7;7;7;7;7;7;7;7;7;7;7;7;7;7;7;7;7;7;7;7;7;7;7;7;7;7;7;7;7;7;7;7;7;7;7;7;7;7;7;7;7	39869131;39869519;39871006;39871240;39871240;39872087;39872329;39890684;39903767;39903769;39903770;39903771;39903771;39903772;39903772;39903773;39903774;39903776;39903825;39907784;39910134;39910134;39910134;39910134;39910134;39910134;39910141;39910280;39910585;39910585;39910585;39910585;39910585;39910585;39910585;39910585;39910847;39910847;39914892;39914892;39914892;39921532;39921532;39921532;399…	39869884;39869884;39871353;39871353;39871353;39872427;39872427;39890904;39903919;39903919;39903919;39903919;39903919;39903919;39903919;39903919;39903919;39903919;39903919;39907967;39910251;39910251;39910251;39910251;39910251;39910251;39910251;39910447;39910933;39910970;39910970;39910932;39910970;39910976;39910610;39910970;39910944;39910949;39915353;39915353;39915353;39921658;39921658;39921658;399…	-;-;-;-;-;-;-;-;-;-;-;-;-;-;-;-;-;-;-;-;-;-;-;-;-;-;-;-;-;-;-;-;-;-;-;-;-;-;-;-;-;-;-;-;-;-;-;-;-;-;-;-;-;-;-;-;-;-;-;-;-;-;-;-;-;-;-;-;-;-	4432	0.132461	0.432325	0.440894
Gm4759	7	106417848	106424469	-	6622	0.0997356	0.329017	0.241432
Gm4956	1;1;1;1;1;1;1;1;1;1;1;1;1;1;1;1;1	21285246;21285608;21288142;21288142;21289985;21291295;21291295;21291295;21293480;21293480;21293480;21294926;21294926;21294926;21298041;21298041;21298041	21285733;21285733;21288273;21288273;21290130;21291436;21291365;21291365;21293612;21293612;21293612;21294977;21294977;21294977;21298247;21298127;21298312	-;-;-;-;-;-;-;-;-;-;-;-;-;-;-;-;-	1365	0.161282	3.16967	0.832891
Gm6166	9	57483963	57484371	+	409	1.79421	8.36153	6.91971
Gm6710	2;2;2;2;2;2;2;2;2;2;2;2;2;2;2;2	175869219;175869245;175869286;175873049;175873049;175873049;175873101;175874408;175878229;175878229;175878229;175878557;175878557;175878557;175879775;175879775	175869381;175869381;175869381;175873522;175873103;175873103;175873103;175874509;175878355;175878355;175878355;175878617;175878617;175879656;175881248;175879891	+;+;+;+;+;+;+;+;+;+;+;+;+;+;+;+	3440	0.449259	2.44395	1.34263
Gm6768	12	119260934	119264272	+	3339	3.79839	13.1984	10.7397
Gm7652	5;5;5;5;5	87351480;87352398;87353574;87355173;87364176	87351648;87352458;87353703;87355320;87364818	-;-;-;-;-	1151	1.40263	6.06809	4.75353
Gm8941	1;1	151136507;151137596	151137220;151137780	+;+	899	3.75487	15.1256	13.9504
Gm8995	7;7	106504239;106504392	106507728;106511671	-;-	7433	0.392437	2.05216	1.74538
Gngt2	11;11;11;11;11;11;11;11;11;11;11;11;11;11;11;11;11;11;11;11;11;11;11;11;11	95837216;95842295;95842309;95842668;95842670;95843232;95843609;95843812;95843812;95843812;95843812;95845032;95845032;95845032;95845051;95845051;95845051;95845051;95845483;95845483;95845483;95845483;95845483;95845483;95845483	95837371;95842426;95842426;95842795;95843895;95843392;95843895;95843895;95843895;95843895;95843895;95845140;95845140;95845140;95845140;95845140;95845140;95845140;95845734;95845734;95845734;95845734;95845734;95845734;95845734	+;+;+;+;+;+;+;+;+;+;+;+;+;+;+;+;+;+;+;+;+;+;+;+;+	1877	0.821016	4.31376	2.00638
Got1	19;19;19;19;19;19;19;19;19;19;19;19;19;19;19;19;19;19;19;19;19;19	43499752;43500021;43500315;43502908;43502908;43502908;43504522;43504522;43504522;43504776;43506922;43506922;43507322;43507322;43507870;43507870;43512254;43515681;43515681;43515681;43524338;43524338	43500557;43500557;43500557;43503050;43503050;43503050;43504796;43504687;43504687;43504926;43507026;43507026;43507434;43507434;43507993;43507993;43512643;43515865;43515862;43515862;43524485;43524605	-;-;-;-;-;-;-;-;-;-;-;-;-;-;-;-;-;-;-;-;-;-	2539	16.142	37.9518	40.8453
Gpr35	1;1;1;1;1;1;1;1;1;1;1;1;1	92950865;92956164;92957049;92973122;92973122;92975347;92978922;92982558;92982558;92982558;92982558;92982558;92983144	92950981;92956320;92957137;92973281;92973281;92975448;92979301;92986391;92985044;92985864;92982686;92983009;92986253	+;+;+;+;+;+;+;+;+;+;+;+;+	4839	0.0454949	0.281006	0.264313
Gpr4	7;7	19212538;19221390	19212634;19224174	+;+	2882	0.305551	1.13666	0.838274
Gpr65	12;12	98268635;98274656	98268714;98276624	+;+	2049	0.12535	1.19153	0.624211
Grem2	1;1	174833785;174921573	174837282;174921819	-;-	3745	2.08687	7.95507	8.14915
Gstm2	3;3;3;3;3;3;3;3;3;3;3;3;3;3;3;3;3;3;3;3;3;3	107981702;107981947;107983936;107983936;107984129;107984129;107985049;107985049;107985061;107985247;107985247;107985247;107985482;107985618;107985618;107985618;107986034;107986034;107986230;107986358;107986358;107986358	107982138;107982138;107984046;107984046;107984224;107984224;107985149;107985149;107985149;107985328;107985328;107985328;107986109;107985682;107986109;107985682;107986109;107986109;107986360;107986421;107986421;107986453	-;-;-;-;-;-;-;-;-;-;-;-;-;-;-;-;-;-;-;-;-;-	1679	7.54287	22.0493	25.0749
Gstm3	3;3;3;3;3;3;3;3	107963696;107966087;107966279;107967575;107967766;107968136;107968763;107969105	107964296;107966197;107966374;107967675;107967847;107968200;107968838;107969283	-;-;-;-;-;-;-;-	1311	4.58995	29.6078	16.7521
Gstt3	10;10;10;10;10;10;10;10;10;10;10;10;10;10;10;10;10;10;10;10	75774115;75774800;75774920;75775400;75775490;75775871;75775871;75775871;75776744;75776744;75776744;75776744;75776754;75777200;75778101;75778101;75778101;75780632;75780847;75780847	75775010;75775010;75775010;75776047;75775497;75776047;75776047;75776047;75776894;75776864;75776894;75776894;75776894;75777260;75778188;75778188;75778188;75781050;75781018;75781414	-;-;-;-;-;-;-;-;-;-;-;-;-;-;-;-;-;-;-;-	2627	1.89953	9.22305	4.49895
Gvin1	7;7;7;7;7;7	106156556;106156556;106175027;106175907;106215225;106215225	106165264;106165264;106175166;106175960;106215326;106215310	-;-;-;-;-;-	9005	0.0841809	0.53723	0.528916
H2-K2	17;17;17;17;17;17	33974831;33975497;33975741;33977771;33978254;33978727	33974877;33975613;33976015;33978046;33978523;33978790	-;-;-;-;-;-	1049	41.0407	110.583	104.45
H2-Q1	17;17;17;17;17;17;17;17;17;17;17;17;17;17;17;17;17;17	35320405;35320547;35320558;35320821;35320821;35320821;35321275;35321275;35323064;35323064;35323064;35323467;35323467;35323467;35323780;35324001;35324182;35324182	35320625;35320625;35320625;35321090;35321550;35321090;35321550;35321550;35323339;35323339;35323339;35323601;35323601;35325099;35323812;35324048;35325099;35325099	+;+;+;+;+;+;+;+;+;+;+;+;+;+;+;+;+;+	2860	2.85912	12.4687	7.68896
H2-T22	17;17;17;17;17;17;17;17;17;17;17;17;17;17;17;17;17;17;17;17;17;17;17;17;17;17;17;17;17;17;17;17;17;17;17;17;17;17;17;17;17;17;17	36037128;36038407;36038409;36038409;36038409;36038985;36038985;36038985;36038985;36039177;36039177;36039177;36039177;36039342;36039342;36039342;36039342;36039342;36040225;36040225;36040225;36040478;36040478;36040478;36040478;36040478;36041449;36041449;36041449;36041449;36041449;36041868;36041868;36041868;36041868;36041868;36042342;36042342;36042342;36042342;36042342;36042570;36042570	36039223;36038776;36038776;36038776;36038776;36039054;36039054;36039054;36039054;36039223;36039223;36039223;36039223;36039374;36039374;36039374;36039374;36039374;36040329;36040329;36040329;36040753;36040753;36040753;36040753;36040753;36041685;36041685;36041685;36041685;36041685;36042128;36042128;36042112;36042128;36042128;36042460;36042705;36042683;36042460;36042500;36042747;36042690	-;-;-;-;-;-;-;-;-;-;-;-;-;-;-;-;-;-;-;-;-;-;-;-;-;-;-;-;-;-;-;-;-;-;-;-;-;-;-;-;-;-;-	3414	3.91743	8.743	10.6211
H2-T24	17;17;17;17;17;17;17;17;17	36005695;36006269;36014557;36014800;36015384;36017241;36017241;36020460;36020460	36006789;36006789;36014696;36015075;36015656;36017537;36017537;36020525;36020560	-;-;-;-;-;-;-;-;-	2182	1.58067	5.20727	3.7775
Hck	2;2;2;2;2;2;2;2;2;2;2;2;2;2;2;2;2;2;2;2;2;2;2;2;2;2;2;2;2;2;2;2;2;2;2;2;2;2;2;2;2;2;2;2;2;2;2;2;2;2;2;2	153108468;153108468;153108468;153108693;153124170;153124170;153124170;153124170;153128263;153128263;153128263;153128263;153129043;153129043;153129043;153129043;153129844;153129844;153129844;153129844;153131221;153131221;153131221;153131221;153134069;153134069;153134069;153134069;153134624;153134624;153134624;153134624;153136698;153136698;153136698;153136698;153138262;153138262;153138262;153138262…	153108754;153108754;153108754;153108754;153124287;153124287;153124287;153124287;153128305;153128305;153128305;153128305;153129142;153129142;153129142;153129142;153129942;153129942;153129942;153129942;153131324;153131324;153131324;153131324;153134218;153134218;153134218;153134218;153134776;153134776;153134776;153134776;153136877;153136877;153136877;153136877;153138338;153138338;153138338;153138338…	+;+;+;+;+;+;+;+;+;+;+;+;+;+;+;+;+;+;+;+;+;+;+;+;+;+;+;+;+;+;+;+;+;+;+;+;+;+;+;+;+;+;+;+;+;+;+;+;+;+;+;+	2092	0.420936	1.80226	1.1888
Hcls1	16;16;16;16;16;16;16;16;16;16;16;16;16;16;16;16;16;16;16;16;16;16;16;16;16;16	36934983;36937287;36937287;36937833;36937833;36946594;36946594;36948554;36948554;36951133;36954751;36955260;36955260;36955964;36955964;36955964;36956571;36956571;36956571;36957212;36957212;36961434;36961434;36961991;36962368;36962616	36935074;36937370;36937370;36937906;36937906;36946723;36946723;36948664;36948664;36951187;36955370;36955370;36955370;36956019;36956019;36956019;36956633;36956640;36956640;36957423;36957423;36961530;36961550;36962234;36962430;36963212	+;+;+;+;+;+;+;+;+;+;+;+;+;+;+;+;+;+;+;+;+;+;+;+;+;+	2525	0.87188	3.35357	1.77288
Hcn3	3;3;3;3;3;3;3;3;3;3;3;3;3;3;3;3;3;3;3	89146074;89148717;89148732;89148849;89149816;89149816;89150355;89150355;89150355;89150862;89150862;89150862;89151425;89151481;89152631;89152631;89152879;89159785;89159785	89148299;89148881;89148881;89148881;89150056;89150056;89150501;89150501;89150501;89151232;89151214;89151080;89151586;89151586;89152773;89153060;89153060;89159980;89160196	-;-;-;-;-;-;-;-;-;-;-;-;-;-;-;-;-;-;-	4154	4.77857	19.6183	19.1268
Hist2h4	3	96261682	96263311	-	1630	0.360163	1.40302	1.52574
Hk3	13;13;13;13;13;13;13;13;13;13;13;13;13;13;13;13;13;13;13;13;13;13;13;13;13;13;13;13;13;13;13;13;13;13;13;13;13;13;13;13;13;13;13;13;13;13;13;13;13;13;13;13;13;13;13;13;13;13;13;13;13;13;13;13;13;13;13;13;13;13;13;13;13;13;13;13;13;13;13;13;13;13;13;13;13;13;13;13;13;13;13;13;13;13;13;13;13;13;13;13;13;13;13;13;13	55005985;55005988;55005992;55006067;55006068;55006403;55006403;55006403;55006403;55006403;55006806;55006806;55006806;55006806;55006806;55007072;55007072;55007072;55007072;55007072;55008675;55008675;55008675;55008675;55008675;55008953;55008953;55008953;55008953;55008953;55010697;55010697;55010697;55010697;55010697;55010896;55010896;55010896;55010896;55010896;55011148;55011148;55011148;55011148;550…	55006315;55006315;55006315;55006315;55006315;55006636;55006636;55006636;55006636;55006636;55006961;55006961;55006961;55006961;55006961;55007255;55007255;55007255;55007255;55007255;55008774;55008774;55008774;55008774;55008774;55009048;55009048;55009048;55009048;55009048;55010816;55010816;55010816;55010816;55010816;55011035;55011035;55011035;55011035;55011035;55011308;55011443;55011443;55011443;550…	-;-;-;-;-;-;-;-;-;-;-;-;-;-;-;-;-;-;-;-;-;-;-;-;-;-;-;-;-;-;-;-;-;-;-;-;-;-;-;-;-;-;-;-;-;-;-;-;-;-;-;-;-;-;-;-;-;-;-;-;-;-;-;-;-;-;-;-;-;-;-;-;-;-;-;-;-;-;-;-;-;-;-;-;-;-;-;-;-;-;-;-;-;-;-;-;-;-;-;-;-;-;-;-;-	3682	0.239163	0.755401	0.617543
Hmgcr	13;13;13;13;13;13;13;13;13;13;13;13;13;13;13;13;13;13;13;13;13;13;13;13;13;13;13;13;13;13;13;13;13;13;13;13;13;13;13;13;13;13;13;13;13;13;13;13;13;13;13;13;13;13;13;13;13;13;13;13;13;13;13;13;13;13;13;13;13;13;13;13;13;13;13;13;13;13	96648967;96650276;96650443;96651010;96651010;96651010;96651354;96651856;96651856;96652096;96652096;96652096;96652096;96652121;96652658;96652658;96652658;96652658;96652658;96654816;96654816;96654816;96655550;96655550;96655550;96655854;96655854;96656563;96656563;96656563;96658583;96658583;96658871;96658871;96658883;96659217;96659217;96659217;96659894;96659894;96659894;96660118;96660118;96660118;966…	96650633;96650633;96650633;96651164;96651164;96651164;96652014;96652014;96652014;96652236;96652236;96652236;96652236;96652236;96652828;96652828;96652803;96652828;96652828;96654921;96654921;96654921;96655707;96655707;96655707;96656012;96656012;96656667;96656757;96656757;96658758;96658758;96659118;96659118;96659118;96659377;96659377;96659377;96660010;96660010;96660010;96660224;96660224;96660224;966…	-;-;-;-;-;-;-;-;-;-;-;-;-;-;-;-;-;-;-;-;-;-;-;-;-;-;-;-;-;-;-;-;-;-;-;-;-;-;-;-;-;-;-;-;-;-;-;-;-;-;-;-;-;-;-;-;-;-;-;-;-;-;-;-;-;-;-;-;-;-;-;-;-;-;-;-;-;-	7275	3.97429	13.9193	9.41553
Hsd17b6	10;10;10;10;10	127990941;127993596;127994329;127997698;128000562	127991465;127993759;127994587;127998024;128000678	-;-;-;-;-	1392	175.524	715.683	482.735
Hspa1a	17	34969190	34972156	-	2967	2.88759	26.3489	13.1041
Hspa1b	17	34956436	34959238	-	2803	7.10584	58.0421	34.4357
Idi1	13;13;13;13;13;13;13;13;13;13;13;13;13;13;13;13;13;13;13;13;13;13;13;13	8885501;8885943;8885993;8885994;8886732;8886732;8886732;8886732;8887069;8887485;8887485;8887485;8887485;8887923;8887923;8887923;8887923;8887923;8890318;8890318;8890318;8890318;8890318;8891237	8885996;8885996;8885996;8885996;8886904;8886904;8886904;8886904;8887577;8887577;8887577;8887577;8887577;8888115;8888053;8888098;8888053;8888053;8890600;8890445;8890375;8890558;8892451;8891358	+;+;+;+;+;+;+;+;+;+;+;+;+;+;+;+;+;+;+;+;+;+;+;+	3505	2.97992	6.62471	8.39292
Ifi202b	1;1;1;1;1;1;1	173962568;173963794;173971353;173972191;173974733;173977265;173982674	173962823;173963982;173971757;173972379;173975146;173977437;173982744	-;-;-;-;-;-;-	1697	0.951344	12.1286	3.05662
Ifi207	1;1;1;1;1;1;1;1;1;1;1;1;1;1;1;1	173723430;173723683;173724934;173724934;173727409;173727409;173728882;173728882;173732275;173732275;173735096;173735117;173736187;173736187;173741588;173741588	173723752;173723752;173725122;173725122;173727825;173727825;173730540;173730540;173732442;173732442;173735313;173735313;173736471;173736471;173741747;173741809	-;-;-;-;-;-;-;-;-;-;-;-;-;-;-;-	3481	1.15588	7.74214	4.14885
Ifi211	1;1;1;1;1;1;1	173896345;173899344;173901620;173905473;173906132;173907597;173912814	173896643;173899532;173902042;173905631;173906328;173907881;173913046	-;-;-;-;-;-;-	1785	0.212544	1.16865	0.669957
Ifi27l2b	12;12;12;12;12;12;12	103450898;103451806;103452471;103455722;103456358;103457015;103457153	103451352;103451967;103452500;103455904;103456519;103457044;103457223	-;-;-;-;-;-;-	1093	0.738532	11.5123	5.7859
Ifi30	8;8;8;8;8;8;8;8	70762774;70763128;70763727;70764547;70764719;70764765;70764920;70766509	70763040;70763181;70763879;70764639;70764763;70764794;70765102;70766663	-;-;-;-;-;-;-;-	980	3.36964	12.3617	6.88808
Ifi44	3;3;3;3;3;3;3;3;3;3;3;3;3;3;3;3;3;3;3	151730922;151732426;151738223;151739320;151739320;151745491;151745491;151745693;151745793;151745794;151747618;151747618;151747618;151749145;151749145;151749836;151749836;151749836;151749836	151732553;151732553;151738323;151739491;151739491;151745637;151745637;151749644;151745988;151745988;151747654;151747654;151747654;151749249;151749644;151749947;151749903;151749882;151749960	-;-;-;-;-;-;-;-;-;-;-;-;-;-;-;-;-;-;-	6129	0.179597	2.99513	0.51011
Ifit1	19;19	34640871;34647471	34640987;34650009	+;+	2656	0.414438	2.03624	0.949732
Ifit3b	19;19	34607970;34611431	34607998;34613401	+;+	2000	0.421954	2.35892	1.03031
Igsf6	7;7;7;7;7;7	121064067;121067199;121067581;121068261;121070491;121074439	121065517;121067276;121067628;121068364;121070850;121074572	-;-;-;-;-;-	2175	1.51827	5.54146	3.07093
Il13ra1	X;X;X;X;X;X;X;X;X;X;X	36112110;36126645;36130604;36132964;36141213;36144011;36148650;36148979;36152018;36155543;36168814	36112275;36126784;36130742;36133084;36141397;36144162;36148697;36149111;36152114;36155627;36171259	+;+;+;+;+;+;+;+;+;+;+	3712	1.93738	6.42729	5.24498
Ildr2	1;1;1;1;1;1;1;1;1;1;1;1;1;1;1;1;1;1;1;1;1;1;1;1;1;1;1;1;1;1;1;1;1;1;1;1;1;1;1;1;1;1;1;1;1;1;1;1;1;1;1;1;1;1;1;1	166254139;166254193;166254193;166254193;166254193;166254193;166254193;166269305;166269305;166269305;166269305;166269305;166269305;166269305;166270499;166270499;166270499;166270499;166270499;166270499;166270499;166291416;166291416;166291416;166291416;166294591;166294591;166294591;166294591;166295752;166295752;166295752;166303502;166303502;166303502;166303502;166303502;166303502;166307720;166307720…	166254466;166254466;166254466;166254466;166254466;166254466;166254466;166269637;166269637;166269637;166269637;166269637;166269637;166269637;166270618;166270618;166270618;166270618;166270618;166270618;166270618;166291472;166291472;166291472;166291472;166294737;166294737;166294737;166294737;166295928;166295928;166295928;166303615;166303615;166303615;166303615;166303615;166303615;166307933;166307933…	+;+;+;+;+;+;+;+;+;+;+;+;+;+;+;+;+;+;+;+;+;+;+;+;+;+;+;+;+;+;+;+;+;+;+;+;+;+;+;+;+;+;+;+;+;+;+;+;+;+;+;+;+;+;+;+	8251	1.77877	4.39724	3.96574
Inpp5d	1;1;1;1;1;1;1;1;1;1;1;1;1;1;1;1;1;1;1;1;1;1;1;1;1;1;1;1;1;1;1;1;1;1;1;1;1;1;1;1;1;1;1;1;1;1;1;1;1;1;1;1;1;1;1;1;1;1;1;1;1;1;1;1;1;1;1;1;1;1;1;1;1;1;1;1;1;1;1;1;1;1;1;1;1;1;1;1;1;1;1;1;1;1;1;1;1;1;1;1;1;1;1;1;1;1;1;1;1;1;1;1;1;1;1;1;1;1;1;1;1;1;1;1;1;1;1;1;1;1;1;1;1;1;1;1;1;1;1;1;1;1;1;1;1;1;1;1;1;1;1;1;1;1;1;1;1;1;1;1;1;1;1;1;1;1;1;1;1;1;1	87620312;87620356;87620362;87620389;87620398;87620399;87620627;87621674;87635292;87635292;87635292;87635292;87635292;87635292;87635292;87635292;87642982;87665387;87665387;87665387;87665387;87665387;87665387;87667889;87667889;87667889;87667889;87667892;87667892;87669642;87669642;87669642;87669642;87676239;87676239;87676283;87676283;87676283;87676283;87681489;87681489;87681489;87681489;87681489;876…	87620631;87620631;87620631;87620631;87620631;87620631;87620677;87621774;87635355;87635355;87635355;87635355;87635355;87635379;87635355;87635355;87645154;87665537;87665537;87665537;87665537;87665537;87665537;87667916;87667992;87668063;87668063;87668063;87668063;87669782;87669782;87669782;87669782;87676370;87676370;87676370;87676370;87676370;87676370;87681569;87681569;87681569;87681569;87681569;876…	+;+;+;+;+;+;+;+;+;+;+;+;+;+;+;+;+;+;+;+;+;+;+;+;+;+;+;+;+;+;+;+;+;+;+;+;+;+;+;+;+;+;+;+;+;+;+;+;+;+;+;+;+;+;+;+;+;+;+;+;+;+;+;+;+;+;+;+;+;+;+;+;+;+;+;+;+;+;+;+;+;+;+;+;+;+;+;+;+;+;+;+;+;+;+;+;+;+;+;+;+;+;+;+;+;+;+;+;+;+;+;+;+;+;+;+;+;+;+;+;+;+;+;+;+;+;+;+;+;+;+;+;+;+;+;+;+;+;+;+;+;+;+;+;+;+;+;+;+;+;+;+;+;+;+;+;+;+;+;+;+;+;+;+;+;+;+;+;+;+;+	7602	0.125491	0.455312	0.289758
Iqgap1	7;7;7;7;7;7;7;7;7;7;7;7;7;7;7;7;7;7;7;7;7;7;7;7;7;7;7;7;7;7;7;7;7;7;7;7;7;7;7;7;7;7;7;7;7;7;7;7;7;7;7;7;7;7;7;7;7;7;7;7;7;7;7;7;7;7;7;7;7;7;7;7;7;7;7;7;7;7;7;7;7;7;7;7	80711583;80717011;80720869;80722962;80723779;80725587;80725966;80726739;80726779;80727953;80727953;80728849;80728849;80729644;80730069;80730069;80730242;80730242;80733986;80735474;80736262;80738114;80738673;80738833;80738995;80739790;80741078;80743036;80743793;80744118;80748824;80749377;80751326;80751869;80751869;80752190;80752190;80755121;80756180;80756180;80757404;80757404;80757404;80758174;807…	80713945;80717119;80720991;80723128;80723991;80725674;80726101;80726841;80726841;80728085;80728085;80729081;80729081;80729691;80730153;80730153;80730248;80730382;80734210;80735637;80736417;80738322;80738742;80738904;80739078;80739960;80743880;80743178;80743960;80744208;80748987;80751450;80751450;80752029;80752029;80752353;80752353;80756264;80756264;80756264;80757567;80757567;80757567;80758258;807…	-;-;-;-;-;-;-;-;-;-;-;-;-;-;-;-;-;-;-;-;-;-;-;-;-;-;-;-;-;-;-;-;-;-;-;-;-;-;-;-;-;-;-;-;-;-;-;-;-;-;-;-;-;-;-;-;-;-;-;-;-;-;-;-;-;-;-;-;-;-;-;-;-;-;-;-;-;-;-;-;-;-;-;-	16538	0.465911	1.2651	1.13858
Irf8	8;8;8;8;8;8;8;8;8;8;8;8;8;8;8;8;8;8;8;8;8;8;8;8;8;8;8;8;8;8;8;8;8;8;8;8	120736358;120736359;120736385;120738639;120739817;120739817;120739817;120739817;120739990;120743706;120743706;120743706;120745480;120745620;120745620;120745620;120747203;120747203;120747203;120747203;120748299;120748299;120748299;120748299;120752209;120753353;120753353;120753353;120753353;120753353;120754388;120754388;120754388;120754999;120754999;120754999	120736409;120736409;120736409;120739226;120739991;120743234;120739991;120739991;120739991;120743889;120743889;120743889;120745708;120745708;120745708;120745708;120747308;120747308;120747308;120747308;120748346;120748346;120748346;120748346;120752445;120753733;120753711;120753478;120753733;120753733;120754503;120754503;120754503;120755204;120755581;120756694	+;+;+;+;+;+;+;+;+;+;+;+;+;+;+;+;+;+;+;+;+;+;+;+;+;+;+;+;+;+;+;+;+;+;+;+	7055	0.364056	0.858574	0.775523
Itgb2	10;10;10;10;10;10;10;10;10;10;10;10;10;10;10;10;10;10;10;10;10;10;10;10;10;10;10;10;10;10;10;10;10;10;10;10;10;10;10;10;10;10;10;10;10;10;10;10;10;10;10;10;10	77530252;77530347;77530370;77530374;77530380;77541966;77541966;77541966;77541966;77542398;77542398;77542398;77546013;77546013;77546013;77546013;77546013;77547126;77547126;77547126;77547126;77547126;77548546;77548546;77548546;77548546;77549946;77549946;77549946;77550973;77550973;77550973;77556088;77556088;77556088;77557390;77557390;77557390;77557952;77557952;77559479;77560150;77560150;77560150;775…	77530459;77530459;77530459;77530459;77530459;77542026;77542026;77542026;77542026;77542486;77542546;77542486;77546193;77546193;77546193;77546193;77546193;77547296;77547296;77547296;77547195;77547296;77548787;77548787;77548672;77548787;77550101;77550101;77550101;77551068;77551068;77551068;77556177;77556177;77556177;77557530;77557530;77557530;77558139;77558139;77559723;77560372;77560372;77560372;775…	+;+;+;+;+;+;+;+;+;+;+;+;+;+;+;+;+;+;+;+;+;+;+;+;+;+;+;+;+;+;+;+;+;+;+;+;+;+;+;+;+;+;+;+;+;+;+;+;+;+;+;+;+	3052	0.673241	3.85797	2.32818
Jdp2	12;12;12;12;12;12;12;12;12;12;12;12	85599105;85599416;85600018;85608133;85608133;85608133;85631645;85631645;85631645;85638773;85638773;85638773	85599227;85599614;85600132;85608365;85608365;85608365;85631749;85631749;85631749;85639878;85639877;85639878	+;+;+;+;+;+;+;+;+;+;+;+	1881	0.429142	1.24866	1.17105
Kbtbd8	6;6;6;6;6;6;6;6;6;6;6;6;6	95117240;95117740;95117880;95117984;95118523;95118523;95118523;95121739;95121739;95121739;95121739;95126477;95126477	95117348;95117974;95117974;95118098;95118733;95118733;95118733;95122847;95122847;95121797;95121890;95129790;95129790	+;+;+;+;+;+;+;+;+;+;+;+;+	5093	0.273764	1.28641	0.627827
Kcnd1	X;X;X;X;X;X;X;X	7822289;7822307;7822601;7831172;7831432;7831602;7832093;7836266	7824963;7822390;7823267;7831334;7831515;7831700;7832343;7838280	+;+;+;+;+;+;+;+	5287	0.0832796	0.257195	0.53759
Kcnj10	1;1	172341210;172368921	172341451;172374085	+;+	5407	0.0542876	0.61157	0.229976
Kcnj16	11;11;11;11;11;11;11;11;11;11;11;11;11;11	110968033;110968033;110968064;110986430;110986430;110997487;111023860;111023860;111024409;111024409;111024409;111024409;111024409;111024409	110968095;110968095;110968095;110986510;110986510;110997597;111023980;111023980;111024711;111027965;111024822;111027968;111027968;111027965	+;+;+;+;+;+;+;+;+;+;+;+;+;+	3936	0.298306	2.33981	0.695035
Kctd12	14;14;14	102976581;102977537;102981479	102982637;102978002;102981551	-;-;-	6057	1.83549	3.8777	3.67774
Keg1	19;19;19;19;19;19;19;19;19;19;19;19;19;19;19;19;19;19;19;19;19;19;19;19;19;19;19;19;19;19;19;19;19;19;19	12695786;12695787;12695793;12695793;12695804;12695814;12695814;12709597;12709597;12709597;12709597;12709597;12709597;12709597;12710982;12710982;12710982;12711012;12711012;12711012;12714507;12714507;12714507;12714507;12714507;12714507;12714507;12715898;12715898;12715898;12715898;12715898;12718780;12718780;12718909	12695841;12695841;12695841;12695841;12695841;12695841;12695841;12709686;12709686;12709686;12711089;12709750;12709686;12709686;12711089;12711089;12711089;12711089;12711089;12711089;12714753;12714831;12714633;12714633;12714633;12714633;12714633;12716069;12718564;12716069;12716047;12716069;12719007;12719902;12719117	+;+;+;+;+;+;+;+;+;+;+;+;+;+;+;+;+;+;+;+;+;+;+;+;+;+;+;+;+;+;+;+;+;+;+	5664	10.2126	26.321	24.689
Kif11	19;19;19;19;19;19;19;19;19;19;19;19;19;19;19;19;19;19;19;19;19;19	37376403;37384240;37384542;37384732;37387017;37387311;37390312;37390649;37393685;37398119;37402205;37403461;37404114;37406994;37409476;37409726;37410527;37411331;37413121;37416490;37417901;37420259	37376667;37384372;37384639;37384810;37387202;37387435;37390402;37390891;37393780;37398207;37402292;37403649;37404321;37407166;37409601;37409884;37410633;37411610;37413343;37416632;37418017;37421859	+;+;+;+;+;+;+;+;+;+;+;+;+;+;+;+;+;+;+;+;+;+	4819	0.197963	0.44891	0.471839
Klhl28	12;12;12;12;12	64942440;64950014;64951376;64956839;64965409	64943613;64950222;64951819;64957737;64965536	-;-;-;-;-	2854	1.22134	2.67462	2.62663
Klrk1	6;6;6;6;6;6;6;6;6;6;6;6;6;6;6;6;6;6;6;6;6;6;6;6;6;6;6;6;6;6;6;6	129610323;129612414;129612460;129614603;129614603;129614603;129615309;129615309;129615309;129616297;129616297;129616297;129616493;129616568;129616669;129616669;129616669;129617483;129617483;129617483;129617483;129620602;129621135;129621135;129621135;129621135;129621135;129622537;129622537;129622537;129623811;129623811	129612903;129612903;129612903;129614706;129614706;129614706;129615460;129615460;129615460;129616332;129616350;129616332;129617521;129616773;129616773;129616773;129616773;129617521;129617521;129617521;129617521;129623860;129621242;129621242;129621242;129621242;129621242;129622684;129622581;129622772;129623841;129623864	-;-;-;-;-;-;-;-;-;-;-;-;-;-;-;-;-;-;-;-;-;-;-;-;-;-;-;-;-;-;-;-	7183	0.102162	0.546407	0.321498
Lcn2	2;2;2;2;2;2;2;2;2;2;2;2;2;2;2;2;2;2;2;2;2;2;2;2	32384633;32384633;32384639;32385183;32385419;32385419;32385445;32385706;32385706;32385706;32385706;32385956;32385956;32385956;32386556;32387028;32387028;32387028;32387580;32387580;32387580;32387580;32387851;32388175	32385520;32384884;32384884;32385520;32385999;32385520;32385520;32386107;32385825;32385825;32385825;32386041;32386041;32386041;32387164;32387164;32387164;32387164;32387747;32387759;32387797;32387722;32388093;32388252	-;-;-;-;-;-;-;-;-;-;-;-;-;-;-;-;-;-;-;-;-;-;-;-	2623	0.587513	15.9175	3.76545
Lcp2	11;11;11;11;11;11;11;11;11;11;11;11;11;11;11;11;11;11;11;11;11;11;11;11;11;11;11;11;11;11;11;11;11;11;11;11;11;11;11;11;11;11;11;11;11;11;11;11	34046920;34047168;34050897;34050897;34054306;34054306;34068414;34068414;34068938;34068938;34069868;34069868;34070970;34070970;34073497;34073497;34075052;34075052;34075216;34075216;34078177;34078244;34078244;34078385;34078385;34078385;34078508;34078508;34078508;34080190;34080190;34081720;34081720;34082394;34082394;34083420;34083420;34087004;34087208;34087208;34088030;34088030;34088030;34089525;340…	34047431;34047431;34050959;34050959;34054352;34054352;34068479;34068479;34068969;34068969;34069905;34069905;34071168;34071168;34073594;34073594;34075118;34075118;34075299;34075299;34078269;34078269;34078269;34078404;34078404;34078404;34078592;34078615;34078615;34080220;34080220;34081732;34081732;34082523;34082523;34083469;34083469;34087302;34087302;34087302;34088107;34088107;34088107;34089680;340…	+;+;+;+;+;+;+;+;+;+;+;+;+;+;+;+;+;+;+;+;+;+;+;+;+;+;+;+;+;+;+;+;+;+;+;+;+;+;+;+;+;+;+;+;+;+;+;+	4459	0.460805	1.67031	1.05174
Lepr	4;4;4;4;4;4;4;4;4;4;4;4;4;4;4;4;4;4;4;4;4;4;4;4;4;4;4;4;4;4;4;4;4;4;4;4;4;4;4;4;4;4;4;4;4;4;4;4;4;4;4;4;4;4;4;4;4;4;4;4;4;4;4;4;4;4;4;4;4;4;4;4;4	101717404;101717404;101717404;101717407;101728010;101728010;101728010;101728010;101733267;101733267;101733267;101733267;101735560;101735560;101735560;101745511;101745511;101745511;101750287;101750287;101750287;101752061;101752061;101752061;101764861;101764861;101764861;101765304;101765304;101765304;101768047;101768047;101768047;101768047;101771297;101771297;101771297;101771297;101771368;101772836…	101717938;101717938;101717938;101717503;101728069;101728069;101728069;101728069;101733317;101733596;101733596;101733596;101735683;101735683;101735683;101745716;101745716;101745716;101750429;101750429;101750429;101752205;101752205;101752205;101765151;101765151;101765151;101765421;101765421;101765421;101768246;101768246;101768246;101768246;101771445;101771445;101771445;101771445;101771445;101772995…	+;+;+;+;+;+;+;+;+;+;+;+;+;+;+;+;+;+;+;+;+;+;+;+;+;+;+;+;+;+;+;+;+;+;+;+;+;+;+;+;+;+;+;+;+;+;+;+;+;+;+;+;+;+;+;+;+;+;+;+;+;+;+;+;+;+;+;+;+;+;+;+;+	7049	0.754757	2.76205	4.31437
Lgals1	15;15;15;15	78926725;78927970;78929633;78929998	78926804;78928049;78929804;78930465	+;+;+;+	800	0.458645	3.32221	1.68758
Lgals3	14;14;14;14;14;14;14;14;14;14;14;14;14;14;14;14;14;14;14;14;14;14;14;14;14	47367751;47368246;47373813;47373899;47373916;47373974;47379479;47379523;47379523;47379523;47379523;47380053;47380053;47380053;47380053;47380053;47381596;47381596;47381596;47384602;47384602;47384602;47385525;47385525;47385525	47367852;47368368;47373952;47373979;47373952;47374122;47379544;47379544;47379544;47379544;47379544;47380317;47380418;47380418;47380418;47380418;47381684;47381684;47381684;47384767;47384767;47384767;47385794;47385799;47386160	+;+;+;+;+;+;+;+;+;+;+;+;+;+;+;+;+;+;+;+;+;+;+;+;+	1858	0.355462	1.59678	0.994325
Lilra5	7;7;7;7;7;7	4237754;4237943;4238136;4238559;4241893;4242071	4237791;4237978;4238420;4238864;4241943;4243463	+;+;+;+;+;+	2109	0.974267	4.93824	3.7061
Lilrb4a	10;10;10;10;10;10;10;10;10;10;10;10;10;10;10;10;10;10	51480679;51480906;51481140;51481567;51482869;51483762;51484517;51485713;51485888;51491018;51491197;51491434;51491861;51493170;51494062;51494793;51495994;51496167	51480753;51480941;51481424;51481869;51482904;51483878;51484569;51485780;51486219;51491051;51491232;51491718;51492163;51493205;51494178;51494845;51496059;51496613	+;+;+;+;+;+;+;+;+;+;+;+;+;+;+;+;+;+	2682	0.560908	4.76078	1.81932
Limd2	11;11;11;11;11;11;11;11;11;11;11;11;11;11;11;11;11;11	106156256;106158314;106158431;106158651;106158935;106158935;106158935;106158935;106159162;106159162;106159162;106159162;106159348;106159348;106159348;106159813;106160051;106160360	106158833;106158833;106158833;106158833;106159074;106159074;106159074;106159074;106159206;106159206;106159206;106159409;106159414;106159442;106159442;106159927;106160142;106160860	-;-;-;-;-;-;-;-;-;-;-;-;-;-;-;-;-;-	3707	0.692855	1.50061	1.42802
Lingo4	3;3	94398517;94401822	94399481;94404501	+;+	3645	0.332187	1.11917	1.00395
Lmod3	6;6;6	97238534;97247170;97252278	97238871;97248564;97252759	-;-;-	2215	0.0662602	0.809232	0.834066
Loxl2	14;14;14;14;14;14;14;14;14;14;14;14;14;14;14;14;14;14;14;14;14;14;14;14;14;14;14;14	69609068;69609478;69633884;69633884;69644696;69644696;69660639;69660639;69663900;69663900;69667267;69667267;69673382;69673382;69675676;69675676;69677813;69677813;69682095;69682095;69689028;69689028;69690134;69690134;69692314;69692314;69693040;69693040	69609294;69609566;69634290;69634290;69644871;69644871;69660850;69660850;69664122;69664122;69667450;69667450;69673533;69673533;69675843;69675843;69677975;69677975;69682338;69682338;69689143;69689143;69690270;69690270;69692425;69692425;69693698;69695834	+;+;+;+;+;+;+;+;+;+;+;+;+;+;+;+;+;+;+;+;+;+;+;+;+;+;+;+	5405	0.26475	0.646102	0.587247
Lpin1	12;12;12;12;12;12;12;12;12;12;12;12;12;12;12;12;12;12;12;12;12;12;12;12;12;12;12;12;12;12;12;12;12;12;12;12;12;12;12;12;12;12	16535669;16535669;16540914;16540914;16541714;16541714;16544644;16544644;16546721;16546721;16547486;16547486;16548877;16548877;16553949;16553949;16558409;16558409;16560982;16560982;16562363;16562363;16563622;16563622;16564526;16564526;16565391;16565391;16568390;16568390;16571164;16573660;16573660;16576948;16576948;16579882;16579882;16580704;16580704;16584508;16589718;16589718	16538572;16538572;16541017;16541017;16541828;16541828;16544796;16544796;16546807;16546807;16547634;16547634;16549003;16549003;16554028;16554028;16558501;16558501;16561051;16561051;16562456;16562456;16563812;16563812;16564619;16564619;16565697;16565697;16568519;16568519;16571262;16573785;16573785;16577255;16577255;16579977;16579977;16580904;16580904;16584651;16589770;16589770	-;-;-;-;-;-;-;-;-;-;-;-;-;-;-;-;-;-;-;-;-;-;-;-;-;-;-;-;-;-;-;-;-;-;-;-;-;-;-;-;-;-	5725	32.28	152.823	125.7
Lrp2bp	8;8;8;8;8;8;8;8;8;8;8;8;8;8;8;8;8;8;8;8;8;8;8;8;8;8;8;8;8;8;8;8;8;8;8;8;8;8;8;8;8;8;8;8;8	45999303;45999308;46010602;46010611;46011114;46011114;46011114;46011114;46011750;46011946;46011946;46011946;46011946;46013069;46013069;46013069;46013069;46013069;46020420;46020420;46020420;46020420;46020427;46020642;46020642;46020642;46020642;46020642;46022012;46022480;46022863;46022863;46022863;46022863;46022863;46025116;46025116;46025116;46025116;46025116;46027252;46027252;46027252;46027252;460…	45999505;45999701;46010800;46010800;46011234;46011234;46011234;46011234;46012058;46012058;46012058;46012058;46012058;46013182;46013182;46013182;46013182;46013182;46020562;46020562;46020562;46020562;46020562;46020732;46020747;46020747;46020747;46020747;46022232;46022580;46023086;46023086;46023086;46023086;46023086;46025290;46025290;46025290;46025290;46025290;46029448;46027643;46029477;46027386;460…	+;+;+;+;+;+;+;+;+;+;+;+;+;+;+;+;+;+;+;+;+;+;+;+;+;+;+;+;+;+;+;+;+;+;+;+;+;+;+;+;+;+;+;+;+	4338	0.304495	1.63854	1.44143
Lrrc8b	5;5;5;5;5	105415775;105468797;105476186;105479767;105485803	105415912;105468851;105476284;105481928;105490074	+;+;+;+;+	6726	0.114559	0.266495	0.359189
Lrtm1	14;14;14	29018208;29021620;29027324	29018609;29022216;29033642	+;+;+	7318	0.0200555	1.85814	0.880093
Ly6a	15;15;15;15;15;15;15;15;15;15;15;15;15;15;15;15;15;15;15;15;15	74994877;74994878;74994878;74994899;74994951;74996452;74996452;74996452;74996452;74996452;74996534;74997535;74997535;74997535;74997535;74997535;74997535;74997848;74997848;74997879;74997879	74995479;74995479;74995479;74995479;74995479;74996568;74996568;74996568;74996568;74996568;74996568;74997632;74997617;74997835;74997617;74997632;74997634;74997928;74997907;74997987;74998031	-;-;-;-;-;-;-;-;-;-;-;-;-;-;-;-;-;-;-;-;-	1205	0.487191	2.94937	1.40048
Ly6d	15;15;15	74762056;74762751;74763509	74762588;74762849;74763620	-;-;-	744	0.986334	2.74151	3.34269
Ly6e	15;15;15;15;15;15;15;15;15;15;15;15;15;15;15;15;15;15;15;15;15;15;15;15;15;15;15;15;15;15;15;15;15;15;15;15;15;15;15;15;15;15;15;15;15;15;15;15;15;15;15;15;15;15;15;15;15;15;15;15;15;15;15;15;15	74955051;74955051;74955071;74955106;74955142;74955164;74955178;74955186;74955241;74955260;74955483;74955483;74955567;74955567;74955608;74955653;74955666;74955668;74955672;74955683;74956555;74957415;74957415;74957777;74957777;74957777;74957777;74957777;74957777;74957777;74957777;74957777;74957780;74957780;74957780;74957780;74957780;74957780;74958269;74958269;74958269;74958269;74958269;74958269;749…	74955335;74955335;74955717;74955335;74955717;74955335;74955717;74955335;74955335;74955335;74955717;74955717;74955717;74955717;74955717;74955717;74955717;74955717;74955717;74956497;74956713;74957463;74957463;74957877;74958388;74957877;74957877;74957877;74957877;74957877;74957877;74957877;74957877;74957877;74957877;74957877;74957877;74957877;74959331;74958388;74958388;74958388;74958388;74958388;749…	+;+;+;+;+;+;+;+;+;+;+;+;+;+;+;+;+;+;+;+;+;+;+;+;+;+;+;+;+;+;+;+;+;+;+;+;+;+;+;+;+;+;+;+;+;+;+;+;+;+;+;+;+;+;+;+;+;+;+;+;+;+;+;+;+	3784	21.2548	77.0974	46.9169
Ly75	2;2;2;2;2;2;2;2;2;2;2;2;2;2;2;2;2;2;2;2;2;2;2;2;2;2;2;2;2;2;2;2;2;2;2;2;2;2;2;2;2;2;2;2;2;2;2;2;2;2;2;2;2;2;2;2;2;2;2;2;2;2;2;2;2;2;2;2;2;2	60292103;60293760;60299047;60299047;60300955;60300955;60303578;60303578;60306330;60306330;60308139;60308139;60311609;60311609;60314157;60314157;60316089;60316089;60318308;60318308;60321698;60321698;60323819;60323819;60327787;60327787;60328390;60328390;60329976;60329976;60330726;60330726;60331077;60331077;60332319;60332319;60332925;60332925;60334446;60334450;60338295;60338295;60340153;60340153;603…	60293938;60293938;60299214;60299214;60301077;60301077;60303727;60303727;60306498;60306498;60308365;60308365;60311803;60311803;60314273;60314273;60316256;60316256;60318473;60318473;60321924;60321924;60323948;60323948;60327947;60327947;60328495;60328495;60330115;60330115;60330808;60330808;60331144;60331144;60332494;60332494;60332960;60332956;60334564;60334564;60338363;60338363;60340234;60340234;603…	-;-;-;-;-;-;-;-;-;-;-;-;-;-;-;-;-;-;-;-;-;-;-;-;-;-;-;-;-;-;-;-;-;-;-;-;-;-;-;-;-;-;-;-;-;-;-;-;-;-;-;-;-;-;-;-;-;-;-;-;-;-;-;-;-;-;-;-;-;-	6905	0.308199	0.751907	0.761498
Lyz2	10;10;10;10	117277334;117278643;117280641;117282107	117278187;117278721;117280805;117282274	-;-;-;-	1266	5.33275	17.6247	13.4984
Maff	15;15;15;15;15;15	79347541;79348061;79356967;79356967;79357421;79357421	79347754;79348246;79357033;79357033;79359072;79359072	+;+;+;+;+;+	2119	5.5756	13.6218	12.491
43160	#N/A	#N/A	#N/A	#N/A	#N/A	0.174575	0.804394	0.387795
Marco	1;1;1;1;1;1;1;1;1;1;1;1;1;1;1;1;1;1;1;1;1;1	120474538;120476554;120477366;120477852;120479344;120484625;120484774;120485689;120485832;120488147;120488532;120490913;120490913;120492032;120492032;120493620;120493620;120494044;120494741;120494741;120504669;120504669	120474789;120476730;120477410;120477950;120479388;120484687;120484872;120485724;120485930;120488254;120488576;120490957;120490957;120492130;120492130;120493655;120493655;120494262;120494842;120494842;120505024;120504756	-;-;-;-;-;-;-;-;-;-;-;-;-;-;-;-;-;-;-;-;-;-	1925	3.31654	52.6416	7.12406
Mb21d1	9;9;9;9;9;9;9;9;9;9;9;9;9;9;9	78430526;78431337;78431789;78434313;78434313;78434313;78435441;78435441;78435441;78437303;78437303;78437303;78442464;78442464;78442464	78433267;78433227;78433267;78434415;78434415;78434415;78435683;78435727;78435683;78437522;78437522;78437522;78442885;78443237;78443204	-;-;-;-;-;-;-;-;-;-;-;-;-;-;-	4126	0.195641	0.509329	0.45637
Mbd1	18;18;18;18;18;18;18;18;18;18;18;18;18;18;18	74268272;74269403;74273209;74273413;74273735;74274016;74274415;74274645;74275148;74275343;74276407;74276802;74277301;74277517;74281879	74268433;74269538;74273323;74273657;74273817;74274056;74274561;74274773;74275258;74275417;74276715;74276939;74277429;74277578;74282685	+;+;+;+;+;+;+;+;+;+;+;+;+;+;+	2689	10.6977	40.7996	21.8929
Mcm3	1;1;1;1;1;1;1;1;1;1;1;1;1;1;1;1;1;1;1;1;1;1;1;1;1;1;1;1;1;1;1;1;1;1;1;1;1;1	20802968;20802973;20803006;20803165;20804686;20804817;20804817;20804817;20805263;20805263;20805263;20805797;20806742;20806742;20808721;20808721;20809596;20809596;20810058;20810058;20811965;20811965;20812564;20812564;20812961;20812961;20814399;20814399;20814689;20814689;20816649;20816649;20817243;20817243;20817793;20817793;20820131;20820131	20803654;20803654;20803721;20803654;20804907;20804933;20804907;20804907;20805940;20805900;20805339;20805900;20806882;20806882;20808871;20808871;20809722;20809722;20810232;20810232;20812173;20812173;20812695;20812695;20813114;20813114;20814507;20814507;20814927;20814927;20816779;20816779;20817451;20817451;20817905;20817905;20820260;20820312	-;-;-;-;-;-;-;-;-;-;-;-;-;-;-;-;-;-;-;-;-;-;-;-;-;-;-;-;-;-;-;-;-;-;-;-;-;-	3752	0.312935	0.70836	0.643898
Megf9	4;4;4;4;4;4;4;4;4;4	70427065;70435217;70448663;70455861;70461826;70463312;70488131;70488131;70534228;70534228	70433531;70435486;70448806;70456000;70461865;70463506;70488332;70488332;70534928;70534995	-;-;-;-;-;-;-;-;-;-	8226	3.38102	8.18253	6.94494
Mfsd2a	4;4;4;4;4;4;4;4;4;4;4;4;4;4;4;4;4;4;4;4;4;4;4;4;4;4;4;4;4;4;4;4	122946850;122946850;122948532;122948532;122948801;122948801;122949267;122949479;122950152;122950152;122950414;122950414;122950661;122950661;122951191;122951191;122951789;122951789;122951990;122951990;122956732;122956732;122956732;122956759;122959270;122959270;122959270;122959270;122959892;122960941;122960941;122960941	122947304;122947304;122948708;122948708;122948944;122948944;122949379;122949562;122950235;122950235;122950535;122950535;122950751;122950751;122951348;122951348;122951867;122951867;122952128;122952128;122956856;122956856;122956856;122956856;122959401;122959398;122959401;122959401;122959990;122961188;122961188;122961152	-;-;-;-;-;-;-;-;-;-;-;-;-;-;-;-;-;-;-;-;-;-;-;-;-;-;-;-;-;-;-;-	2250	26.1897	69.569	64.2504
Mir3064	11	106782693	106782759	-	67	745.059	1554.51	1540.17
Mki67	7;7;7;7;7;7;7;7;7;7;7;7;7;7;7;7;7;7;7	135689784;135693080;135694232;135701902;135704068;135704339;135704543;135704636;135705610;135705610;135707361;135707361;135708766;135708766;135710845;135710845;135713757;135713961;135716048	135690133;135693496;135701067;135702057;135704239;135704457;135704795;135704795;135705785;135705785;135707486;135708320;135708811;135708811;135710911;135710911;135713872;135714039;135716361	-;-;-;-;-;-;-;-;-;-;-;-;-;-;-;-;-;-;-	10061	0.0583506	0.743349	0.222469
Mmd2	5;5;5;5;5;5;5;5;5;5	142562358;142567865;142569466;142574797;142575186;142580181;142580993;142582295;142608558;142608558	142564941;142567934;142569567;142574871;142575346;142580262;142582868;142582516;142608800;142608800	-;-;-;-;-;-;-;-;-;-	5193	0.0565247	0.595114	0.287344
Mpeg1	19;19	12460779;12461033	12460861;12465284	+;+	4335	1.59124	13.1744	5.40911
Mroh6	15;15;15;15;15;15;15;15;15;15;15;15;15;15	75884137;75884505;75884654;75884945;75885287;75885681;75885935;75886163;75886408;75886633;75887001;75887722;75888034;75888427	75884369;75884570;75884756;75885064;75885454;75885854;75886078;75886277;75886545;75886817;75887118;75887876;75888186;75888770	-;-;-;-;-;-;-;-;-;-;-;-;-;-	2216	0.331152	2.84498	1.8277
Ms4a6c	19;19;19;19;19;19;19;19;19;19	11469366;11469425;11471089;11471089;11472393;11472393;11475274;11478168;11480299;11481206	11469556;11469556;11471251;11471251;11472736;11472527;11475330;11478374;11480399;11482192	+;+;+;+;+;+;+;+;+;+	2050	0.143187	2.90199	1.21315
Mt2	8;8;8;8;8;8	94172664;94172860;94173127;94173127;94173336;94173336	94172875;94172952;94173192;94173192;94173564;94173568	+;+;+;+;+;+	588	24.5859	99.8608	91.4786
Mthfd1l	10;10;10;10;10;10;10;10;10;10;10;10;10;10;10;10;10;10;10;10;10;10;10;10;10;10;10;10;10;10;10;10;10;10;10;10;10;10;10;10;10;10;10;10;10;10;10;10;10;10;10;10;10;10;10;10;10;10;10;10;10;10;10;10;10;10;10;10;10;10;10;10;10;10;10;10;10;10;10;10;10;10;10;10;10;10;10;10;10;10;10	3973118;3973131;3973144;3978634;3978634;3978634;3980216;3980216;3980216;3980351;3980351;3980351;3984084;3984084;3984084;3985566;3985566;3985566;3989861;3989861;3989861;4007742;4007742;4007742;4015514;4015514;4015514;4016724;4016724;4016724;4018426;4018426;4018426;4028395;4028395;4028395;4030690;4030690;4030690;4032232;4032232;4032232;4032280;4033289;4033289;4033289;4033289;4035216;4035216;4035216…	3973478;3973478;3973478;3978718;3978718;3978718;3980266;3980266;3980266;3980404;3980404;3980404;3984208;3984208;3984208;3985666;3985666;3985666;3989997;3989997;3989997;4007853;4007853;4007853;4015605;4015605;4015605;4016821;4016821;4016821;4018599;4018599;4018599;4028531;4028531;4028531;4030736;4030736;4030736;4032339;4032339;4032339;4032339;4033363;4033363;4033363;4033363;4035318;4035318;4035318…	+;+;+;+;+;+;+;+;+;+;+;+;+;+;+;+;+;+;+;+;+;+;+;+;+;+;+;+;+;+;+;+;+;+;+;+;+;+;+;+;+;+;+;+;+;+;+;+;+;+;+;+;+;+;+;+;+;+;+;+;+;+;+;+;+;+;+;+;+;+;+;+;+;+;+;+;+;+;+;+;+;+;+;+;+;+;+;+;+;+;+	4435	0.380567	0.975558	0.897212
Mtl5	19;19;19;19;19;19;19;19;19;19;19;19;19;19;19;19;19;19;19;19;19;19;19;19;19;19;19;19;19;19;19;19;19	3388857;3388885;3389379;3389379;3391076;3392103;3392103;3392103;3392103;3393925;3393925;3393925;3393925;3395920;3395920;3395920;3395920;3396963;3396963;3396963;3396963;3402486;3402486;3402486;3404049;3404049;3404049;3404933;3404933;3404933;3406918;3406918;3406918	3389333;3389333;3389869;3389869;3391144;3392261;3392261;3392261;3392261;3394045;3394045;3394045;3394045;3395993;3395993;3395993;3395993;3397054;3397054;3398172;3397054;3402576;3402576;3402576;3404186;3404186;3404186;3405108;3405108;3405108;3407785;3407289;3407823	+;+;+;+;+;+;+;+;+;+;+;+;+;+;+;+;+;+;+;+;+;+;+;+;+;+;+;+;+;+;+;+;+	3912	0.150068	0.647789	0.381436
Myh1	11;11;11;11;11;11;11;11;11;11;11;11;11;11;11;11;11;11;11;11;11;11;11;11;11;11;11;11;11;11;11;11;11;11;11;11;11;11;11;11;11;11;11;11;11;11;11;11;11;11;11;11;11;11;11;11;11;11;11;11;11;11;11;11;11;11;11;11;11;11;11;11;11;11;11;11;11;11;11;11;11;11;11;11;11;11;11;11;11;11;11;11;11;11;11;11;11;11;11;11;11;11;11;11;11;11;11;11;11;11;11;11;11;11;11;11;11;11;11;11;11;11	67200052;67200111;67200138;67200404;67200410;67200410;67201842;67201842;67201842;67201846;67202174;67202174;67202174;67202174;67202433;67202433;67202433;67203576;67203576;67203576;67204349;67204349;67204349;67204563;67204563;67204563;67204768;67204768;67204768;67205502;67205502;67205502;67205689;67205689;67205689;67205913;67205913;67205913;67206270;67206270;67206270;67206477;67206477;67206477;672…	67200124;67200124;67200442;67200442;67200442;67200442;67202085;67202085;67202085;67202085;67202317;67202255;67202317;67202317;67202589;67202589;67202589;67203603;67203603;67203603;67204463;67204463;67204463;67204655;67204655;67204655;67204831;67204831;67204831;67205600;67205600;67205600;67205792;67205792;67205792;67206051;67206051;67206051;67206388;67206388;67206388;67206626;67206626;67206626;672…	+;+;+;+;+;+;+;+;+;+;+;+;+;+;+;+;+;+;+;+;+;+;+;+;+;+;+;+;+;+;+;+;+;+;+;+;+;+;+;+;+;+;+;+;+;+;+;+;+;+;+;+;+;+;+;+;+;+;+;+;+;+;+;+;+;+;+;+;+;+;+;+;+;+;+;+;+;+;+;+;+;+;+;+;+;+;+;+;+;+;+;+;+;+;+;+;+;+;+;+;+;+;+;+;+;+;+;+;+;+;+;+;+;+;+;+;+;+;+;+;+;+	6353	0.0173264	0.671303	6.24752
Naip2	13;13;13;13;13;13;13;13;13;13;13;13;13;13;13;13;13;13;13;13;13;13;13;13;13;13;13;13;13;13;13;13;13;13;13;13;13;13;13;13;13;13;13;13;13;13	100144063;100144063;100144231;100148708;100148708;100148708;100152070;100152070;100152070;100152494;100152494;100152494;100154855;100154855;100160121;100160121;100160121;100162842;100162842;100162842;100166469;100166469;100166469;100178247;100178247;100178247;100179349;100179349;100179349;100182905;100182905;100182905;100183757;100183757;100183757;100187393;100187393;100187393;100188831;100188831…	100144723;100144723;100144723;100148872;100148872;100148872;100152156;100152156;100152156;100152646;100152646;100152646;100155022;100155022;100162364;100162364;100162364;100162899;100162899;100162899;100166550;100166550;100166550;100178346;100178346;100178346;100179468;100179468;100179468;100182956;100182956;100182956;100183838;100183838;100183838;100187492;100187492;100187492;100189402;100189402…	-;-;-;-;-;-;-;-;-;-;-;-;-;-;-;-;-;-;-;-;-;-;-;-;-;-;-;-;-;-;-;-;-;-;-;-;-;-;-;-;-;-;-;-;-;-	4846	0.0681437	0.733387	0.315251
Naip6	13;13;13;13;13;13;13;13;13;13;13;13;13;13;13;13;13;13;13;13;13;13;13;13;13;13;13;13;13	100281121;100281121;100285677;100285677;100288101;100288101;100294733;100294733;100296886;100296886;100298740;100298740;100301335;100301335;100302184;100302184;100303236;100303236;100304349;100304349;100307027;100307027;100308199;100308199;100315435;100315435;100315984;100315984;100317612	100283913;100283913;100285841;100285841;100288187;100288187;100294885;100294885;100297053;100297053;100300851;100300851;100301392;100301392;100302265;100302265;100303335;100303335;100304468;100304468;100307078;100307078;100308280;100308280;100315534;100315534;100316675;100316616;100317674	-;-;-;-;-;-;-;-;-;-;-;-;-;-;-;-;-;-;-;-;-;-;-;-;-;-;-;-;-	6827	0.0752428	0.244446	0.21857
Nampt	12;12;12;12;12;12;12;12;12;12;12	32820335;32830167;32833032;32834902;32838299;32839151;32840925;32842685;32846706;32848617;32850423	32820626;32830323;32833135;32835030;32838457;32839287;32841150;32842804;32846846;32848751;32853369	+;+;+;+;+;+;+;+;+;+;+	4547	17.5774	60.6395	42.1565
Nckap1l	15;15;15;15;15;15;15;15;15;15;15;15;15;15;15;15;15;15;15;15;15;15;15;15;15;15;15;15;15;15;15	103453825;103454971;103455840;103460185;103461539;103462502;103462680;103464366;103464506;103471229;103471527;103472768;103473039;103473517;103473800;103474053;103475602;103475978;103478278;103478724;103481960;103483515;103486332;103486546;103486793;103487109;103489992;103490911;103491466;103493221;103497412	103453981;103455081;103455932;103460241;103461681;103462592;103462817;103464414;103464662;103471285;103471623;103472877;103473171;103473598;103473858;103474198;103475734;103476097;103478423;103478855;103482178;103483645;103486429;103486639;103486875;103487189;103490085;103491027;103491575;103493310;103498800	+;+;+;+;+;+;+;+;+;+;+;+;+;+;+;+;+;+;+;+;+;+;+;+;+;+;+;+;+;+;+	4717	0.404487	1.88688	0.82851
Neb	2;2;2;2;2;2;2;2;2;2;2;2;2;2;2;2;2;2;2;2;2;2;2;2;2;2;2;2;2;2;2;2;2;2;2;2;2;2;2;2;2;2;2;2;2;2;2;2;2;2;2;2;2;2;2;2;2;2;2;2;2;2;2;2;2;2;2;2;2;2;2;2;2;2;2;2;2;2;2;2;2;2;2;2;2;2;2;2;2;2;2;2;2;2;2;2;2;2;2;2;2;2;2;2;2;2;2;2;2;2;2;2;2;2;2;2;2;2;2;2;2;2;2;2;2;2;2;2;2;2;2;2;2;2;2;2;2;2;2;2;2;2;2;2;2;2;2;2;2;2;2;2;2;2;2;2;2;2;2;2;2;2;2;2;2;2;2;2;2;2;2;2;2;2;2;2;2;2;2;2;2;2;2;2;2;2;2;2;2;2;2;2;2;2;2;2;2;2;2;2…	52136647;52136662;52136662;52137117;52137261;52147140;52147140;52147140;52147140;52147140;52147637;52147637;52147637;52147637;52147637;52148761;52148761;52148761;52148761;52148761;52149094;52149094;52149094;52149094;52149094;52149590;52149590;52149590;52149590;52149590;52150537;52150537;52150537;52150967;52150967;52150967;52151364;52151364;52151364;52151364;52153056;52153056;52153683;52156341;521…	52137431;52137431;52137431;52137431;52137431;52147246;52147246;52147246;52147246;52147246;52147789;52147789;52147789;52147789;52147789;52148853;52148853;52148853;52148853;52148853;52149277;52149277;52149277;52149277;52149277;52149697;52149697;52149697;52149697;52149697;52150629;52150629;52150629;52151059;52151059;52151059;52151456;52151456;52151456;52151456;52153148;52153148;52153775;52156447;521…	-;-;-;-;-;-;-;-;-;-;-;-;-;-;-;-;-;-;-;-;-;-;-;-;-;-;-;-;-;-;-;-;-;-;-;-;-;-;-;-;-;-;-;-;-;-;-;-;-;-;-;-;-;-;-;-;-;-;-;-;-;-;-;-;-;-;-;-;-;-;-;-;-;-;-;-;-;-;-;-;-;-;-;-;-;-;-;-;-;-;-;-;-;-;-;-;-;-;-;-;-;-;-;-;-;-;-;-;-;-;-;-;-;-;-;-;-;-;-;-;-;-;-;-;-;-;-;-;-;-;-;-;-;-;-;-;-;-;-;-;-;-;-;-;-;-;-;-;-;-;-;-;-;-;-;-;-;-;-;-;-;-;-;-;-;-;-;-;-;-;-;-;-;-;-;-;-;-;-;-;-;-;-;-;-;-;-;-;-;-;-;-;-;-;-;-;-;-;-;-…	26582	0.248457	1.12579	1.06945
Nes	3;3;3;3;3;3;3;3;3;3;3	87971078;87971093;87971129;87972992;87972992;87972992;87974802;87974802;87975421;87975421;87976713	87971988;87971988;87971988;87973116;87973116;87973391;87974875;87974875;87976580;87980451;87980451	+;+;+;+;+;+;+;+;+;+;+	6416	0.13725	0.317906	0.32117
Nfam1	15;15;15;15;15;15;15;15;15;15;15;15;15;15;15;15;15;15	82997721;82997726;82997726;83001415;83001415;83001415;83010375;83010375;83010375;83014915;83014915;83014915;83016344;83016344;83016344;83022927;83029827;83033113	82999795;82999795;82999795;83001501;83001501;83001501;83010473;83010473;83010473;83015027;83015027;83015027;83016661;83016661;83016591;83023138;83029950;83033306	-;-;-;-;-;-;-;-;-;-;-;-;-;-;-;-;-;-	3222	0.136654	0.920798	0.518255
Nipal1	5;5;5;5;5;5;5;5;5;5;5;5;5	72647795;72647813;72647842;72658682;72658682;72660756;72660756;72663534;72663534;72666776;72666776;72667588;72667588	72647933;72647933;72647933;72659135;72658948;72660812;72660812;72663624;72663624;72666936;72666936;72667623;72671078	+;+;+;+;+;+;+;+;+;+;+;+;+	4393	0.317387	1.44919	2.47475
Nnmt	9;9;9;9;9;9;9;9;9;9;9;9;9;9	48591877;48591877;48591877;48591891;48592314;48592314;48596994;48597223;48603277;48603354;48603354;48604805;48604805;48604805	48592182;48592182;48592362;48592362;48592362;48592362;48597375;48597449;48603561;48603561;48603561;48605153;48605153;48605077	-;-;-;-;-;-;-;-;-;-;-;-;-;-	1576	0.046563	0.921638	0.78901
Nrep	18;18;18;18;18;18;18;18;18;18;18;18;18;18	33437019;33437019;33437019;33442816;33442816;33442816;33462021;33462021;33462021;33463378;33463378;33463378;33463600;33463853	33438839;33438839;33438839;33442893;33442893;33442893;33462087;33462087;33462087;33463419;33463419;33463634;33463747;33464029	-;-;-;-;-;-;-;-;-;-;-;-;-;-	2513	2.25815	26.514	7.39401
Nsdhl	X;X;X;X;X;X;X;X;X;X;X	72918557;72926294;72929624;72929752;72949165;72949165;72952843;72952843;72955072;72956337;72957282	72918693;72926410;72929782;72929782;72949311;72949311;72953656;72952971;72955214;72956439;72958514	+;+;+;+;+;+;+;+;+;+;+	2853	2.86151	7.46339	6.69964
Oas1a	5;5;5;5;5;5;5	120896256;120897180;120898319;120899073;120901870;120905596;120907294	120897024;120897206;120898472;120899305;120902054;120905884;120907521	-;-;-;-;-;-;-	1885	0.272511	1.73785	0.791606
Oas2	5;5;5;5;5;5;5;5;5;5;5;5;5;5;5;5;5;5;5;5;5;5;5;5;5;5;5;5;5;5	120730333;120730334;120730336;120733137;120733282;120733414;120733414;120733414;120734980;120734980;120734980;120734980;120735997;120735997;120735997;120738295;120738295;120738295;120738670;120738670;120741149;120741149;120743045;120743045;120745677;120745677;120748538;120748538;120749459;120749459	120731958;120731958;120731958;120733229;120733567;120733567;120733567;120733567;120735575;120735218;120735218;120735218;120736184;120736184;120736184;120738408;120738577;120738577;120738843;120738843;120741293;120741293;120743283;120743283;120745855;120745855;120748784;120748784;120749853;120749853	-;-;-;-;-;-;-;-;-;-;-;-;-;-;-;-;-;-;-;-;-;-;-;-;-;-;-;-;-;-	4451	0.131895	1.29144	0.542778
Onecut1	9;9;9;9	74861921;74866484;74889306;74889306	74863401;74866639;74891781;74890360	+;+;+;+	4113	2.53353	17.2667	14.3995
Orm1	4;4;4;4;4;4	63344560;63345069;63345421;63346040;63346282;63347970	63344714;63345211;63345491;63346147;63346385;63348163	+;+;+;+;+;+	775	239.04	830.195	508.761
Orm2	4;4;4;4;4;4	63362449;63362944;63363294;63363918;63364162;63365685	63362603;63363086;63363364;63364025;63364265;63365878	+;+;+;+;+;+	775	6.95957	206.587	77.8178
Orm3	4;4;4;4;4;4	63356162;63356571;63356911;63357544;63357789;63359317	63356313;63356713;63356981;63357651;63357892;63359511	+;+;+;+;+;+	773	0.237333	2.5587	3.56199
Osbpl5	7;7;7;7;7;7;7;7;7;7;7;7;7;7;7;7;7;7;7;7;7;7;7;7;7;7;7;7;7;7;7;7;7;7;7;7;7;7;7;7;7;7;7;7;7;7;7;7;7;7;7;7;7;7;7;7;7;7;7;7;7;7;7	143688762;143688762;143688762;143691888;143691888;143691888;143692858;143692858;143692858;143693772;143693772;143693772;143694198;143694198;143694198;143694264;143694809;143694809;143694809;143695040;143695040;143695515;143695515;143699234;143699234;143700714;143700714;143701192;143701192;143702690;143702690;143703054;143703151;143703151;143704510;143704510;143704510;143704969;143704969;143704969…	143689957;143689957;143689957;143691990;143691990;143691990;143692984;143692984;143692984;143693898;143693898;143693898;143694383;143694561;143694383;143694383;143695087;143694945;143694945;143695129;143695129;143695612;143695612;143699332;143699332;143700810;143700810;143701290;143701290;143702771;143702771;143703335;143703335;143703335;143704702;143704702;143704702;143705119;143705140;143705140…	-;-;-;-;-;-;-;-;-;-;-;-;-;-;-;-;-;-;-;-;-;-;-;-;-;-;-;-;-;-;-;-;-;-;-;-;-;-;-;-;-;-;-;-;-;-;-;-;-;-;-;-;-;-;-;-;-;-;-;-;-;-;-	4915	0.537497	1.35815	1.13487
P2ry12	3;3;3;3;3;3;3;3;3;3;3;3;3;3;3;3	59216272;59216359;59216360;59216361;59217905;59219934;59219934;59219934;59219934;59219934;59220219;59220219;59227451;59227451;59262774;59262774	59218256;59218256;59218256;59218256;59218256;59220096;59220096;59220200;59220096;59220096;59220259;59220283;59227581;59227581;59262871;59262831	-;-;-;-;-;-;-;-;-;-;-;-;-;-;-;-	2546	0.288229	1.38377	1.00472
P4ha1	10;10;10;10;10;10;10;10;10;10;10;10;10;10;10;10;10;10;10;10;10;10;10;10;10;10;10;10;10;10;10;10;10;10;10;10;10;10;10;10;10;10;10;10	59323296;59323364;59323368;59337054;59337054;59337054;59339296;59339296;59339296;59342684;59342684;59342684;59343657;59343657;59343657;59348181;59348181;59350404;59350404;59350404;59352083;59352083;59352083;59354340;59355350;59355350;59361861;59361861;59361861;59365289;59365289;59365289;59367289;59367289;59367289;59369241;59369241;59369241;59369587;59369587;59369587;59371004;59371004;59371004	59323476;59323476;59323476;59337156;59337156;59337156;59339392;59339392;59339392;59342835;59342835;59342835;59343794;59343794;59343794;59348420;59348420;59350600;59350600;59350600;59352259;59352259;59352259;59354410;59355420;59355420;59361960;59361960;59361960;59365342;59365342;59365342;59367354;59367354;59367354;59369309;59369309;59369309;59369683;59369683;59369683;59372251;59371956;59373304	+;+;+;+;+;+;+;+;+;+;+;+;+;+;+;+;+;+;+;+;+;+;+;+;+;+;+;+;+;+;+;+;+;+;+;+;+;+;+;+;+;+;+;+	4114	2.28319	12.8305	5.26789
Parp14	16;16;16;16;16;16;16;16;16;16;16;16;16;16;16;16;16;16;16;16;16;16;16;16	35832874;35835991;35839262;35840722;35841409;35844244;35844728;35845270;35846010;35852732;35853519;35856483;35857265;35860430;35863360;35863360;35865119;35865119;35865925;35866149;35866149;35871167;35871167;35871167	35834935;35836165;35839395;35841321;35841630;35844411;35844790;35845419;35846085;35852953;35853758;35858764;35860666;35860666;35863593;35863593;35865152;35865152;35866288;35866288;35866288;35871382;35871382;35871544	-;-;-;-;-;-;-;-;-;-;-;-;-;-;-;-;-;-;-;-;-;-;-;-	9306	1.71117	5.47616	3.58869
Parvb	15;15;15;15;15;15;15;15;15;15;15;15;15;15;15;15;15;15;15;15;15;15;15	84232043;84232066;84257140;84260646;84271231;84271231;84271231;84271291;84273499;84273499;84273499;84282762;84282762;84290387;84290387;84292782;84295557;84297966;84303408;84303835;84308853;84312703;84312955	84232186;84232186;84257205;84260874;84271318;84271320;84271320;84271320;84273906;84273569;84273569;84282864;84282864;84290434;84290527;84292897;84295615;84297985;84303469;84303903;84308954;84312775;84315688	+;+;+;+;+;+;+;+;+;+;+;+;+;+;+;+;+;+;+;+;+;+;+	4416	0.432057	1.00775	1.08611
Pcolce2	9;9;9;9;9;9;9;9;9;9;9;9;9;9	95637601;95638652;95670005;95678345;95680306;95681533;95681533;95686686;95686686;95692861;95692861;95694624;95694624;95694966	95637873;95638760;95670260;95678469;95680492;95681669;95681669;95686840;95686840;95692944;95692944;95694683;95694791;95698096	+;+;+;+;+;+;+;+;+;+;+;+;+;+	4625	0.126933	0.594699	0.384087
Pcsk9	4;4;4;4;4;4;4;4;4;4;4;4	106442329;106444677;106446596;106447130;106447507;106448860;106450040;106454225;106454513;106456865;106458837;106463695	106443558;106444858;106446773;106447278;106447680;106449043;106450236;106454366;106454646;106456988;106459028;106464329	-;-;-;-;-;-;-;-;-;-;-;-	3521	1.18797	4.51145	2.82529
Pcyox1l	18;18;18;18;18;18;18;18;18;18;18;18;18	61696837;61698364;61699293;61699475;61702196;61702196;61702884;61703346;61703512;61703512;61707494;61707494;61707494	61697976;61698504;61699504;61699504;61702370;61702370;61703718;61703394;61703718;61703718;61707613;61707635;61707635	-;-;-;-;-;-;-;-;-;-;-;-;-	2645	0.499394	1.19177	1.5044
Per2	1;1;1;1;1;1;1;1;1;1;1;1;1;1;1;1;1;1;1;1;1;1;1;1;1;1	91415982;91419375;91420406;91421368;91423690;91427739;91429384;91430774;91430978;91432808;91433396;91434622;91435017;91435650;91438334;91439887;91440832;91444585;91445501;91447722;91448708;91448708;91449813;91449813;91450605;91459173	91418020;91419525;91420598;91421554;91424486;91427978;91429548;91430880;91431140;91432892;91433521;91434730;91435170;91435756;91438412;91440029;91440883;91444786;91445622;91447744;91448862;91448862;91449865;91449878;91450843;91459324	-;-;-;-;-;-;-;-;-;-;-;-;-;-;-;-;-;-;-;-;-;-;-;-;-;-	5856	3.42104	14.2067	11.4544
Per3	4;4;4;4;4;4;4;4;4;4;4;4;4;4;4;4;4;4;4;4;4;4;4;4;4;4;4;4;4;4;4;4;4;4;4;4;4;4;4;4;4;4;4;4;4;4;4;4;4;4;4;4;4;4;4;4;4;4;4;4;4;4;4;4;4;4;4	151003652;151003786;151008228;151008228;151009250;151009250;151010402;151010402;151011437;151011437;151012241;151012241;151013542;151013542;151013542;151013542;151016009;151017899;151017899;151017899;151018218;151018218;151018852;151018852;151018852;151024190;151024410;151024410;151024410;151025072;151025072;151025072;151025072;151026113;151026113;151026113;151026113;151027212;151028749;151028749…	151005959;151005959;151008378;151008378;151009433;151009433;151010498;151010498;151012929;151012929;151012932;151012932;151013769;151013769;151013769;151013769;151016145;151018066;151018066;151018066;151018333;151018333;151018987;151018987;151018987;151024539;151024539;151024539;151024539;151025200;151025200;151025200;151025200;151026218;151026218;151026218;151026218;151027404;151028905;151028905…	-;-;-;-;-;-;-;-;-;-;-;-;-;-;-;-;-;-;-;-;-;-;-;-;-;-;-;-;-;-;-;-;-;-;-;-;-;-;-;-;-;-;-;-;-;-;-;-;-;-;-;-;-;-;-;-;-;-;-;-;-;-;-;-;-;-;-	9608	1.75668	3.69899	4.63328
Pfkfb3	2;2;2;2;2;2;2;2;2;2;2;2;2;2;2;2;2;2;2;2;2;2;2;2;2;2;2;2;2;2;2;2;2;2;2;2;2;2;2;2;2;2;2;2;2;2;2;2;2;2;2;2;2;2;2;2;2;2;2;2;2;2;2;2;2;2;2;2;2;2;2;2;2;2;2;2;2;2;2;2;2;2;2;2;2;2;2;2;2;2;2;2;2;2;2;2;2;2;2;2;2;2;2;2;2;2;2;2;2;2;2;2;2;2;2;2;2;2;2;2;2;2;2;2;2;2;2;2;2;2;2;2;2;2;2;2;2;2;2;2;2;2;2;2;2;2;2;2;2;2;2;2;2;2;2;2;2;2;2;2;2;2;2;2;2;2;2;2;2;2;2;2;2;2;2;2;2;2;2;2;2;2;2;2;2;2;2;2;2;2;2;2;2;2;2;2;2;2;2;2…	11471433;11471791;11471824;11471826;11471826;11471828;11474393;11474407;11474407;11474407;11474407;11475754;11475754;11475764;11475764;11477955;11477967;11478036;11478036;11478036;11478036;11478036;11478036;11479900;11480198;11480198;11480198;11480198;11480198;11480198;11480198;11480198;11480198;11480198;11480198;11480198;11480198;11481010;11481247;11481247;11481247;11481247;11481247;11481871;114…	11474543;11474543;11474543;11474543;11474543;11471921;11474543;11474543;11474543;11474543;11474543;11475806;11475806;11475806;11475806;11478058;11478058;11478058;11478058;11478058;11478058;11478058;11478058;11480371;11480371;11480371;11480371;11480371;11480371;11480371;11480371;11480371;11480371;11480371;11480371;11480371;11480371;11481333;11481333;11481333;11481333;11481333;11481333;11481935;114…	-;-;-;-;-;-;-;-;-;-;-;-;-;-;-;-;-;-;-;-;-;-;-;-;-;-;-;-;-;-;-;-;-;-;-;-;-;-;-;-;-;-;-;-;-;-;-;-;-;-;-;-;-;-;-;-;-;-;-;-;-;-;-;-;-;-;-;-;-;-;-;-;-;-;-;-;-;-;-;-;-;-;-;-;-;-;-;-;-;-;-;-;-;-;-;-;-;-;-;-;-;-;-;-;-;-;-;-;-;-;-;-;-;-;-;-;-;-;-;-;-;-;-;-;-;-;-;-;-;-;-;-;-;-;-;-;-;-;-;-;-;-;-;-;-;-;-;-;-;-;-;-;-;-;-;-;-;-;-;-;-;-;-;-;-;-;-;-;-;-;-;-;-;-;-;-;-;-;-;-;-;-;-;-;-;-;-;-;-;-;-;-;-;-;-;-;-;-;-;-…	7561	0.951138	5.79992	2.73473
Pik3r5	11;11;11;11;11;11;11;11;11;11;11;11;11;11;11;11;11;11;11;11;11;11;11;11;11;11;11;11;11;11;11;11;11;11;11;11;11;11;11;11;11;11;11;11;11;11;11;11;11;11;11	68432121;68432125;68432160;68439800;68473795;68473795;68473795;68475403;68475403;68475403;68475481;68476305;68476305;68476305;68476305;68477444;68477444;68477444;68486551;68486551;68486551;68490472;68490472;68490472;68490789;68490789;68490789;68491947;68491947;68491947;68492252;68492252;68492252;68493076;68493076;68493542;68493542;68494155;68494158;68494462;68494462;68494782;68494782;68495175;684…	68432262;68432262;68432262;68440372;68473910;68473910;68473910;68475503;68475503;68475503;68475503;68476373;68476764;68476373;68476373;68477582;68477582;68477582;68486620;68486620;68486620;68490646;68490646;68490646;68490942;68490942;68490942;68492030;68492030;68492030;68493330;68492951;68492951;68493238;68493238;68493667;68493667;68494283;68494283;68494555;68494555;68494858;68494858;68495268;684…	+;+;+;+;+;+;+;+;+;+;+;+;+;+;+;+;+;+;+;+;+;+;+;+;+;+;+;+;+;+;+;+;+;+;+;+;+;+;+;+;+;+;+;+;+;+;+;+;+;+;+	5550	0.185111	0.634791	0.672152
Pilrb1	5;5;5;5;5;5;5;5;5;5;5;5;5;5;5;5;5;5	137852147;137852147;137852147;137852147;137852149;137853025;137853025;137853025;137854878;137854878;137854878;137857156;137857156;137857156;137857450;137857860;137857860;137857860	137852368;137852368;137852368;137852368;137853188;137853055;137853250;137853188;137855067;137855067;137854950;137857542;137857542;137857376;137857571;137858049;137858106;137858049	-;-;-;-;-;-;-;-;-;-;-;-;-;-;-;-;-;-	1957	0.149991	0.768422	0.835099
Pilrb2	5;5;5;5;5;5;5;5;5;5;5;5;5;5;5;5;5;5	137865827;137865827;137865827;137865827;137865829;137866705;137866705;137866705;137868578;137868578;137868578;137870865;137870865;137870865;137871159;137871569;137871569;137871569	137866048;137866048;137866048;137866048;137866868;137866735;137866868;137866930;137868767;137868767;137868650;137871251;137871251;137871085;137871280;137871758;137871815;137871707	-;-;-;-;-;-;-;-;-;-;-;-;-;-;-;-;-;-	1957	0.224987	0.884333	0.726173
Pira2	7;7;7;7;7;7;7;7;7;7;7;7;7;7;7;7;7;7;7	3836812;3838202;3840634;3840917;3840917;3841479;3841479;3842003;3842003;3842438;3842438;3843881;3843881;3844334;3844334;3844800;3844800;3844990;3844990	3838339;3838339;3840684;3841219;3841219;3841775;3841775;3842311;3842311;3842722;3842722;3844186;3844186;3844618;3844618;3844835;3844835;3845051;3845051	-;-;-;-;-;-;-;-;-;-;-;-;-;-;-;-;-;-;-	3462	0.0674057	0.495433	0.302121
Pirb	7;7;7;7;7;7;7;7;7;7;7;7;7;7;7;7;7;7;7;7;7;7;7;7;7;7;7;7;7;7;7;7;7;7;7;7;7;7;7;7;7;7;7;7;7;7;7;7;7;7;7;7;7;7;7;7;7;7;7;7;7;7;7	3711409;3712532;3712537;3712537;3712908;3712908;3712908;3712908;3713820;3713820;3713820;3713820;3714097;3714097;3714097;3714097;3714209;3714209;3714209;3714209;3714238;3714587;3714587;3714587;3714587;3714587;3715682;3715682;3715682;3715682;3715682;3716034;3716034;3716034;3716034;3716034;3716594;3716594;3716594;3716594;3717118;3717118;3717552;3717552;3717552;3717552;3717552;3719182;3719182;3719182…	3712830;3712830;3712830;3712830;3713063;3713063;3713063;3713063;3713872;3713872;3713872;3713872;3714134;3714134;3714134;3714134;3714284;3714284;3714284;3714284;3714284;3714703;3714703;3714703;3714703;3714703;3715732;3715732;3715732;3715732;3715732;3716217;3716336;3717426;3716336;3716336;3717426;3717426;3716890;3716890;3717426;3717426;3717836;3717836;3717836;3717836;3717836;3719487;3719487;3719487…	-;-;-;-;-;-;-;-;-;-;-;-;-;-;-;-;-;-;-;-;-;-;-;-;-;-;-;-;-;-;-;-;-;-;-;-;-;-;-;-;-;-;-;-;-;-;-;-;-;-;-;-;-;-;-;-;-;-;-;-;-;-;-	4471	0.56133	2.3041	1.53698
Pitpnc1	11;11;11;11;11;11;11;11;11;11;11;11;11;11;11;11;11;11;11;11;11;11;11;11;11;11;11;11;11	107207892;107207892;107216678;107226231;107226231;107226257;107234347;107234347;107234347;107252022;107252022;107252022;107296199;107296199;107296199;107320629;107320793;107320793;107320793;107321587;107321587;107321587;107321587;107337412;107337412;107337412;107337412;107348089;107469891	107212658;107212658;107216796;107226294;107226294;107226294;107234502;107234502;107234502;107252117;107252117;107252117;107296270;107296270;107296270;107320800;107320800;107320800;107320800;107321675;107321675;107321675;107321675;107337526;107337560;107337560;107337637;107348130;107470699	-;-;-;-;-;-;-;-;-;-;-;-;-;-;-;-;-;-;-;-;-;-;-;-;-;-;-;-;-	6612	2.72468	7.77047	8.65095
Pklr	3;3;3;3;3;3;3;3;3;3;3;3;3;3;3;3;3;3;3;3;3;3;3;3;3;3;3;3;3;3;3;3	89136142;89136174;89136572;89136579;89136623;89137224;89137224;89137224;89137224;89137224;89137609;89140851;89141315;89141315;89141315;89141506;89141506;89141506;89141763;89141763;89142206;89142206;89142592;89142592;89142962;89142962;89143210;89143210;89144826;89144826;89145467;89145467	89136282;89136282;89136637;89136618;89136637;89137406;89137406;89137406;89137459;89137406;89137686;89140912;89141406;89141406;89141406;89141539;89141637;89141637;89141949;89141949;89142476;89142476;89142742;89142742;89143114;89143114;89143376;89143376;89145007;89145007;89146784;89146594	+;+;+;+;+;+;+;+;+;+;+;+;+;+;+;+;+;+;+;+;+;+;+;+;+;+;+;+;+;+;+;+	3236	15.1823	54.6746	52.4723
Plac8	5;5;5;5;5;5;5;5;5;5;5;5;5;5;5;5	100553725;100553726;100553727;100556480;100556480;100556480;100559752;100559752;100559752;100562438;100562625;100562625;100562625;100562841;100572145;100572145	100553988;100553988;100553988;100556595;100556595;100556595;100559876;100559876;100559876;100562762;100562762;100562858;100562762;100563423;100572192;100572245	-;-;-;-;-;-;-;-;-;-;-;-;-;-;-;-	1592	0.55314	2.64006	1.47289
Plcb2	2;2;2;2;2;2;2;2;2;2;2;2;2;2;2;2;2;2;2;2;2;2;2;2;2;2;2;2;2;2;2;2;2;2;2;2;2;2;2;2;2;2;2;2;2;2;2;2;2;2;2;2;2;2;2;2;2;2;2;2;2;2;2;2;2;2;2;2;2;2;2;2;2;2;2;2;2;2;2;2;2;2;2;2;2;2;2;2;2;2;2;2;2;2;2;2	118707517;118707996;118708180;118708699;118709538;118709538;118709538;118709538;118710203;118710203;118710203;118710727;118710727;118710817;118710921;118710921;118710921;118711093;118711093;118711093;118711336;118711336;118711336;118711682;118711682;118711682;118711931;118711931;118711931;118712129;118712129;118712129;118712367;118712367;118712367;118713129;118713129;118713129;118713735;118713735…	118709202;118709202;118709202;118709202;118709741;118709624;118709624;118709624;118711370;118710260;118710260;118710822;118710822;118710822;118710997;118710997;118710997;118711255;118711255;118711255;118711546;118711546;118711546;118711729;118711729;118711729;118712003;118712003;118712003;118712223;118712223;118712223;118712471;118712471;118712471;118713228;118713228;118713228;118714104;118713899…	-;-;-;-;-;-;-;-;-;-;-;-;-;-;-;-;-;-;-;-;-;-;-;-;-;-;-;-;-;-;-;-;-;-;-;-;-;-;-;-;-;-;-;-;-;-;-;-;-;-;-;-;-;-;-;-;-;-;-;-;-;-;-;-;-;-;-;-;-;-;-;-;-;-;-;-;-;-;-;-;-;-;-;-;-;-;-;-;-;-;-;-;-;-;-;-	6597	0.111237	0.384137	0.258503
Pld4	12;12;12;12;12;12;12;12;12;12;12	112760655;112762526;112763397;112763963;112764448;112764998;112766703;112767498;112767754;112768025;112768426	112760783;112762609;112763563;112764146;112764568;112765125;112766903;112767637;112767919;112768121;112768986	+;+;+;+;+;+;+;+;+;+;+	1978	0.408097	1.90613	1.18546
Plekhg1	10;10;10;10;10;10;10;10;10;10;10;10;10;10;10;10;10;10;10;10;10;10;10;10;10;10;10;10;10;10;10;10;10;10;10;10;10;10;10;10;10;10;10;10;10;10;10;10;10;10;10;10;10;10;10;10;10;10;10;10;10;10;10;10;10;10;10;10;10;10;10;10;10;10;10;10;10;10;10;10;10;10;10;10;10	3740364;3740378;3740665;3802740;3802740;3802740;3872667;3872667;3872927;3872927;3872927;3872927;3872927;3903557;3903557;3903557;3903557;3903557;3903582;3903586;3919136;3919136;3919136;3919136;3919136;3919136;3919136;3930207;3930207;3930207;3930207;3930207;3930207;3933597;3933597;3933597;3933597;3933597;3933597;3937850;3937850;3937850;3937850;3937850;3937850;3940169;3940169;3940169;3940169;3940438…	3740540;3740540;3741007;3802800;3802800;3802800;3872725;3872725;3873441;3873441;3873441;3873441;3873441;3903657;3903657;3903657;3903657;3903657;3903657;3903657;3919362;3919205;3919205;3919205;3919205;3919205;3919205;3930253;3930253;3930253;3930253;3930253;3930253;3933747;3933747;3933747;3933747;3933747;3933747;3937981;3937981;3937981;3938577;3938595;3937981;3940351;3940351;3940351;3940351;3940533…	+;+;+;+;+;+;+;+;+;+;+;+;+;+;+;+;+;+;+;+;+;+;+;+;+;+;+;+;+;+;+;+;+;+;+;+;+;+;+;+;+;+;+;+;+;+;+;+;+;+;+;+;+;+;+;+;+;+;+;+;+;+;+;+;+;+;+;+;+;+;+;+;+;+;+;+;+;+;+;+;+;+;+;+;+	8739	0.201533	0.551673	0.422807
Pls1	9;9;9;9;9;9;9;9;9;9;9;9;9;9;9;9;9;9;9;9;9;9;9;9	95752642;95754661;95761313;95761934;95765691;95769094;95773518;95775308;95776466;95776689;95782370;95784100;95784181;95785490;95785490;95785554;95786933;95786933;95786933;95795762;95795762;95815246;95845171;95845171	95754437;95754785;95761436;95762067;95765805;95769172;95773713;95775403;95776608;95776854;95782451;95784232;95784232;95785619;95785619;95785619;95787096;95787096;95787096;95795866;95795866;95815406;95845311;95845286	-;-;-;-;-;-;-;-;-;-;-;-;-;-;-;-;-;-;-;-;-;-;-;-	3890	0.697989	1.89875	2.26502
Pltp	2;2;2;2;2;2;2;2;2;2;2;2;2;2;2;2;2;2;2;2;2;2;2;2;2;2;2;2;2;2;2;2;2;2;2;2;2;2;2;2;2;2;2;2;2;2;2;2;2;2;2;2;2;2;2;2;2;2;2;2;2;2;2;2;2;2;2;2;2	164839518;164839518;164839518;164840114;164840114;164840114;164840321;164840321;164840321;164840495;164840495;164840495;164844435;164844435;164844435;164844595;164844595;164844595;164846594;164846594;164846594;164846740;164846740;164846740;164846813;164851513;164851513;164851513;164851513;164852473;164852473;164852473;164852473;164852473;164852610;164852617;164852617;164852617;164852617;164854266…	164839828;164839828;164839828;164840190;164840190;164840190;164840384;164840384;164840384;164840537;164840537;164840537;164844502;164844502;164844502;164844759;164844759;164844759;164846653;164846653;164846653;164846916;164846916;164846916;164846916;164851604;164851604;164851604;164851604;164852680;164852536;164852536;164852536;164852536;164852680;164852680;164852680;164852680;164852680;164854421…	-;-;-;-;-;-;-;-;-;-;-;-;-;-;-;-;-;-;-;-;-;-;-;-;-;-;-;-;-;-;-;-;-;-;-;-;-;-;-;-;-;-;-;-;-;-;-;-;-;-;-;-;-;-;-;-;-;-;-;-;-;-;-;-;-;-;-;-;-	2562	6.53059	28.914	17.5837
Plxdc1	11;11;11;11;11;11;11;11;11;11;11;11;11;11;11;11;11;11;11;11;11;11;11;11;11;11;11;11;11;11;11;11;11;11;11;11;11;11	97923238;97923656;97925813;97925813;97928434;97928434;97932207;97932207;97933975;97933975;97936843;97938530;97938530;97940813;97940813;97940813;97953883;97953883;97953883;97954751;97954751;97954751;97955401;97955401;97955401;97956099;97956099;97956423;97956423;97956423;97978256;97978503;97978503;97978503;97986238;97986238;97986238;97986238	97924607;97924607;97925973;97925973;97928469;97928469;97932339;97932339;97934035;97934035;97938611;97938611;97938611;97940908;97940908;97940908;97953982;97953982;97953982;97954828;97954869;97954869;97955523;97955523;97955523;97956168;97956168;97956566;97956587;97956566;97978681;97978681;97978681;97978681;97986433;97986430;97986399;97986444	-;-;-;-;-;-;-;-;-;-;-;-;-;-;-;-;-;-;-;-;-;-;-;-;-;-;-;-;-;-;-;-;-;-;-;-;-;-	4836	0.0606975	0.242838	0.23509
Pnldc1	17;17;17;17;17;17;17;17;17;17;17;17;17;17;17;17;17;17;17	12888902;12890076;12890279;12890721;12892136;12892320;12892759;12894360;12895512;12897261;12899533;12899841;12903208;12905506;12905762;12906498;12909053;12909462;12909836	12888969;12890174;12890454;12890820;12892178;12892373;12892823;12894415;12895597;12897330;12899676;12899917;12903308;12905594;12905885;12906537;12909126;12909519;12910000	-;-;-;-;-;-;-;-;-;-;-;-;-;-;-;-;-;-;-	1689	0.217239	0.76849	0.799328
Pnpla3	15;15;15;15;15;15;15;15	84167816;84171082;84172716;84174268;84176816;84179180;84180920;84185977	84168060;84171314;84172781;84174477;84176876;84179335;84181052;84189512	+;+;+;+;+;+;+;+	4640	0.0632614	0.772607	0.382845
Pou2f2	7;7;7;7;7;7;7;7;7;7;7;7;7;7;7;7;7;7;7;7;7;7;7;7;7;7;7;7;7;7;7;7;7;7;7;7;7;7;7;7;7;7;7;7;7;7;7;7;7;7;7;7;7;7;7;7;7;7;7;7;7;7;7;7;7;7;7;7;7;7;7;7;7;7;7;7;7;7;7;7;7;7;7;7;7;7;7;7;7;7;7;7;7;7;7;7;7;7;7;7;7;7;7;7;7;7;7;7;7;7;7;7;7;7;7;7;7;7;7;7;7	25087344;25087344;25092476;25092520;25092520;25092520;25092656;25093248;25093288;25093485;25093485;25093485;25093485;25093485;25093485;25093485;25094790;25094790;25094790;25094790;25094790;25094790;25094790;25094790;25096890;25096890;25096890;25096890;25096890;25096890;25096890;25096890;25097142;25097142;25097142;25097142;25097142;25097142;25097142;25097142;25097393;25097393;25097393;25097393;250…	25093002;25093002;25093361;25093002;25093002;25093002;25093002;25093686;25093361;25093550;25093686;25093686;25093686;25093686;25093686;25093686;25094856;25094856;25094856;25094856;25094856;25094856;25094856;25094856;25097066;25097066;25097066;25097066;25097066;25097066;25097066;25097066;25097290;25097290;25097290;25097290;25097290;25097290;25097290;25097290;25097534;25097534;25097534;25097534;250…	-;-;-;-;-;-;-;-;-;-;-;-;-;-;-;-;-;-;-;-;-;-;-;-;-;-;-;-;-;-;-;-;-;-;-;-;-;-;-;-;-;-;-;-;-;-;-;-;-;-;-;-;-;-;-;-;-;-;-;-;-;-;-;-;-;-;-;-;-;-;-;-;-;-;-;-;-;-;-;-;-;-;-;-;-;-;-;-;-;-;-;-;-;-;-;-;-;-;-;-;-;-;-;-;-;-;-;-;-;-;-;-;-;-;-;-;-;-;-;-;-	8243	0.129086	0.648604	0.624962
Ppargc1a	5;5;5;5;5;5;5;5;5;5;5;5;5;5;5;5;5;5;5;5;5;5;5;5;5;5;5;5;5;5;5;5;5;5;5;5;5;5;5;5;5;5;5;5;5;5;5;5;5;5;5;5;5;5	51454250;51457653;51457655;51458180;51462706;51462706;51462706;51463206;51463206;51463206;51472598;51472598;51472598;51472598;51472879;51472879;51472879;51472879;51473496;51473496;51473496;51473496;51490017;51490017;51490017;51490017;51490200;51490200;51490200;51490200;51494601;51494601;51494601;51494601;51495670;51495670;51495670;51495670;51495780;51498034;51498034;51498034;51498034;51498034;515…	51458283;51458283;51458283;51458283;51462857;51462857;51462857;51463327;51463327;51463327;51472718;51472718;51472718;51472718;51472983;51472983;51472983;51472983;51474411;51474411;51474411;51474411;51490121;51490090;51490121;51490090;51490245;51490245;51490245;51490245;51494805;51494805;51494805;51494805;51495795;51495795;51495795;51495795;51495795;51498228;51498228;51498228;51498228;51498228;515…	-;-;-;-;-;-;-;-;-;-;-;-;-;-;-;-;-;-;-;-;-;-;-;-;-;-;-;-;-;-;-;-;-;-;-;-;-;-;-;-;-;-;-;-;-;-;-;-;-;-;-;-;-;-	6592	2.32662	6.77906	6.88247
Ppfia2	10;10;10;10;10;10;10;10;10;10;10;10;10;10;10;10;10;10;10;10;10;10;10;10;10;10;10;10;10;10;10;10;10;10;10;10;10;10;10	106470310;106470346;106474632;106474632;106557246;106557246;106743487;106743487;106761983;106761983;106767474;106767474;106776415;106800737;106819336;106828889;106830566;106835696;106836052;106837281;106842686;106854937;106857409;106858161;106859777;106863254;106865247;106869879;106893432;106896318;106903643;106904817;106906366;106907713;106913565;106915681;106927703;106929054;106931123	106470591;106470591;106474882;106474882;106557299;106557299;106743588;106743588;106762147;106762147;106767548;106767548;106777999;106800853;106819557;106829035;106830700;106835779;106836183;106837343;106842777;106855072;106857629;106858398;106859806;106863384;106865401;106869972;106893513;106896518;106903705;106904846;106906559;106907810;106913740;106915749;106927862;106929145;106933467	+;+;+;+;+;+;+;+;+;+;+;+;+;+;+;+;+;+;+;+;+;+;+;+;+;+;+;+;+;+;+;+;+;+;+;+;+;+;+	8021	0.0457444	0.18494	0.14174
Ppp1r10	17;17;17;17;17;17;17;17;17;17;17;17;17;17;17;17;17;17;17;17;17;17;17;17;17;17;17;17;17;17;17;17;17;17;17;17;17;17;17;17;17;17;17;17;17;17;17;17;17;17;17;17;17;17	35916434;35916566;35916579;35916782;35916998;35917196;35917198;35917198;35917198;35917198;35917198;35923308;35923308;35923308;35924013;35924037;35924037;35924245;35924245;35924245;35924858;35924858;35926202;35926202;35926400;35926400;35926494;35926772;35926772;35926772;35926974;35926974;35926974;35927910;35927910;35927910;35928182;35928182;35928403;35928403;35928652;35928652;35929221;35929221;359…	35916598;35916598;35916771;35917005;35917005;35917716;35918358;35917340;35917716;35917764;35917716;35923425;35923425;35923425;35924123;35924123;35924123;35924295;35924380;35924380;35924909;35924909;35926279;35926279;35926573;35926573;35926573;35926877;35926877;35926877;35927086;35927086;35927086;35928329;35928010;35928010;35928329;35928329;35928561;35928561;35928898;35928898;35929284;35929284;359…	+;+;+;+;+;+;+;+;+;+;+;+;+;+;+;+;+;+;+;+;+;+;+;+;+;+;+;+;+;+;+;+;+;+;+;+;+;+;+;+;+;+;+;+;+;+;+;+;+;+;+;+;+;+	5623	1.99673	11.9393	6.74167
Ppp1r3g	13;13;13;13	35958839;35967853;35968158;35968158	35958996;35967982;35968324;35970388	+;+;+;+	2519	3.00058	17.1513	16.5017
Prim2	1;1;1;1;1;1;1;1;1;1;1;1;1;1;1;1;1;1;1;1;1	33453810;33464053;33478942;33480458;33484682;33484682;33512016;33512016;33514145;33514145;33533296;33533296;33620878;33622064;33628395;33630338;33662246;33663777;33667045;33668858;33669624	33454304;33464121;33480540;33480540;33484808;33484808;33512201;33512201;33514217;33514217;33533363;33533363;33623324;33622142;33628532;33630433;33662366;33663856;33667148;33669020;33669795	-;-;-;-;-;-;-;-;-;-;-;-;-;-;-;-;-;-;-;-;-	5938	0.111224	0.353906	0.287192
Prkcb	7;7;7;7;7;7;7;7;7;7;7;7;7;7;7;7;7;7;7;7;7;7;7;7;7;7;7;7;7;7;7;7;7;7;7;7;7;7;7;7;7;7;7;7;7;7;7;7;7;7;7;7;7;7;7;7;7;7;7;7;7;7;7	122288751;122289297;122289309;122290028;122290513;122290513;122290513;122290513;122416068;122424959;122424959;122424959;122424959;122424959;122457215;122457215;122457215;122457215;122458044;122458044;122458044;122516829;122516829;122516829;122518045;122518045;122518045;122528476;122528476;122528476;122544633;122544633;122544633;122568134;122568134;122568134;122582430;122582430;122582430;122584398…	122289517;122289517;122289517;122290321;122290544;122290544;122290544;122290544;122416201;122425041;122425041;122425041;122425041;122425041;122457326;122457326;122457326;122457326;122458172;122458172;122458172;122516985;122516985;122516985;122518179;122518179;122518179;122528572;122528572;122528572;122544779;122544779;122544779;122568307;122568307;122568307;122582521;122582521;122582521;122584460…	+;+;+;+;+;+;+;+;+;+;+;+;+;+;+;+;+;+;+;+;+;+;+;+;+;+;+;+;+;+;+;+;+;+;+;+;+;+;+;+;+;+;+;+;+;+;+;+;+;+;+;+;+;+;+;+;+;+;+;+;+;+;+	7651	0.0863219	0.476631	0.204317
Prr18	17;17;17;17	8340406;8340739;8341007;8341007	8340706;8340883;8344112;8344112	+;+;+;+	3552	0.247916	1.25288	0.680153
Psmb10	8;8;8;8;8;8;8;8;8;8;8;8;8;8;8;8;8;8;8;8;8;8;8;8;8;8;8;8;8;8;8;8;8;8	105935735;105935736;105935739;105935744;105935800;105935996;105935996;105935996;105935996;105935996;105936014;105936660;105936696;105936696;105936696;105936696;105936696;105936696;105936866;105936866;105936866;105936866;105936982;105937241;105937241;105937241;105937241;105937494;105937679;105937679;105937679;105937955;105937955;105937955	105935905;105935905;105935905;105935905;105935905;105936147;105936147;105936147;105936147;105936147;105936147;105936754;105936754;105937027;105936981;105936754;105936754;105936754;105936981;105936981;105937038;105936981;105937025;105937591;105937591;105937665;105937381;105937591;105937766;105937766;105937766;105938092;105938104;105938444	-;-;-;-;-;-;-;-;-;-;-;-;-;-;-;-;-;-;-;-;-;-;-;-;-;-;-;-;-;-;-;-;-;-	1705	2.5824	9.3891	5.29274
Psmb8	17;17;17;17;17;17;17;17;17;17;17;17;17;17;17;17	34197721;34197790;34198370;34198609;34199233;34199233;34199571;34199571;34199571;34200141;34200141;34200141;34200711;34200711;34201178;34201178	34197761;34198545;34198545;34199380;34199380;34199380;34199682;34199682;34199682;34200270;34200915;34200270;34200915;34200918;34201425;34201454	+;+;+;+;+;+;+;+;+;+;+;+;+;+;+;+	2736	3.82204	12.9746	7.84317
Psmb9	17;17;17;17;17;17;17;17;17;17;17;17;17;17;17;17;17;17;17	34181988;34182030;34182033;34182036;34183089;34183089;34183089;34183615;34183615;34183615;34184030;34184282;34184282;34185730;34185730;34185730;34186891;34187058;34187250	34182351;34182351;34182351;34182351;34183230;34183230;34183549;34184413;34183731;34183744;34184413;34184413;34184413;34185797;34187353;34185797;34187219;34187338;34187764	-;-;-;-;-;-;-;-;-;-;-;-;-;-;-;-;-;-;-	3659	0.481333	1.53719	0.990395
Ptger3	3;3;3;3;3;3;3;3;3	157566892;157566900;157566900;157604965;157604965;157604965;157641721;157643875;157643875	157567845;157567845;157567845;157607595;157605144;157605144;157641809;157644756;157645888	+;+;+;+;+;+;+;+;+	5688	0.064507	0.249929	0.27483
Ptgr1	4;4;4;4;4;4;4;4;4;4	58965439;58968759;58970991;58973535;58975861;58978014;58981827;58982880;58984744;58987038	58966763;58968877;58971099;58973690;58975978;58978181;58981883;58982925;58984859;58987119	-;-;-;-;-;-;-;-;-;-	2296	0.511381	1.53445	6.5764
Ptgs1	2;2;2;2;2;2;2;2;2;2;2;2;2;2;2;2;2;2;2;2;2;2;2;2;2;2;2;2;2	36230426;36230556;36230668;36236249;36237207;36237207;36237207;36237651;36237651;36237651;36237957;36237957;36237957;36240596;36240596;36240713;36240871;36240871;36240871;36242475;36242763;36242763;36245044;36245044;36245044;36249096;36249096;36250996;36250996	36230569;36230763;36230763;36236365;36237323;36237323;36237323;36237791;36237791;36237791;36238100;36238063;36238100;36240777;36240777;36240777;36241468;36240954;36240954;36243009;36243009;36243009;36245205;36245330;36245330;36249243;36249243;36252269;36252272	+;+;+;+;+;+;+;+;+;+;+;+;+;+;+;+;+;+;+;+;+;+;+;+;+;+;+;+;+	3884	0.755749	3.24638	2.32341
Ptprc	1;1;1;1;1;1;1;1;1;1;1;1;1;1;1;1;1;1;1;1;1;1;1;1;1;1;1;1;1;1;1;1;1;1;1;1;1;1;1;1;1;1;1;1;1;1;1;1;1;1;1;1;1;1;1;1;1;1;1;1;1;1;1;1;1;1;1;1;1;1;1;1;1;1;1;1;1;1;1;1;1;1;1;1;1;1;1;1;1;1;1;1;1;1;1;1;1;1;1;1;1;1;1;1;1;1;1;1;1;1;1;1;1;1;1;1;1;1;1;1;1;1;1;1;1;1;1;1;1;1;1;1;1;1;1;1;1;1;1;1;1;1;1;1;1;1;1	138062861;138063407;138063413;138063420;138066088;138066088;138066088;138066088;138067886;138067886;138067886;138067886;138068312;138068312;138068312;138068312;138071137;138071137;138071137;138071137;138072257;138072257;138072257;138072257;138073604;138073604;138073604;138073604;138078446;138078446;138078446;138078446;138080135;138080135;138080135;138080135;138080837;138080837;138080837;138080837…	138064778;138064778;138064778;138064778;138066223;138066223;138066223;138066223;138068061;138068061;138068061;138068061;138068434;138068434;138068434;138068434;138071271;138071271;138071271;138071271;138072390;138072390;138072390;138072390;138073694;138073694;138073694;138073694;138078595;138078595;138078595;138078595;138080270;138080270;138080270;138080270;138080994;138080994;138080994;138080994…	-;-;-;-;-;-;-;-;-;-;-;-;-;-;-;-;-;-;-;-;-;-;-;-;-;-;-;-;-;-;-;-;-;-;-;-;-;-;-;-;-;-;-;-;-;-;-;-;-;-;-;-;-;-;-;-;-;-;-;-;-;-;-;-;-;-;-;-;-;-;-;-;-;-;-;-;-;-;-;-;-;-;-;-;-;-;-;-;-;-;-;-;-;-;-;-;-;-;-;-;-;-;-;-;-;-;-;-;-;-;-;-;-;-;-;-;-;-;-;-;-;-;-;-;-;-;-;-;-;-;-;-;-;-;-;-;-;-;-;-;-;-;-;-;-;-;-	18313	0.344616	1.3433	0.90406
RP23-42N8.2	9	43217122	43217555	+	434	5.83346	27.7711	25.7865
RP23-462D5.5	7	110119990	110121740	+	1751	0.0838186	2.12959	1.70437
RP23-98C9.5	8	94170748	94173412	-	2665	5.3695	21.8939	19.9437
RP24-122D14.3	8;8;8;8;8;8;8	129263641;129263648;129267485;129268394;129281023;129281337;129281983	129263724;129263724;129267699;129271868;129281149;129281397;129282844	+;+;+;+;+;+;+	4824	0.0912727	0.35235	0.265134
RP24-236E2.1	10	50422134	50422808	-	675	0.190253	7.86846	3.30542
RP24-63K13.5	9;9;9;9	31947018;31948353;31994938;32005294	31947324;31948475;31995074;32005460	-;-;-;-	734	0.799817	2.39992	2.71058
Rab39	9;9	53684110;53705889	53686736;53706232	-;-	2971	0.0987994	0.769746	0.430498
Ralgds	2;2;2;2;2;2;2;2;2;2;2;2;2;2;2;2;2;2;2;2;2;2;2;2;2;2;2;2;2;2;2;2;2;2;2;2;2;2;2;2;2;2;2;2;2;2;2;2;2;2;2;2;2;2;2;2;2;2;2;2;2;2;2;2;2;2;2;2;2;2;2;2;2;2;2;2;2;2;2;2;2;2;2;2;2;2;2;2;2;2;2;2	28513125;28513326;28533355;28533542;28533549;28540711;28540711;28540711;28540711;28540711;28540726;28542290;28542290;28542290;28542290;28542290;28542290;28542333;28542855;28542855;28542891;28542891;28542891;28542891;28543554;28543554;28543554;28543554;28543639;28543989;28543989;28543989;28543989;28543989;28545010;28545010;28545010;28545010;28545010;28545293;28545415;28545415;28545415;28545415;285…	28513560;28513560;28533733;28533733;28533733;28540821;28540821;28540821;28540821;28540821;28540820;28542902;28542483;28542483;28542483;28542483;28542483;28542483;28542950;28542950;28542950;28542950;28542950;28542950;28543747;28543747;28543747;28543747;28543747;28544386;28544386;28544386;28544386;28544386;28545076;28545225;28545225;28545225;28545225;28545945;28545518;28545518;28545518;28545518;285…	+;+;+;+;+;+;+;+;+;+;+;+;+;+;+;+;+;+;+;+;+;+;+;+;+;+;+;+;+;+;+;+;+;+;+;+;+;+;+;+;+;+;+;+;+;+;+;+;+;+;+;+;+;+;+;+;+;+;+;+;+;+;+;+;+;+;+;+;+;+;+;+;+;+;+;+;+;+;+;+;+;+;+;+;+;+;+;+;+;+;+;+	6159	0.119148	0.331171	0.334571
Rap2b	3	61361638	61368430	+	6793	0.280872	0.655118	0.706062
Rapgef5	12;12;12;12;12;12;12;12;12;12;12;12;12;12;12;12;12;12;12;12;12;12;12;12;12;12;12;12	117516479;117518010;117527136;117575555;117577621;117581694;117584043;117595241;117613381;117647044;117658278;117688564;117689148;117709269;117714105;117715307;117718202;117719119;117721242;117725951;117728657;117730540;117739627;117742851;117744173;117748386;117753422;117755963	117516903;117518136;117527249;117575605;117577727;117581815;117584211;117595307;117613429;117647117;117658403;117688682;117689236;117709347;117714249;117715404;117718232;117719197;117721391;117726048;117728779;117730718;117739717;117742901;117744260;117748450;117753476;117756978	+;+;+;+;+;+;+;+;+;+;+;+;+;+;+;+;+;+;+;+;+;+;+;+;+;+;+;+	3987	0.506155	1.56575	1.17625
Raph1	1;1;1;1;1;1;1;1;1;1;1;1;1;1;1;1;1;1;1;1;1;1;1;1;1;1;1;1;1;1;1;1;1;1;1;1;1;1;1;1;1;1;1;1;1;1;1;1;1;1;1;1;1;1;1;1;1;1;1;1;1	60482292;60483185;60483236;60490676;60493323;60493538;60493538;60493538;60493538;60495415;60495415;60495415;60495415;60495415;60496225;60496225;60496225;60496225;60496225;60498424;60498424;60498424;60498424;60499480;60499480;60499480;60499480;60500555;60500555;60500555;60501603;60501756;60501756;60501756;60502825;60502825;60502825;60503518;60503518;60503518;60510417;60510417;60513809;60518980;605…	60490321;60483340;60483340;60490944;60493680;60493680;60493680;60493680;60493680;60495535;60495535;60495535;60495535;60495535;60496281;60496323;60496323;60496323;60496323;60498534;60498534;60498534;60498534;60499623;60499623;60499550;60499623;60500620;60500620;60500620;60503265;60501877;60501877;60501877;60502984;60502984;60502984;60503595;60503595;60503595;60510491;60510491;60522291;60519060;605…	-;-;-;-;-;-;-;-;-;-;-;-;-;-;-;-;-;-;-;-;-;-;-;-;-;-;-;-;-;-;-;-;-;-;-;-;-;-;-;-;-;-;-;-;-;-;-;-;-;-;-;-;-;-;-;-;-;-;-;-;-	20498	6.1988	14.154	14.6043
Rassf4	6;6;6;6;6;6;6;6;6;6;6;6;6;6;6;6;6;6;6;6;6;6;6;6;6;6;6;6;6;6;6;6;6;6;6;6;6;6;6;6;6;6;6	116633008;116639224;116639441;116639488;116640233;116640233;116640233;116640873;116641428;116641428;116641685;116641685;116642925;116645096;116645096;116645238;116645886;116645886;116645886;116645886;116645903;116645974;116647567;116647567;116647567;116647567;116647567;116647567;116659525;116659525;116659525;116659525;116659525;116661839;116661843;116661843;116661843;116661855;116673724;116673724…	116638298;116639538;116639538;116639538;116640354;116640354;116640354;116641002;116641479;116641479;116641786;116641786;116645256;116645256;116645256;116645256;116645977;116645977;116645977;116645977;116645977;116645977;116647709;116647709;116647936;116647709;116647709;116647709;116659595;116659595;116659600;116659600;116659600;116661936;116661936;116661936;116661936;116661936;116673798;116673771…	-;-;-;-;-;-;-;-;-;-;-;-;-;-;-;-;-;-;-;-;-;-;-;-;-;-;-;-;-;-;-;-;-;-;-;-;-;-;-;-;-;-;-	9209	0.685303	1.64438	1.5972
Rgn	X;X;X;X;X;X;X	20549787;20550363;20552320;20557512;20559355;20559977;20561435	20549873;20550541;20552502;20557727;20559486;20560131;20562089	+;+;+;+;+;+;+	1607	449.752	1226.77	941.083
Rgs1	1;1;1;1;1;1;1;1;1;1;1;1;1;1;1;1;1;1;1;1;1;1;1;1;1;1;1;1;1;1	144242296;144243213;144243972;144244595;144244673;144244673;144245463;144246190;144246190;144246190;144246190;144246190;144247792;144247795;144247906;144247906;144247906;144247906;144247906;144247906;144248479;144248479;144248479;144248479;144248901;144248901;144248901;144248901;144248901;144248901	144245487;144249055;144245487;144245487;144246353;144245487;144245487;144246353;144246353;144246353;144246353;144246353;144247967;144247967;144247967;144247967;144249027;144248559;144247967;144247967;144248559;144248608;144249059;144248559;144249058;144249057;144249060;144249057;144249059;144249242	-;-;-;-;-;-;-;-;-;-;-;-;-;-;-;-;-;-;-;-;-;-;-;-;-;-;-;-;-;-	6947	0.190139	0.791847	0.66484
Rgs16	1;1;1;1;1	153740349;153740863;153741620;153741963;153743634	153740512;153740973;153741681;153742129;153745468	+;+;+;+;+	2339	16.6595	56.5235	89.5111
Rgs2	1;1;1;1;1;1;1;1;1;1;1;1;1;1;1	143999338;144001680;144001883;144002116;144002116;144002517;144002780;144002780;144002780;144002952;144002952;144004009;144004009;144004009;144004009	144001874;144001874;144002282;144002282;144002282;144003053;144002841;144002841;144003053;144003053;144003053;144004032;144004135;144004121;144004161	-;-;-;-;-;-;-;-;-;-;-;-;-;-;-	3627	0.222557	0.792417	0.548544
Rnd2	11;11;11;11;11;11;11;11;11;11;11;11;11;11;11;11	101464999;101465484;101465631;101468175;101468933;101468933;101468933;101470013;101470013;101470013;101470718;101470718;101470718;101471058;101471058;101471058	101465144;101465933;101465933;101468439;101469020;101469020;101469020;101470122;101470122;101470122;101470852;101470852;101470852;101471853;101471853;101471105	+;+;+;+;+;+;+;+;+;+;+;+;+;+;+;+	1990	2.28631	5.5286	5.44525
Rnf145	11;11;11;11;11;11;11;11;11;11;11;11;11;11;11;11;11;11;11;11;11;11;11;11;11;11;11;11	44518964;44518983;44519442;44520305;44524303;44524928;44524928;44524928;44531276;44531276;44531276;44542629;44542629;44542629;44548764;44548764;44548764;44551644;44551644;44555138;44556831;44557256;44559972;44559972;44560019;44561465;44561465;44563920	44519274;44519274;44519668;44520498;44524358;44525143;44525143;44525143;44531384;44531384;44531384;44542720;44542720;44542720;44548925;44548999;44548999;44554977;44551819;44555278;44557438;44557438;44560037;44560119;44560119;44561977;44561821;44565520	+;+;+;+;+;+;+;+;+;+;+;+;+;+;+;+;+;+;+;+;+;+;+;+;+;+;+;+	7786	2.90291	9.31574	6.99518
Rpl26	11;11;11;11;11;11;11;11;11;11;11;11;11;11;11;11;11;11;11	68901583;68901610;68901627;68901635;68902270;68902270;68902270;68902270;68902853;68903179;68903179;68903179;68903179;68903234;68904365;68904365;68904365;68904365;68906586	68901624;68901812;68901812;68901757;68902442;68902436;68902442;68902442;68903319;68903319;68903319;68903319;68903319;68903319;68904533;68904533;68904510;68904534;68906989	+;+;+;+;+;+;+;+;+;+;+;+;+;+;+;+;+;+;+	1444	4.26019	24.1272	8.72601
Rps26-ps1	8;8	107439131;107439214	107439579;107439564	-;-	449	2.04296	19.502	19.5444
Runx1	16;16;16;16;16;16;16;16;16;16;16;16;16;16;16;16;16;16;16;16;16;16;16;16;16;16;16;16;16;16	92601466;92603656;92605398;92613599;92613599;92613599;92644154;92644154;92668708;92668708;92668708;92686956;92686989;92688976;92688976;92688976;92688976;92695484;92695484;92695484;92695484;92695484;92695592;92695909;92815428;92825589;92825589;92825589;92825934;92825934	92606124;92606124;92606124;92613760;92613760;92613760;92644345;92644345;92668812;92668812;92668812;92687304;92689132;92689132;92689132;92689132;92689132;92695737;92695495;92697328;92696125;92695737;92695737;92697325;92817708;92825704;92825778;92825704;92826074;92826149	-;-;-;-;-;-;-;-;-;-;-;-;-;-;-;-;-;-;-;-;-;-;-;-;-;-;-;-;-;-	11827	0.0372283	0.185525	0.192254
Saa1	7;7;7;7;7	46740497;46740497;46741256;46742432;46742949	46742942;46740842;46741394;46742523;46742980	-;-;-;-;-	2478	2.26546	102.116	21.0186
Saa2	7;7;7;7;7;7;7;7;7;7;7;7	46751790;46751833;46751833;46751871;46752287;46752290;46753418;46753418;46753418;46753971;46753971;46753971	46751864;46751864;46751864;46754313;46752381;46752381;46753556;46753556;46753556;46754313;46754313;46754310	+;+;+;+;+;+;+;+;+;+;+;+	2518	1.31146	149.133	11.3441
Saa3	7;7;7;7;7;7;7;7;7	46711998;46711999;46712589;46712589;46712959;46713661;46715010;46715647;46715647	46712264;46712264;46712727;46712727;46715104;46713749;46715104;46715700;46715700	-;-;-;-;-;-;-;-;-	2606	1.60508	18.4999	3.59915
Sall1	8;8;8;8	89027235;89029944;89042352;89044030	89028818;89033398;89042444;89044162	-;-;-;-	5265	4.28591	8.73127	9.13674
Samd9l	6;6;6;6	3372257;3376950;3384910;3399268	3377281;3377281;3385006;3399572	-;-;-;-	5427	0.527353	2.30059	1.17838
Samhd1	2;2;2;2;2;2;2;2;2;2;2;2;2;2;2;2;2;2;2;2;2;2;2;2;2;2;2;2;2;2;2;2;2;2;2;2;2;2;2;2;2;2;2;2;2;2;2;2;2;2;2;2;2;2;2;2;2;2;2;2;2;2;2;2;2;2;2;2;2;2;2;2;2;2;2;2;2;2;2;2;2;2;2;2;2;2;2;2;2;2;2;2;2;2;2;2;2;2;2	157097533;157099401;157099401;157101321;157101360;157101694;157101721;157101721;157101721;157101721;157103345;157104832;157104832;157104832;157104832;157104832;157106231;157106231;157106231;157106231;157106231;157106231;157107429;157107429;157107429;157107429;157107429;157107429;157107512;157109124;157109417;157109417;157109417;157109417;157109417;157109417;157109417;157110548;157110548;157110548…	157099503;157099503;157101443;157101443;157101443;157101858;157101858;157101858;157101858;157101858;157104936;157104936;157104936;157104936;157104936;157104936;157106323;157106323;157106323;157106323;157106323;157106323;157107565;157107565;157107565;157107565;157107565;157107565;157107565;157109532;157110040;157109532;157109532;157109532;157109532;157109532;157109532;157110611;157110639;157110612…	-;-;-;-;-;-;-;-;-;-;-;-;-;-;-;-;-;-;-;-;-;-;-;-;-;-;-;-;-;-;-;-;-;-;-;-;-;-;-;-;-;-;-;-;-;-;-;-;-;-;-;-;-;-;-;-;-;-;-;-;-;-;-;-;-;-;-;-;-;-;-;-;-;-;-;-;-;-;-;-;-;-;-;-;-;-;-;-;-;-;-;-;-;-;-;-;-;-;-	9150	1.86867	4.26243	3.80519
Sbk1	7;7;7;7;7;7;7;7	126272619;126273400;126289857;126289857;126291043;126291080;126291825;126292320	126273099;126273517;126290089;126289931;126291245;126291152;126295016;126292820	+;+;+;+;+;+;+;+	4227	1.87494	3.97727	5.54731
Scd1	19;19;19;19;19;19	44394451;44400142;44401693;44403165;44406487;44407386	44398118;44400374;44401898;44403295;44406760;44407709	-;-;-;-;-;-	4836	170.048	2268.19	2023.08
Sdc3	4;4;4;4;4;4;4;4;4;4;4;4;4;4;4;4	130792537;130792704;130811938;130814304;130816845;130816845;130816845;130816845;130816845;130818582;130818582;130818582;130818582;130821368;130821368;130822643	130792802;130792802;130811985;130814366;130816962;130817273;130816962;130816962;130816962;130819059;130819059;130819204;130819204;130822250;130821656;130826319	+;+;+;+;+;+;+;+;+;+;+;+;+;+;+;+	5989	2.0585	11.4246	5.52289
Selplg	5;5;5;5;5;5;5;5;5;5;5	113818536;113818547;113818555;113818555;113819164;113819184;113819197;113820106;113828159;113830349;113832429	113818846;113820248;113818846;113818846;113819257;113819566;113819317;113820248;113830472;113830501;113832644	-;-;-;-;-;-;-;-;-;-;-	4272	0.0515332	0.728189	0.299393
Serpina3a	12;12;12;12;12;12;12;12;12;12;12;12;12	104112724;104112780;104115953;104115970;104118421;104118421;104118421;104119635;104119635;104119635;104121318;104121318;104121318	104112923;104112923;104116612;104116612;104118694;104118694;104118694;104119785;104119785;104119785;104121808;104121518;104121896	+;+;+;+;+;+;+;+;+;+;+;+;+	1864	0.135822	1.5419	0.724283
Serpina3g	12;12;12;12;12;12;12;12;12;12;12;12;12;12;12	104236245;104236252;104236259;104236260;104237195;104237195;104237195;104237735;104237878;104237938;104237938;104239035;104239035;104240247;104241036	104236318;104236318;104236318;104236318;104237286;104237286;104237286;104238323;104238259;104238344;104238344;104239305;104239308;104240397;104241939	+;+;+;+;+;+;+;+;+;+;+;+;+;+;+	2105	0.627505	2.16051	1.93758
Serpina3h	12;12;12;12;12;12;12;12	104247905;104250140;104250152;104251472;104251472;104252685;104252685;104253475	104247972;104250757;104250757;104251745;104251745;104252963;104252835;104253669	+;+;+;+;+;+;+;+	1434	0.857161	2.49648	2.7808
Serpina3i	12;12;12;12;12;12;12;12	104263122;104263157;104264302;104265094;104265094;104266445;104267656;104268444	104263214;104263214;104264435;104265712;104265736;104266718;104267806;104269372	+;+;+;+;+;+;+;+	2224	0.41575	1.32371	1.03165
Serpina7	X;X;X;X;X;X;X;X;X;X;X;X;X;X	139079257;139079257;139081207;139081207;139081950;139081950;139083071;139083071;139083486;139083805;139083805;139085188;139085188;139085188	139080488;139080488;139081354;139081354;139082223;139082223;139083187;139083718;139083718;139083901;139083898;139085236;139085217;139085215	-;-;-;-;-;-;-;-;-;-;-;-;-;-	2448	10.4919	24.1124	45.542
Serpinb9	13;13;13;13;13;13;13;13;13;13;13;13;13;13;13	33003250;33004541;33004563;33006533;33006533;33008006;33008006;33008768;33008768;33010687;33010687;33013862;33013862;33015447;33015447	33003344;33004695;33004695;33006710;33006710;33008143;33008143;33008885;33008885;33010829;33010829;33014017;33014017;33017955;33017957	+;+;+;+;+;+;+;+;+;+;+;+;+;+;+	3494	0.693087	1.5744	1.52524
Sfrp1	8;8;8	23411502;23417330;23446166	23412328;23417407;23449632	+;+;+	4372	0.0839241	0.53722	0.292545
Sftpa1	14;14;14;14;14;14;14;14;14;14;14	41131782;41131788;41132216;41132435;41132435;41132822;41132822;41133638;41133638;41134070;41134070	41131832;41131832;41132248;41132629;41132629;41132941;41132941;41133715;41133715;41134476;41136452	+;+;+;+;+;+;+;+;+;+;+	2860	2.4119	8.12588	8.78262
Sh2d4a	8;8;8;8;8;8;8;8;8;8;8;8;8;8;8;8;8	68276567;68282033;68282307;68294303;68294303;68296654;68296654;68329252;68329252;68331035;68331035;68335065;68335065;68345953;68345953;68346654;68347197	68276872;68282411;68282411;68294459;68294459;68296825;68296825;68329360;68329360;68331236;68331236;68335195;68335195;68346173;68346173;68347694;68347699	+;+;+;+;+;+;+;+;+;+;+;+;+;+;+;+;+	2723	0.45814	2.11098	1.13069
Sh3yl1	12;12;12;12;12;12;12;12;12;12;12;12;12;12;12;12;12;12;12;12;12;12;12;12;12;12;12;12;12;12;12;12;12;12;12;12;12;12;12	30911668;30911668;30911692;30912187;30912957;30922235;30922235;30922235;30922235;30924764;30924764;30924764;30926810;30926810;30926810;30926810;30939574;30939574;30939574;30939574;30940291;30940291;30940291;30940291;30941967;30941967;30941967;30941967;30942790;30942790;30942790;30958848;30958848;30958848;30958848;30959804;30959804;30959804;30959804	30912227;30912227;30912227;30912227;30913101;30922345;30922345;30922345;30922345;30924877;30924877;30924877;30926874;30926874;30926874;30926874;30939686;30939686;30939686;30939686;30940419;30940419;30940419;30940419;30942129;30942129;30942129;30942868;30942868;30942868;30942868;30958904;30958904;30958904;30958904;30960156;30960151;30960162;30960018	+;+;+;+;+;+;+;+;+;+;+;+;+;+;+;+;+;+;+;+;+;+;+;+;+;+;+;+;+;+;+;+;+;+;+;+;+;+;+	2555	1.12014	3.19324	2.50295
Siglec1	2;2;2;2;2;2;2;2;2;2;2;2;2;2;2;2;2;2;2;2;2;2;2;2;2;2;2;2;2;2;2;2;2;2;2;2;2;2;2;2;2;2	131069220;131070339;131070739;131071089;131072054;131072592;131073328;131073328;131073905;131073905;131074245;131074245;131074820;131074820;131075694;131075694;131076113;131076113;131077921;131077921;131078497;131078497;131079122;131079122;131080347;131080347;131081275;131081275;131083291;131083291;131083573;131083791;131083791;131084915;131084915;131084915;131085458;131085458;131085458;131086050…	131069875;131070411;131070841;131071391;131072852;131072852;131073633;131073633;131074156;131074156;131074514;131074514;131075071;131075071;131076005;131076005;131076373;131076373;131078223;131078223;131078754;131078754;131079442;131079442;131080604;131080604;131081574;131081574;131083545;131083545;131084057;131084057;131084057;131085214;131085214;131085214;131085817;131085817;131085817;131086765…	-;-;-;-;-;-;-;-;-;-;-;-;-;-;-;-;-;-;-;-;-;-;-;-;-;-;-;-;-;-;-;-;-;-;-;-;-;-;-;-;-;-	7143	0.154102	2.0075	0.606806
Siglece	7;7;7;7;7;7;7;7;7;7;7;7	43651070;43651541;43656092;43656526;43656526;43657538;43657538;43658973;43658973;43659210;43659210;43659694	43651689;43651689;43656173;43656619;43656619;43657795;43657795;43659020;43659020;43659353;43659488;43660161	-;-;-;-;-;-;-;-;-;-;-;-	1849	0.119064	1.53769	0.614871
Sla	15;15;15;15;15;15;15;15;15;15;15;15;15;15;15;15;15;15;15;15;15;15;15;15;15;15;15;15;15;15;15;15;15;15;15;15	66780819;66780864;66782078;66782542;66783609;66783609;66783609;66783609;66785720;66787037;66787037;66787037;66787037;66789682;66789682;66789682;66789682;66792225;66792225;66792225;66792225;66792225;66793681;66793681;66793681;66793681;66793681;66801431;66801431;66801431;66801431;66801431;66812529;66812529;66831570;66831570	66782755;66782755;66782755;66782755;66783756;66783756;66783756;66783756;66789785;66787168;66787168;66787168;66787168;66789785;66789785;66789785;66789785;66792311;66792311;66792311;66792311;66792311;66793780;66793780;66793780;66793780;66793780;66801528;66803749;66801593;66801528;66801528;66812593;66812797;66831829;66831646	-;-;-;-;-;-;-;-;-;-;-;-;-;-;-;-;-;-;-;-;-;-;-;-;-;-;-;-;-;-;-;-;-;-;-;-	9186	0.11184	0.767056	0.262999
Slc10a2	8;8;8;8;8;8	5083219;5089024;5091622;5093261;5098448;5104807	5086283;5089181;5091797;5093349;5098566;5105351	-;-;-;-;-;-	4152	2.27697	8.60184	5.85579
Slc11a1	1;1;1;1;1;1;1;1;1;1;1;1;1;1;1;1;1;1;1;1;1;1;1;1;1;1;1;1;1;1;1;1;1;1;1;1;1;1;1;1;1;1;1;1;1;1;1;1;1;1;1;1;1;1;1;1;1;1;1;1;1;1;1;1;1;1;1;1;1;1;1;1;1;1;1;1;1;1;1;1;1;1	74375195;74375203;74375203;74375225;74375253;74375572;74375602;74375718;74375718;74375718;74375770;74376657;74376793;74376793;74376793;74376793;74376793;74377157;74377157;74377157;74377157;74377157;74377157;74379783;74379783;74379783;74379783;74379783;74379783;74380197;74380197;74380197;74380197;74380609;74380609;74380609;74380609;74380609;74380842;74380842;74380842;74380842;74380842;74381651;743…	74375321;74375321;74375321;74375321;74375321;74375851;74375851;74375851;74375851;74375851;74375851;74376793;74376890;74376915;74376915;74376915;74376915;74377276;74377276;74377276;74377276;74377276;74377276;74379856;74379889;74380267;74379889;74379889;74379889;74380267;74380267;74380267;74380267;74380676;74380676;74380676;74380676;74380676;74380997;74380997;74380997;74380997;74380997;74381894;743…	+;+;+;+;+;+;+;+;+;+;+;+;+;+;+;+;+;+;+;+;+;+;+;+;+;+;+;+;+;+;+;+;+;+;+;+;+;+;+;+;+;+;+;+;+;+;+;+;+;+;+;+;+;+;+;+;+;+;+;+;+;+;+;+;+;+;+;+;+;+;+;+;+;+;+;+;+;+;+;+;+;+	3705	0.396131	0.984266	0.824672
Slc15a2	16;16;16;16;16;16;16;16;16;16;16;16;16;16;16;16;16;16;16;16;16;16;16;16;16;16;16;16;16;16;16;16;16;16;16;16;16;16;16;16;16;16;16;16;16;16;16;16;16;16;16;16;16;16;16;16;16;16;16;16;16;16;16;16;16;16;16;16;16;16;16;16;16;16;16;16;16;16;16;16;16;16;16;16;16;16;16;16;16;16;16;16;16;16;16;16;16;16;16;16;16;16;16;16;16	36750178;36751778;36751778;36752272;36752272;36752272;36752316;36752993;36752993;36752993;36752993;36753696;36753696;36753696;36753696;36754442;36754442;36754442;36754442;36754458;36754809;36755898;36756050;36756050;36756050;36756225;36756225;36756225;36756225;36757122;36757122;36757122;36757122;36757169;36757780;36757780;36757780;36757780;36757780;36759226;36759226;36759226;36759226;36760071;367…	36751954;36751954;36751954;36752376;36752376;36752376;36752376;36753139;36753139;36753139;36753139;36753792;36753792;36753792;36753792;36754758;36754552;36754552;36754552;36754552;36755407;36756096;36756096;36756096;36756096;36756704;36756389;36756389;36756389;36757256;36757256;36757256;36757256;36757256;36757861;36757861;36757861;36757861;36757861;36759314;36759314;36759314;36759314;36760103;367…	-;-;-;-;-;-;-;-;-;-;-;-;-;-;-;-;-;-;-;-;-;-;-;-;-;-;-;-;-;-;-;-;-;-;-;-;-;-;-;-;-;-;-;-;-;-;-;-;-;-;-;-;-;-;-;-;-;-;-;-;-;-;-;-;-;-;-;-;-;-;-;-;-;-;-;-;-;-;-;-;-;-;-;-;-;-;-;-;-;-;-;-;-;-;-;-;-;-;-;-;-;-;-;-;-	7360	0.0398822	1.44444	0.395828
Slc15a3	19;19;19;19;19;19;19;19;19;19;19;19;19;19;19;19;19;19	10839727;10842544;10842550;10842895;10843206;10843206;10848505;10848505;10853129;10853129;10854254;10854254;10854909;10854909;10855888;10855888;10857183;10857630	10839998;10843578;10842644;10843578;10843471;10843347;10848788;10848788;10853276;10853276;10854361;10854361;10855077;10855077;10859362;10856046;10857338;10857915	+;+;+;+;+;+;+;+;+;+;+;+;+;+;+;+;+;+	5491	0.267285	0.934276	0.56938
Slc22a26	19;19;19;19;19;19;19;19;19;19;19;19;19;19;19;19;19;19;19;19	7781041;7781980;7782782;7782782;7785180;7785180;7786382;7786382;7788212;7788212;7790086;7790086;7790762;7790762;7791030;7791030;7796152;7796152;7802048;7802048	7782170;7782170;7782985;7782985;7785288;7785288;7786596;7786596;7788327;7788327;7790209;7790212;7790930;7790924;7791184;7791184;7796255;7796255;7802667;7802578	-;-;-;-;-;-;-;-;-;-;-;-;-;-;-;-;-;-;-;-	2949	0.124421	4.44334	1.59027
Slc22a27	19;19;19;19;19;19;19;19;19;19;19;19;19;19;19;19;19;19;19;19	7864388;7864388;7865742;7865742;7866883;7866883;7879390;7879390;7880164;7880164;7896758;7896758;7909693;7909951;7925858;7925858;7926369;7926369;7965962;7965962	7864837;7864837;7865945;7865945;7866991;7866991;7879604;7879604;7880279;7880279;7896878;7896878;7909861;7910105;7925961;7925961;7926811;7926811;7966027;7966000	-;-;-;-;-;-;-;-;-;-;-;-;-;-;-;-;-;-;-;-	2152	0.0341	1.78073	1.35376
Slc26a10	10;10;10;10;10;10;10;10;10;10;10;10;10;10;10;10;10;10	127172426;127173275;127173482;127173624;127173805;127173909;127174099;127174284;127174806;127174985;127176572;127176807;127177087;127177938;127178343;127178729;127179625;127180231	127172576;127173381;127173536;127173706;127173808;127174025;127174168;127174390;127174901;127175062;127176685;127176954;127177169;127178090;127178507;127178886;127179735;127180645	-;-;-;-;-;-;-;-;-;-;-;-;-;-;-;-;-;-	2215	0.298171	1.03247	1.05862
Slc27a3	3;3;3;3;3;3;3;3;3;3;3;3;3;3;3;3;3;3;3;3;3;3;3;3;3;3;3;3;3;3;3;3;3;3	90385239;90385239;90385241;90386250;90386250;90386250;90386480;90386480;90386480;90386748;90386748;90386748;90387064;90387064;90387255;90387255;90387435;90387636;90387636;90387636;90387636;90388328;90388328;90388328;90388328;90388363;90388690;90388690;90388690;90388690;90389172;90389172;90389172;90389172	90385533;90385533;90385533;90386380;90386380;90386380;90386577;90386577;90386577;90386946;90387449;90386946;90387154;90387154;90387449;90387449;90387449;90387760;90387760;90387760;90387760;90388486;90388486;90388486;90388486;90388486;90388981;90388921;90388899;90388899;90389664;90389630;90389938;90389927	-;-;-;-;-;-;-;-;-;-;-;-;-;-;-;-;-;-;-;-;-;-;-;-;-;-;-;-;-;-;-;-;-;-	2569	0.371344	1.03455	0.940407
Slc38a1	15;15;15;15;15;15;15;15;15;15;15;15;15;15;15;15;15;15;15;15;15;15;15;15;15;15;15;15;15;15;15;15;15;15;15;15;15;15;15;15;15;15;15;15;15;15;15;15	96571418;96571418;96571418;96578530;96578530;96578530;96578721;96578721;96578721;96579315;96579315;96579315;96584344;96584344;96584344;96585550;96585550;96585550;96586862;96586862;96586862;96587092;96587092;96587092;96588928;96588928;96588928;96590060;96590060;96590060;96590420;96590420;96590420;96592507;96592507;96592507;96609856;96609856;96609856;96616142;96616142;96616142;96623956;96623956;966…	96576812;96576812;96576812;96578627;96578627;96578627;96578862;96578862;96578862;96579433;96579433;96579433;96584444;96584444;96584444;96585629;96585629;96585629;96586972;96586972;96586972;96587150;96587150;96587150;96589010;96589010;96589010;96590141;96590141;96590141;96590512;96590512;96590512;96592580;96592580;96592580;96609971;96609971;96609971;96616217;96616217;96616217;96624169;96624169;966…	-;-;-;-;-;-;-;-;-;-;-;-;-;-;-;-;-;-;-;-;-;-;-;-;-;-;-;-;-;-;-;-;-;-;-;-;-;-;-;-;-;-;-;-;-;-;-;-	8391	0.0174909	0.257812	0.186299
Slc44a3	3;3;3;3;3;3;3;3;3;3;3;3;3;3;3;3;3;3;3;3;3	121459528;121459528;121460846;121461102;121463414;121486262;121490198;121497719;121509374;121510192;121512322;121513657;121520151;121524827;121524827;121525667;121525667;121527064;121527064;121531667;121532161	121460076;121460076;121460911;121461338;121463551;121486348;121490354;121497884;121509560;121510316;121512411;121513817;121522521;121524920;121524920;121525803;121525803;121527107;121527206;121531771;121532404	-;-;-;-;-;-;-;-;-;-;-;-;-;-;-;-;-;-;-;-;-	5057	0.725561	2.48114	1.71422
Slc4a8	15;15;15;15;15;15;15;15;15;15;15;15;15;15;15;15;15;15;15;15;15;15;15;15;15;15;15;15;15;15;15;15;15;15;15;15;15;15;15;15;15;15;15;15;15;15;15;15;15;15;15;15;15;15;15;15;15;15;15;15;15;15	100761747;100761869;100761888;100774630;100774630;100774630;100774828;100781254;100782946;100782946;100783787;100783787;100784715;100784715;100787164;100787164;100788160;100788160;100789010;100789010;100789835;100789835;100790906;100790906;100791597;100791597;100795763;100795763;100796505;100796505;100797993;100797993;100799647;100799647;100800480;100800480;100802748;100803235;100803235;100806250…	100761974;100761974;100761974;100774963;100774711;100774711;100775084;100781338;100783095;100783095;100783922;100783922;100784875;100784875;100787352;100787352;100788245;100788245;100789167;100789167;100789922;100789922;100791052;100791052;100791697;100791697;100795937;100795937;100796638;100796638;100798238;100798238;100799752;100799752;100800641;100800641;100803348;100803348;100803348;100806289…	+;+;+;+;+;+;+;+;+;+;+;+;+;+;+;+;+;+;+;+;+;+;+;+;+;+;+;+;+;+;+;+;+;+;+;+;+;+;+;+;+;+;+;+;+;+;+;+;+;+;+;+;+;+;+;+;+;+;+;+;+;+	13021	0.022543	0.0806962	0.120055
Slc7a8	14;14;14;14;14;14;14;14;14;14;14	54722216;54724738;54726735;54729333;54733180;54735054;54735724;54737540;54758439;54759541;54781180	54724251;54724915;54726884;54729429;54733283;54735177;54735877;54737665;54758590;54759745;54781886	-;-;-;-;-;-;-;-;-;-;-	4033	0.363914	1.51724	1.07474
Slc9a9	9;9;9;9;9;9;9;9;9;9;9;9;9;9;9;9;9;9;9;9;9;9;9;9	94669909;94669932;94685055;94685055;94711344;94711344;94712895;94712895;94718412;94809927;94855691;94936310;94939456;94960398;95019105;95020601;95055412;95121686;95122020;95123011;95123011;95137901;95227188;95228838	94670236;94670236;94685257;94685257;94711421;94711421;94712971;94712971;94718846;94810042;94855796;94936448;94939561;94960486;95019218;95020712;95055565;95121934;95122057;95124551;95123062;95137980;95227293;95230445	+;+;+;+;+;+;+;+;+;+;+;+;+;+;+;+;+;+;+;+;+;+;+;+	5679	0.284281	0.990417	0.719444
Slfn9	11;11;11;11;11;11;11;11;11;11;11;11;11;11;11;11	82978390;82980412;82981984;82982154;82982154;82982154;82984557;82984557;82984557;82987239;82987239;82987239;82990942;82990942;82991588;82991588	82981986;82981986;82981986;82982877;82982877;82982877;82984691;82984691;82984691;82988308;82988308;82988308;82991137;82991057;82991829;82991830	-;-;-;-;-;-;-;-;-;-;-;-;-;-;-;-	5965	0.123023	1.60091	0.44075
Snrnp25	11;11;11;11;11;11;11;11;11;11;11;11;11;11;11;11;11;11;11;11;11	32205415;32205446;32205458;32205488;32206762;32206960;32206960;32206960;32206960;32207557;32207557;32207557;32207574;32207574;32208312;32208334;32208334;32208334;32208685;32208685;32208685	32205663;32205663;32205663;32205663;32207050;32207050;32207050;32207043;32207050;32207662;32207662;32207662;32207651;32207662;32208408;32208408;32208408;32208408;32208873;32208984;32208984	+;+;+;+;+;+;+;+;+;+;+;+;+;+;+;+;+;+;+;+;+	1041	0.211479	2.79059	1.36515
Snx10	6;6;6;6;6;6;6;6;6;6;6;6;6;6;6;6;6;6;6;6;6;6;6;6;6;6;6;6;6;6;6;6;6;6;6;6;6;6;6;6;6	51523901;51523982;51524260;51524285;51544523;51544524;51544541;51544566;51562018;51562018;51562018;51562018;51562018;51562018;51562018;51575903;51575903;51575903;51575903;51575903;51575903;51579850;51579850;51579850;51579850;51579850;51580302;51580302;51580302;51580302;51580302;51580302;51588216;51588216;51588216;51588216;51588216;51588881;51588881;51588881;51588881	51524034;51524034;51524381;51524429;51544649;51544752;51544649;51544649;51562064;51562064;51562064;51562064;51562064;51562064;51568476;51575989;51575989;51575989;51575989;51575989;51575989;51579950;51579950;51579950;51579950;51579950;51580400;51580400;51580400;51580377;51580400;51580400;51588428;51588428;51588436;51588428;51588428;51589072;51589043;51590670;51590679	+;+;+;+;+;+;+;+;+;+;+;+;+;+;+;+;+;+;+;+;+;+;+;+;+;+;+;+;+;+;+;+;+;+;+;+;+;+;+;+;+	9300	1.67677	5.66246	3.70561
Soat1	1;1;1;1;1;1;1;1;1;1;1;1;1;1;1;1;1;1;1;1;1;1;1;1;1;1;1;1;1;1;1;1;1;1;1;1;1;1;1;1;1;1;1;1;1;1;1;1;1;1;1;1;1;1;1;1;1;1	156424525;156429793;156430725;156430983;156432204;156432204;156432204;156432204;156432847;156432847;156432847;156434153;156434153;156435793;156435793;156437704;156437704;156439288;156439288;156439701;156439701;156440150;156440507;156440507;156440576;156441229;156441229;156441229;156442381;156442381;156442381;156442381;156444555;156444555;156444555;156444555;156446411;156446541;156446541;156446541…	156431115;156431115;156431115;156431115;156432573;156432349;156432349;156432349;156433019;156432982;156432982;156434251;156434251;156435890;156435890;156437833;156437833;156439333;156439333;156439782;156439782;156441511;156440585;156440585;156440585;156441511;156441511;156441511;156442488;156442488;156442488;156442488;156444614;156444614;156444614;156444614;156446692;156446692;156446692;156446692…	-;-;-;-;-;-;-;-;-;-;-;-;-;-;-;-;-;-;-;-;-;-;-;-;-;-;-;-;-;-;-;-;-;-;-;-;-;-;-;-;-;-;-;-;-;-;-;-;-;-;-;-;-;-;-;-;-;-	9791	0.288556	1.23415	0.682184
Socs2	10;10;10;10;10;10;10;10;10;10;10;10;10;10;10;10;10;10;10;10;10;10;10;10;10;10;10;10;10;10;10;10;10;10;10;10;10;10;10;10;10;10	95385362;95387667;95388354;95388890;95388890;95388890;95390565;95390565;95390565;95392414;95401336;95410652;95411490;95411490;95411490;95412420;95412616;95412659;95412659;95412659;95413010;95413038;95413062;95413502;95414645;95414831;95414831;95414831;95414831;95414831;95414831;95414831;95414831;95415091;95415314;95415314;95415622;95416000;95416000;95416618;95416618;95417146	95388395;95388395;95388395;95389042;95389042;95389042;95390645;95390645;95392967;95392936;95401788;95410755;95413110;95413110;95413110;95413110;95413110;95412994;95412734;95413109;95413110;95413110;95413110;95413591;95414827;95415191;95415191;95415191;95415283;95415191;95415191;95415191;95415191;95415191;95415484;95415484;95415999;95416212;95416212;95416668;95416857;95417180	-;-;-;-;-;-;-;-;-;-;-;-;-;-;-;-;-;-;-;-;-;-;-;-;-;-;-;-;-;-;-;-;-;-;-;-;-;-;-;-;-;-	9531	1.41669	4.16661	4.12275
Spi1	2;2;2;2;2;2;2;2;2;2;2;2;2;2	91082390;91082408;91089814;91096096;91096780;91099400;91099430;91099430;91113255;91113255;91113255;91114245;91114245;91115075	91082523;91082523;91090310;91096993;91096993;91099526;91099526;91099526;91113315;91113445;91113445;91114410;91114366;91115756	+;+;+;+;+;+;+;+;+;+;+;+;+;+	2695	0.517358	2.35079	1.72696
Spink5	18;18;18;18;18;18;18;18;18;18;18;18;18;18;18;18;18;18;18;18;18;18;18;18;18;18;18;18;18;18;18;18	43963235;43964443;43966999;43969292;43977649;43981132;43982180;43983546;43986296;43987781;43989358;43990664;43992162;43992879;43996616;43998783;43999801;44000511;44003195;44006371;44007629;44009182;44009909;44010200;44012842;44013923;44014688;44014884;44015589;44016368;44018701;44020824	43963360;43964468;43967126;43969367;43977776;43981195;43982307;43983612;43986423;43987868;43989485;43990742;43992289;43992927;43996743;43998864;43999928;44000571;44003322;44006464;44007756;44009254;44010036;44010278;44012969;44013992;44014777;44015011;44015685;44016498;44018791;44022501	+;+;+;+;+;+;+;+;+;+;+;+;+;+;+;+;+;+;+;+;+;+;+;+;+;+;+;+;+;+;+;+	4785	0.107353	0.54252	0.638539
Sqle	15;15;15;15;15;15;15;15;15;15;15;15;15;15;15;15;15;15;15;15;15;15;15;15;15;15;15;15;15;15;15;15	59315077;59315081;59315107;59317796;59317796;59317796;59321314;59321314;59321314;59322836;59322836;59322867;59323614;59323614;59323614;59323807;59323807;59323807;59324462;59324462;59325543;59326035;59326035;59326035;59326570;59326570;59326570;59326570;59329740;59329740;59330725;59330725	59316129;59316129;59316129;59318048;59318048;59318048;59321494;59321494;59321494;59322932;59322932;59322932;59323727;59323727;59323727;59323978;59323978;59323978;59324557;59324557;59326177;59326177;59326177;59326177;59327199;59326666;59328958;59326666;59329827;59329827;59331192;59331192	+;+;+;+;+;+;+;+;+;+;+;+;+;+;+;+;+;+;+;+;+;+;+;+;+;+;+;+;+;+;+;+	5546	2.59342	5.56121	6.41887
Steap4	5;5;5;5;5	7960457;7975439;7976495;7978408;7980295	7960541;7975896;7977022;7978572;7982213	+;+;+;+;+	3155	12.4554	30.0815	26.8459
Sult1d1	5;5;5;5;5;5;5;5;5;5;5;5;5	87554645;87555940;87556854;87556854;87558488;87558488;87559761;87559761;87560153;87563870;87564710;87566036;87568797	87556049;87556049;87557034;87557034;87558582;87558582;87559887;87559887;87560191;87563967;87564835;87566192;87569027	-;-;-;-;-;-;-;-;-;-;-;-;-	2459	19.9797	63.4255	42.8243
Sult2a7	7;7;7;7;7;7;7;7;7;7;7;7;7;7;7;7;7;7;7;7;7;7;7;7	14465051;14465054;14465159;14465159;14470008;14470008;14473347;14473347;14477026;14477026;14477026;14477026;14490026;14490026;14490026;14490026;14491718;14491718;14491718;14491718;14492839;14492839;14492839;14494013	14465271;14465271;14465271;14465271;14470184;14470184;14473434;14473434;14477120;14477120;14477120;14477120;14490152;14490152;14490152;14490152;14491926;14491926;14491926;14491926;14492926;14492971;14492981;14494230	-;-;-;-;-;-;-;-;-;-;-;-;-;-;-;-;-;-;-;-;-;-;-;-	1278	0.0574204	2.85345	1.22319
Syk	13;13;13;13;13;13;13;13;13;13;13;13;13;13;13;13;13;13;13;13;13;13;13;13;13;13;13;13;13;13;13;13;13;13;13;13;13;13;13;13;13;13;13;13;13;13;13;13;13	52583173;52583437;52583503;52596853;52596958;52596959;52610796;52610796;52610796;52610796;52610796;52612295;52612295;52612295;52612295;52620801;52620801;52620801;52620801;52622680;52622680;52622680;52622680;52623245;52623245;52623245;52623245;52624708;52624708;52631657;52631657;52631657;52632888;52632888;52632888;52638038;52638038;52638038;52640605;52640605;52640605;52641865;52641865;52641865;526…	52583605;52583605;52583605;52597054;52597054;52597054;52611252;52613685;52611252;52611252;52611252;52612455;52612455;52612455;52612455;52620939;52620939;52620939;52620939;52622761;52622761;52622761;52622761;52624339;52623276;52623276;52623276;52624776;52624776;52631744;52631744;52631744;52633065;52633065;52633065;52638247;52638247;52638247;52640794;52640794;52640794;52642005;52642005;52642005;526…	+;+;+;+;+;+;+;+;+;+;+;+;+;+;+;+;+;+;+;+;+;+;+;+;+;+;+;+;+;+;+;+;+;+;+;+;+;+;+;+;+;+;+;+;+;+;+;+;+	9362	0.380163	1.24449	0.876626
Taf4b	18;18;18;18;18;18;18;18;18;18;18;18;18;18;18	14783245;14796913;14799079;14804466;14804717;14807345;14813091;14821438;14822094;14830019;14835792;14841905;14844414;14859172;14897964	14783934;14797058;14799186;14804627;14804839;14807434;14813690;14821570;14822205;14830188;14835922;14842030;14844470;14859276;14900359	+;+;+;+;+;+;+;+;+;+;+;+;+;+;+	5149	0.342046	0.900299	0.910798
Tcf24	1;1;1	9960163;9960171;9967099	9963521;9962809;9967932	-;-;-	4193	0.577545	3.22088	1.60143
Tead1	7;7;7;7;7;7;7;7;7;7;7;7;7;7;7;7;7;7;7;7;7;7;7;7;7;7;7;7;7;7;7;7;7;7;7;7;7;7;7;7;7;7;7;7;7;7;7;7;7;7;7;7;7;7;7;7;7;7;7;7;7;7;7;7;7;7;7;7;7;7;7;7;7;7;7;7;7;7;7;7;7;7;7;7;7;7;7;7;7;7;7;7;7;7;7;7;7;7;7;7;7;7;7;7;7;7;7;7;7;7;7;7;7;7;7;7;7;7;7;7;7;7;7;7;7;7;7;7;7	112679318;112679320;112679357;112679510;112691698;112693649;112742045;112759384;112759384;112759384;112759384;112759384;112759384;112759384;112759387;112759438;112759483;112759483;112759483;112759536;112759546;112806665;112839416;112839416;112839416;112839416;112839416;112839416;112839416;112839416;112839416;112839416;112839416;112839416;112839634;112841888;112841888;112841888;112841888;112841888…	112679726;112679726;112679726;112679726;112691930;112693815;112742129;112759639;112759529;112759639;112759639;112759639;112759639;112759639;112759639;112759639;112759639;112759639;112759639;112759639;112759639;112807068;112839480;112839480;112839480;112839480;112839480;112839480;112839480;112839480;112839480;112839480;112839480;112839480;112842474;112842374;112841950;112841950;112841950;112841950…	+;+;+;+;+;+;+;+;+;+;+;+;+;+;+;+;+;+;+;+;+;+;+;+;+;+;+;+;+;+;+;+;+;+;+;+;+;+;+;+;+;+;+;+;+;+;+;+;+;+;+;+;+;+;+;+;+;+;+;+;+;+;+;+;+;+;+;+;+;+;+;+;+;+;+;+;+;+;+;+;+;+;+;+;+;+;+;+;+;+;+;+;+;+;+;+;+;+;+;+;+;+;+;+;+;+;+;+;+;+;+;+;+;+;+;+;+;+;+;+;+;+;+;+;+;+;+;+;+	13570	0.694896	1.40743	2.10236
Tfec	6;6;6;6;6;6;6;6;6;6;6;6;6;6;6;6;6;6;6;6	16833373;16833388;16834692;16835202;16835202;16840469;16841416;16844195;16844195;16844197;16845364;16845364;16845364;16845364;16867460;16867460;16867460;16898261;16898261;16898261	16834330;16834330;16835263;16835349;16835349;16840544;16844251;16844251;16844251;16844251;16845478;16845996;16845478;16845478;16867711;16867711;16867711;16898441;16898399;16898441	-;-;-;-;-;-;-;-;-;-;-;-;-;-;-;-;-;-;-;-	5594	0.131182	0.651896	0.40647
Tgtp1	11;11;11;11;11;11;11;11	48985327;48987481;48987852;48992004;48992004;48992004;48992710;48993972	48987894;48987894;48987894;48992152;48992258;48992152;48992890;48994172	-;-;-;-;-;-;-;-	3205	0.34734	0.903119	0.96818
Tgtp2	11;11;11;11	49057194;49059901;49063963;49063963	49059761;49060026;49064206;49064204	-;-;-;-	2938	0.711852	1.59886	1.55994
Themis2	4;4;4;4;4;4	132781843;132783348;132785183;132789545;132792478;132796260	132783005;132783498;132786270;132789952;132792618;132796387	-;-;-;-;-;-	3079	0.524336	2.97099	1.50005
Thrsp	7;7;7	97412938;97416120;97417032	97413515;97417519;97417730	-;-;-	2189	3.48646	136.606	42.1662
Tifab	13;13;13	56173703;56176905;56178547	56176633;56177132;56178885	-;-;-	3498	0.125872	0.406403	0.406267
Timd4	11;11;11;11;11;11;11;11;11	46810800;46815431;46817549;46819177;46819991;46837028;46839261;46842156;46843119	46810869;46815772;46817782;46819260;46820044;46837074;46839348;46842195;46844332	+;+;+;+;+;+;+;+;+	2173	0.776721	7.22475	3.59695
Tle4	19;19;19;19;19;19;19;19;19;19;19;19;19;19;19;19;19;19;19;19;19;19;19;19;19;19;19;19;19;19;19;19;19;19;19;19;19;19;19;19	14448072;14448150;14451643;14451643;14452064;14452064;14452420;14452420;14453579;14453579;14454741;14454741;14464309;14464309;14464744;14464744;14465286;14465286;14466549;14466549;14467180;14467180;14468152;14468152;14491783;14516359;14517772;14517772;14544788;14544788;14564389;14564389;14594384;14594384;14595590;14595590;14596757;14596757;14597368;14597368	14449841;14449841;14451719;14451719;14452214;14452214;14452567;14452567;14453826;14453826;14454990;14454990;14464385;14464385;14464937;14464937;14465418;14465418;14466701;14466701;14467233;14467233;14468271;14468271;14491799;14516375;14517973;14517973;14544862;14544862;14564451;14564451;14594428;14594428;14595653;14595653;14596854;14596854;14598051;14597983	-;-;-;-;-;-;-;-;-;-;-;-;-;-;-;-;-;-;-;-;-;-;-;-;-;-;-;-;-;-;-;-;-;-;-;-;-;-;-;-	4640	2.04018	6.72701	4.08878
Tlr1	5;5;5;5;5;5;5;5;5	64924679;64924680;64930155;64930155;64932667;64932801;64932944;64933526;64933526	64927298;64927298;64930223;64930223;64932761;64933100;64933324;64933563;64933561	-;-;-;-;-;-;-;-;-	3346	0.0877265	0.350975	0.318542
Tlr13	X;X;X;X;X	106143204;106143229;106143622;106147446;106156695	106143321;106143321;106143622;106147613;106160493	+;+;+;+;+	4086	0.125718	0.968122	0.765165
Tlr4	4;4;4;4;4;4;4;4;4;4;4;4	66827584;66827613;66827619;66828202;66833894;66833894;66833894;66839229;66839229;66839229;66924366;66929018	66827921;66827921;66827921;66828290;66834060;66834060;66834060;66839429;66839618;66842800;66924488;66930284	+;+;+;+;+;+;+;+;+;+;+;+	5556	0.198119	1.22371	0.524351
Tlr7	X;X;X;X;X;X;X;X;X;X;X;X;X;X;X;X;X;X;X;X;X;X	167304929;167304931;167305214;167308342;167308356;167308789;167308789;167309281;167309281;167317680;167330001;167330001;167330001;167330001;167330001;167330001;167330401;167330401;167330437;167330437;167330437;167330437	167308485;167308485;167308485;167308485;167308485;167308856;167308856;167309361;167309361;167317798;167330099;167330099;167330099;167330099;167330099;167330099;167330443;167330497;167330510;167330491;167330528;167330558	-;-;-;-;-;-;-;-;-;-;-;-;-;-;-;-;-;-;-;-;-;-	4082	0.107864	0.878221	0.435179
Tm6sf1	7;7;7;7;7;7;7;7;7;7;7;7;7;7;7;7;7;7;7;7;7;7;7;7;7;7;7;7;7;7;7;7;7;7;7;7;7;7;7;7;7;7;7	81859001;81859020;81859118;81859151;81862687;81863150;81863150;81863150;81863150;81863150;81865247;81865247;81865247;81865247;81865247;81868641;81868641;81868641;81868641;81869733;81870697;81870697;81870697;81871369;81871369;81871369;81871369;81871369;81873493;81873732;81873732;81875724;81875724;81875724;81875724;81875975;81875975;81875975;81875975;81883215;81883215;81883215;81883215	81859540;81859540;81859540;81859540;81862718;81863253;81863253;81863253;81863253;81863253;81865344;81865398;81865344;81865344;81865344;81868744;81868744;81868744;81868744;81870779;81870779;81870779;81870779;81871490;81872415;81871490;81873877;81871490;81873836;81873836;81873836;81875816;81875816;81875816;81875816;81876094;81876094;81876094;81876094;81883407;81883419;81884434;81884071	+;+;+;+;+;+;+;+;+;+;+;+;+;+;+;+;+;+;+;+;+;+;+;+;+;+;+;+;+;+;+;+;+;+;+;+;+;+;+;+;+;+;+	5921	0.0991498	0.407116	0.246014
Tmem132a	19;19;19;19;19;19;19;19;19;19;19;19;19;19;19;19;19;19;19;19;19	10857822;10857834;10859564;10860124;10860124;10861530;10861530;10863223;10863223;10863465;10863465;10863955;10863955;10865256;10865256;10866469;10866469;10866930;10866930;10869539;10869539	10859151;10859755;10859755;10860397;10860397;10861732;10861732;10863366;10863366;10863660;10863660;10864104;10864104;10865587;10865587;10866687;10866687;10867144;10867144;10869778;10869940	-;-;-;-;-;-;-;-;-;-;-;-;-;-;-;-;-;-;-;-;-	4069	0.198382	0.805076	0.558809
Tmem229b	12;12;12;12;12;12;12;12;12;12;12;12;12;12;12;12;12;12;12	78961795;78961795;78961797;78961800;78964849;78973255;78977761;78977761;78977761;78977761;78977761;78977770;78980704;78980704;78983386;79006377;79006973;79007313;79007313	78965176;78965176;78965176;78965173;78965176;78973348;78977941;78977941;78977941;78977941;78977941;78977941;78980778;78980763;78983478;79006663;79007277;79007340;79007627	-;-;-;-;-;-;-;-;-;-;-;-;-;-;-;-;-;-;-	4732	0.108555	0.378793	0.330353
Tmem26	10;10;10;10;10;10	68723746;68740919;68748376;68751108;68775308;68778439	68724090;68740997;68748489;68751328;68775384;68782654	+;+;+;+;+;+	5052	0.0581023	0.3548	0.239104
Tmem39b	4;4;4;4;4;4;4;4;4;4;4;4;4;4;4;4;4;4;4;4;4;4;4;4;4;4;4;4;4;4;4	129676355;129676355;129676599;129678572;129678572;129678572;129684312;129684312;129686771;129686771;129691968;129691968;129691968;129692044;129692433;129692433;129692433;129692433;129692636;129693066;129693066;129693066;129693066;129693886;129693886;129693886;129693886;129696545;129696715;129696715;129696715	129676808;129676808;129676808;129678890;129678692;129678692;129684499;129684499;129687107;129687107;129692122;129692122;129692122;129692122;129692673;129692516;129692516;129692516;129692718;129693285;129693285;129693285;129693285;129694012;129694012;129694012;129694012;129696620;129696744;129696838;129696796	-;-;-;-;-;-;-;-;-;-;-;-;-;-;-;-;-;-;-;-;-;-;-;-;-;-;-;-;-;-;-	2286	0.385214	0.973363	0.932494
Tmem71	15;15;15;15;15;15;15;15;15;15	66526212;66532589;66532751;66538797;66541573;66551953;66555031;66557745;66559280;66560730	66527934;66532649;66532812;66538872;66541758;66552101;66555243;66557805;66559362;66561046	-;-;-;-;-;-;-;-;-;-	2931	0.100148	0.421757	0.387887
Tnnc1	14;14;14;14;14;14;14;14;14;14;14;14;14;14;14;14	31208312;31208330;31208332;31209803;31209803;31209803;31210060;31210060;31210060;31210564;31210564;31210564;31211280;31211306;31211506;31211506	31208378;31208378;31208378;31209833;31209833;31209833;31210206;31210206;31210206;31210678;31210998;31210678;31211416;31211416;31211636;31211729	+;+;+;+;+;+;+;+;+;+;+;+;+;+;+;+	1041	1.26887	6.08586	3.82242
Tnnc2	2;2;2;2;2;2;2;2;2	164777161;164777472;164777731;164777944;164777944;164778176;164778176;164779663;164779868	164777333;164777608;164777845;164778087;164778087;164778227;164778227;164779741;164779967	-;-;-;-;-;-;-;-;-	800	0.091729	2.5496	13.4562
Tnnt3	7;7;7;7;7;7;7;7;7;7;7;7;7;7;7;7;7;7;7;7;7;7;7;7;7;7;7;7;7;7;7;7;7;7;7;7;7;7;7;7;7;7;7;7;7;7;7;7;7;7;7;7;7;7;7;7;7;7;7;7;7;7;7;7;7;7;7;7;7;7;7;7;7;7;7;7;7;7;7;7;7;7;7;7;7;7;7;7;7;7;7;7;7;7;7;7;7;7;7;7;7;7;7;7;7;7;7;7;7;7;7;7;7;7;7;7;7;7;7;7;7;7;7;7;7;7;7;7;7;7;7;7;7;7;7;7;7;7;7;7;7;7;7;7;7;7;7;7;7;7;7;7;7;7;7;7;7;7;7;7;7;7;7;7;7;7;7;7;7;7;7;7;7;7;7;7;7;7;7;7;7;7;7;7;7;7;7;7;7;7;7;7;7;7;7;7;7;7;7;7…	142498836;142498836;142498836;142498836;142498836;142498836;142498836;142498836;142498843;142498843;142498843;142498843;142498846;142498864;142498872;142501617;142501620;142501620;142501620;142501620;142501620;142501620;142501620;142501620;142501620;142501620;142501620;142501620;142501620;142501620;142501620;142501620;142501638;142501638;142501638;142501638;142501638;142501638;142501638;142501638…	142498899;142498899;142498899;142498899;142498899;142498899;142498899;142498899;142498899;142498899;142498899;142498899;142498899;142498899;142498899;142501654;142501654;142501654;142501654;142501654;142501654;142501654;142501654;142501654;142501654;142501654;142501654;142501654;142501654;142501654;142501654;142501654;142501654;142501654;142501654;142501654;142501654;142501654;142501654;142501654…	+;+;+;+;+;+;+;+;+;+;+;+;+;+;+;+;+;+;+;+;+;+;+;+;+;+;+;+;+;+;+;+;+;+;+;+;+;+;+;+;+;+;+;+;+;+;+;+;+;+;+;+;+;+;+;+;+;+;+;+;+;+;+;+;+;+;+;+;+;+;+;+;+;+;+;+;+;+;+;+;+;+;+;+;+;+;+;+;+;+;+;+;+;+;+;+;+;+;+;+;+;+;+;+;+;+;+;+;+;+;+;+;+;+;+;+;+;+;+;+;+;+;+;+;+;+;+;+;+;+;+;+;+;+;+;+;+;+;+;+;+;+;+;+;+;+;+;+;+;+;+;+;+;+;+;+;+;+;+;+;+;+;+;+;+;+;+;+;+;+;+;+;+;+;+;+;+;+;+;+;+;+;+;+;+;+;+;+;+;+;+;+;+;+;+;+;+;+;+;+…	1583	0.139071	3.82643	23.9247
Tns4	11;11;11;11;11;11;11;11;11;11;11;11;11;11;11;11;11;11;11;11;11;11;11;11;11;11;11	99065678;99068175;99070402;99070402;99070653;99070653;99070684;99071317;99071317;99071317;99072209;99072209;99072209;99073672;99073672;99073672;99073896;99073896;99075115;99075115;99075533;99078406;99080080;99085471;99085667;99089239;99089239	99068322;99068322;99070428;99070428;99070721;99070721;99070721;99071485;99071485;99071485;99072280;99072280;99072280;99073749;99073864;99073749;99073988;99073988;99075341;99075240;99075619;99078830;99080455;99086186;99086186;99089285;99089306	-;-;-;-;-;-;-;-;-;-;-;-;-;-;-;-;-;-;-;-;-;-;-;-;-;-;-	5167	0.106517	0.305035	0.343797
Tpm2	4;4;4;4;4;4;4;4;4;4;4;4;4;4;4;4;4;4;4;4;4;4;4;4;4;4;4;4;4;4;4;4;4;4;4;4;4;4;4;4;4;4	43514711;43514711;43514711;43514712;43515682;43518230;43518230;43518230;43518230;43518402;43518402;43518402;43518402;43518644;43519003;43519003;43519227;43519227;43519227;43519227;43519389;43519389;43519389;43519389;43519389;43519611;43519611;43519611;43519611;43519611;43519668;43522675;43522675;43522675;43522675;43522675;43523241;43523241;43523241;43523241;43523241;43523701	43514861;43516003;43514861;43516003;43515841;43518299;43518299;43518299;43518299;43518464;43518464;43518464;43519078;43518719;43519078;43519078;43519297;43519297;43519297;43519297;43519506;43519506;43519506;43519506;43519506;43519669;43519744;43519744;43519744;43519744;43519744;43522800;43522800;43522800;43522800;43522800;43523373;43523595;43523388;43523464;43523438;43523765	-;-;-;-;-;-;-;-;-;-;-;-;-;-;-;-;-;-;-;-;-;-;-;-;-;-;-;-;-;-;-;-;-;-;-;-;-;-;-;-;-;-	2909	0.580204	1.73166	7.04698
Trim24	6;6;6;6;6;6;6;6;6;6;6;6;6;6;6;6;6;6;6;6;6;6;6;6;6;6;6;6;6;6;6;6;6;6;6;6;6;6;6;6;6;6;6;6;6;6;6;6;6;6;6;6;6;6;6;6;6;6;6;6;6;6;6;6;6;6;6;6;6;6;6;6;6;6;6;6;6;6;6;6;6;6;6	37870811;37870811;37870811;37870811;37876330;37878200;37900487;37903533;37903533;37903533;37903533;37903533;37903533;37908217;37908217;37908217;37908217;37908217;37915165;37915165;37915165;37915165;37915165;37915165;37915221;37919374;37919374;37919374;37919374;37919374;37919374;37919374;37927526;37927526;37927526;37927526;37927526;37927526;37931354;37931354;37931354;37931354;37931354;37943413;379…	37871474;37871474;37871474;37871474;37876470;37878236;37900730;37903651;37903651;37903651;37903651;37903651;37903651;37908364;37908364;37908364;37908364;37908364;37915297;37915297;37915297;37915297;37915297;37915297;37915297;37919490;37919490;37919490;37919490;37919490;37921505;37919490;37928008;37927640;37927640;37927640;37927640;37927640;37931500;37931484;37931500;37931500;37931500;37943530;379…	+;+;+;+;+;+;+;+;+;+;+;+;+;+;+;+;+;+;+;+;+;+;+;+;+;+;+;+;+;+;+;+;+;+;+;+;+;+;+;+;+;+;+;+;+;+;+;+;+;+;+;+;+;+;+;+;+;+;+;+;+;+;+;+;+;+;+;+;+;+;+;+;+;+;+;+;+;+;+;+;+;+;+	8521	2.41998	5.06546	6.81291
Trim30a	7;7;7;7;7;7;7;7;7;7;7;7;7;7	104409025;104411370;104411685;104411919;104411919;104412215;104412215;104412215;104416823;104421435;104429121;104430131;104435582;104465010	104411669;104411669;104411945;104411945;104411945;104412267;104412315;104412315;104416928;104421457;104429351;104430226;104436045;104465193	-;-;-;-;-;-;-;-;-;-;-;-;-;-	4111	0.624766	2.82657	1.34818
Trim30b	7;7;7;7;7;7;7;7;7;7;7;7;7;7;7;7;7;7;7;7	104355382;104355398;104355398;104356313;104357584;104357956;104358460;104358460;104358460;104358460;104359742;104361411;104362707;104363702;104365757;104365757;104365757;104369685;104369685;104369685	104356906;104357981;104357981;104359764;104357981;104357981;104358646;104358643;104358551;104358646;104359764;104363797;104363797;104363797;104366313;104366313;104366313;104369782;104369866;104369884	-;-;-;-;-;-;-;-;-;-;-;-;-;-;-;-;-;-;-;-	7527	0.058496	0.164232	0.174643
Tspan4	7;7;7;7;7;7;7;7;7;7;7;7;7;7;7;7;7;7;7;7;7;7;7;7;7;7;7;7;7;7;7;7;7;7	141475240;141475510;141475513;141475736;141476400;141482487;141482487;141482487;141482487;141482487;141489552;141489552;141489552;141489552;141489552;141490762;141490762;141490762;141490762;141491489;141491572;141491572;141491572;141491572;141491774;141491774;141491774;141491774;141491980;141491980;141491980;141492885;141492885;141492885	141475497;141475560;141475751;141475959;141476478;141482566;141482566;141482566;141482566;141482566;141489743;141489743;141489620;141489743;141489743;141490836;141490836;141490836;141490836;141491905;141491673;141491673;141491673;141491673;141491905;141491816;141491803;141491905;141492063;141492063;141492063;141492960;141493421;141493427	+;+;+;+;+;+;+;+;+;+;+;+;+;+;+;+;+;+;+;+;+;+;+;+;+;+;+;+;+;+;+;+;+;+	2178	7.6483	18.4461	16.0512
Ttn	2;2;2;2;2;2;2;2;2;2;2;2;2;2;2;2;2;2;2;2;2;2;2;2;2;2;2;2;2;2;2;2;2;2;2;2;2;2;2;2;2;2;2;2;2;2;2;2;2;2;2;2;2;2;2;2;2;2;2;2;2;2;2;2;2;2;2;2;2;2;2;2;2;2;2;2;2;2;2;2;2;2;2;2;2;2;2;2;2;2;2;2;2;2;2;2;2;2;2;2;2;2;2;2;2;2;2;2;2;2;2;2;2;2;2;2;2;2;2;2;2;2;2;2;2;2;2;2;2;2;2;2;2;2;2;2;2;2;2;2;2;2;2;2;2;2;2;2;2;2;2;2;2;2;2;2;2;2;2;2;2;2;2;2;2;2;2;2;2;2;2;2;2;2;2;2;2;2;2;2;2;2;2;2;2;2;2;2;2;2;2;2;2;2;2;2;2;2;2;2…	76703980;76703980;76703984;76705031;76705670;76705670;76705670;76705670;76706440;76706440;76706440;76706440;76706697;76706697;76706697;76706697;76708159;76708159;76708159;76708159;76708448;76708448;76708448;76708448;76708754;76708765;76708776;76708776;76714329;76714329;76714329;76714329;76715144;76715144;76715144;76715144;76715540;76715540;76715540;76715540;76716749;76716749;76716749;76716749;767…	76705329;76705329;76705329;76705329;76705972;76705972;76705972;76705972;76706593;76706593;76706593;76706593;76707388;76707388;76707388;76707388;76708315;76708315;76708315;76708315;76708597;76708608;76708619;76708619;76714212;76714212;76714212;76714212;76714922;76714922;76714922;76714922;76715449;76715449;76715449;76715449;76716115;76716115;76716115;76716115;76717048;76717048;76717048;76717048;767…	-;-;-;-;-;-;-;-;-;-;-;-;-;-;-;-;-;-;-;-;-;-;-;-;-;-;-;-;-;-;-;-;-;-;-;-;-;-;-;-;-;-;-;-;-;-;-;-;-;-;-;-;-;-;-;-;-;-;-;-;-;-;-;-;-;-;-;-;-;-;-;-;-;-;-;-;-;-;-;-;-;-;-;-;-;-;-;-;-;-;-;-;-;-;-;-;-;-;-;-;-;-;-;-;-;-;-;-;-;-;-;-;-;-;-;-;-;-;-;-;-;-;-;-;-;-;-;-;-;-;-;-;-;-;-;-;-;-;-;-;-;-;-;-;-;-;-;-;-;-;-;-;-;-;-;-;-;-;-;-;-;-;-;-;-;-;-;-;-;-;-;-;-;-;-;-;-;-;-;-;-;-;-;-;-;-;-;-;-;-;-;-;-;-;-;-;-;-;-;-…	116825	0.000628147	0.0158721	0.206189
Tyrobp	7;7;7;7;7;7;7;7;7;7;7;7;7;7;7;7	30413760;30413788;30413852;30414342;30414342;30414342;30414504;30414504;30414504;30415008;30415632;30415632;30415632;30417344;30417344;30417344	30413899;30413899;30413899;30414368;30414368;30414368;30414650;30414650;30414650;30415074;30415675;30415675;30415675;30417585;30417577;30417582	+;+;+;+;+;+;+;+;+;+;+;+;+;+;+;+	667	0.770139	3.79933	2.45021
Ubd	17;17	37193892;37195246	37193972;37196095	+;+	931	1.26115	2.58919	5.87681
Ube2c	2;2;2;2;2;2;2;2;2;2;2;2	164769898;164769903;164770367;164770367;164771293;164771293;164771854;164771854;164772167;164772167;164772504;164777190	164770080;164770080;164770394;164770394;164771379;164771379;164772058;164772058;164772226;164772226;164772907;164778822	+;+;+;+;+;+;+;+;+;+;+;+	2600	0.0846729	0.998446	4.30435
Upp2	2;2;2;2;2;2;2;2;2;2;2;2;2;2;2;2;2;2;2;2;2;2;2;2;2;2;2;2;2;2;2;2;2	58567298;58567318;58567387;58583304;58632665;58754942;58755180;58755358;58761809;58763675;58763675;58763675;58765325;58771421;58771421;58771421;58771421;58774116;58774116;58774116;58774116;58777805;58777805;58777805;58777805;58780002;58780002;58780002;58780002;58790029;58790029;58790029;58791778	58567528;58567528;58567528;58583782;58635281;58755422;58755422;58755422;58761862;58763792;58763792;58763792;58765358;58771579;58771579;58771579;58771579;58774230;58774230;58774230;58774230;58778014;58778014;58778014;58778014;58780148;58780148;58780148;58780148;58790302;58791242;58790668;58792971	+;+;+;+;+;+;+;+;+;+;+;+;+;+;+;+;+;+;+;+;+;+;+;+;+;+;+;+;+;+;+;+;+	7053	23.1709	178.444	105.696
Urad	5;5	147314984;147322157	147315465;147322440	-;-	766	6.61024	16.2187	14.0071
Usp2	9;9;9;9;9;9;9;9;9;9;9;9;9;9;9;9;9;9;9;9;9;9;9;9;9;9;9;9;9;9;9;9;9;9;9;9;9;9;9;9;9;9;9;9;9;9;9;9;9;9;9;9;9;9;9;9;9;9;9;9;9;9;9;9;9;9;9;9;9;9;9;9;9;9;9;9;9;9;9;9;9;9	44067021;44067078;44068038;44069443;44072204;44075366;44075366;44075366;44075366;44084939;44084950;44087190;44089132;44089132;44089132;44089132;44089132;44089141;44090030;44090030;44090030;44090030;44090030;44090030;44091004;44091004;44091004;44091004;44091004;44091004;44091212;44091212;44091212;44091212;44091212;44091212;44091836;44091836;44091836;44091836;44091836;44091836;44092085;44092085;440…	44067220;44067220;44068295;44069531;44072297;44075930;44076222;44076222;44076222;44085335;44085335;44087265;44089182;44089182;44089182;44089182;44089182;44089182;44090153;44090153;44090153;44090153;44090153;44090153;44091115;44091115;44091115;44091115;44091115;44091115;44091322;44091322;44091322;44091322;44091322;44091322;44091900;44091900;44091900;44091900;44091900;44091900;44092188;44092188;440…	+;+;+;+;+;+;+;+;+;+;+;+;+;+;+;+;+;+;+;+;+;+;+;+;+;+;+;+;+;+;+;+;+;+;+;+;+;+;+;+;+;+;+;+;+;+;+;+;+;+;+;+;+;+;+;+;+;+;+;+;+;+;+;+;+;+;+;+;+;+;+;+;+;+;+;+;+;+;+;+;+;+	4818	5.04909	25.8658	18.376
Vav1	17;17;17;17;17;17;17;17;17;17;17;17;17;17;17;17;17;17;17;17;17;17;17;17;17;17;17;17;17;17;17;17;17;17;17;17;17;17;17;17;17;17;17;17;17;17;17;17;17;17;17;17;17;17;17;17;17;17;17;17;17;17;17;17;17;17;17;17;17;17;17;17;17;17;17;17;17;17;17;17;17;17;17;17;17;17;17;17;17;17	57279100;57279100;57279127;57279357;57295982;57295982;57295982;57296552;57296552;57296552;57296700;57296700;57296700;57297049;57297049;57297049;57297246;57297246;57297246;57298772;57298772;57298772;57299101;57299101;57299101;57299842;57299842;57299842;57301181;57301181;57301181;57301861;57301861;57301861;57302074;57302074;57302074;57302265;57302265;57302265;57303015;57303015;57303015;57303064;573…	57279401;57279284;57279401;57279401;57296098;57296098;57296098;57296610;57296610;57296610;57296768;57296768;57296768;57297157;57297157;57297157;57297341;57297341;57297341;57298840;57298840;57298840;57299204;57299204;57299204;57299941;57299941;57299941;57301276;57301276;57301276;57301929;57301929;57301929;57302160;57302160;57302160;57302350;57302350;57302350;57303147;57303147;57303147;57303147;573…	+;+;+;+;+;+;+;+;+;+;+;+;+;+;+;+;+;+;+;+;+;+;+;+;+;+;+;+;+;+;+;+;+;+;+;+;+;+;+;+;+;+;+;+;+;+;+;+;+;+;+;+;+;+;+;+;+;+;+;+;+;+;+;+;+;+;+;+;+;+;+;+;+;+;+;+;+;+;+;+;+;+;+;+;+;+;+;+;+;+	3688	0.198978	0.854728	0.462404
Vav3	3;3;3;3;3;3;3;3;3;3;3;3;3;3;3;3;3;3;3;3;3;3;3;3;3;3;3;3;3;3;3;3;3;3;3;3;3;3;3;3;3;3;3;3;3;3;3;3;3;3;3;3;3;3;3;3;3;3;3;3;3;3;3;3;3;3;3;3	109340653;109340683;109341106;109423991;109423991;109423991;109442002;109494778;109494778;109494784;109496888;109496888;109496888;109501378;109501378;109501378;109503410;109503410;109503410;109506396;109506396;109508784;109508784;109510886;109510886;109515988;109515988;109519433;109519433;109521441;109521441;109525869;109525869;109527414;109527414;109528275;109528275;109562743;109562743;109563104…	109341242;109341242;109341242;109424107;109424107;109424107;109442212;109494836;109494836;109494836;109496953;109496953;109496953;109501486;109501486;109501486;109503696;109503502;109503502;109506464;109506464;109508887;109508887;109510985;109510985;109516083;109516083;109519501;109519501;109521527;109521527;109525954;109525954;109527546;109527546;109528384;109528384;109562844;109562844;109563541…	+;+;+;+;+;+;+;+;+;+;+;+;+;+;+;+;+;+;+;+;+;+;+;+;+;+;+;+;+;+;+;+;+;+;+;+;+;+;+;+;+;+;+;+;+;+;+;+;+;+;+;+;+;+;+;+;+;+;+;+;+;+;+;+;+;+;+;+	6005	0.0855425	0.329371	0.307653
Vcam1	3;3;3;3;3;3;3;3;3;3;3;3;3;3;3;3;3;3	116109949;116114353;116115885;116116628;116117223;116120798;116122280;116124383;116124383;116124618;116125955;116125955;116125955;116128533;116128533;116128533;116129304;116129304	116111037;116114619;116116151;116120715;116117543;116121073;116123793;116124649;116124649;116124649;116126275;116126275;116126275;116128928;116128808;116128808;116129457;116129688	-;-;-;-;-;-;-;-;-;-;-;-;-;-;-;-;-;-	8870	0.603943	3.0312	1.69028
Vill	9;9;9;9;9;9;9;9;9;9;9;9;9;9;9;9;9;9;9;9;9;9;9;9;9;9;9;9;9;9;9;9;9;9;9;9;9;9;9;9;9;9;9;9;9;9;9;9;9;9;9;9;9;9;9;9;9;9;9;9;9;9;9;9;9;9;9;9;9;9;9;9;9;9;9;9;9;9;9;9;9;9;9;9;9;9;9;9;9;9;9;9	119052778;119052778;119052778;119052802;119052865;119057783;119057783;119057783;119057783;119057783;119058005;119058005;119058005;119058005;119058311;119058311;119058311;119060345;119060345;119060345;119061477;119061477;119061477;119061895;119061895;119061895;119062442;119062442;119062442;119062606;119062606;119062606;119063248;119063248;119063248;119063448;119063454;119063455;119063458;119063482…	119052828;119052828;119052828;119052828;119052961;119057854;119057854;119057854;119058055;119057854;119058079;119058079;119058516;119058079;119058426;119058516;119058516;119060453;119060453;119060453;119061587;119061587;119061587;119062094;119062094;119062094;119062520;119062520;119062520;119062704;119062704;119062704;119063383;119063383;119063383;119063514;119063601;119063601;119063601;119063601…	+;+;+;+;+;+;+;+;+;+;+;+;+;+;+;+;+;+;+;+;+;+;+;+;+;+;+;+;+;+;+;+;+;+;+;+;+;+;+;+;+;+;+;+;+;+;+;+;+;+;+;+;+;+;+;+;+;+;+;+;+;+;+;+;+;+;+;+;+;+;+;+;+;+;+;+;+;+;+;+;+;+;+;+;+;+;+;+;+;+;+;+	4409	0.0832198	0.252337	0.370671
Vopp1	6;6;6;6;6;6;6;6;6;6;6;6;6;6;6;6;6;6;6;6;6;6;6;6;6;6;6	57727807;57752265;57754563;57758347;57762435;57762435;57762435;57762449;57762567;57774711;57774711;57774711;57774711;57774711;57774711;57789977;57789977;57789977;57789977;57789977;57808536;57824408;57824927;57824927;57824927;57824927;57824927	57730230;57754676;57754676;57762571;57762571;57762571;57762571;57762571;57762571;57774788;57774788;57774788;57774788;57774788;57774788;57790035;57790035;57790035;57790035;57790035;57808692;57824640;57825154;57825154;57825159;57825150;57825136	-;-;-;-;-;-;-;-;-;-;-;-;-;-;-;-;-;-;-;-;-;-;-;-;-;-;-	9821	0.194274	0.497187	0.513693
Vsig4	X;X;X;X;X;X;X;X;X;X;X;X	96247203;96248214;96249875;96249950;96269055;96269055;96269556;96269556;96290490;96290753;96293314;96293314	96247890;96248235;96249979;96249979;96269132;96269184;96269612;96269612;96290846;96290846;96293412;96293438	-;-;-;-;-;-;-;-;-;-;-;-	1484	2.42303	15.2647	6.79916
Vsir	10;10;10;10;10;10;10;10;10;10;10;10;10;10;10;10;10;10;10;10;10;10;10;10;10;10;10;10;10;10;10;10	60346851;60346851;60346905;60346907;60346984;60347012;60349323;60357809;60357842;60357842;60357842;60357842;60357842;60358045;60358944;60358944;60358944;60358944;60364201;60364201;60364201;60364201;60367766;60367766;60367766;60367766;60368529;60368532;60368532;60368902;60368902;60368902	60347103;60347103;60347103;60347103;60347103;60347103;60349413;60357998;60358267;60358267;60358135;60358267;60358267;60358216;60358994;60359038;60358994;60358994;60364308;60364308;60364308;60364308;60367768;60367793;60367793;60367793;60368725;60368725;60368725;60369293;60372684;60372684	+;+;+;+;+;+;+;+;+;+;+;+;+;+;+;+;+;+;+;+;+;+;+;+;+;+;+;+;+;+;+;+	5014	0.600062	1.41763	1.43132
Was	X;X;X;X;X;X;X;X;X;X;X;X;X;X;X;X	8081453;8085506;8085842;8086271;8086564;8086930;8086930;8087761;8087761;8088724;8088724;8088874;8089036;8089256;8089844;8090291	8081989;8085620;8086296;8086717;8086717;8086972;8086972;8087935;8087935;8088765;8088777;8088915;8089138;8089342;8089984;8090498	-;-;-;-;-;-;-;-;-;-;-;-;-;-;-;-	2381	0.277383	1.49265	0.984817
Wee1	7;7;7;7;7;7;7;7;7;7;7	110122046;110124456;110125807;110125996;110126701;110130829;110134755;110135638;110139149;110139562;110141956	110122925;110124661;110125867;110126168;110126822;110130975;110134850;110135723;110139319;110139707;110143286	+;+;+;+;+;+;+;+;+;+;+	3419	1.80292	6.43576	5.4035
Wfdc21	11;11;11	83746940;83749233;83752494	83747123;83749333;83752642	+;+;+	434	131.633	1081.22	394.246
Wnt2	6;6;6;6;6	17988940;18008584;18023061;18027924;18030205	17990043;18008848;18023338;18028150;18030585	-;-;-;-;-	2255	0.79729	1.76792	1.79609
Zfp429	13;13;13;13;13;13;13;13;13	67389309;67389327;67394064;67396044;67396044;67396630;67396630;67399696;67399696	67391064;67391064;67394146;67396139;67396139;67396756;67396756;67399750;67399767	-;-;-;-;-;-;-;-;-	2134	0.103163	0.632278	0.640969
Zfp872	9;9;9;9;9;9;9;9;9;9;9	22188090;22188168;22197067;22197067;22197067;22197375;22197375;22197375;22199418;22199418;22199418	22188173;22188231;22197193;22197193;22197193;22197435;22197435;22197435;22200624;22202123;22199792	+;+;+;+;+;+;+;+;+;+;+	3036	1.11187	3.56275	3.15961
Zfp970	2;2;2;2;2;2;2;2	177464733;177464846;177473286;177473286;177473618;177473618;177474826;177477640	177464848;177464848;177473412;177473412;177473678;177473678;177476203;177478129	+;+;+;+;+;+;+;+	2172	24.9861	145.175	63.7168
Dio1	4;4;4;4;4;4;4;4;4;4;4;4;4;4;4;4;4;4;4;4;4;4;4;4;4;4	107291465;107292167;107292330;107292334;107292364;107292364;107292364;107293749;107293749;107293749;107293749;107297597;107297597;107297597;107297597;107297597;107299817;107306782;107306782;107306782;107306782;107306782;107306782;107306891;107306891;107307043	107292422;107292422;107292422;107292422;107292422;107292422;107292422;107293948;107293948;107293948;107293948;107297740;107297740;107297740;107297740;107297740;107300096;107307066;107307118;107306918;107307124;107307142;107307169;107307118;107307124;107307118	-;-;-;-;-;-;-;-;-;-;-;-;-;-;-;-;-;-;-;-;-;-;-;-;-;-	1970	4.54454	9.67916	0.450863
Sptb	12;12;12;12;12;12;12;12;12;12;12;12;12;12;12;12;12;12;12;12;12;12;12;12;12;12;12;12;12;12;12;12;12;12;12;12;12;12;12;12;12;12;12;12;12;12;12;12;12;12;12;12;12;12;12;12;12;12;12;12;12;12;12;12;12;12;12;12;12;12;12	76580488;76583231;76583561;76583561;76583760;76583760;76587331;76596130;76597726;76598285;76598285;76598594;76598594;76599825;76599825;76600323;76600323;76601860;76601860;76603389;76603389;76604022;76604022;76605489;76605489;76606246;76606246;76607982;76607982;76608491;76608491;76609037;76609041;76610744;76610744;76611813;76611813;76611996;76611996;76612564;76612564;76619039;76619039;76620656;766…	76583392;76583392;76583603;76583603;76584086;76583933;76587590;76597801;76597801;76598334;76598334;76598790;76598790;76599909;76599909;76600461;76600461;76602104;76602104;76603763;76603763;76604226;76604226;76605619;76605619;76606524;76606524;76608071;76608071;76608693;76608697;76609304;76609304;76610890;76610890;76611903;76611903;76612198;76612198;76613320;76613320;76619176;76619176;76621526;766…	-;-;-;-;-;-;-;-;-;-;-;-;-;-;-;-;-;-;-;-;-;-;-;-;-;-;-;-;-;-;-;-;-;-;-;-;-;-;-;-;-;-;-;-;-;-;-;-;-;-;-;-;-;-;-;-;-;-;-;-;-;-;-;-;-;-;-;-;-;-;-	12147	0.555796	0.234066	1.32788
1700019A23Rik	7	30539666	30539861	+	196	10.4833	1.2614	2.90025
1700023H06Rik	13;13	80884224;80885152	80884894;80885524	-;-	1044	5.79896	1.6577	2.68842
1700028K03Rik	5;5;5;5;5;5;5;5;5;5;5;5;5;5;5;5;5;5;5;5;5;5;5	107534709;107534720;107534737;107534757;107539130;107539130;107539130;107539130;107540954;107543920;107543920;107543920;107543920;107545688;107545688;107545688;107546201;107546201;107546201;107548117;107548117;107549085;107549085	107534808;107534808;107534808;107534808;107539223;107539223;107539223;107539223;107541161;107549022;107544013;107544013;107544013;107545856;107545856;107545856;107546279;107546279;107546279;107548220;107548377;107549214;107551542	+;+;+;+;+;+;+;+;+;+;+;+;+;+;+;+;+;+;+;+;+;+;+	7963	0.15436	0.0388098	0.0394409
2900052L18Rik	11;11	120229802;120231495	120231298;120231585	-;-	1588	3.00372	0.895212	0.805421
2900093K20Rik	2	163419795	163420361	+	567	3.23559	1.19911	1.25319
3010026O09Rik	11;11;11;11;11;11;11;11;11;11;11;11;11;11;11;11	50174444;50174849;50174907;50176827;50176827;50176827;50177676;50182492;50182492;50187544;50194208;50194208;50196944;50196944;50197619;50199536	50174547;50174951;50174951;50176886;50176886;50176886;50178348;50182580;50182580;50187663;50194283;50194283;50197024;50197092;50197703;50200115	+;+;+;+;+;+;+;+;+;+;+;+;+;+;+;+	2039	4.42675	0.879082	2.05606
4632427E13Rik	7;7;7;7;7;7	92734166;92737637;92737658;92740000;92740706;92741062	92739264;92741468;92741468;92741459;92740976;92741459	-;-;-;-;-;-	7303	1.49721	0.330074	0.428107
4930522L14Rik	5;5;5;5;5;5;5	109735990;109738831;109738950;109739199;109739199;109751595;109751595	109737799;109739010;109739010;109739325;109739325;109751886;109751597	-;-;-;-;-;-;-	2409	0.594011	0.230916	0.235969
9330159M07Rik	9;9;9;9;9;9;9;9;9;9;9;9;9;9;9;9;9;9;9;9;9;9;9	88840236;88841798;88843510;88856145;88857232;88857814;88857814;88857814;88857814;88858226;88858226;88858226;88858226;88858390;88858390;88858390;88858390;88858390;88858703;88858809;88858809;88858809;88858809	88840726;88844266;88844266;88858300;88857583;88857871;88857871;88857871;88857871;88858300;88858300;88858300;88858300;88858444;88858444;88858444;88858444;88858444;88858801;88858870;88858862;88858853;88858866	-;-;-;-;-;-;-;-;-;-;-;-;-;-;-;-;-;-;-;-;-;-;-	5332	0.768377	0.098532	0.313169
9430064I24Rik	7	127800094	127802762	-	2669	48.3493	14.1032	21.6043
A230050P20Rik	9;9;9;9;9;9;9;9;9;9;9;9;9;9;9;9;9;9;9;9;9;9;9;9;9;9;9;9	20868642;20868658;20868680;20869277;20869330;20869330;20869330;20869604;20869604;20869604;20869604;20869762;20870772;20871197;20871197;20871376;20871376;20871376;20871376;20872868;20872868;20872868;20872868;20873110;20873110;20873542;20873542;20873542	20868936;20868936;20868936;20869453;20869453;20869453;20869453;20869653;20869653;20871235;20869653;20870095;20871235;20871235;20871235;20871525;20871525;20871525;20871525;20873121;20873264;20872971;20872971;20873264;20873264;20873771;20874307;20874307	+;+;+;+;+;+;+;+;+;+;+;+;+;+;+;+;+;+;+;+;+;+;+;+;+;+;+;+	3417	32.5038	9.93061	12.5393
AI606181	19	41593363	41596158	+	2796	1.67973	0.784765	0.686163
Abi3	11;11;11;11;11;11;11;11;11;11;11;11;11;11;11;11;11;11;11;11;11;11;11;11	95830074;95831943;95832723;95833209;95833209;95833209;95833640;95833640;95833640;95834003;95834003;95834003;95834306;95834306;95834306;95835778;95835778;95835778;95837070;95837070;95837077;95842021;95842021;95842409	95832876;95832876;95832876;95833331;95833334;95833334;95833800;95833800;95833800;95834098;95834098;95834098;95834391;95834391;95834391;95835890;95835954;95835954;95837237;95837237;95837317;95842098;95842409;95842476	-;-;-;-;-;-;-;-;-;-;-;-;-;-;-;-;-;-;-;-;-;-;-;-	4153	9.15302	3.31888	3.07117
Acot1	12;12;12	84009502;84014379;84016780	84009966;84014581;84017670	+;+;+	1559	202.051	43.5285	64.6295
Acot2	12;12;12	83987861;83990494;83992502	83988481;83990696;83993873	+;+;+	2196	38.9028	8.22791	12.9968
Adam11	11;11;11;11;11;11;11;11;11;11;11;11;11;11;11;11;11;11;11;11;11;11;11;11;11;11;11;11;11;11;11;11;11;11;11;11;11;11;11;11;11;11;11;11;11;11;11;11;11;11;11;11;11;11;11;11;11;11;11;11;11;11;11;11;11;11;11;11;11;11;11;11;11;11;11;11;11;11;11;11;11;11;11;11;11;11;11;11;11;11;11;11;11;11;11	102761439;102761439;102762089;102762148;102762148;102762186;102769767;102769894;102769894;102769894;102769894;102770121;102770121;102770121;102770121;102770121;102771235;102771235;102771235;102771235;102771235;102771435;102771435;102771435;102771435;102771435;102771482;102771737;102771737;102771915;102771915;102771915;102772045;102772045;102772045;102772455;102772455;102772455;102772612;102772612…	102761684;102761684;102762332;102762332;102762332;102762332;102769970;102769970;102769970;102769970;102769970;102770187;102770187;102770187;102770187;102770187;102771320;102771320;102771320;102771320;102771320;102771510;102771510;102771474;102771510;102771510;102771510;102771767;102771834;102771981;102771981;102771981;102772112;102772112;102772112;102772529;102772529;102772529;102772683;102772683…	+;+;+;+;+;+;+;+;+;+;+;+;+;+;+;+;+;+;+;+;+;+;+;+;+;+;+;+;+;+;+;+;+;+;+;+;+;+;+;+;+;+;+;+;+;+;+;+;+;+;+;+;+;+;+;+;+;+;+;+;+;+;+;+;+;+;+;+;+;+;+;+;+;+;+;+;+;+;+;+;+;+;+;+;+;+;+;+;+;+;+;+;+;+;+	5669	5.54031	2.2714	2.69484
Adra1a	14;14;14;14;14;14;14;14;14;14;14;14;14;14;14;14;14	66635251;66635258;66635309;66635341;66635556;66636981;66636981;66636981;66636991;66637454;66727446;66727446;66727446;66727446;66731564;66731564;66731564	66635603;66635603;66635603;66635603;66635603;66638460;66640333;66638460;66638460;66638460;66729984;66728000;66727831;66728000;66733329;66732741;66733462	+;+;+;+;+;+;+;+;+;+;+;+;+;+;+;+;+	8144	1.15788	0.197326	0.523497
Adra2a	19	54045182	54048982	+	3801	0.946008	0.0162611	0.28041
Arntl	7;7;7;7;7;7;7;7;7;7;7;7;7;7;7;7;7;7;7;7;7;7;7;7;7;7;7;7;7;7;7;7;7;7;7;7;7;7;7;7;7;7;7;7;7;7;7;7;7;7;7;7;7;7;7;7;7;7;7;7;7;7;7;7;7;7;7;7;7;7;7;7;7;7;7;7;7;7;7;7;7;7	113207465;113207526;113207557;113234623;113234624;113234624;113234624;113239754;113243352;113274626;113274626;113274626;113279457;113279457;113279457;113280650;113280650;113280650;113280650;113281402;113283257;113283257;113283257;113283521;113283521;113283521;113283521;113284999;113284999;113284999;113284999;113287117;113287117;113287117;113287117;113291461;113291461;113291461;113291461;113293178…	113207644;113207644;113207644;113234696;113234696;113234696;113234696;113243748;113243511;113274753;113274753;113274753;113279582;113279582;113279582;113280802;113280802;113280802;113280802;113281422;113283295;113283295;113283295;113283562;113283562;113283562;113283562;113285156;113285156;113285156;113285156;113287196;113287196;113287196;113287196;113291553;113291553;113291553;113291553;113293295…	+;+;+;+;+;+;+;+;+;+;+;+;+;+;+;+;+;+;+;+;+;+;+;+;+;+;+;+;+;+;+;+;+;+;+;+;+;+;+;+;+;+;+;+;+;+;+;+;+;+;+;+;+;+;+;+;+;+;+;+;+;+;+;+;+;+;+;+;+;+;+;+;+;+;+;+;+;+;+;+;+;+	7523	2.38986	0.246478	0.443923
Asap2	12;12;12;12;12;12;12;12;12;12;12;12;12;12;12;12;12;12;12;12;12;12;12;12;12;12;12;12;12;12;12;12;12;12;12;12;12;12;12;12;12;12;12;12;12;12;12;12;12;12;12;12;12;12;12;12;12;12;12;12;12;12;12;12;12;12;12;12;12;12;12;12;12;12;12;12;12;12;12;12;12;12;12;12;12;12;12;12;12;12;12;12;12;12;12;12;12;12;12;12;12;12;12;12;12;12;12	21111748;21111748;21111756;21111954;21168204;21168204;21168204;21168204;21185098;21185098;21185098;21185098;21199544;21199544;21199544;21199544;21200880;21200880;21200880;21200880;21203960;21203960;21203960;21203960;21206303;21206303;21206303;21206303;21212809;21212809;21212809;21212809;21213139;21213139;21213139;21213148;21214362;21214362;21217975;21217975;21217975;21217975;21218188;21218188;212…	21112169;21112169;21112169;21112169;21168276;21168276;21168276;21168276;21185243;21185243;21185243;21185243;21199618;21199618;21199618;21199618;21200929;21200929;21200929;21200929;21204089;21204089;21204089;21204089;21206388;21206388;21206388;21206388;21212884;21212884;21212884;21212884;21213225;21213225;21213225;21213225;21214370;21214370;21218078;21218078;21218078;21218078;21218257;21218257;212…	+;+;+;+;+;+;+;+;+;+;+;+;+;+;+;+;+;+;+;+;+;+;+;+;+;+;+;+;+;+;+;+;+;+;+;+;+;+;+;+;+;+;+;+;+;+;+;+;+;+;+;+;+;+;+;+;+;+;+;+;+;+;+;+;+;+;+;+;+;+;+;+;+;+;+;+;+;+;+;+;+;+;+;+;+;+;+;+;+;+;+;+;+;+;+;+;+;+;+;+;+;+;+;+;+;+;+	5687	5.16147	1.02706	1.38689
Avpr1a	10;10	122448499;122452074	122449789;122453453	+;+	2671	25.7432	5.78515	11.5589
B230206H07Rik	7;7;7;7;7	141359141;141359178;141360880;141365035;141365035	141360421;141362036;141362819;141365082;141365110	-;-;-;-;-	3755	14.0513	3.04516	6.52845
B230206L02Rik	11;11;11;11;11;11;11;11;11;11;11;11	94133485;94133502;94135660;94138487;94138487;94138487;94149836;94151338;94155456;94155456;94155577;94155577	94133555;94133555;94135824;94138663;94138845;94138663;94149965;94151412;94155497;94155497;94155776;94155776	+;+;+;+;+;+;+;+;+;+;+;+	1042	3.66212	1.00839	1.7048
BC021767	3;3;3;3;3;3;3;3;3;3;3;3;3;3;3;3;3;3	94661830;94661908;94662322;94662322;94663107;94663107;94663530;94663530;94663736;94663736;94664976;94664976;94665983;94665983;94667114;94669158;94669956;94670480	94662049;94662049;94662485;94662485;94663215;94663215;94663648;94663648;94663819;94663819;94665065;94665065;94666144;94666101;94667284;94669415;94670155;94670696	-;-;-;-;-;-;-;-;-;-;-;-;-;-;-;-;-;-	1794	1.82354	0.803787	0.726007
C330002G04Rik	19;19;19;19;19;19;19	23037390;23051551;23061814;23063340;23063550;23064357;23075757	23038620;23051705;23062079;23063438;23063668;23064443;23075853	-;-;-;-;-;-;-	2054	82.33	2.89634	7.83553
Cck	9;9;9;9;9;9;9;9;9;9;9;9;9;9;9;9;9	121489824;121489824;121489824;121489943;121490160;121490183;121493369;121493465;121493465;121494317;121494317;121494317;121494317;121494317;121494734;121495598;121495598	121490201;121490201;121490201;121490201;121490201;121490201;121493531;121493654;121493564;121494532;121494510;121494532;121494840;121494532;121494860;121495639;121495694	-;-;-;-;-;-;-;-;-;-;-;-;-;-;-;-;-	1305	16.9259	3.3154	0.762287
Cdkn1a	17;17;17;17;17;17;17;17	29090979;29093772;29098207;29098397;29098397;29099344;29099344;29099344	29091101;29093861;29098837;29098837;29098837;29100722;29099569;29099527	+;+;+;+;+;+;+;+	2223	7.46046	0.750711	0.831065
Ces2h	8;8;8;8;8;8;8;8;8;8;8;8	105000853;105014451;105015936;105016555;105016770;105017435;105017807;105018045;105018370;105018926;105019934;105020224	105000925;105014655;105016077;105016688;105017028;105017533;105017947;105018125;105018514;105019063;105020006;105021178	+;+;+;+;+;+;+;+;+;+;+;+	2445	11.15	2.78075	4.9405
Cgn	3;3;3;3;3;3;3;3;3;3;3;3;3;3;3;3;3;3;3;3;3;3;3;3;3;3;3;3;3;3;3;3;3;3;3;3;3;3;3;3;3;3;3;3;3;3;3;3;3;3;3;3;3	94760069;94760069;94761774;94761774;94762559;94762559;94762982;94762982;94763188;94763188;94764462;94764462;94765499;94765499;94767117;94767117;94769160;94769160;94769962;94769962;94770493;94770493;94773128;94773128;94773497;94773497;94774203;94774203;94774900;94774900;94775215;94775215;94776109;94776109;94777994;94777994;94777994;94777994;94778201;94778201;94778201;94778379;94778379;94778379;947…	94761501;94761501;94761937;94761937;94762667;94762667;94763100;94763100;94763271;94763271;94764551;94764551;94765660;94765660;94767287;94767287;94769417;94769417;94770168;94770168;94770702;94770702;94773260;94773260;94773645;94773645;94774415;94774415;94775032;94775032;94776236;94776236;94776236;94776236;94778270;94778089;94778065;94778065;94778270;94778270;94778270;94778479;94778479;94778479;947…	-;-;-;-;-;-;-;-;-;-;-;-;-;-;-;-;-;-;-;-;-;-;-;-;-;-;-;-;-;-;-;-;-;-;-;-;-;-;-;-;-;-;-;-;-;-;-;-;-;-;-;-;-	6021	15.6726	3.23281	5.70207
Chpf2	5;5;5;5;5;5;5;5;5;5;5;5;5;5;5;5;5;5	24586741;24586742;24586750;24586772;24586825;24588075;24589097;24589097;24589097;24590309;24590309;24590309;24591069;24591069;24591069;24593487;24593618;24594471	24588300;24587123;24588300;24587126;24586983;24588248;24589173;24589661;24589661;24590491;24590491;24590491;24591220;24592484;24593353;24593804;24594395;24594556	+;+;+;+;+;+;+;+;+;+;+;+;+;+;+;+;+;+	5588	6.26082	1.9412	2.96914
Chrna2	14;14;14;14;14;14;14;14;14;14;14;14;14;14	66135039;66140933;66142144;66142144;66143357;66143357;66143921;66143921;66146406;66146406;66148787;66148787;66150951;66150951	66135271;66141005;66142286;66142286;66143508;66143508;66143965;66143965;66146515;66146515;66149819;66149819;66152948;66151167	+;+;+;+;+;+;+;+;+;+;+;+;+;+	3787	5.61952	1.79534	2.139
Cldn1	16;16;16;16	26356642;26360843;26363070;26371404	26359200;26360927;26363234;26371841	-;-;-;-	3247	32.9061	4.4924	13.3052
Clpx	9;9;9;9;9;9;9;9;9;9;9;9;9;9;9;9;9;9;9;9;9;9;9;9;9;9;9;9;9;9;9;9;9;9;9	65294260;65294295;65294332;65299901;65299901;65299901;65301848;65301848;65301848;65308468;65308468;65308468;65310152;65310152;65310152;65312098;65316644;65316644;65316644;65317329;65317329;65317329;65318663;65318663;65318663;65320819;65320819;65322544;65322544;65324207;65324207;65326782;65326782;65329814;65329814	65294565;65294565;65294565;65300064;65300064;65300064;65301965;65301965;65301965;65309230;65308622;65308622;65310311;65310311;65310311;65312139;65316820;65316820;65316820;65317493;65317493;65317493;65318737;65318751;65318751;65320983;65320983;65322843;65322843;65324299;65324299;65326888;65326888;65330658;65330657	+;+;+;+;+;+;+;+;+;+;+;+;+;+;+;+;+;+;+;+;+;+;+;+;+;+;+;+;+;+;+;+;+;+;+	3494	114.072	22.7227	39.7072
Clstn3	6;6;6;6;6;6;6;6;6;6;6;6;6;6;6;6;6;6;6;6;6;6;6;6;6;6;6;6;6;6;6;6;6;6;6;6;6;6;6;6;6;6;6;6;6;6;6;6;6;6	124430759;124430759;124431304;124431958;124431958;124431958;124433408;124436772;124436818;124436818;124437375;124437375;124438270;124438270;124438270;124438759;124438759;124438759;124438904;124449490;124449490;124449490;124449774;124449774;124450706;124450706;124451306;124451306;124455929;124456877;124456877;124456877;124457856;124457856;124457856;124458544;124458544;124459158;124459158;124459766…	124431732;124431732;124431732;124432160;124432160;124432160;124433503;124436953;124436953;124436953;124437520;124437520;124438440;124438440;124438440;124438879;124438985;124438985;124438985;124450172;124449638;124449638;124449931;124449931;124450759;124450759;124451468;124451468;124456176;124456989;124456989;124456989;124457885;124458137;124458137;124458729;124458729;124459307;124459307;124459974…	-;-;-;-;-;-;-;-;-;-;-;-;-;-;-;-;-;-;-;-;-;-;-;-;-;-;-;-;-;-;-;-;-;-;-;-;-;-;-;-;-;-;-;-;-;-;-;-;-;-	4968	0.827186	0.304813	0.36472
Cntnap1	11;11;11;11;11;11;11;11;11;11;11;11;11;11;11;11;11;11;11;11;11;11;11;11;11;11;11	101170523;101176041;101177234;101177423;101177999;101177999;101178236;101178236;101178815;101179494;101180310;101181232;101181638;101182203;101182433;101182883;101183214;101183455;101183852;101184531;101185047;101186509;101187000;101188263;101188509;101188864;101189367	101170957;101176327;101177335;101177616;101178146;101178146;101178316;101178439;101178999;101179637;101180571;101181381;101181809;101182309;101182552;101183086;101183370;101183582;101184037;101184752;101185286;101186862;101187127;101188356;101188754;101188911;101190724	+;+;+;+;+;+;+;+;+;+;+;+;+;+;+;+;+;+;+;+;+;+;+;+;+;+;+	5875	1.54885	0.399783	0.755915
Col17a1	19;19;19;19;19;19;19;19;19;19;19;19;19;19;19;19;19;19;19;19;19;19;19;19;19;19;19;19;19;19;19;19;19;19;19;19;19;19;19;19;19;19;19;19;19;19;19;19;19;19;19;19;19;19;19;19;19;19;19;19;19;19;19;19;19;19;19;19;19;19;19;19;19;19;19;19;19;19;19;19;19;19;19;19;19;19;19;19;19;19;19;19;19;19;19;19;19;19;19;19;19;19;19;19;19;19;19;19;19;19;19;19;19	47646344;47646344;47647600;47647600;47647794;47647794;47648099;47648099;47648100;47648731;47648731;47648731;47649326;47649326;47649326;47650048;47650257;47650257;47650726;47650726;47651211;47651211;47651753;47651753;47652124;47652124;47652590;47652590;47653349;47653349;47653781;47653781;47654013;47654013;47654169;47654169;47655191;47655191;47656183;47656183;47657085;47657085;47657463;47657463;476…	47647278;47647278;47647680;47647680;47647856;47647856;47648227;47648227;47648227;47649090;47649090;47649090;47649595;47649472;47649472;47650158;47650346;47650346;47650866;47650866;47651276;47651276;47651890;47651890;47652246;47652246;47652640;47652640;47653408;47653408;47653834;47653834;47654054;47654054;47654222;47654222;47655268;47655268;47656218;47656218;47657165;47657165;47657498;47657498;476…	-;-;-;-;-;-;-;-;-;-;-;-;-;-;-;-;-;-;-;-;-;-;-;-;-;-;-;-;-;-;-;-;-;-;-;-;-;-;-;-;-;-;-;-;-;-;-;-;-;-;-;-;-;-;-;-;-;-;-;-;-;-;-;-;-;-;-;-;-;-;-;-;-;-;-;-;-;-;-;-;-;-;-;-;-;-;-;-;-;-;-;-;-;-;-;-;-;-;-;-;-;-;-;-;-;-;-;-;-;-;-;-;-	5765	0.305498	0.128656	0.0739525
Crot	5;5;5;5;5;5;5;5;5;5;5;5;5;5;5;5;5;5;5;5;5;5;5;5;5;5;5;5;5;5	8966033;8968647;8968870;8969048;8969916;8973586;8973603;8973945;8973945;8974133;8974133;8976008;8976008;8977455;8977455;8978198;8978198;8981767;8983689;8986181;8987768;8988104;8988104;8989606;8989606;8993506;8993506;8996452;8996452;8997104	8966972;8968766;8968963;8969126;8970039;8973716;8973716;8974052;8974052;8974216;8974216;8976109;8976109;8977580;8977580;8978291;8978291;8982144;8983797;8987892;8987892;8988285;8988285;8989730;8989730;8993641;8993641;8997042;8996547;8997324	-;-;-;-;-;-;-;-;-;-;-;-;-;-;-;-;-;-;-;-;-;-;-;-;-;-;-;-;-;-	5456	321.274	76.0542	115.271
Cspg5	9;9;9;9;9;9;9;9;9;9;9;9;9;9;9;9;9;9;9;9	110243783;110243783;110245483;110245531;110246065;110246295;110246295;110246295;110246295;110250959;110250959;110250959;110250959;110256145;110256145;110256145;110256145;110262060;110262060;110262060	110245694;110245694;110245694;110245694;110247390;110247390;110247605;110247390;110247390;110251147;110251147;110251147;110251147;110262563;110256220;110256220;110256301;110262575;110262576;110262575	+;+;+;+;+;+;+;+;+;+;+;+;+;+;+;+;+;+;+;+	10074	2.06149	0.693306	0.536059
Cyfip2	11;11;11;11;11;11;11;11;11;11;11;11;11;11;11;11;11;11;11;11;11;11;11;11;11;11;11;11;11;11;11;11;11;11;11;11;11;11;11;11;11;11;11;11;11;11;11;11;11;11;11;11;11;11;11;11;11;11;11;11;11;11;11;11;11;11;11;11;11;11;11;11;11;11;11;11;11;11;11;11;11;11;11;11;11;11;11;11;11;11;11;11;11;11;11;11;11;11;11;11;11;11;11;11;11;11;11;11;11;11;11;11;11;11;11;11;11	46193850;46193850;46193855;46196071;46198991;46198991;46198991;46198991;46200646;46200646;46200646;46200646;46207387;46207387;46207387;46207387;46208288;46208288;46208288;46208288;46221336;46221336;46221336;46221336;46222610;46222610;46222610;46222610;46224062;46224062;46224062;46224062;46240004;46240004;46240004;46240004;46242287;46242287;46242287;46242287;46247559;46247559;46247559;46247559;462…	46196467;46196467;46196467;46196467;46199138;46199138;46199138;46199138;46200884;46200884;46200884;46200884;46207481;46207481;46207481;46207481;46208360;46208360;46208360;46208360;46221466;46221466;46221466;46221466;46222700;46222700;46222700;46222700;46224205;46224205;46224205;46224205;46240091;46240091;46240091;46240091;46242486;46242486;46242486;46242486;46247678;46247678;46247678;46247678;462…	-;-;-;-;-;-;-;-;-;-;-;-;-;-;-;-;-;-;-;-;-;-;-;-;-;-;-;-;-;-;-;-;-;-;-;-;-;-;-;-;-;-;-;-;-;-;-;-;-;-;-;-;-;-;-;-;-;-;-;-;-;-;-;-;-;-;-;-;-;-;-;-;-;-;-;-;-;-;-;-;-;-;-;-;-;-;-;-;-;-;-;-;-;-;-;-;-;-;-;-;-;-;-;-;-;-;-;-;-;-;-;-;-;-;-;-;-	7103	0.855742	0.14793	0.380139
Cyp46a1	12;12;12;12;12;12;12;12;12;12;12;12;12;12;12	108334377;108342323;108343014;108345574;108346089;108351182;108351914;108352774;108353090;108355424;108357487;108358031;108360481;108361196;108361514	108334564;108342403;108343095;108345647;108346175;108351320;108352024;108352924;108353152;108355496;108357571;108358141;108360569;108361262;108362231	+;+;+;+;+;+;+;+;+;+;+;+;+;+;+	2119	125.373	37.1464	25.3173
Cyp4a10	4;4;4;4;4;4;4;4;4;4;4;4;4;4;4;4;4;4;4;4;4;4;4;4;4;4	115518264;115518288;115519630;115519630;115520252;115520252;115521068;115521068;115524248;115524248;115524725;115524725;115525302;115525302;115525498;115525498;115525785;115525785;115529235;115529235;115529442;115529442;115532531;115532531;115533134;115533134	115518510;115518510;115519774;115519774;115520266;115520296;115521195;115521195;115524372;115524372;115524879;115524879;115525408;115525408;115525688;115525688;115525918;115525918;115529299;115529299;115529518;115529518;115532704;115532704;115533646;115533649	+;+;+;+;+;+;+;+;+;+;+;+;+;+;+;+;+;+;+;+;+;+;+;+;+;+	2109	821.215	254.748	204.552
Cyp4a12b	4;4;4;4;4;4;4;4;4;4;4;4	115411624;115413257;115414011;115414470;115432442;115432881;115433467;115433668;115433959;115434968;115435180;115438057	115411871;115413398;115414055;115414597;115432566;115433035;115433573;115433858;115434092;115435032;115435256;115439034	+;+;+;+;+;+;+;+;+;+;+;+	2395	32.0291	11.7661	6.8914
Cyp4a14	4;4;4;4;4;4;4;4;4;4;4;4;4;4;4	115486200;115489789;115489962;115491066;115491287;115491561;115492081;115492610;115493575;115494064;115494169;115494886;115494886;115495919;115495919	115487311;115489865;115490026;115491199;115491477;115491667;115492235;115492734;115493702;115494213;115494213;115495018;115495018;115496140;115496142	-;-;-;-;-;-;-;-;-;-;-;-;-;-;-	2601	1317.34	605.342	446.552
Cyp8b1	9	121914356	121916305	-	1950	180.523	63.7262	71.7119
Dcstamp	15;15;15;15	39745932;39754184;39759314;39760329	39745967;39755225;39759622;39760934	+;+;+;+	1993	2.98246	0.403167	1.14089
Dgkh	14;14;14;14;14;14;14;14;14;14;14;14;14;14;14;14;14;14;14;14;14;14;14;14;14;14;14;14;14	78569609;78577449;78578689;78581479;78584375;78585593;78587120;78587523;78589874;78595147;78595377;78596645;78599008;78603026;78604277;78606901;78609509;78612855;78616227;78616479;78618523;78619772;78624377;78624806;78627687;78628061;78651681;78653686;78724907	78570157;78577557;78578808;78581571;78584480;78585756;78587254;78587636;78589981;78595243;78595487;78596762;78599139;78603133;78604550;78607000;78609594;78612939;78616366;78616587;78618682;78619874;78624502;78624912;78627819;78628165;78651761;78653796;78725089	-;-;-;-;-;-;-;-;-;-;-;-;-;-;-;-;-;-;-;-;-;-;-;-;-;-;-;-;-	3967	0.406965	0.155807	0.143294
Dlec1	9;9;9;9;9;9;9;9;9;9;9;9;9;9;9;9;9;9;9;9;9;9;9;9;9;9;9;9;9;9;9;9;9;9;9;9;9;9;9;9;9;9;9;9;9;9;9;9;9;9;9;9;9;9;9;9;9;9;9;9;9;9;9;9;9;9;9;9;9;9;9;9;9;9;9;9;9;9;9;9;9;9;9;9;9;9;9;9;9;9;9;9;9;9;9;9;9;9;9;9;9;9;9;9;9;9;9;9;9;9;9;9;9;9;9;9;9;9;9;9;9;9;9;9;9;9;9;9;9;9;9;9;9;9;9;9;9;9;9;9	119102478;119102478;119102478;119102509;119105802;119105802;119105802;119105802;119110101;119110101;119110101;119110101;119112057;119112057;119112057;119112057;119112409;119112409;119112409;119112409;119114964;119114964;119114964;119114964;119119648;119119648;119119648;119119648;119119654;119120803;119120803;119120803;119120803;119120803;119121788;119121788;119121788;119121788;119121788;119123145…	119102925;119102925;119102925;119102925;119105952;119105952;119105952;119105952;119110211;119110211;119110211;119110211;119112244;119112244;119112244;119112244;119112626;119112626;119112626;119112626;119115042;119115042;119115042;119115042;119119735;119119735;119119735;119119735;119119735;119120976;119120976;119120976;119120976;119120976;119121924;119121924;119121924;119121924;119121924;119123237…	+;+;+;+;+;+;+;+;+;+;+;+;+;+;+;+;+;+;+;+;+;+;+;+;+;+;+;+;+;+;+;+;+;+;+;+;+;+;+;+;+;+;+;+;+;+;+;+;+;+;+;+;+;+;+;+;+;+;+;+;+;+;+;+;+;+;+;+;+;+;+;+;+;+;+;+;+;+;+;+;+;+;+;+;+;+;+;+;+;+;+;+;+;+;+;+;+;+;+;+;+;+;+;+;+;+;+;+;+;+;+;+;+;+;+;+;+;+;+;+;+;+;+;+;+;+;+;+;+;+;+;+;+;+;+;+;+;+;+;+	6696	23.3925	9.36913	10.6754
Dnah8	17;17;17;17;17;17;17;17;17;17;17;17;17;17;17;17;17;17;17;17;17;17;17;17;17;17;17;17;17;17;17;17;17;17;17;17;17;17;17;17;17;17;17;17;17;17;17;17;17;17;17;17;17;17;17;17;17;17;17;17;17;17;17;17;17;17;17;17;17;17;17;17;17;17;17;17;17;17;17;17;17;17;17;17;17;17;17;17;17;17;17;17;17	30624354;30635321;30635942;30643256;30644557;30648416;30649624;30653233;30656577;30656886;30657969;30661986;30663298;30668274;30670612;30672240;30673780;30677087;30683631;30684131;30686383;30690181;30693949;30695110;30700390;30701845;30704655;30706385;30708291;30710502;30712273;30713034;30715480;30717764;30718827;30720999;30722899;30725082;30726786;30728163;30729081;30731014;30736029;30737251;307…	30624560;30635833;30636076;30643340;30644708;30648605;30649787;30653409;30656690;30656993;30658070;30662132;30663495;30668350;30670711;30672359;30673915;30677274;30683711;30684247;30686502;30690316;30694061;30695216;30700462;30702031;30704851;30706511;30708526;30710606;30712386;30713096;30715580;30717901;30719067;30721198;30723052;30725245;30726888;30728267;30729242;30731238;30736201;30737429;307…	+;+;+;+;+;+;+;+;+;+;+;+;+;+;+;+;+;+;+;+;+;+;+;+;+;+;+;+;+;+;+;+;+;+;+;+;+;+;+;+;+;+;+;+;+;+;+;+;+;+;+;+;+;+;+;+;+;+;+;+;+;+;+;+;+;+;+;+;+;+;+;+;+;+;+;+;+;+;+;+;+;+;+;+;+;+;+;+;+;+;+;+;+	14583	0.161027	0.0190728	0.0584703
E230016M11Rik	6;6;6;6;6;6;6;6;6;6;6;6;6;6;6;6;6;6;6	67036599;67036605;67036655;67043759;67063395;67063395;67063395;67064613;67066829;67066829;67073541;67073806;67076760;67077248;67078227;67078227;67079903;67079903;67079903	67036935;67036935;67036935;67043918;67063761;67064718;67063534;67064718;67066948;67066948;67073670;67074026;67077365;67077365;67078417;67078417;67080097;67080139;67080654	+;+;+;+;+;+;+;+;+;+;+;+;+;+;+;+;+;+;+	3841	1.41379	0.619534	0.702975
E2f8	7;7;7;7;7;7;7;7;7;7;7;7;7;7;7;7;7;7;7;7;7;7;7;7;7;7;7;7;7;7;7	48866429;48866429;48867654;48867654;48868159;48868159;48870691;48870691;48871813;48871813;48872086;48872086;48872107;48873260;48873260;48873260;48874972;48874972;48874972;48875457;48875457;48877942;48877942;48878425;48878425;48878833;48880278;48880278;48880661;48880661;48881408	48867229;48867229;48868039;48868039;48868291;48868291;48871216;48871216;48871900;48871900;48872286;48872286;48872286;48873397;48873397;48873397;48875251;48875133;48875133;48875771;48875771;48878098;48878098;48878703;48878703;48880401;48880401;48880401;48881004;48881041;48881596	-;-;-;-;-;-;-;-;-;-;-;-;-;-;-;-;-;-;-;-;-;-;-;-;-;-;-;-;-;-;-	5443	12.5856	2.9411	5.75054
Ehhadh	16;16;16;16;16;16;16	21761287;21766226;21770416;21773495;21775345;21777799;21787707	21763336;21766567;21770520;21773606;21775511;21777902;21787844	-;-;-;-;-;-;-	3018	440.761	88.8421	111.834
Elovl3	19;19;19;19	46131897;46133124;46134001;46134375	46132173;46133255;46134152;46135307	+;+;+;+	1494	76.5759	1.61348	4.80365
Eps8l2	7;7;7;7;7;7;7;7;7;7;7;7;7;7;7;7;7;7;7;7;7;7;7;7;7;7;7;7;7;7;7;7;7;7;7;7;7;7;7;7;7;7;7;7;7;7;7;7;7;7;7;7;7;7;7;7;7;7;7;7;7;7;7;7;7;7;7;7;7;7;7;7;7;7;7;7;7;7;7;7;7;7;7;7;7;7;7;7;7;7	141338880;141338956;141338980;141338987;141339004;141339006;141340147;141341893;141341893;141341893;141341893;141341893;141341893;141342055;141342055;141342055;141342055;141342055;141342656;141342926;141342926;141342926;141342926;141342926;141342926;141343743;141350124;141354946;141354946;141354946;141354946;141354946;141354946;141355645;141355645;141355645;141355645;141355645;141355870;141355870…	141339058;141339058;141339058;141339058;141339058;141339058;141340185;141341974;141342110;141341974;141341974;141341974;141341974;141342110;141342110;141342110;141342110;141342110;141342990;141342990;141342990;141342990;141342990;141342990;141342990;141344502;141350306;141355107;141355107;141355021;141355107;141355107;141355107;141355794;141355792;141355794;141355794;141355794;141355929;141355949…	+;+;+;+;+;+;+;+;+;+;+;+;+;+;+;+;+;+;+;+;+;+;+;+;+;+;+;+;+;+;+;+;+;+;+;+;+;+;+;+;+;+;+;+;+;+;+;+;+;+;+;+;+;+;+;+;+;+;+;+;+;+;+;+;+;+;+;+;+;+;+;+;+;+;+;+;+;+;+;+;+;+;+;+;+;+;+;+;+;+	5377	15.7766	3.40252	7.59851
Fam89a	8;8	124740257;124751540	124741301;124751832	-;-	1338	2.4132	0.554337	0.849698
Fzd6	15;15;15;15;15;15;15;15;15;15;15;15;15;15	39006280;39006333;39007225;39007225;39025666;39025666;39030815;39030815;39033850;39033850;39034808;39034808;39036386;39036386	39006432;39006489;39007563;39007563;39025862;39025862;39031832;39031832;39033998;39033998;39035227;39035227;39038186;39038186	+;+;+;+;+;+;+;+;+;+;+;+;+;+	4134	1.77511	0.433587	0.515646
G0s2	1;1	193272161;193272989	193272802;193273217	-;-	871	139.521	21.6791	64.7132
Gadd45a	6;6;6;6;6;6;6;6;6;6;6;6;6;6;6;6;6;6;6;6	67035096;67035459;67035459;67035466;67035579;67036371;67036678;67036678;67036678;67036678;67036897;67037010;67037010;67037010;67037010;67037201;67037201;67037201;67037201;67037201	67035772;67035772;67035772;67035772;67035772;67036915;67036915;67037186;67036915;67036915;67037111;67037111;67037201;67037111;67037111;67037457;67037377;67037251;67037364;67037406	-;-;-;-;-;-;-;-;-;-;-;-;-;-;-;-;-;-;-;-	1764	6.65607	1.8921	2.7794
Gadd45b	10;10;10;10	80930091;80930448;80931029;80931533	80930359;80930549;80931251;80932204	+;+;+;+	1266	14.4042	3.24666	6.73517
Gale	4;4;4;4;4;4;4;4;4;4;4;4;4;4;4;4;4;4;4;4;4;4;4;4;4;4;4;4;4;4;4;4;4;4;4;4;4;4;4;4;4;4;4;4	135963727;135963757;135963760;135963817;135965165;135965195;135965226;135965334;135965334;135965334;135965566;135965566;135965566;135965566;135965566;135965619;135966003;135966003;135966003;135966003;135966003;135966254;135966370;135966370;135966370;135966370;135966813;135966813;135966813;135966813;135967012;135967012;135967012;135967171;135967171;135967171;135967352;135967352;135967352;135967589…	135963788;135963788;135963788;135964096;135965456;135965681;135965456;135965456;135965456;135965456;135965681;135965681;135965619;135965629;135965681;135965681;135966116;135966116;135966116;135966116;135966116;135966546;135966546;135966546;135966872;135966546;135966926;135966926;135966926;135966926;135967078;135967078;135967078;135967256;135967256;135967256;135967429;135967429;135967429;135967703…	+;+;+;+;+;+;+;+;+;+;+;+;+;+;+;+;+;+;+;+;+;+;+;+;+;+;+;+;+;+;+;+;+;+;+;+;+;+;+;+;+;+;+;+	2370	2.13647	0.938864	0.899443
Gem	4;4;4;4;4;4;4;4;4	11704457;11705807;11705905;11711139;11711139;11711970;11711970;11713476;11713476	11704566;11706241;11706241;11711215;11711215;11712174;11712174;11714752;11714752	+;+;+;+;+;+;+;+;+	2104	1.36024	0.52878	0.675437
Gm10653	9;9;9;9;9;9;9;9;9	62841477;62841477;62841513;62845401;62845401;62850621;62850621;62861910;62867886	62842358;62842358;62842347;62845454;62845454;62850801;62850801;62862024;62868000	-;-;-;-;-;-;-;-;-	1347	3.23224	0.986551	1.58254
Gm13528	2;2	33177902;33181569	33177998;33181881	+;+	410	14.1397	2.56279	5.37253
Gm14654	X	46361460	46361906	+	447	2.70878	0.737001	0.847268
Gm14964	19;19;19;19	6530711;6530789;6531745;6531849	6531263;6531263;6531788;6532011	-;-;-;-	760	4.10367	1.7892	1.12194
Gm15343	10;10;10;10	76564765;76568903;76569332;76570203	76564805;76569032;76569470;76570532	-;-;-;-	640	9.97553	4.15276	4.66305
Gm15401	6;6;6;6;6;6;6;6;6;6;6;6	72629288;72629831;72629837;72630051;72630051;72631111;72632650;72636253;72636322;72636322;72637079;72637079	72629352;72629886;72629886;72630145;72630145;72631257;72632958;72636539;72636539;72636483;72637717;72637366	+;+;+;+;+;+;+;+;+;+;+;+	1598	8.12818	0.618859	2.26775
Gm15611	5;5	8998402;8999459	8998596;8999669	-;-	406	8.40473	0.304476	0.962582
Gm16066	19;19;19	3798615;3803466;3852340	3799541;3803544;3852419	-;-;-	1086	1.6893	0.56914	0.71972
Gm18635	5	87014160	87015219	+	1060	3.87685	1.39944	1.60882
Gm2061	1;1;1	185447116;185454005;185455036	185449214;185454133;185455568	-;-;-	2761	3.88046	0.716361	1.54414
Gm2065	9	83114108	83116864	+	2757	5.24356	0.392329	0.87628
Gm21989	12;12;12;12;12;12;12;12;12;12	20990459;21042935;21044725;21076307;21084695;21085672;21168204;21185098;21199544;21200880	20990872;21043333;21044830;21076436;21084806;21085785;21168276;21185243;21199618;21200919	+;+;+;+;+;+;+;+;+;+	1609	1.00338	0.249693	0.375374
Gm22036	6	141915078	141915292	-	215	14.6766	6.03712	5.94888
Gm26813	1;1	59488480;59492246	59491706;59492605	-;-	3587	0.572827	0.0861563	0.0594279
Gm26885	17;17;17;17;17	29461896;29463176;29464549;29467210;29491177	29462147;29463656;29464655;29467308;29491925	-;-;-;-;-	1688	3.47788	0.659096	1.62065
Gm26917	17;17;17	39843013;39845074;39845444	39846341;39845140;39846245	+;+;+	3329	123.159	15.5543	31.6896
Gm26981	7;7	92729840;92732610	92731869;92733748	+;+	3169	0.578915	0.156033	0.134533
Gm2788	7;7;7;7;7;7;7;7;7;7;7;7;7;7;7;7;7;7;7;7;7;7;7;7;7;7;7;7;7;7;7;7;7;7	48877958;48877966;48877966;48878025;48878331;48878334;48880633;48881300;48884877;48885437;48885437;48885437;48887230;48898709;48898709;48898709;48898807;48899021;48899021;48899021;48906218;48906558;48907868;48907868;48907868;48907868;48909129;48909129;48909129;48909614;48909614;48909614;48909943;48909943	48878112;48878112;48878112;48878112;48878447;48878447;48880996;48881517;48885123;48886589;48886608;48885961;48887430;48898809;48898809;48898809;48899064;48899064;48899064;48899064;48906459;48906721;48907998;48908599;48907998;48907998;48909319;48909319;48909319;48913040;48909717;48909717;48910156;48910157	+;+;+;+;+;+;+;+;+;+;+;+;+;+;+;+;+;+;+;+;+;+;+;+;+;+;+;+;+;+;+;+;+;+	7586	8.91897	3.27538	4.32275
Gm28076	7;7;7;7	37137011;37137673;37139599;37140263	37137162;37137757;37139651;37140382	-;-;-;-	410	5.90645	2.56279	1.73307
Gm37691	1	193281271	193283843	+	2573	4.7344	0.720659	1.60173
Gm37969	6	72635147	72638555	-	3409	1.4315	0.090655	0.302233
Gm37973	3	79610538	79611826	-	1289	0.967816	0.191803	0.275625
Gm38155	1;1	187344970;187377445	187347707;187377469	-;-	2763	1.27484	0.425032	0.552915
Gm42669	5;5;5;5;5;5;5;5;5;5	107507621;107508944;107539130;107539130;107543920;107545688;107546201;107549085;107578514;107578905	107509122;107509122;107539223;107539223;107544013;107545856;107546279;107551549;107578670;107580596	+;+;+;+;+;+;+;+;+;+	6252	0.452835	0.138407	0.167639
Gm42900	5	107254338	107256504	-	2167	1.49001	0.0570453	0.661375
Gm43300	3	119727748	119729790	-	2043	1.47269	0.453807	0.730385
Gm43963	6	113676732	113679219	-	2488	1.09131	0.496853	0.456952
Gm44397	17	56172013	56172125	-	113	46.108	12.0335	22.0085
Gm44997	7;7;7;7;7;7	42561414;42573221;42576639;42576774;42577466;42578179	42561624;42576755;42576681;42576869;42577483;42578235	-;-;-;-;-;-	3917	0.374691	0.0946774	0.0907021
Gm45053	6	72603004	72605502	-	2499	104.349	31.4731	38.9401
Gm45281	7;7;7;7	15971883;15980743;15982253;15984485	15971970;15980938;15982486;15984654	+;+;+;+	688	3.73316	1.79676	1.44591
Gm45470	8;8;8;8;8;8;8	27228686;27232378;27234156;27235019;27235019;27238517;27238517	27234349;27232415;27234349;27235162;27235162;27239752;27240332	+;+;+;+;+;+;+	7624	6.165	2.87802	1.34209
Gm4952	19;19;19;19;19;19;19;19;19;19;19;19	12599974;12600016;12613466;12613466;12618326;12618326;12623604;12623604;12624543;12624543;12626714;12626714	12600089;12600183;12613561;12613561;12618433;12618433;12623730;12623730;12624717;12624717;12628251;12626873	+;+;+;+;+;+;+;+;+;+;+;+	2254	102.229	36.5943	42.5107
Gm7658	1	21511933	21513056	-	1124	2.05656	0.907332	0.821822
Gm7967	1;1;1;1;1;1;1;1;1	98589517;98589517;98589518;98597248;98605131;98605131;98605718;98606943;98606943	98594558;98589657;98589657;98597393;98605187;98605187;98605980;98607384;98607144	+;+;+;+;+;+;+;+;+	5950	0.789332	0.36358	0.119422
Gtf2ird1	5;5;5;5;5;5;5;5;5;5;5;5;5;5;5;5;5;5;5;5;5;5;5;5;5;5;5;5;5;5;5;5;5;5;5;5;5;5;5;5;5;5;5;5;5;5;5;5;5;5;5;5;5;5;5;5;5;5;5;5;5;5;5;5;5;5;5;5;5;5;5;5;5;5;5;5;5;5;5;5;5;5;5;5;5;5;5;5;5;5;5;5;5;5;5;5;5;5;5;5;5;5;5;5;5;5;5;5;5;5;5;5;5;5;5;5;5;5;5;5;5;5;5;5;5;5;5;5;5;5;5;5;5;5;5;5;5;5;5;5;5;5;5;5;5;5;5;5;5;5;5;5;5;5;5;5;5;5;5;5;5;5;5;5;5;5;5;5;5;5;5;5;5;5;5;5;5;5;5;5;5;5;5;5;5;5;5;5;5;5;5;5;5;5;5;5;5;5;5;5…	134357656;134357656;134357661;134357663;134357669;134357679;134357679;134357679;134357697;134357786;134358573;134358573;134358635;134358654;134358988;134358988;134358988;134358988;134358988;134358988;134358988;134358988;134358988;134360175;134360238;134360238;134360238;134360238;134360238;134360238;134360238;134360238;134360238;134360238;134360238;134360238;134360238;134360238;134360954;134360954…	134357896;134357896;134357896;134357896;134357896;134357896;134357896;134357896;134357896;134357896;134359118;134359118;134359118;134359118;134359118;134359118;134359118;134359118;134359118;134359118;134359118;134359118;134359118;134360275;134360275;134360275;134360275;134360275;134360275;134360275;134360275;134360275;134360275;134360275;134360275;134360275;134360275;134360275;134361146;134361140…	-;-;-;-;-;-;-;-;-;-;-;-;-;-;-;-;-;-;-;-;-;-;-;-;-;-;-;-;-;-;-;-;-;-;-;-;-;-;-;-;-;-;-;-;-;-;-;-;-;-;-;-;-;-;-;-;-;-;-;-;-;-;-;-;-;-;-;-;-;-;-;-;-;-;-;-;-;-;-;-;-;-;-;-;-;-;-;-;-;-;-;-;-;-;-;-;-;-;-;-;-;-;-;-;-;-;-;-;-;-;-;-;-;-;-;-;-;-;-;-;-;-;-;-;-;-;-;-;-;-;-;-;-;-;-;-;-;-;-;-;-;-;-;-;-;-;-;-;-;-;-;-;-;-;-;-;-;-;-;-;-;-;-;-;-;-;-;-;-;-;-;-;-;-;-;-;-;-;-;-;-;-;-;-;-;-;-;-;-;-;-;-;-;-;-;-;-;-;-;-…	7594	3.5878	0.956999	1.73177
Hamp	7;7;7	30942368;30942665;30943897	30942581;30942724;30944032	-;-;-	410	1439.47	253.792	610.302
Hes1	16;16;16;16;16;16;16;16;16;16;16	30064384;30064645;30065340;30065535;30065831;30066097;30066163;30066338;30066872;30066872;30066872	30064536;30064789;30065698;30065569;30065926;30066250;30066250;30066542;30067123;30067796;30067319	+;+;+;+;+;+;+;+;+;+;+	2037	8.75411	3.50461	3.4185
Hmgn3	9;9;9;9;9;9;9;9;9;9;9;9;9;9;9;9;9;9;9;9;9;9;9;9;9;9;9;9;9;9;9;9;9;9;9;9;9;9;9	83109948;83109948;83109948;83109948;83109948;83109968;83110181;83110378;83110720;83110775;83110788;83110832;83110993;83110993;83110993;83111034;83111034;83111034;83112220;83112220;83112220;83112220;83112220;83112220;83114773;83114773;83114773;83114773;83114773;83120373;83120373;83120373;83120373;83120373;83146431;83146431;83146431;83146431;83146431	83110429;83110429;83111106;83110429;83110429;83110429;83110429;83110429;83110874;83110825;83110874;83111106;83111093;83111106;83111106;83111131;83111106;83111106;83112568;83112270;83112270;83112270;83112270;83112270;83114802;83114802;83114802;83114802;83114802;83120423;83120423;83120423;83120423;83120423;83146517;83146685;83146605;83146530;83146470	-;-;-;-;-;-;-;-;-;-;-;-;-;-;-;-;-;-;-;-;-;-;-;-;-;-;-;-;-;-;-;-;-;-;-;-;-;-;-	1869	4.41713	0.462985	1.15956
Hnf4aos	2;2;2;2;2;2;2;2;2;2	163493807;163493807;163494194;163496567;163496567;163496567;163496735;163541503;163541503;163541503	163494158;163494158;163494308;163496631;163496631;163496631;163496938;163541692;163541720;163541720	-;-;-;-;-;-;-;-;-;-	954	2.76918	0.907044	1.04275
Hsd3b7	7;7;7;7;7;7;7;7;7;7;7;7;7;7;7;7;7;7;7;7;7;7;7;7;7;7;7;7;7;7;7;7;7;7;7;7;7;7;7;7;7;7;7;7;7;7;7;7;7;7;7;7;7;7;7;7;7;7;7;7;7;7;7;7	127800604;127800604;127800604;127800614;127800614;127800636;127800646;127800647;127800658;127800671;127800680;127800916;127800941;127801052;127801075;127801075;127801075;127801075;127801075;127801075;127801075;127801075;127801127;127801127;127801127;127801392;127801461;127801461;127801461;127801461;127801461;127801461;127801461;127801461;127801461;127801834;127801834;127801834;127801834;127801834…	127800714;127800714;127800714;127800714;127800714;127800714;127800714;127800714;127800714;127800714;127800714;127801246;127801050;127801246;127801616;127801363;127801246;127801246;127801246;127801246;127801246;127801246;127801246;127801363;127801246;127801616;127801518;127801616;127801616;127801616;127801616;127801616;127801616;127801616;127801616;127801942;127802113;127801942;127802223;127802113…	+;+;+;+;+;+;+;+;+;+;+;+;+;+;+;+;+;+;+;+;+;+;+;+;+;+;+;+;+;+;+;+;+;+;+;+;+;+;+;+;+;+;+;+;+;+;+;+;+;+;+;+;+;+;+;+;+;+;+;+;+;+;+;+	2769	38.5269	11.0938	17.2123
Hunk	16;16;16;16;16;16;16;16;16;16;16	90386397;90432514;90447310;90453680;90464141;90472444;90475820;90481250;90487859;90493413;90496090	90386716;90432806;90447365;90453815;90464268;90472579;90475982;90481333;90487906;90493593;90499553	+;+;+;+;+;+;+;+;+;+;+	5009	1.64083	0.475071	0.695098
Id1	2;2;2	152736251;152736251;152736972	152736745;152737410;152737410	+;+;+	1160	13.7277	3.67654	5.02293
Id4	13;13;13	48261427;48262285;48262952	48261938;48262347;48264036	+;+;+	1660	2.71872	0.632979	1.15573
Ighd	12;12;12;12;12;12;12;12;12	113406604;113407764;113409552;113414272;113414272;113415562;113415562;113416043;113416043	113407543;113407921;113409645;113414592;113414592;113415666;113415666;113416324;113416324	-;-;-;-;-;-;-;-;-	1900	1.04281	0.130123	0.224387
Ikzf4	10;10;10;10;10;10;10;10;10;10;10;10;10;10;10;10;10;10;10;10;10;10;10;10;10;10;10;10;10;10;10;10;10;10;10;10;10;10;10;10;10;10;10;10;10	128630843;128632415;128632469;128633714;128634097;128635790;128635790;128635790;128635790;128636641;128636641;128636641;128636641;128640141;128640141;128640141;128640141;128640261;128641053;128641053;128641053;128641053;128641053;128641177;128641203;128642629;128642629;128642629;128642629;128642629;128642629;128642629;128643694;128643875;128643875;128643875;128643875;128644438;128645721;128645721…	128634811;128632896;128634811;128634811;128634811;128635921;128635921;128635921;128635921;128636790;128636790;128636790;128636790;128640308;128640308;128640308;128640308;128640308;128641313;128641313;128641313;128641313;128641313;128641299;128641313;128642793;128642733;128642793;128642733;128642733;128642733;128642733;128643765;128644648;128643968;128643968;128643968;128644681;128645807;128645826…	-;-;-;-;-;-;-;-;-;-;-;-;-;-;-;-;-;-;-;-;-;-;-;-;-;-;-;-;-;-;-;-;-;-;-;-;-;-;-;-;-;-;-;-;-	5995	0.318259	0.0721701	0.106673
Insc	7;7;7;7;7;7;7;7;7;7;7;7;7;7;7;7;7;7;7;7;7;7;7;7;7;7;7;7;7;7;7;7;7;7;7;7;7;7;7;7;7;7;7;7;7;7;7;7;7;7;7;7	114743694;114745740;114745766;114753721;114768736;114768774;114768932;114768932;114768932;114768932;114768932;114771321;114771980;114790952;114790952;114790952;114790952;114790952;114790952;114792053;114792246;114792246;114793968;114793970;114793970;114793970;114804479;114804479;114804479;114804479;114811603;114811603;114811603;114829034;114829034;114829034;114829034;114834753;114834753;114834753…	114743976;114746006;114746006;114753906;114768822;114769032;114769345;114769032;114769032;114769032;114769032;114771405;114772093;114791055;114791191;114791297;114791018;114791296;114791297;114792298;114792298;114792298;114794093;114794093;114794093;114794093;114804592;114804592;114804592;114804592;114811728;114811728;114811728;114829198;114829205;114829205;114829205;114834931;114834931;114834931…	+;+;+;+;+;+;+;+;+;+;+;+;+;+;+;+;+;+;+;+;+;+;+;+;+;+;+;+;+;+;+;+;+;+;+;+;+;+;+;+;+;+;+;+;+;+;+;+;+;+;+;+	3722	1.79416	0.548007	0.47727
Insig2	1;1;1;1;1;1;1;1;1;1;1;1;1;1;1;1;1;1;1;1;1;1;1;1;1;1;1;1;1;1;1;1;1;1;1;1;1;1;1;1;1;1;1;1;1;1;1;1;1;1;1;1;1	121304353;121305522;121305538;121305555;121305695;121305893;121305924;121306864;121306864;121306864;121306864;121306864;121306864;121306880;121306937;121307140;121307140;121307140;121307140;121307140;121307140;121307140;121307237;121311845;121312201;121312201;121312201;121312201;121312201;121312201;121312201;121319597;121319597;121319597;121319597;121319597;121319597;121319597;121319629;121319664…	121305947;121305947;121305947;121305947;121305947;121305947;121305947;121306963;121306963;121306963;121306963;121306963;121306963;121306963;121306963;121307306;121307306;121307318;121307306;121307306;121307306;121307306;121307306;121312325;121312325;121312414;121312325;121312325;121312325;121312325;121312325;121319728;121319972;121319905;121319905;121319972;121319972;121319972;121319972;121319905…	-;-;-;-;-;-;-;-;-;-;-;-;-;-;-;-;-;-;-;-;-;-;-;-;-;-;-;-;-;-;-;-;-;-;-;-;-;-;-;-;-;-;-;-;-;-;-;-;-;-;-;-;-	3473	102.956	21.7033	35.4564
Itgb2l	16;16;16;16;16;16;16;16;16;16;16;16;16;16;16;16;16;16;16;16;16;16;16;16;16;16;16;16;16;16;16;16;16;16;16;16;16;16;16;16;16;16;16;16;16;16;16;16;16;16	96422288;96422292;96422376;96422957;96422957;96424903;96424903;96424903;96426049;96426049;96426049;96426729;96426729;96426729;96426730;96427674;96427674;96427674;96427674;96428969;96428969;96428969;96428969;96430566;96430566;96430566;96432580;96432580;96432580;96433477;96433477;96433477;96434585;96434585;96434585;96435620;96435620;96435620;96437270;96437270;96437270;96438464;96438464;96438464;964…	96422688;96422688;96423118;96423118;96423118;96425096;96425096;96425096;96426268;96426225;96426268;96426973;96426973;96426973;96426973;96427861;96427861;96427861;96427861;96429144;96429109;96429109;96429109;96430655;96430655;96430655;96432675;96432675;96432675;96433632;96433632;96433632;96434742;96434742;96434742;96435790;96435790;96435790;96437450;96437450;96437450;96438552;96438552;96438552;964…	-;-;-;-;-;-;-;-;-;-;-;-;-;-;-;-;-;-;-;-;-;-;-;-;-;-;-;-;-;-;-;-;-;-;-;-;-;-;-;-;-;-;-;-;-;-;-;-;-;-	2936	1.92456	0.631559	0.629243
KIAA1683	8;8;8;8	70703457;70707619;70708130;70716602	70703497;70707743;70711498;70717650	+;+;+;+	4584	0.33618	0.0134835	0.0620035
Kbtbd12	6;6;6;6;6;6;6;6;6;6;6;6;6;6;6;6;6;6;6;6;6	88545114;88545120;88586526;88586780;88586780;88611291;88611291;88613751;88613894;88614030;88614094;88617436;88617783;88617783;88618367;88618367;88618617;88627397;88627397;88627397;88637646	88547915;88547915;88590659;88586977;88586977;88611441;88611441;88614164;88614164;88614164;88614164;88618958;88618958;88618958;88618522;88618501;88618958;88627445;88627448;88627442;88637950	-;-;-;-;-;-;-;-;-;-;-;-;-;-;-;-;-;-;-;-;-	9381	0.179918	0.065887	0.0605957
Kcnk1	8;8;8;8;8;8;8	125995170;125995436;126025012;126025012;126029492;126029492;126030351	125995814;125995814;126025407;126025407;126029692;126030685;126030683	+;+;+;+;+;+;+	2235	0.591006	0.0553097	0.0635848
Klhdc8a	1;1;1;1;1	132298626;132302525;132302940;132303729;132304599	132299652;132302689;132303155;132303830;132307357	+;+;+;+;+	4269	0.618832	0.0144785	0.133157
Lrfn3	7;7;7	30355489;30359384;30361933	30356103;30360814;30362772	-;-;-	2886	3.33098	0.257	1.32953
Mab21l2	3;3	86545581;86546050	86548283;86548629	-;-	3049	0.818311	0.141902	0.0466094
Mapk15	15;15;15;15;15;15;15;15;15;15;15;15;15;15;15;15;15;15;15;15;15;15;15;15;15;15;15;15;15;15;15;15;15	75993769;75993769;75994845;75994845;75995072;75995072;75995234;75995234;75995786;75995827;75995939;75996041;75996375;75996713;75997111;75997111;75997111;75997570;75997570;75997570;75997828;75997828;75998059;75998059;75998059;75998371;75998371;75998371;75998550;75998550;75998550;75998779;75998779	75993928;75993928;75994943;75994943;75995101;75995101;75995324;75995324;75995824;75995957;75996514;75996204;75996514;75996952;75997168;75997168;75997168;75997707;75997707;75997707;75997933;75997933;75998263;75998259;75998263;75998474;75998474;75998474;75998678;75999152;75998678;75999152;75999152	+;+;+;+;+;+;+;+;+;+;+;+;+;+;+;+;+;+;+;+;+;+;+;+;+;+;+;+;+;+;+;+;+	2561	11.9201	1.76182	5.18839
Micalcl	7;7;7;7;7;7;7;7;7;7;7;7;7;7;7;7;7;7;7;7;7;7;7;7;7;7;7;7;7;7;7;7;7;7;7;7;7	112368308;112374345;112374868;112376015;112376015;112376015;112380283;112380283;112380283;112380956;112380956;112380956;112381149;112391266;112391266;112391266;112391266;112394794;112394794;112394794;112394794;112395082;112397472;112397472;112397472;112407108;112407557;112407560;112407560;112411390;112411390;112411390;112411390;112412803;112412803;112412803;112412803	112368458;112374653;112374932;112376089;112376089;112376089;112380428;112380428;112380428;112382237;112382237;112382237;112382237;112391357;112391357;112391357;112391357;112394874;112394874;112394874;112394874;112395355;112397565;112397565;112397565;112407659;112407659;112407659;112407659;112411463;112411463;112411463;112411463;112413053;112413102;112413102;112413106	+;+;+;+;+;+;+;+;+;+;+;+;+;+;+;+;+;+;+;+;+;+;+;+;+;+;+;+;+;+;+;+;+;+;+;+;+	3499	0.744528	0.256137	0.294459
Mir22hg	11;11;11;11;11	75461539;75461644;75463693;75463693;75465307	75461755;75461755;75464029;75463857;75466676	+;+;+;+;+	1924	92.1516	43.7649	40.0643
Mir671	5	24592114	24592211	+	98	14.0402	4.09955	3.26278
Mthfr	4;4;4;4;4;4;4;4;4;4;4;4;4;4;4;4;4;4;4;4;4;4;4;4;4;4;4;4;4;4;4;4;4;4;4;4;4;4;4;4;4;4;4;4;4;4;4;4;4;4;4;4	148039077;148039159;148040810;148041191;148041287;148041584;148041584;148041584;148041584;148041602;148043425;148043425;148043425;148043425;148043425;148043425;148044444;148044444;148044444;148044444;148048073;148048073;148048073;148051372;148051372;148051372;148051865;148051865;148051865;148052099;148052099;148052099;148052514;148052514;148052514;148052678;148053580;148053580;148053580;148053580…	148039132;148039409;148041829;148041321;148041321;148041829;148041829;148041829;148041829;148041829;148043956;148043663;148043663;148043663;148043448;148043663;148044554;148044554;148044554;148044554;148048266;148048266;148048266;148051622;148051622;148051622;148051999;148051999;148051999;148052279;148052279;148052279;148052696;148052696;148052696;148052696;148053681;148053681;148053681;148053681…	+;+;+;+;+;+;+;+;+;+;+;+;+;+;+;+;+;+;+;+;+;+;+;+;+;+;+;+;+;+;+;+;+;+;+;+;+;+;+;+;+;+;+;+;+;+;+;+;+;+;+;+	7315	3.1784	0.354882	0.650821
Mtnr1a	8;8;8;8;8;8;8	45069137;45069374;45085167;45085554;45087197;45087197;45087197	45069402;45069402;45085641;45085641;45087356;45088390;45088506	+;+;+;+;+;+;+	2051	3.47059	0.180815	0.779503
Mup11	4;4;4;4;4;4;4;4;4;4;4;4;4;4;4;4	60658466;60658984;60659397;60659508;60659595;60659717;60659717;60659717;60660160;60660160;60660160;60660888;60660888;60661730;60662202;60662202	60658718;60659553;60659553;60659553;60659818;60659738;60659818;60659818;60660237;60660270;60660270;60660961;60660961;60661863;60662358;60662411	-;-;-;-;-;-;-;-;-;-;-;-;-;-;-;-	1576	4.77969	1.74288	2.36388
Mup7	4;4;4;4;4;4;4;4;4;4;4;4;4;4;4;4;4;4;4	60066469;60066470;60067510;60067510;60067720;60067720;60067721;60068165;60068165;60068165;60068901;60068901;60068901;60069733;60069733;60069733;60070205;60070205;60070205	60066722;60066722;60067555;60067596;60067821;60067821;60067821;60068275;60068275;60068275;60068971;60068974;60068974;60069866;60069866;60069866;60070411;60070411;60070475	-;-;-;-;-;-;-;-;-;-;-;-;-;-;-;-;-;-;-	1033	367.878	69.9891	177.269
Mup8	4;4;4;4;4;4;4;4;4;4;4;4;4;4	60218621;60218622;60219662;60219662;60219872;60219872;60220316;60220316;60221060;60221060;60221902;60221902;60222374;60222374	60218872;60218872;60219707;60219748;60219973;60219973;60220426;60220426;60221133;60221133;60222035;60222035;60222580;60222599	-;-;-;-;-;-;-;-;-;-;-;-;-;-	986	20.5257	6.58455	8.70544
Myl6b	10;10;10;10;10;10;10	128494157;128494590;128495054;128496253;128496614;128497201;128498628	128494483;128494667;128495227;128496396;128496641;128497417;128498685	-;-;-;-;-;-;-	1026	2.50333	0.843392	1.03883
Nav2	7;7;7;7;7;7;7;7;7;7;7;7;7;7;7;7;7;7;7;7;7;7;7;7;7;7;7;7;7;7;7;7;7;7;7;7;7;7;7;7;7;7;7;7;7;7;7;7;7;7;7;7;7;7;7;7;7;7;7;7;7;7;7;7;7;7;7;7;7;7;7;7;7;7;7;7;7;7;7;7;7;7;7;7;7;7;7;7;7;7;7;7;7;7;7;7;7;7;7;7;7;7;7;7;7;7;7;7;7;7;7;7;7;7;7;7;7;7;7;7;7;7;7;7;7;7;7;7;7;7;7;7;7;7;7;7;7;7;7;7;7;7;7;7;7;7;7;7;7;7;7;7;7;7;7;7;7;7;7;7;7;7;7;7;7;7;7;7;7;7;7;7;7;7;7;7;7	48908716;48909129;48909614;48947703;48959073;48959097;48963798;48963798;48963798;49246189;49246189;49246844;49246845;49304138;49304252;49304254;49343474;49362098;49362098;49362098;49362098;49362098;49362098;49362098;49364721;49372317;49372317;49372317;49372317;49372317;49372317;49372317;49372317;49372317;49398083;49398083;49398083;49398083;49398083;49398083;49398083;49398083;49398083;49408633;494…	48908745;48909319;48909717;48947833;48959177;48959177;48967836;48964440;48963824;49247198;49247198;49247198;49247198;49304558;49304558;49305917;49343628;49362215;49362215;49362215;49362215;49362215;49362215;49362215;49365133;49372369;49372369;49372369;49372369;49372369;49372369;49372369;49372369;49372369;49398155;49398155;49398155;49398155;49398155;49398155;49398155;49398155;49398155;49408906;494…	+;+;+;+;+;+;+;+;+;+;+;+;+;+;+;+;+;+;+;+;+;+;+;+;+;+;+;+;+;+;+;+;+;+;+;+;+;+;+;+;+;+;+;+;+;+;+;+;+;+;+;+;+;+;+;+;+;+;+;+;+;+;+;+;+;+;+;+;+;+;+;+;+;+;+;+;+;+;+;+;+;+;+;+;+;+;+;+;+;+;+;+;+;+;+;+;+;+;+;+;+;+;+;+;+;+;+;+;+;+;+;+;+;+;+;+;+;+;+;+;+;+;+;+;+;+;+;+;+;+;+;+;+;+;+;+;+;+;+;+;+;+;+;+;+;+;+;+;+;+;+;+;+;+;+;+;+;+;+;+;+;+;+;+;+;+;+;+;+;+;+;+;+;+;+;+;+	32228	1.40719	0.636727	0.550095
Nckap5	1;1;1;1;1;1;1;1;1;1;1;1;1;1;1;1;1;1;1;1;1;1;1;1;1;1;1;1;1;1;1;1;1;1;1;1;1;1;1;1;1;1;1;1;1;1;1;1;1;1;1;1;1;1;1;1;1;1;1;1;1;1;1;1;1;1;1;1;1;1;1;1;1;1;1;1;1;1;1;1;1;1;1;1;1;1;1;1;1;1;1;1;1;1;1;1;1;1;1	125913620;125913637;125913637;125913648;125914319;125914743;125914960;125940163;125965148;125976926;125976926;125976926;125976926;125981383;125981383;125981383;125981383;125981383;125981383;126014571;126014571;126014571;126014571;126014571;126014571;126023033;126023033;126023033;126023033;126024276;126024276;126024276;126027877;126033773;126033773;126033773;126034838;126102544;126102544;126102544…	125915021;125915021;125915021;125915021;125915021;125915021;125915021;125940237;125965200;125977062;125977062;125977062;125977062;125981697;125981697;125981697;125981697;125981697;125981697;126014649;126014649;126014649;126014649;126014649;126014649;126023103;126023210;126023210;126023210;126028015;126028015;126028015;126028015;126033964;126033964;126033964;126035125;126102663;126102663;126102663…	-;-;-;-;-;-;-;-;-;-;-;-;-;-;-;-;-;-;-;-;-;-;-;-;-;-;-;-;-;-;-;-;-;-;-;-;-;-;-;-;-;-;-;-;-;-;-;-;-;-;-;-;-;-;-;-;-;-;-;-;-;-;-;-;-;-;-;-;-;-;-;-;-;-;-;-;-;-;-;-;-;-;-;-;-;-;-;-;-;-;-;-;-;-;-;-;-;-;-	12100	0.473049	0.0817303	0.0528516
Npas2	1;1;1;1;1;1;1;1;1;1;1;1;1;1;1;1;1;1;1;1;1;1;1;1;1;1	39193731;39194212;39263319;39263319;39287468;39287468;39292687;39300644;39311841;39312955;39324440;39325296;39326088;39328307;39330937;39333810;39334703;39335995;39338053;39341555;39345269;39345269;39347491;39348432;39359649;39361855	39194009;39194742;39263375;39263375;39287616;39287615;39292778;39300733;39311961;39313068;39324558;39325378;39326194;39328454;39331021;39333951;39334812;39336096;39338199;39341830;39345466;39345466;39347681;39348524;39359823;39363236	+;+;+;+;+;+;+;+;+;+;+;+;+;+;+;+;+;+;+;+;+;+;+;+;+;+	4791	0.405898	0.0258019	0.0593246
Npnt	3;3;3;3;3;3;3;3;3;3;3;3;3;3;3;3;3;3;3;3;3;3;3;3;3;3;3;3;3;3;3;3;3;3;3;3;3;3;3;3;3;3;3;3;3;3;3;3;3;3;3;3;3;3;3;3;3;3;3;3;3;3;3;3;3;3;3;3;3;3;3;3;3;3;3;3;3;3	132881745;132881745;132882683;132882699;132884430;132884430;132885756;132885756;132885756;132885756;132885756;132885756;132890764;132890764;132890764;132890764;132890764;132890764;132891176;132891402;132891402;132891402;132891402;132891402;132904658;132904658;132904658;132904658;132904658;132904658;132904658;132906347;132906347;132906347;132906347;132906347;132906347;132906347;132906695;132906695…	132884513;132884513;132884513;132884513;132884513;132884513;132886012;132886012;132886012;132886012;132886012;132886012;132890862;132890862;132890862;132890862;132890862;132890862;132891488;132891488;132891488;132891488;132891488;132891488;132905053;132905053;132905053;132905053;132905053;132905053;132905053;132906359;132906469;132906469;132906469;132906469;132906469;132906469;132906829;132906829…	-;-;-;-;-;-;-;-;-;-;-;-;-;-;-;-;-;-;-;-;-;-;-;-;-;-;-;-;-;-;-;-;-;-;-;-;-;-;-;-;-;-;-;-;-;-;-;-;-;-;-;-;-;-;-;-;-;-;-;-;-;-;-;-;-;-;-;-;-;-;-;-;-;-;-;-;-;-	5026	1.12426	0.0245955	0.409993
Nt5dc2	14;14;14;14;14;14;14;14;14;14;14;14;14	31134853;31135030;31135338;31135494;31135686;31135918;31136065;31136268;31136596;31138124;31138332;31138609;31138781	31134923;31135104;31135393;31135587;31135814;31135978;31136167;31136369;31136677;31138210;31138472;31138673;31139121	+;+;+;+;+;+;+;+;+;+;+;+;+	1407	4.64187	1.66931	2.12108
Ntrk2	13;13;13;13;13;13;13;13;13;13;13;13;13;13;13;13;13;13;13;13;13;13;13;13;13;13;13;13;13;13;13	58806596;58807900;58808385;58808385;58837796;58837796;58837985;58837985;58842876;58842876;58846700;58846700;58859169;58859169;58860146;58860146;58861250;58861250;58871736;58871736;58874328;58874328;58878163;58878163;58932023;58985802;59037967;59054293;59060228;59126433;59128168	58806852;58808013;58808940;58808940;58837870;58837870;58838056;58838056;58842944;58842944;58846854;58846854;58859305;58859305;58860278;58860278;58861555;58861555;58871771;58871771;58874425;58874425;58878262;58878262;58937030;58985990;59038097;59054465;59060462;59126591;59133970	+;+;+;+;+;+;+;+;+;+;+;+;+;+;+;+;+;+;+;+;+;+;+;+;+;+;+;+;+;+;+	13806	0.483694	0.134308	0.0514675
Nupr1	7;7;7;7;7;7;7;7;7;7;7;7;7;7;7;7;7;7	126623249;126623252;126623278;126623442;126624890;126624890;126624890;126624890;126624948;126624948;126625323;126625323;126625323;126625323;126625323;126625669;126625669;126630800	126623579;126623579;126623579;126623579;126625185;126625033;126627010;126625135;126625033;126625033;126625412;126625475;126625412;126625676;126625344;126625745;126626016;126630861	-;-;-;-;-;-;-;-;-;-;-;-;-;-;-;-;-;-	2514	0.700556	0.295029	0.226113
Obox4-ps3	7	14548714	14549233	+	520	2.68131	1.06976	0.409939
Pde4c	8;8;8;8;8;8;8;8;8;8;8;8;8;8;8;8;8;8;8;8;8;8;8;8;8;8;8;8;8;8;8;8;8;8;8;8;8;8;8;8;8;8;8;8;8;8;8;8;8;8;8;8;8;8;8;8	70723720;70724064;70724065;70724206;70724515;70724515;70724515;70726844;70726844;70726844;70730112;70743079;70745274;70745274;70745274;70745274;70745274;70745867;70745867;70745867;70745867;70745867;70745988;70745988;70745988;70745988;70746184;70746184;70746184;70746532;70746532;70746532;70746787;70746787;70747220;70747220;70747467;70747467;70747815;70747815;70747891;70748057;70748057;70748057;707…	70723783;70724217;70724217;70724368;70724567;70724567;70724567;70727049;70727049;70727049;70730284;70743249;70745465;70745465;70745465;70745465;70745465;70745903;70745893;70745903;70745903;70745903;70746058;70746058;70746058;70746046;70746236;70746236;70746236;70747979;70746644;70746644;70746880;70746880;70747380;70747380;70747565;70747565;70747979;70747979;70749405;70748156;70748156;70748156;707…	+;+;+;+;+;+;+;+;+;+;+;+;+;+;+;+;+;+;+;+;+;+;+;+;+;+;+;+;+;+;+;+;+;+;+;+;+;+;+;+;+;+;+;+;+;+;+;+;+;+;+;+;+;+;+;+	5545	6.35238	2.54145	2.87043
Peg3	7;7;7;7;7;7;7;7;7;7;7;7;7;7;7;7;7;7;7;7;7;7;7;7;7;7;7;7;7;7	6703892;6709395;6711696;6711851;6711851;6711851;6712673;6712673;6712673;6712950;6712950;6716054;6716054;6716054;6717113;6717113;6717113;6717799;6717799;6717799;6718426;6718426;6718426;6721933;6723187;6726490;6726490;6730258;6730258;6730258	6711731;6711731;6711731;6711943;6711943;6711943;6712775;6712775;6712775;6713012;6713012;6716157;6716157;6716157;6717196;6717196;6717196;6717888;6717888;6717888;6718556;6718556;6718556;6726574;6723215;6726574;6726574;6730431;6730419;6730421	-;-;-;-;-;-;-;-;-;-;-;-;-;-;-;-;-;-;-;-;-;-;-;-;-;-;-;-;-;-	13324	10.7205	1.99472	5.04496
Phospho1	11;11;11;11;11;11;11;11	95824499;95824500;95828666;95828666;95830433;95830551;95830763;95831528	95824709;95824709;95828775;95828775;95830701;95832140;95831291;95831592	+;+;+;+;+;+;+;+	2029	11.3384	3.28996	3.69463
Platr4	3;3;3;3;3;3	41484024;41487679;41488370;41488804;41493088;41493140	41484413;41489736;41488476;41489736;41493190;41493192	-;-;-;-;-;-	2553	0.776086	0.169471	0.347905
Plin2	4;4;4;4;4;4;4;4;4;4;4;4;4;4;4;4;4;4;4;4;4;4;4;4;4;4;4;4;4;4;4;4;4	86648386;86656565;86656907;86657114;86657156;86658100;86658581;86658581;86658581;86658581;86660088;86660121;86661934;86661934;86661934;86661934;86664429;86664429;86664429;86664429;86665687;86667665;86668367;86668367;86668367;86668650;86668650;86668650;86668650;86669446;86669701;86669945;86669945	86648579;86657404;86657404;86657404;86657404;86658172;86658644;86659148;86658683;86658715;86660269;86660269;86662213;86662213;86662213;86662213;86664511;86664511;86664511;86664511;86665725;86668562;86668562;86668562;86668562;86668705;86668705;86668705;86668705;86669560;86669768;86669986;86670060	-;-;-;-;-;-;-;-;-;-;-;-;-;-;-;-;-;-;-;-;-;-;-;-;-;-;-;-;-;-;-;-;-	3512	237.184	50.8588	106.422
Plin4	17;17;17;17;17;17;17;17;17;17;17;17;17;17;17;17;17;17	56100591;56100591;56102409;56102409;56103110;56103110;56103417;56103417;56106096;56106117;56108588;56108588;56109313;56109313;56109538;56109538;56109693;56109693	56102330;56102330;56102495;56102495;56103297;56103297;56105501;56105522;56107374;56107374;56108646;56108646;56109451;56109451;56109605;56109605;56109803;56109802	-;-;-;-;-;-;-;-;-;-;-;-;-;-;-;-;-;-	5777	5.532	2.09606	1.8788
Pmm1	15;15;15;15;15;15;15;15;15;15;15;15;15;15;15;15;15;15;15;15;15;15;15;15;15;15;15;15;15;15;15;15;15	81951108;81951108;81951402;81951444;81951547;81951924;81951924;81951924;81951924;81951924;81952725;81952725;81952725;81952725;81955554;81955649;81955649;81955649;81956169;81956169;81956169;81956362;81956362;81957341;81957793;81957793;81957863;81957896;81960715;81960715;81960715;81960715;81960715	81951612;81951612;81951612;81951612;81951612;81952264;81952039;81952039;81952039;81952039;81953504;81952800;81952800;81952800;81955748;81955691;81955748;81955748;81956260;81956260;81956260;81956438;81956438;81957910;81957910;81957910;81957910;81957910;81960764;81960833;81960842;81960930;81960869	-;-;-;-;-;-;-;-;-;-;-;-;-;-;-;-;-;-;-;-;-;-;-;-;-;-;-;-;-;-;-;-;-	2776	1.29531	0.289449	0.409545
Pnkd	1;1;1;1;1;1;1;1;1;1;1;1;1;1;1;1;1;1;1;1;1;1;1;1;1;1;1;1;1;1;1;1;1;1;1;1;1;1;1;1;1	74284930;74285045;74285050;74285054;74285055;74285777;74285842;74285842;74285842;74285842;74285842;74287092;74287092;74287092;74332610;74332663;74347385;74347385;74347385;74347385;74347652;74347652;74347652;74348763;74348763;74348763;74349308;74349308;74349308;74349714;74349714;74349714;74350617;74350617;74350617;74351537;74351537;74351537;74351758;74351758;74351758	74285137;74285137;74285137;74285137;74285137;74286010;74286010;74286634;74286010;74286010;74286010;74287273;74287208;74287454;74332791;74336261;74347500;74347500;74347566;74347500;74347764;74347764;74347764;74348821;74348821;74348821;74349400;74349400;74349400;74349877;74349877;74349877;74350703;74350703;74350703;74351652;74351652;74351652;74353686;74353694;74353684	+;+;+;+;+;+;+;+;+;+;+;+;+;+;+;+;+;+;+;+;+;+;+;+;+;+;+;+;+;+;+;+;+;+;+;+;+;+;+;+;+	7832	14.2841	4.02482	6.74996
Ppp1r3c	19;19	36731737;36736553	36734354;36736653	-;-	2719	61.535	18.0152	18.1103
R3hdml	2;2;2;2;2	163492318;163495689;163498295;163499815;163502322	163492752;163495807;163498427;163499930;163502612	+;+;+;+;+	1094	1.54279	0.112996	0.584556
RP23-13G1.8	9;9;9	83098224;83098693;83105850	83098242;83098776;83106330	+;+;+	584	6.53412	1.58755	1.46006
RP23-330G24.3	X	152294828	152296304	-	1477	3.05556	1.25542	1.39514
RP23-386F15.2	7;7;7;7;7;7;7;7;7;7;7;7;7;7;7;7;7;7;7;7;7;7;7;7;7;7;7	112349394;112349394;112351325;112351325;112353899;112364963;112364963;112368280;112368280;112376015;112376015;112380283;112380283;112380956;112380956;112391266;112391266;112394794;112394794;112397472;112397472;112407560;112407560;112411390;112411390;112412803;112412803	112349482;112349482;112351427;112351427;112353954;112365143;112365143;112368458;112368458;112376089;112376089;112380428;112380428;112382237;112382237;112391357;112391357;112394874;112394874;112397565;112397565;112407659;112407659;112411463;112411463;112412987;112412987	+;+;+;+;+;+;+;+;+;+;+;+;+;+;+;+;+;+;+;+;+;+;+;+;+;+;+	2737	1.43442	0.530691	0.558167
Rab36	10;10;10;10;10;10;10;10;10;10;10;10;10;10;10;10;10;10;10;10;10;10;10;10;10;10;10;10;10;10;10;10;10;10;10;10;10;10;10;10;10;10;10;10;10;10;10;10;10;10;10;10;10;10;10;10;10;10;10;10;10	75037058;75037066;75037084;75037226;75037273;75037322;75037836;75038223;75038358;75038427;75038433;75038440;75038440;75041840;75041840;75041840;75041840;75041840;75041840;75041840;75041840;75044471;75044471;75044471;75044471;75044471;75044471;75044471;75044471;75046032;75046032;75046032;75046032;75046032;75046032;75046032;75048449;75048449;75048449;75048449;75048449;75048449;75049852;75049896;750…	75037321;75037321;75037321;75038520;75037321;75037483;75038520;75038520;75038520;75038520;75038520;75038520;75038520;75041931;75041931;75041931;75041931;75041931;75041931;75041931;75041931;75044536;75044536;75044536;75044536;75044536;75044536;75044536;75044536;75046133;75046133;75047572;75046094;75046133;75046133;75046133;75048513;75048513;75048513;75048513;75048513;75048788;75049951;75049951;750…	+;+;+;+;+;+;+;+;+;+;+;+;+;+;+;+;+;+;+;+;+;+;+;+;+;+;+;+;+;+;+;+;+;+;+;+;+;+;+;+;+;+;+;+;+;+;+;+;+;+;+;+;+;+;+;+;+;+;+;+;+	6175	1.58056	0.47545	0.379733
Raet1e	10;10;10;10;10;10;10;10;10;10;10;10;10;10;10;10;10;10;10;10;10;10;10;10;10;10;10;10;10	22158569;22165638;22171709;22172004;22172004;22173181;22173181;22173521;22173876;22173876;22173876;22173919;22174293;22174293;22174293;22174293;22180618;22180618;22180618;22180618;22181125;22181125;22181125;22181946;22181946;22181946;22183555;22183555;22373777	22158718;22165761;22171785;22172101;22172101;22173250;22173250;22173536;22173966;22173966;22173966;22173966;22174410;22174410;22174410;22174410;22180872;22180726;22180872;22180872;22181388;22181388;22181388;22182115;22182115;22182115;22183914;22183917;22374139	+;+;+;+;+;+;+;+;+;+;+;+;+;+;+;+;+;+;+;+;+;+;+;+;+;+;+;+;+	2159	3.5519	0.949602	1.08049
Retsat	6;6;6;6;6;6;6;6;6;6;6;6;6;6;6;6;6;6;6;6;6;6;6;6;6;6;6;6;6;6;6;6;6;6;6;6;6;6;6	72598475;72598628;72598628;72600973;72601476;72601476;72602655;72602655;72603654;72603654;72603654;72604373;72604866;72604866;72604866;72604866;72605972;72605972;72605972;72605972;72605972;72606385;72606385;72606385;72606385;72606385;72606573;72606573;72606573;72606573;72606645;72606874;72606874;72606874;72606874;72607242;72607242;72607242;72607242	72598796;72598796;72598796;72601155;72601717;72601717;72602856;72602856;72603851;72603851;72603851;72604704;72604985;72604985;72604985;72604985;72606110;72606110;72606110;72606110;72606110;72606494;72606494;72606389;72606494;72606494;72606739;72606739;72606739;72606739;72606739;72607211;72607033;72607033;72607033;72607442;72607381;72607381;72608425	+;+;+;+;+;+;+;+;+;+;+;+;+;+;+;+;+;+;+;+;+;+;+;+;+;+;+;+;+;+;+;+;+;+;+;+;+;+;+	3537	346.864	102.962	114.826
Rfx4	10;10;10;10;10;10;10;10;10;10;10;10;10;10;10;10;10;10;10;10;10;10;10;10;10;10;10;10;10;10;10;10;10;10;10;10;10;10;10;10;10;10;10;10;10;10;10;10;10;10;10;10;10;10;10;10;10;10;10;10;10;10;10;10;10	84756062;84762238;84762238;84780015;84780015;84780015;84798528;84798528;84798528;84814636;84814636;84814636;84834746;84835293;84835293;84838148;84838148;84840017;84840017;84840017;84840017;84840839;84840839;84840839;84840839;84844201;84844201;84844201;84844201;84858497;84858497;84858497;84858497;84860498;84860498;84860498;84860498;84863243;84863243;84863243;84863243;84868352;84868352;84868352;848…	84756513;84762324;84762385;84780101;84780101;84780101;84798588;84798588;84798588;84814670;84814670;84814759;84834877;84835354;84835354;84838279;84838279;84840230;84840230;84840230;84840230;84840916;84840916;84840916;84840916;84844364;84844364;84844364;84844364;84858597;84858597;84858597;84858597;84860556;84860556;84860556;84860556;84863387;84863387;84863387;84863387;84868446;84868446;84868446;848…	+;+;+;+;+;+;+;+;+;+;+;+;+;+;+;+;+;+;+;+;+;+;+;+;+;+;+;+;+;+;+;+;+;+;+;+;+;+;+;+;+;+;+;+;+;+;+;+;+;+;+;+;+;+;+;+;+;+;+;+;+;+;+;+;+	4724	0.71457	0.143923	0.150415
Sall2	14;14;14;14	52311172;52311172;52316043;52328103	52315663;52315663;52316323;52328762	-;-;-;-	5433	0.864444	0.204777	0.366201
Selenbp2	3;3;3;3;3;3;3;3;3;3;3;3;3;3;3;3;3;3;3;3;3;3;3;3;3;3;3;3;3;3;3;3;3;3;3;3;3;3;3;3;3;3;3;3;3;3;3;3;3;3;3;3	94693556;94693566;94693568;94693569;94693647;94693648;94693659;94696794;94696794;94696794;94696794;94696794;94696794;94696992;94696992;94696992;94696992;94697040;94697305;94697305;94697305;94697305;94697305;94698043;94698043;94698043;94698043;94698043;94698043;94699530;94699530;94699530;94699530;94699530;94699938;94699938;94699938;94702320;94702320;94702320;94702481;94702481;94702481;94703487;947…	94693662;94693662;94693662;94693662;94693662;94693662;94693662;94696850;94696850;94696850;94696850;94696850;94696850;94697104;94697104;94697104;94697104;94697104;94697490;94697490;94698163;94697490;94697490;94698132;94698163;94698163;94698125;94698163;94698163;94699712;94699712;94699712;94699583;94699712;94699973;94700116;94700116;94702398;94702398;94702398;94702602;94702602;94702602;94703579;947…	+;+;+;+;+;+;+;+;+;+;+;+;+;+;+;+;+;+;+;+;+;+;+;+;+;+;+;+;+;+;+;+;+;+;+;+;+;+;+;+;+;+;+;+;+;+;+;+;+;+;+;+	2271	20.0342	7.12173	3.97895
43352	#N/A	#N/A	#N/A	#N/A	#N/A	7.78939	3.0026	3.68195
Serpine2	1;1;1;1;1;1;1;1;1;1;1;1;1;1;1;1;1;1;1;1;1;1;1;1;1	79794197;79796826;79796845;79799468;79799468;79801456;79801456;79802847;79802847;79803035;79810554;79810554;79810554;79815108;79816728;79816728;79816912;79821277;79821277;79821277;79821277;79857507;79858511;79858511;79861077	79795042;79796909;79796909;79799554;79799554;79801556;79801556;79803045;79803045;79803045;79810751;79810751;79810751;79816955;79816955;79816955;79820304;79821557;79821557;79821322;79821557;79858635;79858696;79858696;79861180	-;-;-;-;-;-;-;-;-;-;-;-;-;-;-;-;-;-;-;-;-;-;-;-;-	8287	1.52753	0.156628	0.531613
Sertad4	1;1;1;1;1;1;1;1;1;1;1;1;1;1;1;1	192844488;192844489;192847063;192849751;192849751;192849751;192850952;192850952;192850952;192851693;192851693;192854202;192854639;192854885;192855443;192855443	192847215;192847215;192847215;192849866;192849866;192849866;192851143;192851143;192851143;192851747;192851747;192854322;192854786;192855060;192855486;192855756	-;-;-;-;-;-;-;-;-;-;-;-;-;-;-;-	3850	0.686181	0.0481625	0.295298
Sgk2	2;2;2;2;2;2;2;2;2;2;2;2;2;2;2;2;2;2;2;2;2;2;2;2;2;2;2;2;2;2;2	162987330;162987502;162991415;162991415;162992941;162992941;162993890;162993890;162994465;162994465;162994670;162994670;162995687;162995687;162997834;162997834;162998112;162998230;162998230;162999182;163003272;163003272;163003272;163004147;163004147;163004147;163006794;163006794;163006794;163012910;163012910	162987595;162988196;162991660;162991660;162993000;162993000;162993939;162993939;162994522;162994522;162994753;162994753;162995818;162995818;162997946;162997946;162998266;162998266;162998266;162999268;163003367;163003367;163003367;163004302;163004302;163004302;163006833;163006883;163006883;163014126;163014127	+;+;+;+;+;+;+;+;+;+;+;+;+;+;+;+;+;+;+;+;+;+;+;+;+;+;+;+;+;+;+	3412	17.421	3.78605	7.14309
Slc30a10	1;1;1;1	185454848;185456352;185462687;185464077	185455679;185456429;185462926;185468762	+;+;+;+	5836	12.4862	2.52064	5.14718
Slc35f1	10;10;10;10;10;10;10;10	52690533;52933092;53021844;53062451;53073454;53077897;53089338;53108148	52691169;52933267;53021971;53062610;53073610;53077949;53089492;53111622	+;+;+;+;+;+;+;+	4941	1.67826	0.0125093	0.0575236
Slc6a21	7;7;7;7;7;7;7;7;7;7;7;7;7;7;7;7;7;7;7;7;7;7;7;7;7;7;7;7;7;7;7	45277513;45279859;45280257;45280498;45280714;45282428;45282489;45282726;45282726;45282740;45282776;45282873;45284550;45286442;45286442;45286442;45286442;45286882;45286882;45286882;45287136;45287208;45287208;45287208;45287692;45287692;45287692;45287692;45288072;45288072;45288131	45277617;45280133;45280414;45280624;45280892;45282541;45282541;45282967;45282967;45282967;45282967;45282967;45285263;45286628;45286628;45286658;45286628;45287083;45287083;45287083;45287367;45287367;45287367;45287367;45287857;45288998;45287857;45287857;45288993;45288994;45288581	+;+;+;+;+;+;+;+;+;+;+;+;+;+;+;+;+;+;+;+;+;+;+;+;+;+;+;+;+;+;+	3872	0.549616	0.0718333	0.220215
Slc6a4	11;11;11;11;11;11;11;11;11;11;11;11;11;11;11;11;11;11;11;11;11;11;11;11;11;11;11;11;11;11;11;11;11;11;11	76998603;76998616;77001607;77009274;77010332;77010332;77010332;77012921;77012921;77012921;77013199;77013199;77015073;77015073;77016629;77016629;77016984;77016984;77018177;77018240;77018240;77019125;77019125;77019842;77019842;77019842;77021391;77021391;77021391;77023175;77023175;77027084;77027084;77031603;77031603	76998675;76998675;77001665;77009331;77010783;77010783;77010783;77013053;77013055;77013055;77013418;77013418;77015211;77015211;77016763;77016763;77017087;77017087;77019237;77018367;77018367;77019237;77019237;77019973;77019973;77019973;77022346;77021490;77021490;77023275;77023275;77027251;77027251;77032340;77032339	+;+;+;+;+;+;+;+;+;+;+;+;+;+;+;+;+;+;+;+;+;+;+;+;+;+;+;+;+;+;+;+;+;+;+	4531	0.372504	0.054565	0.14114
Smarcd3	5;5;5;5;5;5;5;5;5;5;5;5;5;5;5;5;5;5;5;5;5;5;5;5;5;5;5;5;5;5;5;5;5;5;5;5;5;5;5;5;5;5;5;5;5;5;5;5;5;5;5;5;5;5;5;5;5;5;5;5;5;5;5;5	24590818;24592622;24592622;24593017;24593017;24593225;24593225;24593225;24593637;24593637;24593637;24593922;24593922;24593922;24594695;24594832;24594832;24594832;24595143;24595143;24595143;24595143;24595164;24595390;24595390;24595390;24595390;24595390;24595723;24595723;24595723;24595723;24595735;24595746;24595867;24595952;24595952;24595952;24595952;24595952;24595952;24595952;24596807;24596807;245…	24593118;24592804;24592804;24593118;24593118;24593347;24593347;24593347;24593772;24593772;24593831;24594019;24594019;24594019;24594993;24594993;24594993;24594993;24595244;24595244;24595244;24595244;24595244;24595845;24595485;24595485;24595485;24595485;24595845;24595845;24595845;24595845;24595845;24595845;24596074;24596074;24596074;24596074;24596074;24596074;24596074;24596074;24596989;24596849;245…	-;-;-;-;-;-;-;-;-;-;-;-;-;-;-;-;-;-;-;-;-;-;-;-;-;-;-;-;-;-;-;-;-;-;-;-;-;-;-;-;-;-;-;-;-;-;-;-;-;-;-;-;-;-;-;-;-;-;-;-;-;-;-;-	5120	3.16035	1.02008	1.49884
Snai1	2;2;2	167538195;167538671;167541899	167538371;167539198;167542814	+;+;+	1621	0.950677	0.381299	0.306843
Sp5	2;2	70474923;70476024	70475316;70477729	+;+	2100	0.943499	0.323759	0.236853
Spata22	11;11;11;11;11;11;11;11;11;11;11;11;11;11;11;11;11;11;11	73329741;73329741;73331088;73331088;73333298;73333298;73336010;73336010;73336195;73336195;73340251;73340251;73343737;73343737;73344646;73344646;73345755;73345755;73353739	73329775;73329775;73331194;73331194;73333426;73333426;73336070;73336070;73336290;73336290;73340584;73340584;73343860;73343860;73344743;73344743;73345795;73346044;73355913	+;+;+;+;+;+;+;+;+;+;+;+;+;+;+;+;+;+;+	3449	1.9149	0.50178	0.721067
Spon2	5;5;5;5;5;5;5;5;5;5;5;5;5;5;5;5;5;5;5;5;5;5	33198184;33200475;33213927;33213934;33213935;33214288;33215549;33215549;33215549;33215549;33216333;33216333;33216429;33216597;33216597;33217244;33217244;33217244;33217573;33217948;33217948;33217948	33198560;33200602;33214652;33214652;33214652;33214652;33215960;33215723;33215949;33215723;33216820;33216524;33216524;33216820;33216820;33217463;33217463;33217463;33217660;33218195;33218455;33218185	-;-;-;-;-;-;-;-;-;-;-;-;-;-;-;-;-;-;-;-;-;-	2947	3.68535	0.503361	0.988564
St5	7;7;7;7;7;7;7;7;7;7;7;7;7;7;7;7;7;7;7;7;7;7;7;7;7;7;7;7;7;7;7;7;7;7;7;7;7;7;7;7;7;7;7;7;7;7;7;7;7;7;7;7;7;7;7;7;7;7;7;7;7;7;7;7;7;7;7;7;7;7;7;7;7;7;7;7;7;7;7;7;7;7;7;7;7;7;7;7;7;7;7;7;7;7;7;7;7;7;7;7;7;7;7;7;7;7;7	109523911;109523911;109523920;109523920;109524059;109525263;109525263;109525263;109525263;109525539;109525539;109525539;109525539;109526226;109526226;109526226;109526226;109527344;109527344;109527344;109527344;109527614;109527614;109527614;109527614;109531082;109531082;109531082;109531082;109534634;109534634;109534634;109534634;109535294;109535294;109535294;109535294;109537747;109538276;109538276…	109524680;109524680;109524680;109524680;109524530;109525349;109525349;109525349;109525349;109525778;109525778;109525778;109525778;109526337;109526337;109526337;109526337;109527385;109527385;109527385;109527385;109527791;109527791;109527791;109527791;109531230;109531230;109531230;109531230;109534774;109534774;109534774;109534774;109535371;109535371;109535371;109535371;109538345;109538345;109538345…	-;-;-;-;-;-;-;-;-;-;-;-;-;-;-;-;-;-;-;-;-;-;-;-;-;-;-;-;-;-;-;-;-;-;-;-;-;-;-;-;-;-;-;-;-;-;-;-;-;-;-;-;-;-;-;-;-;-;-;-;-;-;-;-;-;-;-;-;-;-;-;-;-;-;-;-;-;-;-;-;-;-;-;-;-;-;-;-;-;-;-;-;-;-;-;-;-;-;-;-;-;-;-;-;-;-;-	5738	5.67831	1.72349	2.30331
Stx1b	7;7;7;7;7;7;7;7;7;7;7;7;7;7	127803900;127807372;127807656;127807847;127807847;127810655;127810655;127810900;127810900;127811163;127814913;127815064;127815346;127824260	127807389;127807766;127807766;127807984;127807984;127810728;127810728;127810924;127811008;127811236;127814987;127815163;127815420;127824549	-;-;-;-;-;-;-;-;-;-;-;-;-;-	4802	2.29609	0.373271	0.517901
Tlr5	1;1;1;1;1;1;1;1;1;1;1;1;1;1;1;1	182954788;182954788;182954822;182954828;182957946;182969014;182969014;182969014;182969014;182969686;182969710;182972177;182972371;182972371;182973171;182973171	182954882;182954882;182954882;182954882;182958069;182969141;182969141;182969141;182969141;182970260;182970024;182975994;182972472;182972472;182975692;182976044	+;+;+;+;+;+;+;+;+;+;+;+;+;+;+;+	4790	3.70746	1.48392	1.29058
Tnfrsf18	4;4;4;4;4;4;4;4;4;4;4;4;4;4;4;4;4;4;4;4;4;4;4;4	156026164;156026332;156026342;156026342;156026378;156027316;156027316;156027316;156027316;156027316;156027962;156027962;156027962;156027962;156027962;156028221;156028221;156028221;156028368;156028495;156028495;156028495;156028495;156028807	156026537;156026537;156026537;156026537;156026630;156027438;156027438;156027438;156027438;156027438;156028049;156028049;156028423;156028049;156028049;156028371;156028891;156028423;156028423;156028677;156028891;156028891;156028895;156028895	+;+;+;+;+;+;+;+;+;+;+;+;+;+;+;+;+;+;+;+;+;+;+;+	1524	1.22787	0.202784	0.466247
Tox2	2;2;2;2;2;2;2;2;2;2;2;2;2;2;2;2;2;2;2;2;2;2;2;2;2;2;2;2;2;2;2;2;2	163203125;163204553;163225363;163225454;163247767;163247767;163247767;163247767;163275969;163275969;163275969;163275969;163314322;163314322;163314322;163315795;163315795;163315795;163319562;163319562;163319562;163320298;163320298;163320298;163320378;163321421;163321421;163321421;163321421;163322744;163322744;163322944;163322944	163203262;163204781;163225587;163225587;163247832;163247832;163247832;163247832;163276214;163276098;163276214;163276214;163314561;163314561;163314561;163316022;163316022;163316022;163319642;163319642;163319642;163320690;163320690;163320690;163320690;163321548;163321548;163321548;163321548;163323302;163324170;163323102;163323102	+;+;+;+;+;+;+;+;+;+;+;+;+;+;+;+;+;+;+;+;+;+;+;+;+;+;+;+;+;+;+;+;+	3401	0.453116	0.145389	0.0835707
Tpm3-rs7	14	113314608	113316713	+	2106	5.92362	1.40874	1.51829
Trim43b	9;9;9;9;9;9;9;9;9;9;9;9;9;9	89084624;89084912;89087529;89087529;89088299;89088299;89089361;89089361;89090593;89090593;89091268;89091268;89092536;89092536	89085716;89085716;89087629;89087629;89088321;89088321;89089591;89089594;89090688;89090688;89091682;89091682;89092690;89092835	-;-;-;-;-;-;-;-;-;-;-;-;-;-	2262	1.03814	0.136624	0.188478
Trim43c	9;9;9;9;9;9;9;9;9;9;9;9;9;9	88839164;88839309;88840299;88840299;88841834;88841834;88842934;88842937;88844206;88844206;88844886;88844886;88847370;88847370	88839463;88839463;88840713;88840713;88841929;88841929;88843167;88843167;88844228;88844228;88844986;88844986;88848184;88848190	+;+;+;+;+;+;+;+;+;+;+;+;+;+	1990	0.64533	0.124238	0.196386
Trim6	7;7;7;7;7;7;7;7;7;7;7;7;7;7;7;7;7;7;7;7;7;7;7;7;7;7;7	104218793;104218795;104218837;104219429;104221172;104221216;104225507;104225507;104225507;104225507;104225507;104225507;104225885;104226809;104226809;104226809;104226809;104228146;104228146;104230728;104230728;104231789;104231789;104232113;104232113;104232367;104232367	104218883;104218883;104218883;104219537;104221298;104221298;104225806;104225933;104225896;104225980;104225980;104225980;104225980;104226904;104226829;104226904;104227733;104228376;104228376;104230750;104230750;104231889;104231889;104232139;104232139;104232998;104235152	+;+;+;+;+;+;+;+;+;+;+;+;+;+;+;+;+;+;+;+;+;+;+;+;+;+;+	4894	3.57619	1.11139	1.6842
Tsc22d1	14;14;14;14;14;14;14;14;14;14;14;14;14;14;14;14;14;14;14;14;14;14;14;14;14;14;14;14;14;14;14;14;14;14;14;14;14;14;14;14;14;14;14;14;14;14;14	76414961;76415587;76415917;76416114;76416308;76417236;76418354;76418648;76418651;76418828;76418966;76437666;76437766;76438933;76438936;76438936;76438947;76438947;76438964;76439956;76439956;76439956;76439956;76439956;76476917;76487759;76488436;76504214;76504478;76504530;76505098;76505249;76505249;76505249;76505249;76505249;76505249;76505249;76505249;76506417;76506417;76506417;76506417;76506417;765…	76415717;76419009;76416989;76416215;76416643;76419009;76418602;76419009;76419009;76419009;76419009;76437815;76437815;76439108;76439108;76439108;76439108;76439108;76438999;76440340;76440382;76440412;76440382;76441628;76477023;76487924;76488675;76504293;76504841;76504841;76505297;76505297;76505737;76505297;76505297;76505297;76505297;76505297;76505297;76507002;76507765;76507170;76506930;76506998;765…	+;+;+;+;+;+;+;+;+;+;+;+;+;+;+;+;+;+;+;+;+;+;+;+;+;+;+;+;+;+;+;+;+;+;+;+;+;+;+;+;+;+;+;+;+;+;+	8994	7.52272	3.11654	3.17595
Tspyl5	15	33683876	33687883	-	4008	0.659131	0.0154213	0.0531856
Tuba4a	1;1;1;1;1;1;1;1;1;1;1;1;1;1;1;1;1;1;1;1;1;1;1;1;1	75214228;75214972;75215612;75215956;75216435;75216827;75216827;75216827;75216857;75216889;75216913;75217212;75217212;75217212;75217212;75217212;75217212;75217212;75217212;75218536;75218790;75218829;75219193;75219193;75219426	75216593;75216593;75216593;75216448;75216975;75216975;75216975;75216975;75216975;75216975;75216975;75217434;75217434;75217434;75217414;75217434;75217434;75217434;75217434;75218624;75218888;75218888;75219243;75219294;75219865	-;-;-;-;-;-;-;-;-;-;-;-;-;-;-;-;-;-;-;-;-;-;-;-;-	3701	24.7056	10.7718	12.0187
Tubb2a	13;13;13;13	34074301;34076178;34076549;34077873	34075528;34076288;34076657;34078008	-;-;-;-	1584	28.4568	5.71651	8.23155
Tubb4b	2;2;2;2;2;2	25222160;25223523;25223934;25224124;25224534;25224534	25223368;25224232;25224044;25224232;25224702;25224654	-;-;-;-;-;-	2088	37.1309	14.2385	15.2968
Tymp	15;15;15;15;15;15;15;15;15;15;15	89371931;89373423;89373683;89373932;89374251;89374757;89374996;89375502;89376239;89376577;89376985	89372465;89373602;89373823;89374162;89374413;89374875;89375125;89375600;89376441;89376757;89377039	-;-;-;-;-;-;-;-;-;-;-	2037	126.98	43.5269	62.4749
Wisp1	15;15;15;15;15;15;15;15;15;15;15;15;15;15;15;15;15	66891320;66891387;66891508;66906401;66906401;66906401;66909311;66912829;66912829;66912829;66917277;66917277;66917277;66919155;66919155;66919155;66919155	66891634;66891634;66891634;66906488;66906680;66906680;66909731;66913089;66913089;66913089;66917470;66917470;66917470;66919235;66920077;66923201;66919455	+;+;+;+;+;+;+;+;+;+;+;+;+;+;+;+;+	5518	0.186184	0.0392044	0.0128771
Zbtb7c	18;18;18;18;18;18;18;18	75820178;75900548;76011629;76059458;76136827;76136827;76145681;76145681	75820365;75900761;76011690;76059617;76138050;76138050;76146443;76148561	+;+;+;+;+;+;+;+	4729	0.279319	0.0653506	0.0901535
Zfp57	17;17;17;17;17;17;17;17;17;17;17;17;17;17;17;17;17;17;17;17;17;17;17;17;17;17;17;17;17;17;17;17;17;17;17;17;17;17;17;17;17;17;17;17;17;17;17;17;17;17	37001163;37002452;37002482;37002525;37002554;37002569;37002577;37002596;37002612;37002670;37003038;37003286;37003286;37003286;37003286;37003286;37003286;37003286;37003286;37003464;37003464;37003666;37004522;37004603;37004797;37004797;37004797;37004797;37004797;37004797;37004797;37006050;37006050;37006050;37006050;37006050;37006050;37006050;37006050;37006059;37006059;37006059;37009419;37009419;370…	37001340;37002777;37002600;37002777;37002759;37002777;37002777;37002777;37002777;37002777;37003315;37003315;37003315;37003692;37003315;37003315;37003315;37003315;37003315;37003517;37003814;37004903;37004903;37004903;37004903;37004903;37004903;37004903;37004903;37004903;37004903;37006194;37006248;37006194;37006066;37006194;37006194;37006081;37006194;37006194;37006194;37006194;37010632;37009715;370…	+;+;+;+;+;+;+;+;+;+;+;+;+;+;+;+;+;+;+;+;+;+;+;+;+;+;+;+;+;+;+;+;+;+;+;+;+;+;+;+;+;+;+;+;+;+;+;+;+;+	3786	0.445804	0.130604	0.0750724
