# Supplementary material for: Silicon dioxide nanoparticles induce insulin resistance through endoplasmic reticulum stress and generation of reactive oxygen species
Source: Part Fibre Toxicol. 2019 Nov 7;16:41. doi: 10.1186/s12989-019-0327-z (PMC6836410; doi:10.1186/s12989-019-0327-z)
Supplement: Supplementary file 3 — Additional file 3: Table S2. GO terms Table S1 (XLS 150 kb) [file 12989_2019_327_MOESM3_ESM.xls]

## Sheet: Gene Ontology
Table S2: Gene Ontology
Biological_Process
GO-ID	p-value	corr p-value	x	n	X	N	Description	Genes in test set
9987	1.5739e-32	4.2732e-29	292	8922	525	28942	cellular process	CYFIP2|SPON2|SPI1|SERPINE2|CERK|AQP8|IFIT1|MKI67|CLDN1|IKZF4|LGALS3|LGALS1|RASSF4|CREB3L2|NAMPT|INSC|C3AR1|TRIM24|CHAC1|TNS4|MFSD2A|GAMT|DYNC2H1|ENTPD1|PRKCB|SLC11A1|ACSL4|ANK2|MMD2|CLPX|DSG1C|RUNX1|CYP39A1|STX1B|SFRP1|PPP1R3C|DDIT3|RFX4|DDIT4|ACOT2|VOPP1|ACOT1|RPL26|ALPK1|ATP6V0D2|TSPYL5|RETSAT|FUT11|SDC3|SLC30A10|ACMSD|KLRK1|INPP5D|HMOX1|CD14|PPARGC1A|BANP|PMM1|GADD45B|GADD45A|SLC10A2|EIF2AK3|M…
2376	1.5763e-23	2.1399e-20	60	700	525	28942	immune system process	SPON2|CXCL9|SPI1|CLEC4N|ITGB2|ONECUT1|SLA|CXCL1|IFI30|C3AR1|CD36|CD34|APOBEC1|FCER1G|SYK|PRKCB|NFAM1|SLC11A1|SERPINB9|VAV1|RUNX1|FCGR1|TLR1|DCSTAMP|FCGR3|FCGR4|LY6D|IGHD|HCLS1|IRF8|LCP2|TLR7|TLR5|DOCK2|TLR4|TLR13|C1QB|C1QA|SELPLG|CHRNA4|WAS|OAS1A|CFP|PIRB|SAMHD1|CNN2|KLRK1|CLEC7A|CCL6|INPP5D|CD14|CCK|POU2F2|PSMB8|PSMB9|CXCL10|MARCO|PTPRC|BCL2|C1QC
50896	5.2581e-23	4.7586e-20	120	2530	525	28942	response to stimulus	SPON2|SERPINE2|CLEC4N|IFIT1|CREB3L2|C3AR1|LEPR|CHAC1|ENTPD1|SLC15A2|PRKCB|SLC11A1|CYBB|RUNX1|FCGR1|FCGR3|DDIT3|DDIT4|ACOT2|NUPR1|INSIG2|CHRNA4|LYZ2|FPR1|ILDR2|ADRB2|CFP|NPAS2|ACACA|CNN2|CLEC7A|INPP5D|HMOX1|CD14|CD163|HSPA5|GADD45A|EIF2AK3|MT2|SERPINA3G|POU2F2|SERPINA3H|SERPINA3I|SQLE|CXCL10|MARCO|ITGB2L|PTPRC|ID1|BCL2|LCN2|HAMP|NFE2L2|CDKN1A|ORM1|CXCL9|ITGB2|PCSK9|ATP2A1|CXCL1|BRCA1|CROT|ORM3|SER…
42221	3.7185e-22	2.5239e-19	73	1086	525	28942	response to chemical stimulus	ITGB2|PCSK9|ATP2A1|CXCL1|CROT|IFIT1|SERPINA7|ADRA1A|AACS|HERPUD1|CREB3L2|C3AR1|CHAC1|CD36|CCR3|APOBEC1|ABCC4|SLC15A2|FCER1G|PRKCB|TNNC1|SLC11A1|CYBB|AVPR1A|ADRA2A|RUNX1|TLR1|FCGR3|DDIT3|DDIT4|ACOT2|HCLS1|IRF8|TLR7|NUPR1|TLR5|DOCK2|PLCB2|TLR4|APCS|CHRNA4|FPR1|ILDR2|EGFR|ACACA|PTGS1|TYMP|CLEC7A|CCL6|HMOX1|CD14|ABCB1A|NQO1|PKLR|HSPA5|EIF2AK3|SYVN1|MT2|CCK|SERPINA3G|SERPINA3H|MAPK15|SERPINA3I|SQLE|CX…
6950	3.2705e-21	1.7759e-18	77	1243	525	28942	response to stress	SPON2|CDKN1A|ORM1|CXCL9|SERPINE2|CLEC4N|ITGB2|PCSK9|CXCL1|BRCA1|ORM3|ADRA1A|ORM2|HERPUD1|CREB3L2|CHAC1|CD36|SCD1|APOBEC1|ENTPD1|FCER1G|SYK|SLC11A1|SERPINB9|AVPR1A|ADRA2A|RUNX1|FCGR1|TLR1|HCK|FCGR3|DDIT3|DDIT4|TFEC|ACOT2|IRF8|TLR7|NUPR1|TLR5|TLR4|CD44|TLR13|C1QB|C1QA|INSIG2|LYZ2|SAA3|PTGER3|ADRB2|CFP|SAMHD1|PTGS1|CNN2|CLEC7A|HMOX1|CD14|P2RY12|NQO1|CD163|PKLR|HSPA5|GADD45A|EIF2AK3|SYVN1|CCK|CXCL10|…
48518	2.3465e-20	1.0618e-17	95	1852	525	28942	positive regulation of biological process	CDKN1A|SPI1|SERPINE2|ITGB2|ONECUT1|PCSK9|BRCA1|ADRA1A|AACS|SLC6A4|LGALS1|CREB3L2|NAMPT|C3AR1|LEPR|TRIM24|CD36|SCD1|TEAD1|CCR3|IL13RA1|VAV3|ABCC4|FCER1G|SYK|PRKCB|NFAM1|SLC11A1|SERPINB9|ETV1|AVPR1A|NPNT|VAV1|RUNX1|FCGR1|TLR1|FCGR3|SFRP1|TOX2|RAP2B|DDIT3|RFX4|IGHD|HCLS1|IRF8|TLR7|NUPR1|TLR5|DOCK2|TLR4|ALDH1A7|CD44|C1QB|C1QA|SMARCD3|PTGER3|ADRB2|HMGCR|CFP|AIF1|EGFR|NPAS2|PTGS1|ARNTL|SOCS2|CNN2|KLRK1…
6952	4.3201e-20	1.5016e-17	44	439	525	28942	defense response	C1QB|SPON2|C1QA|ORM1|CXCL9|CLEC4N|LYZ2|SAA3|ITGB2|PTGER3|CXCL1|CFP|ORM3|SAMHD1|ORM2|CLEC7A|CD14|CD36|SCD1|APOBEC1|CD163|FCER1G|SLC11A1|SERPINB9|CCK|FCGR1|TLR1|CXCL10|MARCO|HCK|FCGR3|ITGB2L|PTPRC|BCL2|IRF8|TLR7|NUPR1|TLR5|HAMP|TLR4|HSPA1B|CD44|TLR13|C1QC
65007	4.4246e-20	1.5016e-17	224	7118	525	28942	biological regulation	SPI1|SERPINE2|CERK|IFI30|CLDN1|IKZF4|LGALS1|RASSF4|CREB3L2|NAMPT|C3AR1|TRIM24|VSIG4|CMKLR1|GAMT|ENTPD1|PRKCB|SLC11A1|ACSL4|ANK2|RUNX1|STX1B|SFRP1|PPP1R3C|DDIT3|RFX4|DDIT4|VOPP1|RETSAT|FPR1|IQGAP1|CFP|KLRK1|INPP5D|HMOX1|CD14|PPARGC1A|RALGDS|BANP|GADD45B|GADD45A|FZD6|EIF2AK3|PARP14|ELL3|CCDC88C|ID1|SNAI1|ID4|GTF2IRD1|HAMP|ACVRL1|CDKN1A|ORM1|PPP1R10|PCSK9|BRCA1|ORM3|ORM2|AACS|SIGLECE|SLC6A4|HERPUD1|…
50789	2.5075e-18	7.2953e-16	210	6693	525	28942	regulation of biological process	SPI1|SERPINE2|CERK|IFI30|IKZF4|LGALS1|RASSF4|CREB3L2|NAMPT|C3AR1|TRIM24|VSIG4|CMKLR1|GAMT|PRKCB|SLC11A1|ACSL4|ANK2|RUNX1|STX1B|SFRP1|PPP1R3C|DDIT3|RFX4|DDIT4|VOPP1|FPR1|IQGAP1|CFP|KLRK1|INPP5D|HMOX1|CD14|PPARGC1A|RALGDS|BANP|GADD45B|GADD45A|FZD6|EIF2AK3|PARP14|ELL3|CCDC88C|ID1|SNAI1|ID4|GTF2IRD1|ACVRL1|CDKN1A|ORM1|PCSK9|BRCA1|ORM3|ORM2|AACS|SIGLECE|SLC6A4|HERPUD1|AKAP13|GNGT2|CD36|SCD1|TEAD1|CCR3…
8152	2.687e-18	7.2953e-16	205	6467	525	28942	metabolic process	ADAMDEC1|SPI1|CERK|IFI30|IKZF4|NSDHL|CREB3L2|NAMPT|TRIM24|CYP2C70|GAMT|DYNC2H1|ENTPD1|PRKCB|SLC11A1|ACSL4|CLPX|RUNX1|CYP39A1|SOAT1|PPP1R3C|DDIT3|RFX4|ACOT2|VOPP1|ACOT1|RPL26|ALPK1|ATP6V0D2|RETSAT|FUT11|CFP|ACMSD|CYB5R3|INPP5D|HMOX1|PPARGC1A|BANP|GSTM3|GSTM2|PMM1|GADD45B|EIF2AK3|MTHFR|PARP14|ELL3|SQLE|FASN|ID1|GTF2IRD1|ACVRL1|PPP1R10|GBE1|PCSK9|MYL6B|BRCA1|CROT|AACS|CTSS|CYP2C39|CYP2C38|B3GALT1|CD…
44281	5.4761e-18	1.3516e-15	75	1350	525	28942	small molecule metabolic process	GBE1|ONECUT1|PCSK9|ATP2A1|BRCA1|CROT|CYP46A1|AACS|HK3|NSDHL|DBP|NAMPT|LEPR|UPP2|CD36|SCD1|GAMT|APOBEC1|ENTPD1|SYK|CYP4A10|ELOVL3|URAD|PDE4C|ELOVL6|ACSL4|CYP4A14|CLPX|CYP39A1|SOAT1|PPP1R3C|EHHADH|ACOT2|ACOT1|SLC27A3|ATP6V0D2|ALDH1A7|LY6E|DGKH|IDI1|PFKFB3|RETSAT|INSIG2|RGS16|AKR1D1|GSTT3|HMGCR|ACACA|ACMSD|PTGS1|TYMP|CYB5R3|ZFP57|MTHFD1L|ABCB1A|GBP2|GBP3|FDPS|GGT7|PMM1|PKLR|ATP8B2|GOT1|MBD1|MTHFR|SQ…
48522	1.8832e-16	4.2608e-14	81	1638	525	28942	positive regulation of cellular process	CDKN1A|SPI1|SERPINE2|ITGB2|ONECUT1|PCSK9|BRCA1|ADRA1A|AACS|SLC6A4|LGALS1|CREB3L2|NAMPT|C3AR1|LEPR|TRIM24|CD36|SCD1|TEAD1|CCR3|IL13RA1|VAV3|ABCC4|FCER1G|SYK|PRKCB|NFAM1|SLC11A1|SERPINB9|ETV1|AVPR1A|NPNT|VAV1|FCGR1|TLR1|FCGR3|SFRP1|TOX2|RAP2B|DDIT3|RFX4|IGHD|HCLS1|IRF8|NUPR1|DOCK2|TLR4|ALDH1A7|CD44|SMARCD3|ADRB2|AIF1|EGFR|NPAS2|ARNTL|SOCS2|KLRK1|CLEC7A|INPP5D|HMOX1|HES1|PPARGC1A|WNT2|NTRK2|NQO1|FDP…
2682	3.6789e-16	7.6833e-14	36	372	525	28942	regulation of immune system process	C1QB|CD274|C1QA|CDKN1A|ORM1|CLEC12A|CFP|ORM3|ORM2|KLRK1|CLEC7A|INPP5D|C3AR1|HMOX1|VSIG4|CD36|IL13RA1|FCER1G|SYK|PRKCB|NFAM1|SLC11A1|CCK|FCGR1|CXCL10|FCGR3|SFRP1|PTPRC|IGHD|TLR7|TLR5|TLR4|SGK2|HSPA1B|CD44|C1QC
6629	9.9051e-16	1.9209e-13	49	703	525	28942	lipid metabolic process	CERK|PCSK9|BRCA1|CROT|CYP46A1|AACS|PITPNC1|NSDHL|DBP|LEPR|CD36|SCD1|SYK|CYP4A10|ELOVL3|ELOVL6|ACSL4|CYP4A14|CYP39A1|SOAT1|CYP21A1|EHHADH|ACOT2|ACOT1|SLC27A3|PLCB2|ALDH1A7|DGKH|IDI1|RETSAT|INSIG2|RGS16|AKR1D1|PLD4|HSD17B6|HMGCR|ACACA|PTGS1|CYB5R3|FDPS|HSD3B7|OSBPL5|SQLE|FABP5|FASN|PNPLA3|SAA1|SAA2|LPIN1
6954	1.2919e-15	2.3383e-13	28	225	525	28942	inflammatory response	C1QB|C1QA|ORM1|CXCL9|SAA3|ITGB2|PTGER3|CXCL1|CFP|ORM3|ORM2|CLEC7A|CD14|CD163|SLC11A1|SERPINB9|FCGR1|TLR1|CXCL10|FCGR3|ITGB2L|TLR7|NUPR1|TLR5|TLR4|CD44|TLR13|C1QC
50794	2.9325e-15	4.9761e-13	194	6368	525	28942	regulation of cellular process	SPI1|SERPINE2|CERK|IFI30|IKZF4|LGALS1|RASSF4|CREB3L2|NAMPT|C3AR1|TRIM24|VSIG4|CMKLR1|PRKCB|SLC11A1|ACSL4|ANK2|RUNX1|STX1B|SFRP1|PPP1R3C|DDIT3|RFX4|DDIT4|VOPP1|FPR1|IQGAP1|KLRK1|INPP5D|HMOX1|PPARGC1A|RALGDS|BANP|GADD45B|GADD45A|FZD6|EIF2AK3|PARP14|ELL3|CCDC88C|ID1|SNAI1|ID4|GTF2IRD1|ACVRL1|CDKN1A|PCSK9|BRCA1|AACS|SIGLECE|SLC6A4|HERPUD1|AKAP13|GNGT2|CD36|SCD1|TEAD1|CCR3|APOBEC1|VAV3|FCER1G|SYK|TSC2…
1775	6.6585e-15	1.0634e-12	29	259	525	28942	cell activation	SPI1|CHRNA4|ITGB2|ONECUT1|WAS|PIRB|EGFR|KLRK1|P2RY12|ENTPD1|FCER1G|SYK|PRKCB|NFAM1|SLC11A1|CCK|POU2F2|VAV1|TLR1|FCGR3|PTPRC|FCGR4|LY6D|BCL2|LCP2|TLR7|TLR5|DOCK2|TLR4
6955	1.4857e-14	2.241e-12	33	351	525	28942	immune response	C1QB|SPON2|C1QA|CXCL9|CLEC4N|OAS1A|CXCL1|CFP|PIRB|SAMHD1|CLEC7A|CCL6|INPP5D|CD14|APOBEC1|FCER1G|SLC11A1|SERPINB9|POU2F2|VAV1|FCGR1|TLR1|CXCL10|MARCO|FCGR3|PTPRC|IGHD|IRF8|TLR7|TLR5|TLR4|TLR13|C1QC
9607	4.9955e-14	7.1095e-12	31	322	525	28942	response to biotic stimulus	LYZ2|HERPUD1|CLEC7A|CREB3L2|CHAC1|CD14|CD36|SCD1|APOBEC1|FCER1G|PKLR|HSPA5|SLC11A1|EIF2AK3|SYVN1|SERPINB9|CCK|FCGR1|TLR1|HCK|PTPRC|DDIT3|LCN2|IRF8|TLR7|TLR5|HAMP|TLR4|HSPA1B|HSPA1A|NFE2L2
50776	5.2424e-14	7.1095e-12	26	221	525	28942	regulation of immune response	C1QB|C1QA|CLEC12A|CFP|KLRK1|CLEC7A|INPP5D|C3AR1|HMOX1|CD36|IL13RA1|FCER1G|SYK|PRKCB|NFAM1|SLC11A1|CCK|FCGR1|FCGR3|PTPRC|IGHD|TLR7|TLR5|TLR4|HSPA1B|C1QC
44238	5.499e-14	7.1095e-12	173	5586	525	28942	primary metabolic process	ADAMDEC1|SPI1|CERK|SLA|CYP46A1|IKZF4|NSDHL|SALL1|SALL2|CREB3L2|NAMPT|LEPR|TRIM24|GAMT|TLE4|DYNC2H1|ENTPD1|PRKCB|SLC11A1|USP2|ADAM11|ARID5B|ACSL4|CLPX|RUNX1|CYP39A1|SOAT1|PPP1R3C|DDIT3|RFX4|ACOT2|VOPP1|ACOT1|RPL26|SNRNP25|SLC27A3|ALPK1|ATP6V0D2|LY6E|DGKH|IDI1|PFKFB3|RETSAT|INSIG2|FUT11|GSTT3|PLD4|CFP|AK7|NPAS2|ACACA|CYB5R3|ZFP57|PPARGC1A|BANP|FDPS|GGT7|PMM1|ATP8B2|GOT1|OSBPL5|GADD45B|HSPA5|UBE2C|E…
9611	6.19e-14	7.6391e-12	33	369	525	28942	response to wounding	C1QB|C1QA|ORM1|CXCL9|SERPINE2|SAA3|ITGB2|PTGER3|CXCL1|CFP|ORM3|ORM2|CNN2|CLEC7A|CD14|P2RY12|CD163|ENTPD1|SLC11A1|SERPINB9|FCGR1|TLR1|CXCL10|FCGR3|ITGB2L|BCL2|TLR7|NUPR1|TLR5|TLR4|CD44|TLR13|C1QC
45321	2.0351e-13	2.4023e-11	26	234	525	28942	leukocyte activation	SPI1|CHRNA4|ITGB2|ONECUT1|WAS|PIRB|KLRK1|FCER1G|SYK|PRKCB|NFAM1|SLC11A1|CCK|POU2F2|VAV1|TLR1|FCGR3|PTPRC|FCGR4|LY6D|BCL2|LCP2|TLR7|TLR5|DOCK2|TLR4
2684	4.067e-13	4.449e-11	26	241	525	28942	positive regulation of immune system process	C1QB|C1QA|CDKN1A|CFP|KLRK1|CLEC7A|INPP5D|C3AR1|CD36|IL13RA1|FCER1G|SYK|PRKCB|NFAM1|SLC11A1|CCK|FCGR1|CXCL10|FCGR3|PTPRC|IGHD|TLR7|TLR5|TLR4|HSPA1B|C1QC
50778	4.0967e-13	4.449e-11	21	149	525	28942	positive regulation of immune response	C1QB|C1QA|FCER1G|SYK|PRKCB|NFAM1|SLC11A1|CCK|CFP|FCGR1|FCGR3|KLRK1|PTPRC|CLEC7A|C3AR1|TLR7|CD36|TLR5|TLR4|HSPA1B|C1QC
8202	5.2189e-13	5.4498e-11	22	168	525	28942	steroid metabolic process	IDI1|FDPS|HSD3B7|OSBPL5|INSIG2|AKR1D1|PCSK9|HSD17B6|HMGCR|CYP46A1|CYP39A1|SQLE|NSDHL|CYB5R3|DBP|SOAT1|CYP21A1|LEPR|SAA1|SAA2|CD36|SCD1
55114	8.1134e-13	8.1585e-11	42	638	525	28942	oxidation reduction	STEAP4|RETSAT|AKR1D1|SLA|HSD17B6|HMGCR|CYP46A1|CYP2C39|PTGS1|CYP2C38|LOXL2|NSDHL|CYB5R3|CYP2C55|ALDH1B1|ALDH3B1|HMOX1|CYP2C70|SCD1|PPARGC1A|NQO1|HSD3B7|BC089597|CYP4A10|DIO1|MTHFR|CYBB|FMO2|CYP4A14|PTGR1|CYP8B1|CYP39A1|SQLE|CYP2A5|P4HA1|CYP2A4|FASN|CYP21A1|EHHADH|PCYOX1L|CYP2G1|ALDH1A7
2253	1.3427e-12	1.3019e-10	17	95	525	28942	activation of immune response	C1QB|C1QA|FCER1G|SYK|PRKCB|NFAM1|CCK|CFP|KLRK1|PTPRC|CLEC7A|C3AR1|TLR7|CD36|TLR5|TLR4|C1QC
51179	1.4104e-12	1.3204e-10	100	2655	525	28942	localization	STEAP4|SERPINE2|AQP8|LY75|SLA|NIPAL1|RASSF4|CREB3L2|CHP2|SLC26A10|MFSD2A|DYNC2H1|SLC38A1|SLC15A2|PRKCB|SLC11A1|ARID5B|CYBB|ACSL4|ANK2|FCGR1|STX1B|FCGR3|RAB36|PPP1R3C|SLC9A9|RAB39|KCTD12|ABCG3|CLEC4F|ATP6V0D2|LY6E|CHRNA2|CHRNA4|ILDR2|SLC30A10|CLEC7A|SLC15A3|PLTP|ATP8B2|OSBPL5|SLC10A2|EIF2AK3|POU2F2|CXCL10|PTPRC|BCL2|LCN2|ABCD2|ITGB2|SNX10|MYL6B|SLC35F1|ATP2A1|CXCL1|CROT|PITPNC1|SLC6A4|AKAP13|DBP|C…
51239	1.5547e-12	1.407e-10	56	1072	525	28942	regulation of multicellular organismal process	SERPINE2|ITGB2|ATP2A1|ADRA1A|AKAP13|LGALS1|C3AR1|VSIG4|CD36|CCR3|GAMT|FCER1G|SYK|NFAM1|TNNC1|SLC11A1|AVPR1A|RUNX1|TLR1|FCGR3|SFRP1|TNNT3|IRF8|TLR7|TLR4|SGK2|HCN3|PTGER3|ADRB2|HMGCR|AIF1|EGFR|PTGS1|SOCS2|KLRK1|CLEC7A|INPP5D|HMOX1|HES1|CD14|WNT2|NTRK2|KCNJ10|HSPA5|EIF2AK3|CCK|CXCL10|PTPRC|MAFF|ID1|SNAI1|BCL2|ID4|CSPG5|HSPA1B|NFE2L2
19222	3.2764e-12	2.8695e-10	106	2933	525	28942	regulation of metabolic process	SPI1|SERPINE2|CERK|SLA|IFI30|IKZF4|SALL1|SALL2|BASP1|CREB3L2|LEPR|TRIM24|TLE4|CISH|PRKCB|SLC11A1|SPINK5|ARID5B|ACSL4|GEM|RUNX1|FCGR3|SFRP1|PPP1R3C|DDIT3|RFX4|VOPP1|INSIG2|ADRB2|NPAS2|CNN2|KLRK1|ZFP57|INPP5D|HMOX1|PPARGC1A|WNT2|BANP|FDPS|GADD45B|HSPA5|GADD45A|UBE2C|EIF2AK3|PARP14|POU2F2|ELL3|PTPRC|MAFF|CCDC88C|ID1|SNAI1|BCL2|LCN2|ID4|SP5|TAF4B|GTF2IRD1|NFE2L2|CDKN1A|ITGB2|ONECUT1|PCSK9|BRCA1|SLC6A…
8203	3.4405e-12	2.9191e-10	15	73	525	28942	cholesterol metabolic process	IDI1|FDPS|INSIG2|PCSK9|HMGCR|CYP46A1|CYP39A1|SQLE|NSDHL|CYB5R3|SOAT1|LEPR|SAA1|SAA2|CD36
10033	3.6096e-12	2.9697e-10	42	668	525	28942	response to organic substance	APCS|CHRNA4|ILDR2|PCSK9|ATP2A1|IFIT1|ADRA1A|AACS|ACACA|HERPUD1|CLEC7A|CREB3L2|HMOX1|CHAC1|CD14|CD36|APOBEC1|PKLR|HSPA5|SLC11A1|EIF2AK3|SYVN1|CCK|AVPR1A|SERPINA3G|SERPINA3H|MAPK15|SERPINA3I|ADRA2A|TLR1|SQLE|DDIT3|ID1|BCL2|HCLS1|IRF8|TLR5|LPIN1|TLR4|HSPA1B|HSPA1A|NFE2L2
48583	4.5817e-12	3.6586e-10	33	431	525	28942	regulation of response to stimulus	C1QB|C1QA|SERPINE2|CLEC12A|PTGER3|ADRB2|CFP|KLRK1|CLEC7A|INPP5D|C3AR1|TRIM24|HMOX1|CD36|IL13RA1|FCER1G|SYK|PRKCB|NFAM1|SLC11A1|CCK|FCGR1|CXCL10|FCGR3|SFRP1|PTPRC|IGHD|TLR7|TLR5|TLR4|HSPA1B|CD44|C1QC
48519	6.2681e-12	4.8623e-10	71	1624	525	28942	negative regulation of biological process	CDKN1A|SERPINE2|ONECUT1|IFI30|ADRA1A|IKZF4|RGS2|LGALS1|SALL2|BASP1|RGS1|TRIM24|VSIG4|CD36|SCD1|TLE4|FCER1G|CISH|DST|SLC11A1|SPINK5|PDE4C|SERPINB9|AVPR1A|SPTB|ADRA2A|GEM|SFRP1|RAP2B|DDIT3|DDIT4|IRF8|NUPR1|TLR4|SGK2|JDP2|CD44|CD274|INSIG2|RGS16|OAS1A|ADRB2|AIF1|EGFR|PTGS1|SOCS2|CNN2|ZFP57|CUX2|BAG3|INPP5D|HMOX1|HES1|VILL|HSPA5|GADD45A|TMEM132A|EIF2AK3|SYVN1|CCK|MAPK15|PER2|CXCL10|PTPRC|PER3|AXL|ID1…
44237	9.9542e-12	7.5071e-10	161	5370	525	28942	cellular metabolic process	SPI1|CERK|SLA|IKZF4|SALL1|SALL2|CREB3L2|NAMPT|TRIM24|GAMT|TLE4|ENTPD1|PRKCB|SLC11A1|USP2|ARID5B|CYBB|ACSL4|CLPX|RUNX1|CYP39A1|PPP1R3C|DDIT3|RFX4|ACOT2|VOPP1|ACOT1|RPL26|SNRNP25|SLC27A3|ALPK1|ATP6V0D2|LY6E|DGKH|IDI1|PFKFB3|RETSAT|INSIG2|FUT11|GSTT3|AK7|NPAS2|ACACA|ACMSD|ZFP57|INPP5D|ALDH3B1|HMOX1|PPARGC1A|BANP|FDPS|GGT7|PMM1|ATP8B2|GOT1|GADD45B|HSPA5|UBE2C|EIF2AK3|MTHFR|PARP14|POU2F2|ELL3|SQLE|PTP…
16125	1.3974e-11	1.0254e-09	15	80	525	28942	sterol metabolic process	IDI1|FDPS|INSIG2|PCSK9|HMGCR|CYP46A1|CYP39A1|SQLE|NSDHL|CYB5R3|SOAT1|LEPR|SAA1|SAA2|CD36
48584	3.0883e-11	2.2065e-09	23	226	525	28942	positive regulation of response to stimulus	C1QB|C1QA|FCER1G|SYK|PRKCB|NFAM1|SLC11A1|PTGER3|CCK|CFP|FCGR1|CXCL10|FCGR3|KLRK1|PTPRC|CLEC7A|C3AR1|TLR7|CD36|TLR5|TLR4|HSPA1B|C1QC
32787	4.4247e-11	3.0803e-09	26	296	525	28942	monocarboxylic acid metabolic process	AKR1D1|BRCA1|CROT|AACS|ACACA|PTGS1|MTHFD1L|CD36|SCD1|PKLR|SYK|CYP4A10|ELOVL3|MTHFR|ELOVL6|ACSL4|CYP4A14|CYP39A1|P4HA1|FASN|EHHADH|ACOT2|ACOT1|SLC27A3|LPIN1|ALDH1A7
2526	4.8837e-11	3.3148e-09	14	73	525	28942	acute inflammatory response	C1QB|C1QA|CD163|ORM1|SAA3|PTGER3|SERPINB9|CFP|ORM3|ORM2|FCGR1|FCGR3|NUPR1|C1QC
2757	5.8975e-11	3.9053e-09	13	61	525	28942	immune response-activating signal transduction	FCER1G|SYK|PRKCB|NFAM1|CCK|KLRK1|PTPRC|CLEC7A|C3AR1|TLR7|CD36|TLR5|TLR4
45087	6.551e-11	4.2347e-09	17	120	525	28942	innate immune response	C1QB|SPON2|C1QA|CLEC4N|SLC11A1|CFP|SAMHD1|FCGR1|TLR1|MARCO|CLEC7A|TLR7|CD14|TLR5|TLR4|TLR13|C1QC
6810	8.1417e-11	5.1406e-09	87	2328	525	28942	transport	ABCD2|STEAP4|SERPINE2|AQP8|LY75|SLA|SNX10|MYL6B|SLC35F1|ATP2A1|CROT|PITPNC1|SLC6A4|AKAP13|DBP|NIPAL1|RASSF4|CREB3L2|CHP2|SLC26A10|CD36|MFSD2A|APOBEC1|VAV3|ABCC4|SLC38A1|KCND1|SLC15A2|FCER1G|DST|SYK|PRKCB|SLC11A1|CYBB|ACSL4|NAV2|VAV1|FCGR1|ARL4C|STX1B|HCK|FCGR3|SLC7A8|RAB36|PPP1R3C|SLC9A9|IRF8|PLIN2|LCP2|RAB39|KCTD12|ABCG3|CLEC4F|ATP6V0D2|SGK2|LY6E|CAMK2B|HCN3|CHRNA2|CHRNA4|PTGER3|WAS|ILDR2|SLC30A…
48523	1.112e-10	6.8618e-09	63	1441	525	28942	negative regulation of cellular process	CDKN1A|SERPINE2|ONECUT1|IFI30|ADRA1A|IKZF4|RGS2|LGALS1|SALL2|BASP1|RGS1|TRIM24|VSIG4|TLE4|FCER1G|CISH|DST|SPINK5|PDE4C|SERPINB9|AVPR1A|SPTB|ADRA2A|GEM|SFRP1|RAP2B|DDIT3|DDIT4|NUPR1|TLR4|SGK2|JDP2|CD44|CD274|INSIG2|RGS16|AIF1|EGFR|PTGS1|SOCS2|CNN2|ZFP57|CUX2|BAG3|INPP5D|HMOX1|HES1|VILL|HSPA5|GADD45A|TMEM132A|EIF2AK3|SYVN1|MAPK15|PER2|PTPRC|PER3|AXL|ID1|SNAI1|BCL2|ID4|HSPA1B
51234	1.2289e-10	7.4146e-09	87	2347	525	28942	establishment of localization	ABCD2|STEAP4|SERPINE2|AQP8|LY75|SLA|SNX10|MYL6B|SLC35F1|ATP2A1|CROT|PITPNC1|SLC6A4|AKAP13|DBP|NIPAL1|RASSF4|CREB3L2|CHP2|SLC26A10|CD36|MFSD2A|APOBEC1|VAV3|ABCC4|SLC38A1|KCND1|SLC15A2|FCER1G|DST|SYK|PRKCB|SLC11A1|CYBB|ACSL4|NAV2|VAV1|FCGR1|ARL4C|STX1B|HCK|FCGR3|SLC7A8|RAB36|PPP1R3C|SLC9A9|IRF8|PLIN2|LCP2|RAB39|KCTD12|ABCG3|CLEC4F|ATP6V0D2|SGK2|LY6E|CAMK2B|HCN3|CHRNA2|CHRNA4|PTGER3|WAS|ILDR2|SLC30A…
2764	1.3805e-10	8.1482e-09	13	65	525	28942	immune response-regulating signaling pathway	FCER1G|SYK|PRKCB|NFAM1|CCK|KLRK1|PTPRC|CLEC7A|C3AR1|TLR7|CD36|TLR5|TLR4
9058	2.4784e-10	1.4317e-08	97	2783	525	28942	biosynthetic process	SPI1|SLA|IKZF4|NSDHL|SALL1|SALL2|CREB3L2|NAMPT|TRIM24|GAMT|TLE4|PRKCB|SLC11A1|DIO1|ARID5B|CYBB|RUNX1|PPP1R3C|DDIT3|RFX4|VOPP1|RPL26|ATP6V0D2|IDI1|INSIG2|FUT11|NPAS2|ACACA|CYB5R3|ZFP57|PPARGC1A|BANP|FDPS|GGT7|PMM1|ATP8B2|GOT1|EIF2AK3|MTHFR|PARP14|POU2F2|ELL3|FASN|MAFF|ID1|SP5|TAF4B|GTF2IRD1|STT3B|NFE2L2|ALAS1|PPP1R10|GBE1|ONECUT1|ATP2A1|BRCA1|DBP|B3GALT1|CD36|SCD1|TEAD1|APOBEC1|SYK|TSC22D1|ELOVL3|…
31323	2.7757e-10	1.57e-08	96	2748	525	28942	regulation of cellular metabolic process	CDKN1A|SPI1|SERPINE2|CERK|ITGB2|ONECUT1|SLA|PCSK9|IKZF4|AKAP13|SALL1|DBP|SALL2|BASP1|CREB3L2|TRIM24|SCD1|TEAD1|TLE4|APOBEC1|VAV3|CISH|SYK|TSC22D1|PRKCB|NFAM1|TNNC1|SLC11A1|SPINK5|ARID5B|ACSL4|ETV1|AVPR1A|VAV1|GEM|RUNX1|TLR1|FCGR3|SFRP1|TOX2|RAP2B|PPP1R3C|DDIT3|RFX4|TFEC|RGN|MCM3|VOPP1|HCLS1|IRF8|TLR4|JDP2|CD44|SMARCD3|INSIG2|ADRB2|HMGCR|AIF1|EGFR|NPAS2|ARNTL|KLRK1|ZFP57|CUX2|INPP5D|HMOX1|HES1|PPA…
6066	2.9029e-10	1.6084e-08	28	372	525	28942	alcohol metabolic process	IDI1|PFKFB3|INSIG2|GBE1|RGS16|ONECUT1|PCSK9|HMGCR|CYP46A1|HK3|NSDHL|CYB5R3|LEPR|CD36|FDPS|PMM1|PKLR|GOT1|CYP39A1|SQLE|GALE|FABP5|SOAT1|PPP1R3C|GLB1|SAA1|SAA2|LY6E
65009	3.7904e-10	2.0582e-08	45	870	525	28942	regulation of molecular function	CDKN1A|SMARCD3|SERPINE2|CERK|PPP1R10|RGS16|ITGB2|PTGER3|PCSK9|ADRB2|HMGCR|ADRA1A|EGFR|HERPUD1|AKAP13|RGS2|RGS1|LEPR|HMOX1|PPARGC1A|VAV3|NQO1|CISH|GADD45B|SYK|HSPA5|GADD45A|NFAM1|TNNC1|SLC11A1|SPINK5|EIF2AK3|SERPINB9|CCK|VAV1|TLR1|ARHGAP10|SFRP1|PTPRC|DDIT3|RGN|BCL2|DOCK2|TLR4|HSPA1B
71216	9.8593e-10	5.2486e-08	11	49	525	28942	cellular response to biotic stimulus	TLR1|HSPA5|DDIT3|EIF2AK3|IRF8|CCK|CD14|CD36|TLR4|NFE2L2|HERPUD1
9893	1.4953e-09	7.8071e-08	45	909	525	28942	positive regulation of metabolic process	SPI1|SMARCD3|ITGB2|ONECUT1|ADRB2|AIF1|NPAS2|SLC6A4|ARNTL|CNN2|KLRK1|CREB3L2|TRIM24|HES1|SCD1|PPARGC1A|TEAD1|WNT2|VAV3|FDPS|SYK|HSPA5|SLC11A1|ETV1|CCK|AVPR1A|POU2F2|MAPK15|TLR1|FCGR3|TOX2|PTPRC|RAP2B|DDIT3|RFX4|CAMK4|BCL2|LCN2|HCLS1|IRF8|LPIN1|TLR4|ALDH1A7|CD44|NFE2L2
10646	1.6974e-09	8.6951e-08	44	880	525	28942	regulation of cell communication	SERPINE2|CHRNA4|RGS16|ONECUT1|IQGAP1|HMGCR|ADRA1A|AACS|EGFR|SOCS2|RGS2|CYTH4|RGS1|INPP5D|LEPR|TRIM24|CD36|RALGDS|VAV3|NTRK2|CISH|SYK|HSPA5|PRKCB|NFAM1|PDE4C|EIF2AK3|CCK|AVPR1A|NPNT|ADRA2A|TLR1|SFRP1|PTPRC|ST5|DDIT4|ID1|RGN|HCLS1|CSPG5|RAPGEF5|DOCK2|TLR4|CD44
1817	2.5035e-09	1.2587e-07	17	151	525	28942	regulation of cytokine production	FCER1G|SYK|SLC11A1|CCK|TLR1|FCGR3|KLRK1|CLEC7A|INPP5D|C3AR1|HMOX1|IRF8|TLR7|VSIG4|CD14|CD36|TLR4
51240	3.2331e-09	1.596e-07	22	262	525	28942	positive regulation of multicellular organismal process	NTRK2|FCER1G|SERPINE2|SLC11A1|PTGER3|CCK|AVPR1A|ADRB2|ADRA1A|AIF1|EGFR|PTGS1|KLRK1|CLEC7A|C3AR1|BCL2|IRF8|TLR7|CD14|CD36|TLR4|WNT2
65008	3.2964e-09	1.5981e-07	56	1314	525	28942	regulation of biological quality	SPI1|SERPINE2|SLA|PCSK9|IFI30|CLDN1|ADRA1A|SLC6A4|HERPUD1|C3AR1|CHP2|TRIM24|CD36|ENTPD1|PRKCB|TNNC1|SLC11A1|DIO1|AVPR1A|SPTB|ADRA2A|DDIT3|CYP21A1|SLC9A9|RGN|HCLS1|TLR7|TLR5|TLR4|ALDH1A7|LY6E|RETSAT|CHRNA4|PTGER3|ILDR2|ADRB2|PIRB|ACACA|PTGS1|HMOX1|VILL|P2RY12|FDPS|KCNJ10|GOT1|EIF2AK3|NEB|MT2|CCK|PTPRC|CCDC88C|ID1|BCL2|HAMP|HSPA1B|HSPA1A
32502	4.2171e-09	2.0087e-07	95	2854	525	28942	developmental process	ACVRL1|SPI1|STEAP4|SERPINE2|ONECUT1|SLA|PCSK9|MYL6B|BRCA1|CLDN1|SERPINA7|ADRA1A|AACS|LGALS3|NSDHL|RGS2|SALL1|LGALS1|CREB3L2|INSC|LEPR|SCD1|TEAD1|DACT1|GAMT|DYNC2H1|VAV3|DST|PEG3|SYK|NFAM1|COBL|ARID5B|ACSL4|ETV1|NPNT|GFRA2|VAV1|GEM|RUNX1|DCSTAMP|SFRP1|RFX4|LY6D|IGHD|HCLS1|IRF8|DOCK2|SGK2|ALDH1A7|CD44|LY6E|HCN3|SMARCD3|INSIG2|ILDR2|ADRB2|HMGCR|PIRB|EGFR|PTGS1|TTN|TYMP|SOCS2|CNN2|ZFP57|INPP5D|HMOX1|…
50790	4.4076e-09	2.0544e-07	39	746	525	28942	regulation of catalytic activity	CDKN1A|SERPINE2|CERK|PPP1R10|RGS16|PTGER3|PCSK9|ADRB2|HMGCR|ADRA1A|EGFR|HERPUD1|AKAP13|RGS2|RGS1|LEPR|VAV3|NQO1|CISH|GADD45B|SYK|HSPA5|GADD45A|TNNC1|SLC11A1|SPINK5|EIF2AK3|SERPINB9|CCK|VAV1|TLR1|ARHGAP10|SFRP1|PTPRC|RGN|BCL2|DOCK2|TLR4|HSPA1B
60255	4.4645e-09	2.0544e-07	87	2526	525	28942	regulation of macromolecule metabolic process	SPI1|SERPINE2|ITGB2|ONECUT1|SLA|PCSK9|BRCA1|IFI30|IKZF4|SLC6A4|SALL1|DBP|SALL2|BASP1|CREB3L2|TRIM24|TEAD1|TLE4|APOBEC1|SYK|TSC22D1|PRKCB|NFAM1|SLC11A1|SPINK5|ARID5B|ETV1|GEM|RUNX1|TLR1|FCGR3|SFRP1|TOX2|RAP2B|PPP1R3C|DDIT3|RFX4|TFEC|MCM3|VOPP1|HCLS1|IRF8|TLR4|ALDH1A7|JDP2|CD44|SMARCD3|ADRB2|AIF1|EGFR|NPAS2|ARNTL|CNN2|ZFP57|CUX2|INPP5D|HMOX1|HES1|PPARGC1A|WNT2|E2F8|BANP|HSPA5|UBE2C|MBD1|EIF2AK3|CCK…
44249	4.6537e-09	2.1058e-07	91	2693	525	28942	cellular biosynthetic process	SPI1|ALAS1|PPP1R10|GBE1|ONECUT1|SLA|ATP2A1|BRCA1|IKZF4|SALL1|DBP|SALL2|CREB3L2|NAMPT|B3GALT1|TRIM24|CD36|SCD1|TEAD1|GAMT|TLE4|APOBEC1|SYK|TSC22D1|PRKCB|ELOVL3|URAD|ARID5B|CYBB|DNTT|ELOVL6|ETV1|CYP4A14|SPTB|ADRA2A|RUNX1|DBF4|PPP1R3C|DDIT3|RFX4|CYP21A1|TFEC|MCM3|VOPP1|IRF8|RPL26|ATP6V0D2|ALDH1A7|JDP2|PRIM2|IDI1|SMARCD3|FUT11|AKR1D1|HMGCR|EGFR|NPAS2|ACACA|PTGS1|ARNTL|ZFP57|CUX2|MTHFD1L|HES1|PPARGC1A…
6986	5.0552e-09	2.2395e-07	10	44	525	28942	response to unfolded protein	HSPA5|DDIT3|CREB3L2|EIF2AK3|SYVN1|CHAC1|HSPA1B|HSPA1A|NFE2L2|HERPUD1
6631	5.1142e-09	2.2395e-07	19	200	525	28942	fatty acid metabolic process	SYK|CYP4A10|ELOVL3|ELOVL6|ACSL4|CYP4A14|BRCA1|CROT|AACS|ACACA|PTGS1|FASN|EHHADH|ACOT2|ACOT1|CD36|SCD1|SLC27A3|LPIN1
2449	7.5468e-09	3.2523e-07	12	73	525	28942	lymphocyte mediated immunity	FCGR1|C1QB|C1QA|FCGR3|FCER1G|SLC11A1|INPP5D|IGHD|SERPINB9|PIRB|POU2F2|C1QC
44255	1.0002e-08	4.1968e-07	30	493	525	28942	cellular lipid metabolic process	IDI1|RETSAT|CERK|INSIG2|PCSK9|BRCA1|CROT|HMGCR|AACS|ACACA|PITPNC1|PTGS1|CD36|SCD1|FDPS|SYK|CYP4A10|ELOVL3|ELOVL6|ACSL4|CYP4A14|FABP5|FASN|EHHADH|ACOT2|ACOT1|SLC27A3|LPIN1|ALDH1A7|DGKH
2274	1.0048e-08	4.1968e-07	10	47	525	28942	myeloid leukocyte activation	TLR1|FCGR3|SPI1|FCER1G|SLC11A1|LCP2|TLR7|PIRB|TLR5|TLR4
9966	1.0901e-08	4.4844e-07	31	524	525	28942	regulation of signal transduction	SERPINE2|RGS16|IQGAP1|HMGCR|ADRA1A|SOCS2|RGS2|CYTH4|RGS1|INPP5D|LEPR|CD36|RALGDS|VAV3|CISH|SYK|PRKCB|EIF2AK3|CCK|TLR1|SFRP1|PTPRC|ST5|DDIT4|ID1|RGN|HCLS1|RAPGEF5|DOCK2|TLR4|CD44
2252	1.1257e-08	4.5615e-07	15	127	525	28942	immune effector process	APOBEC1|C1QB|C1QA|FCER1G|SLC11A1|SERPINB9|CFP|PIRB|POU2F2|FCGR1|FCGR3|PTPRC|INPP5D|IGHD|C1QC
51707	1.2752e-08	5.0913e-07	21	258	525	28942	response to other organism	APOBEC1|FCER1G|PKLR|LYZ2|SLC11A1|SERPINB9|CCK|FCGR1|TLR1|HCK|PTPRC|CLEC7A|LCN2|IRF8|TLR7|CD14|CD36|SCD1|TLR5|HAMP|TLR4
51789	1.3746e-08	5.4087e-07	13	93	525	28942	response to protein stimulus	APCS|HSPA5|EIF2AK3|SYVN1|HERPUD1|DDIT3|CREB3L2|ID1|BCL2|CHAC1|HSPA1B|HSPA1A|NFE2L2
23051	1.4176e-08	5.4983e-07	31	530	525	28942	regulation of signaling process	SERPINE2|RGS16|IQGAP1|HMGCR|ADRA1A|SOCS2|RGS2|CYTH4|RGS1|INPP5D|LEPR|CD36|RALGDS|VAV3|CISH|SYK|PRKCB|EIF2AK3|CCK|TLR1|SFRP1|PTPRC|ST5|DDIT4|ID1|RGN|HCLS1|RAPGEF5|DOCK2|TLR4|CD44
2250	1.9047e-08	7.1825e-07	12	79	525	28942	adaptive immune response	FCGR1|C1QB|C1QA|FCGR3|FCER1G|SLC11A1|INPP5D|IGHD|SERPINB9|PIRB|POU2F2|C1QC
2460	1.9047e-08	7.1825e-07	12	79	525	28942	adaptive immune response based on somatic recombination of immune receptors built from immunoglobulin superfamily domains	FCGR1|C1QB|C1QA|FCGR3|FCER1G|SLC11A1|INPP5D|IGHD|SERPINB9|PIRB|POU2F2|C1QC
46649	2.0298e-08	7.5492e-07	18	195	525	28942	lymphocyte activation	SPI1|SYK|PRKCB|CHRNA4|NFAM1|SLC11A1|ITGB2|ONECUT1|WAS|CCK|POU2F2|VAV1|KLRK1|PTPRC|FCGR4|LY6D|BCL2|DOCK2
7275	2.3174e-08	8.5023e-07	88	2659	525	28942	multicellular organismal development	ACVRL1|SPI1|SERPINE2|ONECUT1|SLA|PCSK9|MYL6B|BRCA1|CLDN1|SERPINA7|ADRA1A|AACS|LGALS3|NSDHL|SALL1|LGALS1|CREB3L2|INSC|LEPR|TEAD1|DACT1|GAMT|DYNC2H1|VAV3|DST|PEG3|SYK|NFAM1|COBL|ARID5B|ACSL4|ETV1|NPNT|GFRA2|VAV1|GEM|RUNX1|DCSTAMP|SFRP1|RFX4|LY6D|IGHD|HCLS1|IRF8|DOCK2|ALDH1A7|CD44|LY6E|HCN3|SMARCD3|INSIG2|ILDR2|ADRB2|HMGCR|PIRB|EGFR|PTGS1|TTN|TYMP|SOCS2|CNN2|ZFP57|INPP5D|HMOX1|HES1|MICALCL|WNT2|BANP…
9605	2.5123e-08	9.0945e-07	24	345	525	28942	response to external stimulus	FCER1G|SERPINE2|ITGB2|FPR1|PCSK9|CXCL1|ETV1|CCK|SERPINA7|AACS|RUNX1|TYMP|TLR1|CNN2|CXCL10|FCGR3|CLEC7A|CCL6|AXL|C3AR1|BCL2|CD36|DOCK2|CCR3
80090	2.606e-08	9.3094e-07	87	2624	525	28942	regulation of primary metabolic process	SPI1|SERPINE2|ITGB2|ONECUT1|SLA|PCSK9|IKZF4|SALL1|DBP|SALL2|BASP1|CREB3L2|TRIM24|SCD1|TEAD1|TLE4|APOBEC1|VAV3|SYK|TSC22D1|PRKCB|NFAM1|TNNC1|SLC11A1|SPINK5|ARID5B|ACSL4|ETV1|AVPR1A|VAV1|GEM|RUNX1|SFRP1|TOX2|RAP2B|PPP1R3C|DDIT3|RFX4|TFEC|RGN|MCM3|VOPP1|HCLS1|IRF8|TLR4|JDP2|CD44|SMARCD3|INSIG2|ADRB2|AIF1|EGFR|NPAS2|ARNTL|ZFP57|CUX2|HMOX1|HES1|PPARGC1A|WNT2|E2F8|BANP|FDPS|HSPA5|UBE2C|MBD1|EIF2AK3|CCK…
51704	3.2959e-08	1.1621e-06	25	377	525	28942	multi-organism process	SERPINE2|LYZ2|CLEC7A|CD14|CD36|SCD1|APOBEC1|FCER1G|VCAM1|PKLR|SLC11A1|SERPINB9|ACSL4|CCK|AVPR1A|FCGR1|TLR1|HCK|PTPRC|LCN2|IRF8|TLR7|TLR5|HAMP|TLR4
2429	5.2014e-08	1.803e-06	9	42	525	28942	immune response-activating cell surface receptor signaling pathway	KLRK1|PTPRC|FCER1G|SYK|PRKCB|CLEC7A|NFAM1|C3AR1|CCK
10604	5.2463e-08	1.803e-06	39	818	525	28942	positive regulation of macromolecule metabolic process	SPI1|SMARCD3|ONECUT1|ADRB2|AIF1|NPAS2|SLC6A4|ARNTL|CNN2|CREB3L2|TRIM24|HES1|PPARGC1A|TEAD1|WNT2|SYK|HSPA5|SLC11A1|ETV1|CCK|POU2F2|MAPK15|TLR1|FCGR3|TOX2|PTPRC|RAP2B|DDIT3|RFX4|CAMK4|BCL2|LCN2|HCLS1|IRF8|LPIN1|TLR4|ALDH1A7|CD44|NFE2L2
23034	6.401e-08	2.1724e-06	41	892	525	28942	intracellular signaling pathway	PTGER3|IQGAP1|BRCA1|ADRB2|RND2|ADRA1A|EGFR|HERPUD1|SOCS2|INPP5D|HMOX1|EPS8L2|RALGDS|P2RY12|VAV3|CISH|GADD45B|SYK|HSPA5|PRKCB|NFAM1|SLC11A1|EIF2AK3|GAB2|AVPR1A|VAV1|GEM|ARL4C|TLR1|PTPRC|RAP2B|DOK3|RAB36|DDIT3|RAB39|NUPR1|RAPGEF5|PLCB2|TLR4|ALDH1A7|NFE2L2
23052	6.5869e-08	2.2078e-06	113	3810	525	28942	signaling	CERK|GPR65|CLDN1|FCNA|NSDHL|RGS2|SALL1|RASSF4|RGS1|C3AR1|LEPR|CMKLR1|IL13RA1|TLE4|ENTPD1|CISH|PRKCB|SLC11A1|ADAM11|ARID5B|ANK2|GEM|FCGR1|STX1B|FCGR3|MTNR1A|SFRP1|DOK3|RAB36|DDIT3|RAB39|NUPR1|CHRNA4|FPR1|ILDR2|IQGAP1|ADRB2|NPAS2|SOCS2|KLRK1|CLEC7A|INPP5D|HMOX1|RALGDS|WNT2|CD163|GADD45B|HSPA5|FZD6|EIF2AK3|MT2|CXCL10|ITGB2L|PTPRC|ARHGAP30|CCDC88C|ID1|NFE2L2|ACVRL1|CNTNAP1|ITGB2|BRCA1|RND2|ADRA1A|WIS…
51716	6.9851e-08	2.3127e-06	35	695	525	28942	cellular response to stimulus	CDKN1A|ITGB2|PCSK9|CXCL1|BRCA1|IFIT1|AACS|HERPUD1|CNN2|CCL6|HMOX1|CD14|CD36|FCER1G|PKLR|SYK|HSPA5|GADD45A|EIF2AK3|CCK|ADRA2A|TLR1|FCGR3|AXL|DDIT3|TFEC|BCL2|LCN2|IRF8|NUPR1|LPIN1|TLR4|HSPA1B|HSPA1A|NFE2L2
32680	7.9726e-08	2.6079e-06	8	32	525	28942	regulation of tumor necrosis factor production	TLR1|FCGR3|FCER1G|CLEC7A|CCK|CD14|CD36|TLR4
1819	9.3998e-08	3.0381e-06	11	74	525	28942	positive regulation of cytokine production	KLRK1|FCER1G|CLEC7A|SLC11A1|C3AR1|IRF8|TLR7|CCK|CD14|CD36|TLR4
2443	9.6372e-08	3.0782e-06	12	91	525	28942	leukocyte mediated immunity	FCGR1|C1QB|C1QA|FCGR3|FCER1G|SLC11A1|INPP5D|IGHD|SERPINB9|PIRB|POU2F2|C1QC
2768	9.8497e-08	3.1095e-06	9	45	525	28942	immune response-regulating cell surface receptor signaling pathway	KLRK1|PTPRC|FCER1G|SYK|PRKCB|CLEC7A|NFAM1|C3AR1|CCK
43436	1.0618e-07	3.2758e-06	29	518	525	28942	oxoacid metabolic process	AKR1D1|BRCA1|CROT|AACS|ACACA|ACMSD|PTGS1|MTHFD1L|CD36|SCD1|GAMT|PKLR|GOT1|SYK|CYP4A10|ELOVL3|MTHFR|ELOVL6|ACSL4|CYP4A14|CYP39A1|P4HA1|FASN|EHHADH|ACOT2|ACOT1|SLC27A3|LPIN1|ALDH1A7
19752	1.0618e-07	3.2758e-06	29	518	525	28942	carboxylic acid metabolic process	AKR1D1|BRCA1|CROT|AACS|ACACA|ACMSD|PTGS1|MTHFD1L|CD36|SCD1|GAMT|PKLR|GOT1|SYK|CYP4A10|ELOVL3|MTHFR|ELOVL6|ACSL4|CYP4A14|CYP39A1|P4HA1|FASN|EHHADH|ACOT2|ACOT1|SLC27A3|LPIN1|ALDH1A7
42325	1.0885e-07	3.3207e-06	24	373	525	28942	regulation of phosphorylation	VAV3|CDKN1A|CISH|CERK|GADD45B|SYK|HSPA5|GADD45A|SLC11A1|CCK|HMGCR|AIF1|MAPK15|EGFR|TLR1|AKAP13|SFRP1|PTPRC|RAP2B|CCDC88C|BCL2|HCLS1|TLR4|CD44
6082	1.1059e-07	3.3361e-06	29	519	525	28942	organic acid metabolic process	AKR1D1|BRCA1|CROT|AACS|ACACA|ACMSD|PTGS1|MTHFD1L|CD36|SCD1|GAMT|PKLR|GOT1|SYK|CYP4A10|ELOVL3|MTHFR|ELOVL6|ACSL4|CYP4A14|CYP39A1|P4HA1|FASN|EHHADH|ACOT2|ACOT1|SLC27A3|LPIN1|ALDH1A7
31325	1.1473e-07	3.4094e-06	39	843	525	28942	positive regulation of cellular metabolic process	SPI1|SMARCD3|ITGB2|ONECUT1|ADRB2|AIF1|NPAS2|ARNTL|KLRK1|CREB3L2|TRIM24|HES1|SCD1|PPARGC1A|TEAD1|WNT2|SYK|HSPA5|SLC11A1|ETV1|CCK|AVPR1A|POU2F2|MAPK15|TLR1|FCGR3|TOX2|PTPRC|RAP2B|DDIT3|RFX4|CAMK4|BCL2|HCLS1|IRF8|LPIN1|TLR4|CD44|NFE2L2
44092	1.1553e-07	3.4094e-06	17	195	525	28942	negative regulation of molecular function	NQO1|CDKN1A|SERPINE2|GADD45B|GADD45A|SPINK5|PCSK9|SERPINB9|ADRB2|HMGCR|HERPUD1|SFRP1|PTPRC|DDIT3|LEPR|HMOX1|HSPA1B
8610	1.2753e-07	3.7231e-06	21	295	525	28942	lipid biosynthetic process	IDI1|FDPS|HSD3B7|SYK|INSIG2|ELOVL3|AKR1D1|ELOVL6|CYP4A14|BRCA1|HMGCR|ACACA|PTGS1|NSDHL|CYB5R3|FABP5|FASN|CYP21A1|CD36|SCD1|ALDH1A7
42742	1.3156e-07	3.7999e-06	13	112	525	28942	defense response to bacterium	FCER1G|LYZ2|SLC11A1|SERPINB9|CCK|FCGR1|HCK|IRF8|CD36|SCD1|TLR5|HAMP|TLR4
2699	1.3941e-07	3.9426e-06	10	61	525	28942	positive regulation of immune effector process	FCGR1|FCGR3|KLRK1|PTPRC|FCER1G|SYK|CD36|TLR4|HSPA1B|IL13RA1
19724	1.3941e-07	3.9426e-06	10	61	525	28942	B cell mediated immunity	FCGR1|C1QB|C1QA|FCGR3|FCER1G|INPP5D|IGHD|PIRB|POU2F2|C1QC
2758	1.6449e-07	4.604e-06	7	24	525	28942	innate immune response-activating signal transduction	KLRK1|CLEC7A|TLR7|CCK|CD36|TLR5|TLR4
48731	1.6956e-07	4.6976e-06	73	2151	525	28942	system development	ACVRL1|SPI1|SERPINE2|ONECUT1|SLA|PCSK9|MYL6B|CLDN1|ADRA1A|AACS|LGALS3|NSDHL|LGALS1|CREB3L2|INSC|LEPR|TEAD1|GAMT|DYNC2H1|VAV3|DST|PEG3|SYK|NFAM1|COBL|ARID5B|ACSL4|ETV1|NPNT|GFRA2|VAV1|GEM|RUNX1|DCSTAMP|SFRP1|RFX4|LY6D|IGHD|HCLS1|IRF8|DOCK2|ALDH1A7|CD44|LY6E|SMARCD3|INSIG2|ILDR2|PIRB|EGFR|PTGS1|TTN|TYMP|SOCS2|CNN2|ZFP57|HMOX1|HES1|WNT2|NTRK2|VCAM1|HSPA5|FZD6|EIF2AK3|CCK|POU2F2|PTPRC|MAB21L2|ID1|SNA…
42180	1.8583e-07	5.0964e-06	29	532	525	28942	cellular ketone metabolic process	AKR1D1|BRCA1|CROT|AACS|ACACA|ACMSD|PTGS1|MTHFD1L|CD36|SCD1|GAMT|PKLR|GOT1|SYK|CYP4A10|ELOVL3|MTHFR|ELOVL6|ACSL4|CYP4A14|CYP39A1|P4HA1|FASN|EHHADH|ACOT2|ACOT1|SLC27A3|LPIN1|ALDH1A7
48513	2.0981e-07	5.6963e-06	61	1680	525	28942	organ development	ACVRL1|SPI1|SERPINE2|ONECUT1|SLA|PCSK9|MYL6B|ADRA1A|AACS|NSDHL|CREB3L2|LEPR|TEAD1|GAMT|DYNC2H1|VAV3|PEG3|SYK|NFAM1|COBL|ARID5B|ETV1|NPNT|VAV1|GEM|RUNX1|DCSTAMP|SFRP1|RFX4|LY6D|HCLS1|IRF8|DOCK2|ALDH1A7|CD44|LY6E|SMARCD3|INSIG2|ILDR2|PIRB|EGFR|PTGS1|TTN|TYMP|SOCS2|CNN2|HMOX1|HES1|WNT2|NTRK2|VCAM1|HSPA5|FZD6|EIF2AK3|POU2F2|PTPRC|MAB21L2|ID1|SNAI1|BCL2|ID4
6909	2.1411e-07	5.7556e-06	9	49	525	28942	phagocytosis	FCGR1|HCK|FCGR3|FCER1G|CLEC7A|SLC11A1|IRF8|CD36|VAV1
51174	2.2468e-07	5.8151e-06	24	388	525	28942	regulation of phosphorus metabolic process	VAV3|CDKN1A|CISH|CERK|GADD45B|SYK|HSPA5|GADD45A|SLC11A1|CCK|HMGCR|AIF1|MAPK15|EGFR|TLR1|AKAP13|SFRP1|PTPRC|RAP2B|CCDC88C|BCL2|HCLS1|TLR4|CD44
19220	2.2468e-07	5.8151e-06	24	388	525	28942	regulation of phosphate metabolic process	VAV3|CDKN1A|CISH|CERK|GADD45B|SYK|HSPA5|GADD45A|SLC11A1|CCK|HMGCR|AIF1|MAPK15|EGFR|TLR1|AKAP13|SFRP1|PTPRC|RAP2B|CCDC88C|BCL2|HCLS1|TLR4|CD44
42127	2.2482e-07	5.8151e-06	33	664	525	28942	regulation of cell proliferation	CD274|CDKN1A|SERPINE2|ADRB2|IFI30|AIF1|EGFR|PTGS1|CNN2|INPP5D|NAMPT|TRIM24|HMOX1|HES1|VSIG4|WNT2|CCR3|IL13RA1|APOBEC1|ABCC4|SYK|CCK|AVPR1A|CXCL10|PTPRC|MAB21L2|BCL2|ID4|IGHD|HCLS1|NUPR1|TLR4|ALDH1A7
2218	2.2489e-07	5.8151e-06	7	25	525	28942	activation of innate immune response	KLRK1|CLEC7A|TLR7|CCK|CD36|TLR5|TLR4
70887	3.0044e-07	7.6952e-06	19	258	525	28942	cellular response to chemical stimulus	FCER1G|PKLR|HSPA5|ITGB2|EIF2AK3|PCSK9|CXCL1|IFIT1|AACS|ADRA2A|HERPUD1|FCGR3|CCL6|AXL|DDIT3|LCN2|HMOX1|LPIN1|NFE2L2
10468	3.2356e-07	8.2098e-06	74	2229	525	28942	regulation of gene expression	SPI1|SERPINE2|ITGB2|ONECUT1|SLA|BRCA1|IFI30|IKZF4|SLC6A4|SALL1|DBP|SALL2|BASP1|CREB3L2|TRIM24|TEAD1|TLE4|APOBEC1|TSC22D1|PRKCB|NFAM1|SLC11A1|ARID5B|ETV1|GEM|RUNX1|SFRP1|TOX2|DDIT3|RFX4|TFEC|MCM3|VOPP1|IRF8|TLR4|ALDH1A7|JDP2|CD44|SMARCD3|ADRB2|AIF1|NPAS2|ARNTL|CNN2|ZFP57|CUX2|HMOX1|HES1|PPARGC1A|WNT2|E2F8|BANP|MBD1|EIF2AK3|CCK|PARP14|POU2F2|MAPK15|ELL3|PER2|PER3|CAMK4|MAFF|CCDC88C|ID1|SNAI1|BCL2|L…
31349	3.5482e-07	8.9198e-06	11	84	525	28942	positive regulation of defense response	FCGR1|FCGR3|KLRK1|FCER1G|CLEC7A|PTGER3|TLR7|CCK|CD36|TLR5|TLR4
43067	3.9532e-07	9.8467e-06	32	648	525	28942	regulation of programmed cell death	CDKN1A|SPI1|PCSK9|BRCA1|ADRB2|AIF1|EGFR|HERPUD1|BAG3|INPP5D|HMOX1|BMF|NQO1|FCER1G|TMEM132A|EIF2AK3|SYVN1|SERPINB9|ANK2|CCK|FCGR1|FCGR3|SFRP1|PTPRC|AXL|DDIT3|BCL2|NUPR1|TLR4|ALDH1A7|HSPA1B|CD44
42592	4.8315e-07	1.1925e-05	33	687	525	28942	homeostatic process	SPI1|CHRNA4|PTGER3|SLA|ILDR2|PCSK9|ADRB2|PIRB|CLDN1|ADRA1A|ACACA|HERPUD1|C3AR1|CHP2|TRIM24|CD36|KCNJ10|GOT1|PRKCB|SLC11A1|MT2|AVPR1A|ADRA2A|PTPRC|DDIT3|SLC9A9|RGN|BCL2|HCLS1|HAMP|TLR4|HSPA1B|HSPA1A
50764	5.2843e-07	1.2925e-05	7	28	525	28942	regulation of phagocytosis	FCGR1|CNN2|FCGR3|FCER1G|CLEC7A|SLC11A1|CD36
32760	5.341e-07	1.2947e-05	6	18	525	28942	positive regulation of tumor necrosis factor production	FCER1G|CLEC7A|CCK|CD14|CD36|TLR4
10941	6.0946e-07	1.4643e-05	32	661	525	28942	regulation of cell death	CDKN1A|SPI1|PCSK9|BRCA1|ADRB2|AIF1|EGFR|HERPUD1|BAG3|INPP5D|HMOX1|BMF|NQO1|FCER1G|TMEM132A|EIF2AK3|SYVN1|SERPINB9|ANK2|CCK|FCGR1|FCGR3|SFRP1|PTPRC|AXL|DDIT3|BCL2|NUPR1|TLR4|ALDH1A7|HSPA1B|CD44
48856	7.3559e-07	1.7519e-05	76	2362	525	28942	anatomical structure development	ACVRL1|SPI1|SERPINE2|ONECUT1|SLA|PCSK9|MYL6B|CLDN1|ADRA1A|AACS|LGALS3|NSDHL|SALL1|LGALS1|CREB3L2|INSC|LEPR|TEAD1|GAMT|DYNC2H1|VAV3|DST|PEG3|SYK|NFAM1|COBL|ARID5B|ACSL4|ETV1|NPNT|GFRA2|VAV1|GEM|RUNX1|DCSTAMP|SFRP1|RFX4|LY6D|IGHD|HCLS1|IRF8|DOCK2|ALDH1A7|CD44|LY6E|SMARCD3|INSIG2|ILDR2|ADRB2|PIRB|EGFR|PTGS1|TTN|TYMP|SOCS2|CNN2|ZFP57|HMOX1|HES1|WNT2|NTRK2|VCAM1|HSPA5|FZD6|EIF2AK3|NEB|CCK|POU2F2|PTPRC…
6694	7.9076e-07	1.8669e-05	10	73	525	28942	steroid biosynthetic process	IDI1|FDPS|HSD3B7|NSDHL|CYB5R3|INSIG2|CYP21A1|AKR1D1|CD36|HMGCR
42981	8.752e-07	2.0264e-05	31	639	525	28942	regulation of apoptosis	CDKN1A|SPI1|PCSK9|BRCA1|ADRB2|AIF1|EGFR|HERPUD1|BAG3|INPP5D|HMOX1|BMF|NQO1|FCER1G|EIF2AK3|SYVN1|SERPINB9|ANK2|CCK|FCGR1|FCGR3|SFRP1|PTPRC|AXL|DDIT3|BCL2|NUPR1|TLR4|ALDH1A7|HSPA1B|CD44
22610	8.8073e-07	2.0264e-05	28	542	525	28942	biological adhesion	CYFIP2|SPON2|CNTNAP1|SELPLG|CLSTN3|ITGB2|SDC3|CLDN1|WISP1|SIGLECE|LGALS1|CLEC7A|EMILIN2|HES1|CD36|CD34|CD33|VCAM1|DST|PARVB|NPNT|DSG1C|LRFN3|ITGB2L|PTPRC|BCL2|SIGLEC1|CD44
7155	8.8073e-07	2.0264e-05	28	542	525	28942	cell adhesion	CYFIP2|SPON2|CNTNAP1|SELPLG|CLSTN3|ITGB2|SDC3|CLDN1|WISP1|SIGLECE|LGALS1|CLEC7A|EMILIN2|HES1|CD36|CD34|CD33|VCAM1|DST|PARVB|NPNT|DSG1C|LRFN3|ITGB2L|PTPRC|BCL2|SIGLEC1|CD44
43549	9.9661e-07	2.2738e-05	17	227	525	28942	regulation of kinase activity	VAV3|CDKN1A|CISH|CERK|GADD45B|SYK|HSPA5|GADD45A|SLC11A1|CCK|HMGCR|EGFR|TLR1|AKAP13|SFRP1|PTPRC|TLR4
16064	1.1151e-06	2.5229e-05	9	59	525	28942	immunoglobulin mediated immune response	FCGR1|C1QB|C1QA|FCGR3|FCER1G|INPP5D|IGHD|POU2F2|C1QC
9617	1.218e-06	2.7329e-05	15	181	525	28942	response to bacterium	FCER1G|LYZ2|SLC11A1|SERPINB9|CCK|FCGR1|TLR1|HCK|IRF8|CD14|CD36|SCD1|TLR5|HAMP|TLR4
43086	1.338e-06	2.9775e-05	14	159	525	28942	negative regulation of catalytic activity	NQO1|CDKN1A|SERPINE2|GADD45B|GADD45A|SPINK5|PCSK9|SERPINB9|HMGCR|HERPUD1|SFRP1|PTPRC|LEPR|HSPA1B
42493	1.3948e-06	3.0787e-05	12	116	525	28942	response to drug	APOBEC1|ABCC4|SLC15A2|PRKCB|BCL2|LCN2|CYBB|CROT|ABCB1A|SERPINA7|ADRA1A|AACS
10647	1.4995e-06	3.2831e-05	18	260	525	28942	positive regulation of cell communication	NTRK2|SERPINE2|SYK|PRKCB|NFAM1|EIF2AK3|CCK|NPNT|ADRA1A|EGFR|PTPRC|ST5|LEPR|HCLS1|CD36|DOCK2|TLR4|CD44
51338	1.6063e-06	3.4888e-05	17	235	525	28942	regulation of transferase activity	VAV3|CDKN1A|CISH|CERK|GADD45B|SYK|HSPA5|GADD45A|SLC11A1|CCK|HMGCR|EGFR|TLR1|AKAP13|SFRP1|PTPRC|TLR4
2221	2.0182e-06	4.3487e-05	6	22	525	28942	pattern recognition receptor signaling pathway	CLEC7A|TLR7|CCK|CD36|TLR5|TLR4
45859	2.5318e-06	5.4125e-05	16	217	525	28942	regulation of protein kinase activity	CDKN1A|CISH|CERK|GADD45B|SYK|HSPA5|GADD45A|SLC11A1|CCK|HMGCR|EGFR|TLR1|AKAP13|SFRP1|PTPRC|TLR4
8284	2.6379e-06	5.5953e-05	22	385	525	28942	positive regulation of cell proliferation	ABCC4|CDKN1A|SYK|CCK|AVPR1A|ADRB2|AIF1|EGFR|CXCL10|PTPRC|NAMPT|MAB21L2|BCL2|ID4|IGHD|HCLS1|HES1|TLR4|WNT2|ALDH1A7|CCR3|IL13RA1
48869	3.0149e-06	6.3452e-05	59	1740	525	28942	cellular developmental process	SPI1|STEAP4|SERPINE2|ONECUT1|SLA|PCSK9|LGALS3|RGS2|SALL1|LGALS1|CREB3L2|INSC|SCD1|DYNC2H1|DST|PEG3|SYK|NFAM1|ACSL4|ETV1|NPNT|VAV1|RUNX1|DCSTAMP|SFRP1|LY6D|HCLS1|IRF8|DOCK2|SGK2|ALDH1A7|CD44|SMARCD3|ILDR2|ADRB2|PIRB|EGFR|PTGS1|TTN|SOCS2|HES1|MICALCL|WNT2|NTRK2|GADD45B|EIF2AK3|NEB|CCK|POU2F2|PTPRC|MTL5|AXL|ID1|SNAI1|BCL2|ID4|CSPG5|LPIN1|NES
32675	3.2858e-06	6.8623e-05	7	36	525	28942	regulation of interleukin-6 production	TLR1|FCER1G|INPP5D|TLR7|CCK|CD36|TLR4
6695	3.5301e-06	7.3162e-05	6	24	525	28942	cholesterol biosynthetic process	IDI1|FDPS|NSDHL|CYB5R3|INSIG2|HMGCR
70391	3.5877e-06	7.3238e-05	4	7	525	28942	response to lipoteichoic acid	CCK|CD14|CD36|TLR4
71223	3.5877e-06	7.3238e-05	4	7	525	28942	cellular response to lipoteichoic acid	CCK|CD14|CD36|TLR4
9968	3.6516e-06	7.3986e-05	10	86	525	28942	negative regulation of signal transduction	SOCS2|RGS2|SERPINE2|CISH|RGS1|INPP5D|RGS16|DDIT4|ADRA1A|TLR4
46394	3.7942e-06	7.5745e-05	13	150	525	28942	carboxylic acid biosynthetic process	PKLR|GOT1|SYK|ELOVL3|AKR1D1|MTHFR|ELOVL6|CYP4A14|BRCA1|ACACA|PTGS1|FASN|SCD1
16053	3.7942e-06	7.5745e-05	13	150	525	28942	organic acid biosynthetic process	PKLR|GOT1|SYK|ELOVL3|AKR1D1|MTHFR|ELOVL6|CYP4A14|BRCA1|ACACA|PTGS1|FASN|SCD1
9889	3.9737e-06	7.8749e-05	72	2300	525	28942	regulation of biosynthetic process	SPI1|ITGB2|ONECUT1|SLA|IKZF4|SALL1|DBP|SALL2|BASP1|CREB3L2|TRIM24|TEAD1|TLE4|SYK|TSC22D1|PRKCB|NFAM1|SLC11A1|ARID5B|ETV1|AVPR1A|GEM|RUNX1|TLR1|FCGR3|TOX2|PPP1R3C|DDIT3|RFX4|TFEC|MCM3|VOPP1|IRF8|TLR4|JDP2|SMARCD3|INSIG2|ADRB2|AIF1|NPAS2|ARNTL|KLRK1|ZFP57|CUX2|INPP5D|HMOX1|HES1|PPARGC1A|WNT2|E2F8|BANP|FDPS|MBD1|EIF2AK3|CCK|PARP14|POU2F2|MAPK15|ELL3|PER2|PER3|CAMK4|MAFF|ID1|SNAI1|BCL2|ID4|SP5|TAF4B|…
23057	4.0597e-06	7.987e-05	10	87	525	28942	negative regulation of signaling process	SOCS2|RGS2|SERPINE2|CISH|RGS1|INPP5D|RGS16|DDIT4|ADRA1A|TLR4
30097	4.3615e-06	8.5191e-05	17	253	525	28942	hemopoiesis	SPI1|SYK|NFAM1|ONECUT1|SLA|PIRB|POU2F2|VAV1|RUNX1|CNN2|DCSTAMP|PTPRC|LY6D|BCL2|HCLS1|IRF8|DOCK2
50766	4.5738e-06	8.87e-05	6	25	525	28942	positive regulation of phagocytosis	FCGR1|FCGR3|FCER1G|CLEC7A|SLC11A1|CD36
10628	4.8376e-06	9.315e-05	29	626	525	28942	positive regulation of gene expression	SPI1|SMARCD3|ONECUT1|ADRB2|NPAS2|SLC6A4|ARNTL|CNN2|CREB3L2|TRIM24|HES1|PPARGC1A|TEAD1|WNT2|SLC11A1|ETV1|POU2F2|TOX2|DDIT3|RFX4|CAMK4|BCL2|LCN2|IRF8|LPIN1|TLR4|ALDH1A7|CD44|NFE2L2
50865	5.0678e-06	9.6192e-05	14	178	525	28942	regulation of cell activation	CD274|CDKN1A|FCER1G|SERPINE2|SYK|NFAM1|CCK|PTPRC|INPP5D|IGHD|HMOX1|VSIG4|TLR4|IL13RA1
9967	5.0746e-06	9.6192e-05	13	154	525	28942	positive regulation of signal transduction	SYK|PRKCB|EIF2AK3|CCK|ADRA1A|PTPRC|ST5|LEPR|HCLS1|CD36|DOCK2|TLR4|CD44
16043	5.1363e-06	9.6192e-05	64	1978	525	28942	cellular component organization	ACVRL1|SERPINE2|ONECUT1|LY75|BRCA1|KIF11|LGALS3|RASSF4|TRIM24|CD36|HMGN3|DYNC2H1|VAV3|FCER1G|DST|PRKCB|SLC11A1|ACSL4|ETV1|NPNT|TUBA4A|VAV1|GEM|FCGR1|HCK|ARHGAP10|FCGR3|SFRP1|IRF8|DOCK2|CLEC4F|ALDH1A7|CD44|TSPYL5|APCS|SMARCD3|WAS|AK7|AIF1|EGFR|TTN|CNN2|CLEC7A|HES1|VILL|PPARGC1A|WNT2|BANP|KCNJ10|GADD45A|UBE2C|EIF2AK3|NEB|CCK|WEE1|P4HA1|CCDC88C|ID1|BCL2|LCN2|LPIN1|NES|HSPA1B|HSPA1A
40011	5.1373e-06	9.6192e-05	21	371	525	28942	locomotion	VAV3|FCER1G|SELPLG|ITGB2|FPR1|ARID5B|CXCL1|CCK|GAB2|EGFR|TTN|TYMP|CXCL10|FCGR3|CCL6|C3AR1|CD36|DOCK2|CD34|CCR3|CD44
42330	5.3332e-06	9.8501e-05	11	110	525	28942	taxis	CXCL10|FCGR3|FCER1G|CCL6|ITGB2|C3AR1|FPR1|CXCL1|DOCK2|CCR3|TYMP
6935	5.3332e-06	9.8501e-05	11	110	525	28942	chemotaxis	CXCL10|FCGR3|FCER1G|CCL6|ITGB2|C3AR1|FPR1|CXCL1|DOCK2|CCR3|TYMP
31326	5.4347e-06	9.932e-05	71	2278	525	28942	regulation of cellular biosynthetic process	SPI1|ITGB2|ONECUT1|SLA|IKZF4|SALL1|DBP|SALL2|BASP1|CREB3L2|TRIM24|TEAD1|TLE4|SYK|TSC22D1|PRKCB|NFAM1|SLC11A1|ARID5B|ETV1|AVPR1A|GEM|RUNX1|TLR1|FCGR3|TOX2|PPP1R3C|DDIT3|RFX4|TFEC|MCM3|VOPP1|IRF8|TLR4|JDP2|SMARCD3|INSIG2|ADRB2|AIF1|NPAS2|ARNTL|KLRK1|ZFP57|CUX2|INPP5D|HMOX1|HES1|PPARGC1A|WNT2|E2F8|BANP|MBD1|EIF2AK3|CCK|PARP14|POU2F2|MAPK15|ELL3|PER2|PER3|CAMK4|MAFF|ID1|SNAI1|BCL2|ID4|SP5|TAF4B|GTF2I…
43068	5.4507e-06	9.932e-05	18	285	525	28942	positive regulation of programmed cell death	NQO1|CDKN1A|SPI1|PCSK9|SERPINB9|CCK|BRCA1|ADRB2|FCGR1|FCGR3|PTPRC|DDIT3|INPP5D|HMOX1|NUPR1|TLR4|ALDH1A7|CD44
2697	5.8244e-06	0.00010429	11	111	525	28942	regulation of immune effector process	FCGR1|FCGR3|KLRK1|PTPRC|FCER1G|SYK|HMOX1|CD36|TLR4|HSPA1B|IL13RA1
23056	5.8476e-06	0.00010429	13	156	525	28942	positive regulation of signaling process	SYK|PRKCB|EIF2AK3|CCK|ADRA1A|PTPRC|ST5|LEPR|HCLS1|CD36|DOCK2|TLR4|CD44
71219	5.8551e-06	0.00010429	6	26	525	28942	cellular response to molecule of bacterial origin	TLR1|IRF8|CCK|CD14|CD36|TLR4
1803	5.9354e-06	0.00010429	3	3	525	28942	regulation of type III hypersensitivity	FCGR1|FCGR3|FCER1G
1805	5.9354e-06	0.00010429	3	3	525	28942	positive regulation of type III hypersensitivity	FCGR1|FCGR3|FCER1G
30154	5.9542e-06	0.00010429	57	1697	525	28942	cell differentiation	SPI1|STEAP4|SERPINE2|ONECUT1|SLA|PCSK9|LGALS3|RGS2|SALL1|LGALS1|CREB3L2|INSC|SCD1|DST|PEG3|SYK|NFAM1|ACSL4|ETV1|NPNT|VAV1|RUNX1|DCSTAMP|SFRP1|LY6D|HCLS1|IRF8|DOCK2|SGK2|ALDH1A7|CD44|SMARCD3|ILDR2|ADRB2|PIRB|EGFR|PTGS1|TTN|SOCS2|HES1|MICALCL|WNT2|NTRK2|GADD45B|EIF2AK3|NEB|CCK|POU2F2|PTPRC|MTL5|AXL|ID1|SNAI1|BCL2|ID4|CSPG5|LPIN1
31328	6.5271e-06	0.0001136	31	705	525	28942	positive regulation of cellular biosynthetic process	SPI1|SMARCD3|ITGB2|ONECUT1|ADRB2|AIF1|NPAS2|ARNTL|KLRK1|CREB3L2|TRIM24|HES1|PPARGC1A|TEAD1|WNT2|SYK|SLC11A1|ETV1|AVPR1A|POU2F2|TLR1|FCGR3|TOX2|DDIT3|RFX4|CAMK4|BCL2|IRF8|LPIN1|TLR4|NFE2L2
32944	6.749e-06	0.00011597	10	92	525	28942	regulation of mononuclear cell proliferation	CD274|CDKN1A|PTPRC|SYK|INPP5D|IGHD|CCK|VSIG4|TLR4|IL13RA1
50670	6.749e-06	0.00011597	10	92	525	28942	regulation of lymphocyte proliferation	CD274|CDKN1A|PTPRC|SYK|INPP5D|IGHD|CCK|VSIG4|TLR4|IL13RA1
2821	6.8925e-06	0.00011696	7	40	525	28942	positive regulation of adaptive immune response	FCGR1|FCGR3|PTPRC|FCER1G|SLC11A1|CCK|HSPA1B
2824	6.8925e-06	0.00011696	7	40	525	28942	positive regulation of adaptive immune response based on somatic recombination of immune receptors built from immunoglobulin superfamily domains	FCGR1|FCGR3|PTPRC|FCER1G|SLC11A1|CCK|HSPA1B
10942	7.2613e-06	0.00012245	18	291	525	28942	positive regulation of cell death	NQO1|CDKN1A|SPI1|PCSK9|SERPINB9|CCK|BRCA1|ADRB2|FCGR1|FCGR3|PTPRC|DDIT3|INPP5D|HMOX1|NUPR1|TLR4|ALDH1A7|CD44
44093	7.4155e-06	0.00012428	21	380	525	28942	positive regulation of molecular function	VAV3|CISH|CERK|GADD45B|SYK|HSPA5|NFAM1|SLC11A1|ITGB2|PTGER3|EIF2AK3|CCK|ADRB2|ADRA1A|EGFR|TLR1|PTPRC|RGN|BCL2|PPARGC1A|TLR4
32879	7.6976e-06	0.00012821	30	676	525	28942	regulation of localization	SERPINE2|CHRNA4|ONECUT1|ADRB2|AIF1|AACS|PTGS1|CNN2|CLEC7A|C3AR1|HMOX1|CD36|P2RY12|NTRK2|FCER1G|SYK|PRKCB|TNNC1|SLC11A1|PDE4C|AVPR1A|ADRA2A|FCGR1|CXCL10|STX1B|FCGR3|PTPRC|RAP2B|ABI3|BCL2
45089	8.1824e-06	0.00013341	7	41	525	28942	positive regulation of innate immune response	KLRK1|CLEC7A|TLR7|CCK|CD36|TLR5|TLR4
50871	8.1824e-06	0.00013341	7	41	525	28942	positive regulation of B cell activation	CDKN1A|PTPRC|SYK|INPP5D|IGHD|TLR4|IL13RA1
70663	8.1933e-06	0.00013341	10	94	525	28942	regulation of leukocyte proliferation	CD274|CDKN1A|PTPRC|SYK|INPP5D|IGHD|CCK|VSIG4|TLR4|IL13RA1
60627	8.2058e-06	0.00013341	11	115	525	28942	regulation of vesicle-mediated transport	FCGR1|CNN2|STX1B|FCGR3|FCER1G|SYK|CLEC7A|SLC11A1|HMOX1|CD36|ADRA2A
44283	8.7094e-06	0.00014075	22	415	525	28942	small molecule biosynthetic process	GAMT|FDPS|GGT7|PMM1|PKLR|ATP8B2|GOT1|SYK|ELOVL3|AKR1D1|MTHFR|ELOVL6|ATP2A1|CYP4A14|BRCA1|ACACA|PTGS1|FASN|NAMPT|SCD1|ATP6V0D2|ALDH1A7
9891	8.8613e-06	0.00014236	31	716	525	28942	positive regulation of biosynthetic process	SPI1|SMARCD3|ITGB2|ONECUT1|ADRB2|AIF1|NPAS2|ARNTL|KLRK1|CREB3L2|TRIM24|HES1|PPARGC1A|TEAD1|WNT2|SYK|SLC11A1|ETV1|AVPR1A|POU2F2|TLR1|FCGR3|TOX2|DDIT3|RFX4|CAMK4|BCL2|IRF8|LPIN1|TLR4|NFE2L2
50864	9.6084e-06	0.00015345	8	58	525	28942	regulation of B cell activation	CDKN1A|PTPRC|SYK|NFAM1|INPP5D|IGHD|TLR4|IL13RA1
34620	9.9564e-06	0.00015716	5	17	525	28942	cellular response to unfolded protein	HSPA5|DDIT3|EIF2AK3|NFE2L2|HERPUD1
30968	9.9564e-06	0.00015716	5	17	525	28942	endoplasmic reticulum unfolded protein response	HSPA5|DDIT3|EIF2AK3|NFE2L2|HERPUD1
10648	1.017e-05	0.0001596	16	242	525	28942	negative regulation of cell communication	SERPINE2|CISH|HSPA5|RGS16|ONECUT1|AVPR1A|ADRA1A|SOCS2|SFRP1|RGS2|PTPRC|RGS1|INPP5D|DDIT4|TLR4|CD44
80134	1.1271e-05	0.00017587	16	244	525	28942	regulation of response to stress	FCER1G|SERPINE2|SYK|PTGER3|CCK|ADRB2|FCGR1|FCGR3|SFRP1|KLRK1|CLEC7A|TLR7|CD36|TLR5|TLR4|CD44
46651	1.1366e-05	0.00017634	7	43	525	28942	lymphocyte proliferation	PTPRC|FCGR4|SLC11A1|ITGB2|BCL2|CCK|DOCK2
2520	1.1505e-05	0.00017694	18	301	525	28942	immune system development	SPI1|SYK|NFAM1|ONECUT1|SLA|PIRB|POU2F2|VAV1|RUNX1|CNN2|DCSTAMP|PTPRC|LY6D|BCL2|IGHD|HCLS1|IRF8|DOCK2
6953	1.1535e-05	0.00017694	6	29	525	28942	acute-phase response	CD163|ORM1|SAA3|PTGER3|ORM3|ORM2
10627	1.2081e-05	0.00018426	14	192	525	28942	regulation of intracellular protein kinase cascade	SYK|PRKCB|CCK|ADRA1A|SOCS2|SFRP1|PTPRC|ST5|ID1|LEPR|HCLS1|CD36|TLR4|CD44
10556	1.3137e-05	0.00019925	67	2166	525	28942	regulation of macromolecule biosynthetic process	SPI1|ITGB2|ONECUT1|SLA|IKZF4|SALL1|DBP|SALL2|BASP1|CREB3L2|TRIM24|TEAD1|TLE4|SYK|TSC22D1|PRKCB|NFAM1|SLC11A1|ARID5B|ETV1|GEM|RUNX1|TLR1|FCGR3|TOX2|PPP1R3C|DDIT3|RFX4|TFEC|MCM3|VOPP1|IRF8|TLR4|JDP2|SMARCD3|ADRB2|NPAS2|ARNTL|ZFP57|CUX2|INPP5D|HMOX1|HES1|PPARGC1A|WNT2|E2F8|BANP|MBD1|EIF2AK3|CCK|PARP14|POU2F2|MAPK15|ELL3|PER2|PER3|CAMK4|MAFF|ID1|SNAI1|BCL2|ID4|SP5|TAF4B|GTF2IRD1|LPIN1|NFE2L2
2521	1.3296e-05	0.0001996	12	144	525	28942	leukocyte differentiation	DCSTAMP|SPI1|PTPRC|SYK|NFAM1|ONECUT1|LY6D|BCL2|PIRB|POU2F2|DOCK2|VAV1
32943	1.3307e-05	0.0001996	7	44	525	28942	mononuclear cell proliferation	PTPRC|FCGR4|SLC11A1|ITGB2|BCL2|CCK|DOCK2
42098	1.4199e-05	0.00021066	6	30	525	28942	T cell proliferation	PTPRC|FCGR4|SLC11A1|ITGB2|CCK|DOCK2
16126	1.4199e-05	0.00021066	6	30	525	28942	sterol biosynthetic process	IDI1|FDPS|NSDHL|CYB5R3|INSIG2|HMGCR
70661	1.5514e-05	0.00022891	7	45	525	28942	leukocyte proliferation	PTPRC|FCGR4|SLC11A1|ITGB2|BCL2|CCK|DOCK2
51241	1.6376e-05	0.00024032	12	147	525	28942	negative regulation of multicellular organismal process	SOCS2|SERPINE2|SLC11A1|INPP5D|EIF2AK3|HMOX1|VSIG4|AVPR1A|ADRB2|ADRA1A|TLR4|HSPA1B
2694	1.681e-05	0.00024537	13	172	525	28942	regulation of leukocyte activation	CD274|CDKN1A|FCER1G|SYK|NFAM1|CCK|PTPRC|INPP5D|IGHD|HMOX1|VSIG4|TLR4|IL13RA1
31347	1.7532e-05	0.00025454	12	148	525	28942	regulation of defense response	FCGR1|FCGR3|KLRK1|FCER1G|CLEC7A|PTGER3|TLR7|CCK|CD36|ADRB2|TLR5|TLR4
48878	1.7804e-05	0.00025576	23	467	525	28942	chemical homeostasis	KCNJ10|GOT1|PRKCB|CHRNA4|SLC11A1|PTGER3|PCSK9|MT2|AVPR1A|CLDN1|ADRA1A|ADRA2A|ACACA|HERPUD1|PTPRC|SLC9A9|C3AR1|RGN|CHP2|BCL2|TRIM24|CD36|HAMP
35466	1.7804e-05	0.00025576	29	671	525	28942	regulation of signaling pathway	SERPINE2|ONECUT1|IQGAP1|HMGCR|ADRA1A|SOCS2|CYTH4|LEPR|TRIM24|CD36|RALGDS|VAV3|SYK|HSPA5|PRKCB|NFAM1|CCK|NPNT|TLR1|SFRP1|PTPRC|ST5|ID1|RGN|HCLS1|RAPGEF5|DOCK2|TLR4|CD44
43065	1.8071e-05	0.00025674	17	282	525	28942	positive regulation of apoptosis	NQO1|SPI1|PCSK9|SERPINB9|CCK|BRCA1|ADRB2|FCGR1|FCGR3|PTPRC|DDIT3|INPP5D|HMOX1|NUPR1|TLR4|ALDH1A7|CD44
42116	1.8156e-05	0.00025674	5	19	525	28942	macrophage activation	TLR1|SLC11A1|TLR7|TLR5|TLR4
2886	1.8156e-05	0.00025674	5	19	525	28942	regulation of myeloid leukocyte mediated immunity	FCGR1|FCGR3|FCER1G|SYK|HMOX1
1932	1.901e-05	0.00026743	13	174	525	28942	regulation of protein amino acid phosphorylation	SYK|CCK|AIF1|MAPK15|EGFR|SFRP1|PTPRC|RAP2B|CCDC88C|BCL2|HCLS1|TLR4|CD44
48643	2.3421e-05	0.00032777	3	4	525	28942	positive regulation of skeletal muscle tissue development	BCL2|ADRB2|HMGCR
48534	2.3647e-05	0.00032924	17	288	525	28942	hemopoietic or lymphoid organ development	SPI1|SYK|NFAM1|ONECUT1|SLA|PIRB|POU2F2|VAV1|RUNX1|CNN2|DCSTAMP|PTPRC|LY6D|BCL2|HCLS1|IRF8|DOCK2
30001	2.3799e-05	0.00032966	22	443	525	28942	metal ion transport	CAMK2B|HCN3|SLC38A1|KCND1|KCNJ10|STEAP4|PRKCB|CHRNA4|SLC11A1|SLC10A2|SLA|KCNJ16|ATP2A1|NAV2|SLC30A10|SLC4A8|PTPRC|NIPAL1|SLC9A9|CHP2|KCTD12|KCNK1
19882	2.4017e-05	0.000331	7	48	525	28942	antigen processing and presentation	FCGR1|FCGR3|FCER1G|SLC11A1|IFI30|PSMB8|PSMB9
51171	2.4263e-05	0.00033269	68	2252	525	28942	regulation of nitrogen compound metabolic process	SPI1|ITGB2|ONECUT1|IKZF4|SALL1|DBP|SALL2|BASP1|CREB3L2|TRIM24|TEAD1|TLE4|APOBEC1|VAV3|TSC22D1|PRKCB|NFAM1|TNNC1|SLC11A1|ARID5B|ETV1|VAV1|GEM|RUNX1|TOX2|DDIT3|RFX4|TFEC|RGN|MCM3|VOPP1|IRF8|TLR4|JDP2|SMARCD3|ADRB2|AIF1|NPAS2|ARNTL|KLRK1|ZFP57|CUX2|HMOX1|HES1|PPARGC1A|WNT2|E2F8|BANP|MBD1|CCK|PARP14|POU2F2|MAPK15|ELL3|PER2|PTPRC|PER3|CAMK4|MAFF|ID1|SNAI1|BCL2|ID4|SP5|TAF4B|GTF2IRD1|LPIN1|NFE2L2
43085	2.5006e-05	0.00034116	18	319	525	28942	positive regulation of catalytic activity	VAV3|CISH|CERK|GADD45B|SYK|HSPA5|SLC11A1|PTGER3|EIF2AK3|CCK|ADRB2|ADRA1A|EGFR|TLR1|PTPRC|RGN|BCL2|TLR4
6633	2.6472e-05	0.00035936	9	86	525	28942	fatty acid biosynthetic process	SYK|FASN|ELOVL3|ELOVL6|CYP4A14|BRCA1|SCD1|ACACA|PTGS1
10740	2.7997e-05	0.00037704	10	108	525	28942	positive regulation of intracellular protein kinase cascade	PTPRC|PRKCB|ST5|LEPR|HCLS1|CCK|CD36|ADRA1A|TLR4|CD44
51186	2.8052e-05	0.00037704	14	207	525	28942	cofactor metabolic process	GGT7|ALAS1|GSTT3|MTHFR|HMGCR|SPTB|ACACA|MTHFD1L|EHHADH|NAMPT|ACOT2|ACOT1|HMOX1|SLC27A3
32147	2.8349e-05	0.00037915	8	67	525	28942	activation of protein kinase activity	TLR1|CISH|CERK|GADD45B|SLC11A1|CCK|TLR4|EGFR
44057	2.9464e-05	0.00039213	18	323	525	28942	regulation of system process	NTRK2|HCN3|KCNJ10|SERPINE2|TNNC1|EIF2AK3|ATP2A1|CCK|AVPR1A|ADRB2|ADRA1A|AIF1|EGFR|PTGS1|AKAP13|TNNT3|CSPG5|HSPA1B
71222	3.0834e-05	0.00040836	5	21	525	28942	cellular response to lipopolysaccharide	IRF8|CCK|CD14|CD36|TLR4
34097	3.1578e-05	0.00041619	7	50	525	28942	response to cytokine stimulus	SLC11A1|BCL2|CCK|SERPINA3G|IFIT1|SERPINA3H|SERPINA3I
46942	3.4825e-05	0.00045457	11	134	525	28942	carboxylic acid transport	SLC38A1|KCNJ10|SLC7A8|AQP8|SLC11A1|SLC10A2|PLIN2|ACSL4|CROT|CD36|FOLR2
43408	3.4825e-05	0.00045457	11	134	525	28942	regulation of MAPKKK cascade	SFRP1|PTPRC|SYK|ST5|ID1|LEPR|CCK|CD36|ADRA1A|TLR4|CD44
33674	3.5783e-05	0.00046479	12	159	525	28942	positive regulation of kinase activity	VAV3|TLR1|PTPRC|CISH|CERK|GADD45B|SYK|HSPA5|SLC11A1|CCK|TLR4|EGFR
44282	3.6122e-05	0.00046479	19	359	525	28942	small molecule catabolic process	APOBEC1|ENTPD1|PKLR|GOT1|AKR1D1|PDE4C|ATP2A1|CLPX|CYP39A1|HK3|GLB1|EHHADH|ACOT2|PCYOX1L|UPP2|ABCB1A|GBP2|LPIN1|GBP3
32268	3.6122e-05	0.00046479	19	359	525	28942	regulation of cellular protein metabolic process	SERPINE2|SYK|HSPA5|SPINK5|EIF2AK3|SLA|PCSK9|CCK|AIF1|MAPK15|EGFR|SFRP1|PTPRC|RAP2B|CCDC88C|BCL2|HCLS1|TLR4|CD44
35468	3.6485e-05	0.00046725	14	212	525	28942	positive regulation of signaling pathway	SYK|PRKCB|NFAM1|CCK|NPNT|ADRA1A|PTPRC|ST5|LEPR|HCLS1|CD36|DOCK2|TLR4|CD44
15849	3.7305e-05	0.0004755	11	135	525	28942	organic acid transport	SLC38A1|KCNJ10|SLC7A8|AQP8|SLC11A1|SLC10A2|PLIN2|ACSL4|CROT|CD36|FOLR2
8219	3.7839e-05	0.00048006	24	524	525	28942	cell death	CYFIP2|PEG3|GADD45B|PRKCB|GPR65|LYZ2|TNFRSF18|FGL2|CD5L|EIF2AK3|ANK2|MMD2|CCK|SERPINA3G|NAIP2|BAG3|INPP5D|DDIT4|ID1|BCL2|HMOX1|BMF|CHAC1|TNS4
51173	3.8225e-05	0.0004827	28	664	525	28942	positive regulation of nitrogen compound metabolic process	SPI1|SMARCD3|ITGB2|ONECUT1|ADRB2|AIF1|NPAS2|ARNTL|KLRK1|CREB3L2|TRIM24|HES1|PPARGC1A|TEAD1|WNT2|SLC11A1|ETV1|POU2F2|TOX2|PTPRC|DDIT3|RFX4|CAMK4|BCL2|IRF8|LPIN1|TLR4|NFE2L2
51246	4.0359e-05	0.00050729	21	426	525	28942	regulation of protein metabolic process	SERPINE2|SYK|HSPA5|UBE2C|SPINK5|EIF2AK3|SLA|PCSK9|CCK|AIF1|MAPK15|EGFR|ARNTL|SFRP1|PTPRC|RAP2B|CCDC88C|BCL2|HCLS1|TLR4|CD44
45088	4.0995e-05	0.00051055	7	52	525	28942	regulation of innate immune response	KLRK1|CLEC7A|TLR7|CCK|CD36|TLR5|TLR4
7623	4.0995e-05	0.00051055	7	52	525	28942	circadian rhythm	PER2|MTNR1A|PER3|DBP|MT2|NPAS2|ARNTL
31401	4.1416e-05	0.00051344	10	113	525	28942	positive regulation of protein modification process	RAP2B|SYK|HSPA5|BCL2|HCLS1|CCK|TLR4|AIF1|MAPK15|CD44
30888	4.2476e-05	0.00052394	6	36	525	28942	regulation of B cell proliferation	CDKN1A|PTPRC|INPP5D|IGHD|TLR4|IL13RA1
23033	4.2649e-05	0.00052394	88	3191	525	28942	signaling pathway	ACVRL1|CERK|GPR65|ITGB2|BRCA1|RND2|ADRA1A|WISP1|HERPUD1|NSDHL|RGS2|GNGT2|RGS1|C3AR1|LEPR|CD36|CCR3|CMKLR1|IL13RA1|DACT1|TLE4|VAV3|ENTPD1|FCER1G|CISH|SYK|PRKCB|GPR35|NFAM1|SLC11A1|ADAM11|ARID5B|GAB2|AVPR1A|GFRA2|ADRA2A|VAV1|GEM|CSF2RB2|FCGR1|ARL4C|TLR1|FCGR3|MTNR1A|SFRP1|RAP2B|DOK3|RAB36|DDIT3|TLR7|RAB39|NUPR1|RAPGEF5|TLR5|PLCB2|TLR4|ALDH1A7|RGS16|PTGER3|FPR1|IQGAP1|ADRB2|PIRB|EGFR|SOCS2|KLRK1|CLE…
1934	4.5437e-05	0.00055568	9	92	525	28942	positive regulation of protein amino acid phosphorylation	RAP2B|SYK|BCL2|HCLS1|CCK|TLR4|AIF1|MAPK15|CD44
31399	4.7062e-05	0.00057298	14	217	525	28942	regulation of protein modification process	SYK|HSPA5|CCK|AIF1|MAPK15|EGFR|SFRP1|PTPRC|RAP2B|CCDC88C|BCL2|HCLS1|TLR4|CD44
30098	4.8146e-05	0.00058356	10	115	525	28942	lymphocyte differentiation	SPI1|PTPRC|SYK|NFAM1|ONECUT1|LY6D|BCL2|POU2F2|DOCK2|VAV1
51347	4.8465e-05	0.00058481	12	164	525	28942	positive regulation of transferase activity	VAV3|TLR1|PTPRC|CISH|CERK|GADD45B|SYK|HSPA5|SLC11A1|CCK|TLR4|EGFR
32729	4.9482e-05	0.00059182	5	23	525	28942	positive regulation of interferon-gamma production	KLRK1|SLC11A1|IRF8|CCK|TLR4
32755	4.9482e-05	0.00059182	5	23	525	28942	positive regulation of interleukin-6 production	FCER1G|TLR7|CCK|CD36|TLR4
16265	5.2417e-05	0.00062418	24	535	525	28942	death	CYFIP2|PEG3|GADD45B|PRKCB|GPR65|LYZ2|TNFRSF18|FGL2|CD5L|EIF2AK3|ANK2|MMD2|CCK|SERPINA3G|NAIP2|BAG3|INPP5D|DDIT4|ID1|BCL2|HMOX1|BMF|CHAC1|TNS4
19219	5.5256e-05	0.00065511	66	2225	525	28942	regulation of nucleobase, nucleoside, nucleotide and nucleic acid metabolic process	SPI1|ITGB2|ONECUT1|IKZF4|SALL1|DBP|SALL2|BASP1|CREB3L2|TRIM24|TEAD1|TLE4|APOBEC1|VAV3|TSC22D1|PRKCB|NFAM1|TNNC1|SLC11A1|ARID5B|ETV1|VAV1|GEM|RUNX1|TOX2|DDIT3|RFX4|TFEC|RGN|MCM3|VOPP1|IRF8|TLR4|JDP2|SMARCD3|ADRB2|NPAS2|ARNTL|ZFP57|CUX2|HMOX1|HES1|PPARGC1A|WNT2|E2F8|BANP|MBD1|CCK|PARP14|POU2F2|MAPK15|ELL3|PER2|PTPRC|PER3|CAMK4|MAFF|ID1|SNAI1|BCL2|ID4|SP5|TAF4B|GTF2IRD1|LPIN1|NFE2L2
7610	5.7492e-05	0.00066731	22	470	525	28942	behavior	NTRK2|FCER1G|SERPINE2|CHRNA4|ITGB2|FPR1|CXCL1|ETV1|CCK|AVPR1A|HMGCR|NPAS2|RUNX1|TYMP|CXCL10|FCGR3|CCL6|C3AR1|LEPR|BCL2|DOCK2|CCR3
45844	5.776e-05	0.00066731	3	5	525	28942	positive regulation of striated muscle tissue development	BCL2|ADRB2|HMGCR
42590	5.776e-05	0.00066731	3	5	525	28942	antigen processing and presentation of exogenous peptide antigen via MHC class I	FCGR1|FCGR3|FCER1G
7098	5.776e-05	0.00066731	3	5	525	28942	centrosome cycle	GADD45A|BRCA1|KIF11
48636	5.776e-05	0.00066731	3	5	525	28942	positive regulation of muscle organ development	BCL2|ADRB2|HMGCR
61081	5.776e-05	0.00066731	3	5	525	28942	positive regulation of myeloid leukocyte cytokine production involved in immune response	FCER1G|CD36|TLR4
43410	5.8639e-05	0.0006746	8	74	525	28942	positive regulation of MAPKKK cascade	PTPRC|ST5|LEPR|CCK|CD36|ADRA1A|TLR4|CD44
34641	6.0111e-05	0.00068861	82	2947	525	28942	cellular nitrogen compound metabolic process	SPI1|ALAS1|PPP1R10|ONECUT1|ATP2A1|BRCA1|IKZF4|SALL1|DBP|SALL2|CREB3L2|NAMPT|TRIM24|UPP2|TEAD1|GAMT|TLE4|APOBEC1|ENTPD1|TSC22D1|PRKCB|SLC11A1|URAD|PDE4C|ARID5B|DNTT|ETV1|SPTB|CLPX|ADRA2A|RUNX1|DBF4|OAS2|DDIT3|RFX4|TFEC|MCM3|VOPP1|IRF8|SNRNP25|ATP6V0D2|SGK2|JDP2|LY6E|PRIM2|SMARCD3|HMGCR|AK7|NPAS2|ARNTL|TYMP|ZFP57|CUX2|MTHFD1L|HMOX1|HES1|ABCB1A|GBP2|PPARGC1A|E2F8|BANP|GBP3|PKLR|ATP8B2|GOT1|MBD1|MTHF…
9056	6.0958e-05	0.00069538	32	830	525	28942	catabolic process	LYZ2|AKR1D1|PCSK9|PLD4|ATP2A1|PSMB10|HK3|HMOX1|UPP2|CD36|ABCB1A|GBP2|GBP3|APOBEC1|ENTPD1|PKLR|GOT1|HSPA5|USP2|PDE4C|CLPX|PSMB8|PSMB9|CYP39A1|OAS2|GLB1|EHHADH|ACOT2|PCYOX1L|PNPLA3|LPIN1|PLCB2
34976	6.1575e-05	0.00069948	5	24	525	28942	response to endoplasmic reticulum stress	HSPA5|DDIT3|EIF2AK3|NFE2L2|HERPUD1
55080	6.4122e-05	0.00072538	15	252	525	28942	cation homeostasis	PRKCB|SLC11A1|PTGER3|MT2|AVPR1A|ADRA1A|HERPUD1|PTPRC|SLC9A9|C3AR1|RGN|CHP2|BCL2|TRIM24|HAMP
35556	6.5377e-05	0.0007365	26	613	525	28942	intracellular signal transduction	PTGER3|IQGAP1|ADRB2|RND2|ADRA1A|EGFR|HMOX1|EPS8L2|RALGDS|P2RY12|VAV3|GADD45B|SYK|SLC11A1|EIF2AK3|AVPR1A|GEM|ARL4C|TLR1|PTPRC|RAP2B|DOK3|RAB36|RAB39|RAPGEF5|TLR4
6812	6.5996e-05	0.00074041	24	543	525	28942	cation transport	CAMK2B|HCN3|SLC38A1|KCND1|KCNJ10|STEAP4|CHRNA2|PRKCB|CHRNA4|SLC11A1|SLC10A2|SLA|KCNJ16|ATP2A1|NAV2|SLC30A10|SLC4A8|PTPRC|NIPAL1|SLC9A9|CHP2|KCTD12|KCNK1|ATP6V0D2
2718	6.72e-05	0.0007475	4	13	525	28942	regulation of cytokine production involved in immune response	FCER1G|HMOX1|CD36|TLR4
6910	6.72e-05	0.0007475	4	13	525	28942	phagocytosis, recognition	FCGR1|FCGR3|CLEC7A|CD36
9653	6.7454e-05	0.0007475	41	1185	525	28942	anatomical structure morphogenesis	ACVRL1|SPI1|SMARCD3|SERPINE2|INSIG2|ONECUT1|ADRB2|ADRA1A|EGFR|TTN|TYMP|LEPR|HMOX1|HES1|WNT2|GAMT|DYNC2H1|VAV3|NTRK2|VCAM1|DST|PEG3|HSPA5|FZD6|COBL|ARID5B|NEB|ETV1|CCK|NPNT|GEM|SFRP1|RFX4|MAB21L2|ID1|SNAI1|BCL2|NES|ALDH1A7|CD44|LY6E
45449	6.8947e-05	0.00076093	60	1980	525	28942	regulation of transcription	SPI1|ITGB2|ONECUT1|IKZF4|SALL1|DBP|SALL2|BASP1|CREB3L2|TRIM24|TEAD1|TLE4|TSC22D1|PRKCB|NFAM1|SLC11A1|ARID5B|ETV1|GEM|RUNX1|TOX2|DDIT3|RFX4|TFEC|MCM3|VOPP1|IRF8|TLR4|JDP2|SMARCD3|ADRB2|NPAS2|ARNTL|ZFP57|CUX2|HMOX1|HES1|PPARGC1A|WNT2|E2F8|BANP|MBD1|CCK|PARP14|POU2F2|MAPK15|ELL3|PER2|PER3|CAMK4|MAFF|ID1|SNAI1|BCL2|ID4|SP5|TAF4B|GTF2IRD1|LPIN1|NFE2L2
42110	7.4201e-05	0.00081561	10	121	525	28942	T cell activation	PTPRC|SYK|FCGR4|SLC11A1|ITGB2|BCL2|WAS|CCK|DOCK2|VAV1
51049	7.5339e-05	0.00082478	23	513	525	28942	regulation of transport	P2RY12|NTRK2|FCER1G|SERPINE2|SYK|PRKCB|CHRNA4|TNNC1|SLC11A1|PDE4C|AVPR1A|ADRB2|AACS|ADRA2A|PTGS1|FCGR1|CNN2|STX1B|FCGR3|CLEC7A|BCL2|HMOX1|CD36
45807	7.8722e-05	0.00085492	6	40	525	28942	positive regulation of endocytosis	FCGR1|FCGR3|FCER1G|CLEC7A|SLC11A1|CD36
2700	7.8722e-05	0.00085492	6	40	525	28942	regulation of production of molecular mediator of immune response	PTPRC|FCER1G|HMOX1|CD36|TLR4|IL13RA1
51336	9.1035e-05	0.0009847	15	260	525	28942	regulation of hydrolase activity	VAV3|SERPINE2|HSPA5|TNNC1|PTGER3|SPINK5|EIF2AK3|SERPINB9|CCK|ADRA1A|VAV1|HERPUD1|RGN|LEPR|HSPA1B
45577	9.2733e-05	0.00098733	4	14	525	28942	regulation of B cell differentiation	PTPRC|SYK|NFAM1|INPP5D
50853	9.2733e-05	0.00098733	4	14	525	28942	B cell receptor signaling pathway	PTPRC|SYK|PRKCB|NFAM1
2224	9.2733e-05	0.00098733	4	14	525	28942	toll-like receptor signaling pathway	TLR7|CCK|TLR5|TLR4
2702	9.2733e-05	0.00098733	4	14	525	28942	positive regulation of production of molecular mediator of immune response	FCER1G|CD36|TLR4|IL13RA1
6807	9.3777e-05	0.00099085	83	3032	525	28942	nitrogen compound metabolic process	SPI1|ALAS1|PPP1R10|ONECUT1|ATP2A1|BRCA1|IKZF4|SALL1|DBP|SALL2|CREB3L2|NAMPT|TRIM24|UPP2|TEAD1|GAMT|TLE4|APOBEC1|ENTPD1|TSC22D1|PRKCB|SLC11A1|URAD|PDE4C|ARID5B|DNTT|ETV1|SPTB|CLPX|ADRA2A|RUNX1|DBF4|OAS2|DDIT3|RFX4|TFEC|MCM3|VOPP1|IRF8|SNRNP25|ATP6V0D2|SGK2|JDP2|LY6E|PRIM2|SMARCD3|HMGCR|AK7|NPAS2|ARNTL|TYMP|ZFP57|CUX2|MTHFD1L|HMOX1|HES1|ABCB1A|GBP2|PPARGC1A|E2F8|BANP|GBP3|PKLR|ATP8B2|GOT1|MBD1|MTHF…
2237	9.3794e-05	0.00099085	8	79	525	28942	response to molecule of bacterial origin	TLR1|SLC11A1|IRF8|CCK|CD14|CD36|TLR5|TLR4
40008	9.4563e-05	0.00099511	17	322	525	28942	regulation of growth	GAMT|FDPS|HSD3B7|SERPINE2|CISH|PRKCB|AVPR1A|ADRB2|WISP1|SOCS2|BCL2|CSPG5|IRF8|CD36|SCD1|WNT2|CD44
Cellular_Component
GO-ID	p-value	corr p-value	x	n	X	N	Description	Genes in test set
44464	1.4047e-38	2.179e-36	406	14242	536	29335	cell part	CYFIP2|SPI1|SERPINE2|CLDN1|NSDHL|CREB3L2|NAMPT|C3AR1|CMKLR1|GAMT|GBP5|PRKCB|EML1|CLPX|DDIT3|RFX4|DDIT4|ACOT2|VOPP1|ACOT1|PRR18|RPL26|TSPYL5|RETSAT|FPR1|IQGAP1|SLC30A10|ACMSD|CYP2B9|CYB5R3|KLRK1|HMOX1|PPARGC1A|ZBTB7C|GSTM3|GSTM2|PMM1|FZD6|EIF2AK3|MTHFR|CGN|ELL3|SQLE|FASN|SNAI1|GTF2IRD1|HAMP|CDKN1A|AACS|SIGLECE|SLC6A4|TRIM6|B3GALT1|TEAD1|KCND1|GPR35|NFAM1|TNNC1|ELOVL3|DNTT|ELOVL6|SERPINB9|PTGR1|COQ…
5623	1.4335e-38	2.179e-36	406	14243	536	29335	cell	CYFIP2|SPI1|SERPINE2|CLDN1|NSDHL|CREB3L2|NAMPT|C3AR1|CMKLR1|GAMT|GBP5|PRKCB|EML1|CLPX|DDIT3|RFX4|DDIT4|ACOT2|VOPP1|ACOT1|PRR18|RPL26|TSPYL5|RETSAT|FPR1|IQGAP1|SLC30A10|ACMSD|CYP2B9|CYB5R3|KLRK1|HMOX1|PPARGC1A|ZBTB7C|GSTM3|GSTM2|PMM1|FZD6|EIF2AK3|MTHFR|CGN|ELL3|SQLE|FASN|SNAI1|GTF2IRD1|HAMP|CDKN1A|AACS|SIGLECE|SLC6A4|TRIM6|B3GALT1|TEAD1|KCND1|GPR35|NFAM1|TNNC1|ELOVL3|DNTT|ELOVL6|SERPINB9|PTGR1|COQ…
5622	7.569e-20	6.3063e-18	280	9776	536	29335	intracellular	CYFIP2|SPI1|SERPINE2|CERK|IFI30|MKI67|IKZF4|LGALS3|LGALS1|RASSF4|CREB3L2|NAMPT|INSC|TRIM24|CHAC1|CYP2C70|TNS4|MFSD2A|DYNC2H1|PRKCB|SLC11A1|ACSL4|ANK2|DLEC1|EML1|CLPX|RUNX1|CYP39A1|SOAT1|PPP1R3C|DDIT3|RFX4|DDIT4|ACOT2|VOPP1|ACOT1|PRR18|RPL26|ATP6V0D2|TSPYL5|RETSAT|FUT11|IQGAP1|PIK3R5|CYB5R3|INPP5D|GM6768|HMOX1|PPARGC1A|RALGDS|ZBTB7C|BANP|GSTM3|GSTM2|PMM1|GADD45B|GADD45A|SLC10A2|EIF2AK3|IFI44|PARVB…
5737	8.2978e-20	6.3063e-18	217	6760	536	29335	cytoplasm	CYFIP2|SERPINE2|CERK|IFI30|MKI67|LGALS3|LGALS1|RASSF4|CREB3L2|NAMPT|INSC|TRIM24|CHAC1|CYP2C70|TNS4|MFSD2A|DYNC2H1|PRKCB|SLC11A1|ACSL4|ANK2|DLEC1|EML1|CLPX|CYP39A1|SOAT1|PPP1R3C|DDIT3|DDIT4|ACOT2|ACOT1|PRR18|RPL26|ATP6V0D2|RETSAT|FUT11|IQGAP1|PIK3R5|CYB5R3|INPP5D|GM6768|HMOX1|PPARGC1A|GSTM3|GSTM2|PMM1|EIF2AK3|IFI44|PARVB|PARP14|LRP2BP|SQLE|FASN|ID1|HAMP|CDKN1A|PCSK9|BRCA1|CROT|AACS|CTSS|CYP2C39|HE…
16020	1.3347e-19	8.1149e-18	230	7386	536	29335	membrane	CYFIP2|CERK|AQP8|CLDN1|NSDHL|NIPAL1|CREB3L2|C3AR1|CYP2C70|TNS4|CMKLR1|MFSD2A|DYNC2H1|GBP5|ENTPD1|PRKCB|SLC11A1|ACSL4|ANK2|MMD2|TIMD4|CLPX|DSG1C|CYP39A1|STX1B|SOAT1|VOPP1|KCTD12|ATP6V0D2|IGSF6|RETSAT|FUT11|SDC3|FPR1|IQGAP1|SLC30A10|PIK3R5|CYB5R3|KLRK1|INPP5D|TSPAN4|HMOX1|CD14|GSTM2|SLC10A2|FZD6|EIF2AK3|CGN|PARVB|SQLE|MARCO|ACVRL1|SLC44A3|SLC35F1|CTSS|CYP2C39|SIGLECE|SLC6A4|HERPUD1|CYP2C38|GNGT2|B3…
267	2.0263e-18	9.747e-17	65	1020	536	29335	cell fraction	CYFIP2|SERPINE2|CERK|AQP8|GBE1|ITGB2|ATP2A1|CROT|CYP46A1|RND2|ADRA1A|CYP2C39|SLC6A4|CYP2C38|CYP2C70|CD36|SCD1|PPFIA2|ABCC4|SLC38A1|SLC15A2|PRKCB|CYP4A10|DIO1|ACSL4|CYP4A14|CYP39A1|STX1B|CYP2A5|CYP2A4|SOAT1|PPP1R3C|CYP21A1|NNMT|CHRNA4|LYZ2|RGS16|SDC3|HSD17B6|ADRB2|HMGCR|ACACA|ACMSD|PTGS1|CYP2B9|CYB5R3|CYP2C55|BAG3|INPP5D|HMOX1|FDPS|HSD3B7|GSTM2|PKLR|GOT1|MTHFR|FMO2|CYP8B1|SQLE|MTL5|GLB1|CCDC88C|ID…
44424	2.2444e-18	9.747e-17	271	9540	536	29335	intracellular part	CYFIP2|SPI1|SERPINE2|CERK|IFI30|MKI67|IKZF4|LGALS3|LGALS1|RASSF4|CREB3L2|NAMPT|INSC|TRIM24|CHAC1|CYP2C70|TNS4|MFSD2A|DYNC2H1|PRKCB|SLC11A1|ACSL4|ANK2|DLEC1|EML1|CLPX|RUNX1|CYP39A1|SOAT1|PPP1R3C|DDIT3|RFX4|DDIT4|ACOT2|VOPP1|ACOT1|PRR18|RPL26|ATP6V0D2|TSPYL5|RETSAT|FUT11|IQGAP1|PIK3R5|CYB5R3|INPP5D|GM6768|HMOX1|PPARGC1A|BANP|GSTM3|GSTM2|PMM1|GADD45B|GADD45A|SLC10A2|EIF2AK3|IFI44|PARVB|PARP14|ELL3|L…
5792	6.1762e-15	2.1456e-13	30	276	536	29335	microsome	AQP8|ATP2A1|HSD17B6|ADRB2|HMGCR|CYP46A1|CYP2C39|PTGS1|CYP2C38|CYP2B9|CYP2C55|HMOX1|CYP2C70|CD36|SCD1|HSD3B7|CYP4A10|DIO1|FMO2|ACSL4|CYP4A14|CYP8B1|CYP39A1|SQLE|CYP2A5|CYP2A4|SOAT1|PPP1R3C|CYP21A1|BCL2
5886	6.3521e-15	2.1456e-13	113	2905	536	29335	plasma membrane	CYFIP2|STEAP4|CLSTN3|GPR65|AQP8|LY75|CLDN1|BASP1|RGS1|C3AR1|CHP2|LEPR|TNS4|CMKLR1|DYNC2H1|GBP5|SLC38A1|SLC15A2|CISH|PRKCB|CD300A|CYBB|ANK2|GEM|DSG1C|FCGR1|FCGR3|MTNR1A|DOK3|LY6D|CD300E|LY6A|RAB39|KCTD12|ATP6V0D2|LY6E|COL17A1|CD274|CHRNA2|CHRNA4|FPR1|IQGAP1|ADRB2|SLC30A10|KLRK1|CLEC7A|INPP5D|HMOX1|CD300LD|CD14|GSTM2|CD163|VCAM1|SLC10A2|FZD6|MT2|CGN|PARVB|LRFN3|ITGB2L|PTPRC|CSPG5|ITGB2|ADRA1A|SLC6A…
42598	1.213e-14	3.6877e-13	30	283	536	29335	vesicular fraction	AQP8|ATP2A1|HSD17B6|ADRB2|HMGCR|CYP46A1|CYP2C39|PTGS1|CYP2C38|CYP2B9|CYP2C55|HMOX1|CYP2C70|CD36|SCD1|HSD3B7|CYP4A10|DIO1|FMO2|ACSL4|CYP4A14|CYP8B1|CYP39A1|SQLE|CYP2A5|CYP2A4|SOAT1|PPP1R3C|CYP21A1|BCL2
5624	5.8105e-13	1.6058e-11	47	767	536	29335	membrane fraction	CYFIP2|SERPINE2|CERK|CHRNA4|AQP8|RGS16|ITGB2|SDC3|ATP2A1|HSD17B6|ADRB2|HMGCR|CYP46A1|ADRA1A|CYP2C39|SLC6A4|PTGS1|CYP2C38|CYP2B9|CYP2C55|BAG3|HMOX1|CYP2C70|CD36|SCD1|PPFIA2|ABCC4|HSD3B7|SLC38A1|SLC15A2|PRKCB|CYP4A10|DIO1|FMO2|ACSL4|CYP4A14|CYP8B1|CYP39A1|SQLE|STX1B|CYP2A5|CYP2A4|SOAT1|PPP1R3C|CYP21A1|BCL2|FOLR2
5626	8.3397e-13	2.1127e-11	48	804	536	29335	insoluble fraction	CYFIP2|SERPINE2|CERK|CHRNA4|AQP8|RGS16|ITGB2|SDC3|ATP2A1|HSD17B6|ADRB2|HMGCR|CYP46A1|ADRA1A|CYP2C39|SLC6A4|PTGS1|CYP2C38|CYP2B9|CYP2C55|BAG3|HMOX1|CYP2C70|CD36|SCD1|PPFIA2|ABCC4|HSD3B7|SLC38A1|SLC15A2|PRKCB|CYP4A10|DIO1|FMO2|ACSL4|CYP4A14|CYP8B1|CYP39A1|SQLE|STX1B|CYP2A5|CYP2A4|SOAT1|PPP1R3C|CYP21A1|CCDC88C|BCL2|FOLR2
5783	2.256e-11	5.2755e-10	47	852	536	29335	endoplasmic reticulum	RETSAT|CLSTN3|INSIG2|LYZ2|PCSK9|ATP2A1|HSD17B6|HMGCR|CYP46A1|CYP2C39|PTGS1|HERPUD1|CYP2C38|CYB5R3|CYP2C55|CREB3L2|HMOX1|CYP2C70|SCD1|MFSD2A|HSD3B7|HSPA5|CYP4A10|ELOVL3|DIO1|TMEM132A|EIF2AK3|SYVN1|CYBB|ELOVL6|FMO2|ACSL4|CYP4A14|CYP8B1|CYP39A1|SQLE|CYP2A5|P4HA1|CYP2A4|SOAT1|CYP21A1|BCL2|CSPG5|PRR18|TLR7|STT3B|LPIN1
44425	2.6417e-11	5.7363e-10	180	6263	536	29335	membrane part	CYFIP2|PILRB1|PILRB2|STEAP4|CLEC4N|CLSTN3|GPR65|AQP8|LY75|SLA|CYP46A1|CLDN1|NSDHL|NIPAL1|CREB3L2|C3AR1|LEPR|SLC26A10|TNS4|CMKLR1|IL13RA1|MFSD2A|SLC38A1|ENTPD1|SLC15A2|PRKCB|CD300A|SLC11A1|DIO1|ADAM11|CYBB|ACSL4|ANK2|MMD2|TIMD4|MPEG1|DSG1C|FCGR1|STX1B|FCGR3|MTNR1A|EMCN|TYROBP|SOAT1|FCGR4|SLC9A9|LY6D|VOPP1|CD300E|LY6A|KCTD12|SLC27A3|ABCG3|CLEC4F|ATP6V0D2|LY6E|COL17A1|CD274|IGSF6|CHRNA2|RETSAT|INSIG…
44444	5.7848e-11	1.1724e-09	133	4193	536	29335	cytoplasmic part	STEAP4|SERPINE2|CERK|CLSTN3|SLA|IFI30|CYP46A1|CREB3L2|CYP2C70|MFSD2A|PRKCB|TPM2|SLC11A1|USP2|DIO1|CYBB|ACSL4|CLPX|CYP39A1|RAB36|SOAT1|PPP1R3C|SLC9A9|ACOT2|ACOT1|PRR18|RPL26|SLC27A3|ATP6V0D2|DGKH|IDI1|RETSAT|INSIG2|LYZ2|FUT11|ADRB2|ACACA|CYB5R3|BAG3|GM6768|HMOX1|BMF|SLC15A3|PPARGC1A|FDPS|GOT1|HSPA5|TMEM132A|EIF2AK3|NEB|SQLE|P4HA1|FES|FASN|BCL2|LCN2|CSPG5|STT3B|HAMP|CDKN1A|ABCD2|ALAS1|KEG1|PCSK9|AT…
43229	1.5617e-10	2.9671e-09	215	8081	536	29335	intracellular organelle	SPI1|SERPINE2|CERK|IFI30|MKI67|IKZF4|LGALS3|LGALS1|CREB3L2|NAMPT|TRIM24|CYP2C70|TNS4|MFSD2A|DYNC2H1|PRKCB|SLC11A1|ACSL4|ANK2|EML1|CLPX|RUNX1|CYP39A1|SOAT1|DDIT3|RFX4|ACOT2|VOPP1|ACOT1|PRR18|RPL26|ATP6V0D2|TSPYL5|RETSAT|FUT11|PIK3R5|CYB5R3|GM6768|HMOX1|PPARGC1A|BANP|GADD45B|GADD45A|SLC10A2|EIF2AK3|PARVB|PARP14|ELL3|SQLE|FASN|ID1|SNAI1|ID4|GTF2IRD1|CDKN1A|PPP1R10|PCSK9|MYL6B|BRCA1|KIF11|CROT|CTSS|C…
43226	2.1032e-10	3.761e-09	215	8106	536	29335	organelle	SPI1|SERPINE2|CERK|IFI30|MKI67|IKZF4|LGALS3|LGALS1|CREB3L2|NAMPT|TRIM24|CYP2C70|TNS4|MFSD2A|DYNC2H1|PRKCB|SLC11A1|ACSL4|ANK2|EML1|CLPX|RUNX1|CYP39A1|SOAT1|DDIT3|RFX4|ACOT2|VOPP1|ACOT1|PRR18|RPL26|ATP6V0D2|TSPYL5|RETSAT|FUT11|PIK3R5|CYB5R3|GM6768|HMOX1|PPARGC1A|BANP|GADD45B|GADD45A|SLC10A2|EIF2AK3|PARVB|PARP14|ELL3|SQLE|FASN|ID1|SNAI1|ID4|GTF2IRD1|CDKN1A|PPP1R10|PCSK9|MYL6B|BRCA1|KIF11|CROT|CTSS|C…
31224	3.8793e-10	6.5517e-09	162	5623	536	29335	intrinsic to membrane	PILRB1|PILRB2|STEAP4|CLEC4N|CLSTN3|GPR65|AQP8|LY75|SLA|CYP46A1|CLDN1|NSDHL|NIPAL1|CREB3L2|C3AR1|LEPR|SLC26A10|CMKLR1|IL13RA1|MFSD2A|SLC38A1|ENTPD1|SLC15A2|CD300A|SLC11A1|DIO1|ADAM11|CYBB|ACSL4|ANK2|MMD2|TIMD4|MPEG1|DSG1C|FCGR1|STX1B|FCGR3|MTNR1A|EMCN|TYROBP|SOAT1|FCGR4|SLC9A9|LY6D|VOPP1|CD300E|LY6A|KCTD12|SLC27A3|ABCG3|CLEC4F|LY6E|COL17A1|CD274|IGSF6|CHRNA2|INSIG2|CHRNA4|FUT11|SDC3|FPR1|PLD4|ADRB…
9986	1.1768e-09	1.8829e-08	25	317	536	29335	cell surface	ACVRL1|CD274|CLEC12A|CHRNA4|ITGB2|LY75|KLRK1|LGALS1|CLEC7A|CD36|CD34|NTRK2|FCER1G|VCAM1|HSPA5|NFAM1|TNFRSF18|FCGR1|DCSTAMP|PTPRC|LY6D|IGHD|LY6A|TLR4|CD44
43227	1.9227e-09	2.9224e-08	191	7122	536	29335	membrane-bounded organelle	SPI1|STEAP4|SERPINE2|CERK|CLSTN3|SLA|IFI30|MKI67|CYP46A1|IKZF4|LGALS3|RGS2|SALL1|LGALS1|SALL2|BASP1|CREB3L2|NAMPT|TRIM24|CYP2C70|HMGN3|MFSD2A|TLE4|PRKCB|SLC11A1|DIO1|ARID5B|CYBB|ACSL4|CLPX|GEM|RUNX1|CYP39A1|RAB36|SOAT1|DDIT3|RFX4|SLC9A9|ACOT2|VOPP1|ACOT1|PRR18|SNRNP25|NUPR1|SLC27A3|ATP6V0D2|TSPYL5|DGKH|IDI1|RETSAT|INSIG2|LYZ2|FUT11|ADRB2|NPAS2|ACACA|PIK3R5|CYB5R3|ZFP57|GM6768|HMOX1|BMF|SLC15A3|PP…
43231	2.9436e-09	4.2341e-08	190	7110	536	29335	intracellular membrane-bounded organelle	SPI1|STEAP4|SERPINE2|CERK|CLSTN3|SLA|IFI30|MKI67|CYP46A1|IKZF4|LGALS3|RGS2|SALL1|LGALS1|SALL2|BASP1|CREB3L2|NAMPT|TRIM24|CYP2C70|HMGN3|MFSD2A|TLE4|PRKCB|SLC11A1|DIO1|ARID5B|CYBB|ACSL4|CLPX|GEM|RUNX1|CYP39A1|RAB36|SOAT1|DDIT3|RFX4|SLC9A9|ACOT2|VOPP1|ACOT1|PRR18|SNRNP25|NUPR1|SLC27A3|ATP6V0D2|TSPYL5|DGKH|IDI1|RETSAT|INSIG2|LYZ2|FUT11|ADRB2|NPAS2|ACACA|PIK3R5|CYB5R3|ZFP57|GM6768|HMOX1|BMF|SLC15A3|PP…
16021	3.0641e-09	4.2341e-08	156	5501	536	29335	integral to membrane	PILRB1|PILRB2|STEAP4|CLEC4N|CLSTN3|GPR65|AQP8|LY75|SLA|CYP46A1|CLDN1|NSDHL|NIPAL1|CREB3L2|C3AR1|LEPR|SLC26A10|CMKLR1|IL13RA1|MFSD2A|SLC38A1|ENTPD1|SLC15A2|CD300A|SLC11A1|DIO1|ADAM11|CYBB|ACSL4|ANK2|MMD2|TIMD4|MPEG1|DSG1C|FCGR1|STX1B|FCGR3|MTNR1A|EMCN|TYROBP|SOAT1|FCGR4|SLC9A9|VOPP1|CD300E|KCTD12|SLC27A3|ABCG3|CLEC4F|COL17A1|CD274|IGSF6|CHRNA2|INSIG2|CHRNA4|FUT11|SDC3|FPR1|PLD4|ADRB2|SLC30A10|TMEM…
44459	1.8608e-08	2.4595e-07	58	1444	536	29335	plasma membrane part	CYFIP2|STEAP4|AQP8|ITGB2|LY75|CLDN1|SLC6A4|GNGT2|LEPR|CD36|TNS4|CD34|ABCC4|KCND1|SLC15A2|FCER1G|DST|SYK|PRKCB|GPR35|TNFRSF18|CYBB|ANK2|DSG1C|FCGR1|TLR1|ARHGAP10|IGHD|LY6A|KCTD12|ATP6V0D2|CD44|COL17A1|CD274|CHRNA2|CHRNA4|RGS16|ADRB2|AIF1|EGFR|KLRK1|CLEC7A|HMOX1|ABCB1A|P2RY12|NTRK2|KCNJ10|SLC10A2|FZD6|MT2|CGN|PARVB|LRFN3|ITGB2L|PTPRC|AXL|KCNK1|HSPA1B
5625	5.6613e-06	7.1709e-05	19	312	536	29335	soluble fraction	FDPS|GSTM2|NNMT|PKLR|GOT1|PRKCB|LYZ2|GBE1|MTHFR|CROT|RND2|ACACA|ACMSD|CYB5R3|MTL5|PPP1R3C|GLB1|INPP5D|ID1
5576	7.0533e-06	8.5768e-05	56	1653	536	29335	extracellular region	SPON2|ADAMDEC1|ORM1|CXCL9|SERPINE2|PCSK9|CXCL1|ORM3|SERPINA7|ORM2|WISP1|LOXL2|FCNA|LGALS3|LGALS1|DBP|LEPR|EMILIN2|CD34|ENTPD1|PEG3|TNFRSF18|NAV2|NPNT|GREM2|SFRP1|ANGPTL7|COL17A1|C1QB|APCS|C1QA|PCOLCE2|LYZ2|SAA3|FGL2|CD5L|CFP|CCL6|SERPINA3A|CD14|PLTP|WNT2|R3HDML|CD163|HSPA5|CCK|CXCL10|PCYOX1L|LCN2|SAA1|SP5|SAA2|SIGLEC1|SFTPA1|HAMP|C1QC
9897	1.0969e-05	0.00012825	14	189	536	29335	external side of plasma membrane	CD274|FCER1G|CHRNA4|TNFRSF18|LY75|FCGR1|KLRK1|PTPRC|CLEC7A|IGHD|LY6A|CD36|CD34|CD44
44421	3.8559e-05	0.00042894	33	841	536	29335	extracellular region part	COL17A1|C1QB|SPON2|ORM1|CXCL9|SERPINE2|SAA3|FGL2|PCSK9|CXCL1|ORM3|SERPINA7|ORM2|FCNA|LGALS3|LGALS1|DBP|CCL6|LEPR|EMILIN2|CD14|WNT2|ENTPD1|CCK|NAV2|NPNT|CXCL10|GREM2|LCN2|SAA1|SP5|SAA2|SFTPA1
71212	3.9507e-05	0.00042894	14	212	536	29335	subsynaptic reticulum	RETSAT|HSPA5|LYZ2|EIF2AK3|PCSK9|CYBB|ELOVL6|FMO2|ATP2A1|HMGCR|HERPUD1|CYB5R3|BCL2|STT3B
Molecular_Function
GO-ID	p-value	corr p-value	x	n	X	N	Description	Genes in test set
5488	9.5147e-37	6.8221e-34	325	10282	519	28947	binding	CYFIP2|SPON2|ADAMDEC1|SPI1|SERPINE2|CERK|IFIT1|CLDN1|IKZF4|LGALS3|NSDHL|LGALS1|RASSF4|CREB3L2|NAMPT|INSC|C3AR1|TRIM24|CYP2C70|TNS4|GAMT|DYNC2H1|GBP5|ENTPD1|PRKCB|ACSL4|ANK2|CLPX|DSG1C|RUNX1|CYP39A1|STX1B|SFRP1|PPP1R3C|DDIT3|RFX4|HIST2H4|KCTD12|ALPK1|SDC3|FPR1|IQGAP1|ACMSD|CYB5R3|KLRK1|INPP5D|TSPAN4|HMOX1|CD14|PPARGC1A|ZBTB7C|BANP|GSTM2|PMM1|GADD45B|GADD45A|EIF2AK3|MTHFR|PARVB|PARP14|LRP2BP|SQLE|F…
5515	7.3549e-24	2.6367e-21	193	5378	519	28947	protein binding	CYFIP2|SPON2|SPI1|SERPINE2|CLDN1|IKZF4|LGALS3|LGALS1|RASSF4|CREB3L2|NAMPT|C3AR1|TRIM24|TNS4|GAMT|PRKCB|ANK2|CLPX|RUNX1|STX1B|SFRP1|PPP1R3C|DDIT3|RFX4|HIST2H4|KCTD12|SDC3|IQGAP1|KLRK1|INPP5D|TSPAN4|HMOX1|PPARGC1A|ZBTB7C|BANP|GSTM2|GADD45B|GADD45A|EIF2AK3|PARVB|PARP14|LRP2BP|CCDC88C|ID1|ID4|HAMP|ACVRL1|CDKN1A|PPP1R10|PCSK9|SNX10|BRCA1|SLC6A4|AKAP13|TRIM6|CD36|TEAD1|CCR3|VAV3|KCND1|FCER1G|SYK|TNNC1|…
3824	6.7248e-14	1.6072e-11	155	4856	519	28947	catalytic activity	ADAMDEC1|STEAP4|CERK|SLA|IFI30|CYP46A1|LOXL2|NSDHL|NAMPT|TRIM24|CYP2C70|GAMT|DYNC2H1|GBP5|ENTPD1|PRKCB|USP2|DIO1|ADAM11|CYBB|ACSL4|CLPX|TUBA4A|GEM|CYP39A1|NAIP2|PHOSPHO1|TYROBP|SOAT1|ACOT2|ACOT1|SLC27A3|ALPK1|ABCG3|DGKH|IDI1|PFKFB3|NNMT|RETSAT|LYZ2|FUT11|GSTT3|PLD4|AK7|ACACA|ACMSD|PIK3R5|CYB5R3|INPP5D|ALDH3B1|HMOX1|GSTM3|FDPS|GSTM2|GGT7|PMM1|ATP8B2|GOT1|UBE2C|EIF2AK3|MTHFR|PARP14|SQLE|PTPRC|P4HA1…
16491	3.4598e-12	6.2017e-10	42	675	519	28947	oxidoreductase activity	STEAP4|RETSAT|AKR1D1|SLA|HSD17B6|HMGCR|IFI30|CYP46A1|CYP2C39|PTGS1|CYP2C38|LOXL2|NSDHL|CYB5R3|CYP2C55|ALDH1B1|ALDH3B1|HMOX1|CYP2C70|SCD1|NQO1|HSD3B7|BC089597|CYP4A10|DIO1|MTHFR|CYBB|FMO2|CYP4A14|PTGR1|CYP8B1|CYP39A1|SQLE|CYP2A5|P4HA1|CYP2A4|FASN|CYP21A1|EHHADH|PCYOX1L|CYP2G1|ALDH1A7
16705	2.854e-11	4.0926e-09	18	132	519	28947	oxidoreductase activity, acting on paired donors, with incorporation or reduction of molecular oxygen	CYP4A10|FMO2|CYP4A14|CYP46A1|CYP8B1|CYP2C39|PTGS1|CYP2C38|CYP39A1|SQLE|CYP2A5|P4HA1|CYP2A4|CYP2C55|CYP21A1|HMOX1|CYP2C70|SCD1
9055	4.3428e-10	5.1896e-08	15	102	519	28947	electron carrier activity	NQO1|STEAP4|CYP4A10|CYBB|CYP4A14|CYP46A1|CYP8B1|CYP2C39|CYP2C38|CYP39A1|CYP2A5|CYP2A4|CYP2C55|CYP21A1|CYP2C70
5529	1.3401e-09	1.2891e-07	20	208	519	28947	sugar binding	CLEC4A1|APCS|CLEC4A3|SELPLG|CLEC12A|CLEC4N|CRYBG3|GBE1|LY75|SIGLECE|FCNA|LGALS3|KLRK1|LGALS1|CLEC7A|GLB1|SIGLEC1|SFTPA1|CLEC4F|CD33
5506	1.4383e-09	1.2891e-07	18	167	519	28947	iron ion binding	STEAP4|CYP4A10|CYBB|CYP4A14|CYP46A1|CYP8B1|CYP2C39|PTGS1|CYP2C38|CYP39A1|CYP2A5|P4HA1|CYP2A4|CYP2C55|CYP21A1|HMOX1|CYP2C70|SCD1
30246	4.5008e-09	3.5856e-07	25	345	519	28947	carbohydrate binding	CLEC4A1|APCS|CLEC4A3|SELPLG|SERPINE2|PCOLCE2|CLEC12A|CLEC4N|CRYBG3|GBE1|LY75|SIGLECE|FCNA|LGALS3|KLRK1|LGALS1|CLEC7A|CD33|NAV2|PTPRC|GLB1|SIGLEC1|SFTPA1|CLEC4F|CD44
20037	5.423e-09	3.8883e-07	14	104	519	28947	heme binding	CYP4A10|CYP4A14|CYP46A1|CYP8B1|CYP2C39|PTGS1|CYP2C38|CYP39A1|CYP2A5|CYP2A4|CYP2C55|CYP21A1|HMOX1|CYP2C70
4497	6.186e-09	4.0321e-07	15	123	519	28947	monooxygenase activity	CYP4A10|FMO2|CYP4A14|CYP46A1|CYP8B1|CYP2C39|CYP2C38|CYP39A1|SQLE|CYP2A5|CYP2A4|CYP2C55|CYP21A1|CYP2C70|CYP2G1
46906	1.2787e-08	7.6403e-07	14	111	519	28947	tetrapyrrole binding	CYP4A10|CYP4A14|CYP46A1|CYP8B1|CYP2C39|PTGS1|CYP2C38|CYP39A1|CYP2A5|CYP2A4|CYP2C55|CYP21A1|HMOX1|CYP2C70
16740	1.9738e-08	1.0886e-06	62	1628	519	28947	transferase activity	ACVRL1|CDKN1A|ALAS1|CERK|GBE1|KEG1|SLA|CROT|AKAP13|HK3|NAMPT|B3GALT1|TRIM24|UPP2|GAMT|SYK|PRKCB|HUNK|DNTT|ELOVL6|HCK|SULT1D1|DBF4|TYROBP|SOAT1|GM4952|OAS2|SLC27A3|ALPK1|SGK2|DGKH|B4GALT5|CAMK2B|PRIM2|PFKFB3|NNMT|FUT11|GSTT3|OAS1A|AK7|EGFR|PIK3R5|TYMP|GSTM3|NTRK2|FDPS|GSTM2|GGT7|PKLR|GOT1|EIF2AK3|CCK|PARP14|MAPK15|WEE1|SBK1|AXL|FES|FASN|CAMK4|PNPLA3|STT3B
17076	8.7179e-07	4.4648e-05	61	1774	519	28947	purine nucleotide binding	ACVRL1|ABCD2|STEAP4|CERK|ATP2A1|KIF11|RND2|AACS|HK3|DYNC2H1|GBP5|ABCC4|ENTPD1|TGTP1|SYK|PRKCB|HUNK|CYBB|ACSL4|CLPX|TUBA4A|GEM|RUNX1|ARL4C|NAIP2|HCK|RAP2B|RAB36|MCM3|RAB39|ALPK1|ABCG3|DOCK2|SGK2|CAMK2B|HCN3|OAS1A|AK7|EGFR|ACACA|CYB5R3|MTHFD1L|GBP2|GBP3|NTRK2|KCNJ10|PKLR|ATP8B2|HSPA5|UBE2C|EIF2AK3|MTHFR|FMO2|CCK|MAPK15|SQLE|WEE1|SBK1|AXL|FES|CAMK4
30528	8.2194e-06	0.00036435	41	1093	519	28947	transcription regulator activity	SPI1|SMARCD3|ONECUT1|NPAS2|IKZF4|ARNTL|ZFP57|CUX2|DBP|SALL2|BASP1|CREB3L2|TRIM24|HES1|PPARGC1A|TEAD1|E2F8|TLE4|TSC22D1|ETV1|POU2F2|MAPK15|ELL3|GEM|RUNX1|TOX2|DDIT3|RFX4|CAMK4|MAFF|ID1|TFEC|SNAI1|BCL2|ID4|TAF4B|IRF8|GTF2IRD1|LPIN1|JDP2|NFE2L2
70330	8.6943e-06	0.00036435	6	28	519	28947	aromatase activity	CYP2A5|CYP2A4|CYP2C55|CYP2C70|CYP2C39|CYP2C38
32555	9.1577e-06	0.00036435	56	1701	519	28947	purine ribonucleotide binding	ACVRL1|ABCD2|CERK|ATP2A1|KIF11|RND2|AACS|HK3|DYNC2H1|GBP5|ABCC4|ENTPD1|TGTP1|SYK|PRKCB|HUNK|ACSL4|CLPX|TUBA4A|GEM|RUNX1|ARL4C|NAIP2|HCK|RAP2B|RAB36|MCM3|RAB39|ALPK1|ABCG3|DOCK2|SGK2|CAMK2B|HCN3|OAS1A|AK7|EGFR|ACACA|CYB5R3|MTHFD1L|GBP2|GBP3|NTRK2|KCNJ10|PKLR|ATP8B2|HSPA5|UBE2C|EIF2AK3|CCK|MAPK15|WEE1|SBK1|AXL|FES|CAMK4
32553	9.314e-06	0.00036435	56	1702	519	28947	ribonucleotide binding	ACVRL1|ABCD2|CERK|ATP2A1|KIF11|RND2|AACS|HK3|DYNC2H1|GBP5|ABCC4|ENTPD1|TGTP1|SYK|PRKCB|HUNK|ACSL4|CLPX|TUBA4A|GEM|RUNX1|ARL4C|NAIP2|HCK|RAP2B|RAB36|MCM3|RAB39|ALPK1|ABCG3|DOCK2|SGK2|CAMK2B|HCN3|OAS1A|AK7|EGFR|ACACA|CYB5R3|MTHFD1L|GBP2|GBP3|NTRK2|KCNJ10|PKLR|ATP8B2|HSPA5|UBE2C|EIF2AK3|CCK|MAPK15|WEE1|SBK1|AXL|FES|CAMK4
166	9.655e-06	0.00036435	64	2042	519	28947	nucleotide binding	ACVRL1|ABCD2|STEAP4|CERK|ATP2A1|KIF11|RND2|AACS|HK3|DYNC2H1|GBP5|ABCC4|ENTPD1|TGTP1|SYK|PRKCB|HUNK|CYBB|ACSL4|CLPX|TUBA4A|GEM|RUNX1|ARL4C|NAIP2|HCK|RAP2B|RAB36|MCM3|RAB39|SLC27A3|ALPK1|ABCG3|DOCK2|SGK2|CAMK2B|HCN3|OAS1A|HMGCR|AK7|EGFR|ACACA|CYB5R3|MTHFD1L|GBP2|PPARGC1A|GBP3|NTRK2|KCNJ10|PKLR|ATP8B2|HSPA5|UBE2C|EIF2AK3|MTHFR|FMO2|CCK|MAPK15|SQLE|WEE1|SBK1|AXL|FES|CAMK4
16712	1.0797e-05	0.00038707	6	29	519	28947	oxidoreductase activity, acting on paired donors, with incorporation or reduction of molecular oxygen, reduced flavin or flavoprotein as one donor, and incorporation of one atom of oxygen	CYP2A5|CYP2A4|CYP2C55|CYP2C70|CYP2C39|CYP2C38
43167	1.5839e-05	0.00054079	89	3190	519	28947	ion binding	ACVRL1|SPON2|ADAMDEC1|CDKN1A|STEAP4|CLSTN3|PPP1R10|GBE1|SLA|MYL6B|ATP2A1|BRCA1|CYP46A1|IKZF4|CYP2C39|CYP2C38|LIMD2|LOXL2|AKAP13|TRIM6|SALL1|SALL2|CHP2|TRIM24|CYP2C70|SCD1|CD34|PLS1|APOBEC1|VAV3|KCND1|DST|PEG3|PRKCB|TNNC1|CYP4A10|TNNC2|PDE4C|ADAM11|CYBB|DNTT|CYP4A14|PTGR1|NPNT|CLPX|DSG1C|CYP39A1|NAIP2|PHOSPHO1|CYP2A5|DBF4|CYP2A4|CYP21A1|RGN|PLCB2|B4GALT5|APCS|PRIM2|IDI1|ZFP429|RGS16|AIF1|ACACA|ACM…
19865	1.9689e-05	0.00064169	4	10	519	28947	immunoglobulin binding	FCGR1|LGALS3|FCGR3|FCER1G
19763	2.2617e-05	0.00070506	3	4	519	28947	immunoglobulin receptor activity	FCGR1|FCGR3|FCER1G
43169	2.4492e-05	0.0007317	88	3181	519	28947	cation binding	ACVRL1|SPON2|ADAMDEC1|CDKN1A|STEAP4|CLSTN3|PPP1R10|GBE1|SLA|MYL6B|ATP2A1|BRCA1|CYP46A1|IKZF4|CYP2C39|CYP2C38|LIMD2|LOXL2|AKAP13|TRIM6|SALL1|SALL2|CHP2|TRIM24|CYP2C70|SCD1|PLS1|APOBEC1|VAV3|KCND1|DST|PEG3|PRKCB|TNNC1|CYP4A10|TNNC2|PDE4C|ADAM11|CYBB|DNTT|CYP4A14|PTGR1|NPNT|CLPX|DSG1C|CYP39A1|NAIP2|PHOSPHO1|CYP2A5|DBF4|CYP2A4|CYP21A1|RGN|PLCB2|B4GALT5|APCS|PRIM2|IDI1|ZFP429|RGS16|AIF1|ACACA|ACMSD|PT…
30554	2.6351e-05	0.00075576	49	1473	519	28947	adenyl nucleotide binding	ACVRL1|ABCD2|STEAP4|CERK|ATP2A1|KIF11|AACS|HK3|DYNC2H1|ABCC4|ENTPD1|SYK|PRKCB|HUNK|CYBB|ACSL4|CLPX|RUNX1|NAIP2|HCK|MCM3|ALPK1|ABCG3|SGK2|CAMK2B|HCN3|OAS1A|AK7|EGFR|ACACA|CYB5R3|MTHFD1L|NTRK2|KCNJ10|PKLR|ATP8B2|HSPA5|UBE2C|EIF2AK3|MTHFR|FMO2|CCK|MAPK15|SQLE|WEE1|SBK1|AXL|FES|CAMK4
