# Supplementary material for: Silicon dioxide nanoparticles induce insulin resistance through endoplasmic reticulum stress and generation of reactive oxygen species
Source: Part Fibre Toxicol. 2019 Nov 7;16:41. doi: 10.1186/s12989-019-0327-z (PMC6836410; doi:10.1186/s12989-019-0327-z)
Supplement: Supplementary file 4 — Additional file 4: Table S3. List of primer sequences (XLS 28 kb) [file 12989_2019_327_MOESM4_ESM.xls]

## Sheet: Sheet1
Table S3: List of primers
primer	forward (5'-3')	reverse (5'-3')
36B4	GTAGTCAGTCTCCACAGACAAAGC	CCGTGTGAGGTCACAGTACC
ATF6	TGGGCAGGACTATGAAGTAATG	CAACGACTCAGGGATGGTGCTG
Cd163	ATGGGCTAACTCCAGCGCCG	GATCCATCTGAGCAGGTCACTCCA
CYP2b9	CACAGATGACCAGTTCCTTCATCT	GTTCCTGCTGTTTTTTGACAATTT
Cyp2c70	CATGGAAACAAACCCGGCGTTTCTC	GCATCCAACATATAAAGGATTTCCTCC
Cyp4a14	CATCATAACCCACGTTTCTGG	TCCTCCTGAGAATGGCAGAT
CHOP	GGGAAACAGCGCATGAAGGA	GCGTGATGGTGCTGGGTACA
Cxcl1	GCTTGAAGGTGTTGCCCTCAG	AGAAGCCAGCGTTCACCAGAC
GCLC	CTGCACATCTACCACGCAGT	GTCTCAAGAACATCGCCTCC
GCLM	CGGGAACCTGCTCAACTG	CCAAAACATCTGGAAACTCCC
GSS	GAAGCAGCTCGAAGAACTGG	AGCACTGGGTACTGGTGAGG
HO-1	CCCACCAAGTTCAAACAGCTC	AGGAAGGCGGTCTTAGCC
Hspa1a	TCCCGGTGCTGGCTAGGAGACAGATA	CAGGGAAGATAAAGCCCACGTGCA
GRP78	CGTATCCCCTGCGTCTTGTC	CAGCAGCCTCCGGCTCTA
Nrf2	CAGCTACTCCCAGGTTGCCCACATT	GCCAAACTTGCTCCATGTCCTGCTCTAT
Nqo1	TGGCCGAACACAAGAAGCTGGAA	CCCCGTGGACACCCTGAAGAGAGT
PERK	AGTCCCTGCTCGAATCTTCCT	TCCCAAGGCAGAACAGATATACC
Ppp1r10	TGATGGAGGCCACAGTCATG	GGTAGAAGGCACAGTTGTTC
SOD1	ACCATCCACTTCGAGCAGAA	AAAATGAGGTCCTGCACTGG
SOD2	AACTCAGGTCGCTCTTCAGC	GCTTGATAGCCTCCAGCAAC
Tlr5	GGACACTGAAGGATTTGAAGATG	GGACCATCTGTATGCTTGGAATA
XBP1 for AGE	ACCTGAGCCCGGAGGAGAAA	GTCCAGAATGCCCAAAAGGA
XBP1-s	TGAGAACCAGGAGTTAAGAACACGC	CCTGCACCTGCTGCGGAC
XBP1-u	TGAGAACCAGGAGTTAAGAACACGC	CACATAGTCTGAGTGCTGCGG
